# Supplementary material for: Thioamide synthesis via copper-catalyzed C–H activation of 1,2,3-thiadiazoles enabled by slow release and capture of thioketenes
Source: Royal Society of Chemistry journal article supplement (doi:10.1039/d2qo00152g), 2022-01-01
Supplement: d2qo00152g1.pdf [file d2qo00152g1.pdf]

## Supporting Information

### **Thioamides Synthesis via Copper-Catalyzed C-H Activation of 1,2,3-Thiadiazoles Enabled by Slow Release and Capture of Thioketene**

Changhui Lu, Xiaohong Li, Shunqin Chang, Yuqi Zhang, Donghui Xing, Shuo Wang,  
Yueping Lin, Huanfeng Jiang and Liangbin Huang\*

Key Laboratory of Functional Molecular Engineering of Guangdong Province, School of  
Chemistry and Chemical Engineering, South China University of Technology, Guangzhou  
510640, P. R. China

## Table of Contents

|                                                                                                                                |     |
|--------------------------------------------------------------------------------------------------------------------------------|-----|
| I. General Information .....                                                                                                   | 3   |
| II. Optimization Study .....                                                                                                   | 5   |
| III. Methods for the Synthesis of 1,2,3-Thiadiazole Derivatives .....                                                          | 10  |
| IV Methods for the Synthesis of Amine Substrates .....                                                                         | 23  |
| V. General Procedures for Cu(OAc) <sub>2</sub> -Catalysed Thioamidation of 5 <i>H</i> -<br>1,2,3-Thiadiazoles with Amines..... | 28  |
| VI. Analysis Data for the Products.....                                                                                        | 30  |
| VII. Mechanism Studies .....                                                                                                   | 63  |
| VIII. NMR Spectra of Compounds .....                                                                                           | 82  |
| IX. Reference.....                                                                                                             | 192 |

## I. General Information

### Reagents

All compounds were used as received unless otherwise noted.

### Metals and Ligand

All metal catalysts and ligands, unless otherwise noted, were stored and handled in a nitrogen-filled glovebox. Cu(OAc)<sub>2</sub> was purchased from *Energy Chemical* and used as received. Other catalyst in condition optimization table were Cu(acac)<sub>2</sub> (*Energy Chemical*), CuSO<sub>4</sub> (*Energy Chemical*), CuCl<sub>2</sub> (Innochem), CuCl (*Energy Chemical*), Cu(OAc) (*Energy Chemical*), Pd(OAc)<sub>2</sub> (*Energy Chemical*), Ni(OAc)<sub>2</sub> (*Bidepharm*), Co(OAc)<sub>2</sub> (Adamas) and Cu(OAc) (*Energy Chemical*). The ligands used were Xantphos (*Bidepharm*), DPPF (*Bidepharm*), PPh<sub>3</sub> (*Energy Chemical*), PCy<sub>3</sub> (*Energy Chemical*), bpy (Laajoo), 1,10-Phenanthroline (Accela), IPr-HCl (*Energy Chemical*), IMes-HCl (Innochem).

### Solvents:

The solvent *N,N*-dimethylformamide (DMF) and CH<sub>3</sub>CN were purchased from *Energy Chemical*. Tetrahydrofuran (THF) and 1,4-dioxane were distilled from sodium/benzophenone and stored under nitrogen before use.

### Analytical Methods

<sup>1</sup>H nuclear magnetic resonance (NMR) spectroscopy chemical shifts are reported in ppm and referenced to TMS (tetramethylsilane) in CDCl<sub>3</sub> (δ = 0 ppm) or the residual solvent peak for CDCl<sub>3</sub> (δ = 7.26 ppm). For <sup>13</sup>C NMR chemical shifts, the residual solvent peak (CDCl<sub>3</sub>, δ = 77.00 ppm) were used as references. NMR spectra were recorded on Avance Bruker NMR spectrometers operating at either 400 MHz or 500 MHz and data analysis was performed using the MestReNova software. Chemical shifts are reported in parts per million (ppm), multiplicities are indicated by s (singlet), d (doublet), t (triplet), q (quartet), m (multiplet) and br (broad). Coupling constants (J)

are reported in Hertz. Melting points were measured using a melting point instrument. IR spectra were obtained with an infrared spectrometer on either potassium bromide pellets or liquid films between two potassium bromide pellets. GC analyses were performed on an Agilent 7890B GC equipped with HP-5 columns (30 m × 320 μm × 0.25 μm), FID detectors, and hydrogen as the carrier gas. A sample volume of 1 μL was injected at a temperature of 250 °C and a 15:1 split ratio. The initial inlet pressure was 2.7 psi but varied as the column flow was held constant at 1 mL/min for the duration of the run. The initial oven temperature of 60 °C was held for 0 min followed by a temperature ramp of 50 °C/min up to 300 °C. The temperature was held at 300 °C for 6 min. The total run time was ~10.8 min and the FID temperature was 300 °C. GC/MS analyses were performed on a Shimadzu GCMS-QP2010SE equipped with an RTX-5MS column (30 m × 0.25 mm × 0.25 μm) with a quadrupole mass analyzer using helium as the carrier gas. The analysis method used in all cases was 5 μL injection of sample, an injection temp of 250 °C, and no split ratio. The initial inlet pressure was 7.8 psi, but varied as the column flow was held constant at 1.7 mL/min for the duration of the run. The interface temperature was held at 250 °C, and the ion source (EI+, 30 eV) was held at 250 °C. The initial oven temperature was held at 50 °C for 1 min with the detector off, followed by a temperature ramp, with the detector on, to 250 °C at 30 °C/min. The temperature was held at 250 °C for 0 min, then to 280 °C and held for 7 min. Total run time was 16.2 min. High resolution mass spectra (HRMS) was carried out on a electrospray (ESI+) ionization methods (ESI-quadrupole). Thin layer chromatography was performed on TLC Silica Gel 60 F254 plates. Visualization was accomplished with potassium permanganate after inspection under UV light. Flash chromatography was performed using silica gel 60, particle size 0.040-0.063 mm using standard flash techniques.

## **Procedure**

All reactions were conducted in oven-dried Schlenk tubes. All the reaction temperatures reported are oil bath temperatures.

## II. Optimization Study

General Procedure for the Optimization Reactions: To an oven-dried 20-mL Schlenk tube equipped with a magnetic stir bar were subsequently added with 1,2,3-thiadiazoles (0.1 mmol), catalyst (10 mol%), ligand (10 mol%) and amine (0.1 mmol) at room temperature, then solvent (0.5 mL) was added. The tube was placed under vacuum and backfilled with N<sub>2</sub> (3 times). The resulting mixture was maintained with stirring at the selected temperature for 8 h. After the reaction, the mixture was diluted with EtOAc (2 mL) and subjected to GC analysis with dodecane as the internal standard.

**Table S1: Screening the metal catalysts.<sup>[a]</sup>**

Reaction scheme: 1a (0.1 mmol) + 2a (1 equiv)  $\xrightarrow[\text{DMF (0.2 M), 90 }^\circ\text{C, 8 h}]{\text{10 mol\% Cat., 10 mol\% Xantphos}}$  3aa

| Entry | Cat.                                                                | Yield (%) |
|-------|---------------------------------------------------------------------|-----------|
| 1     | No Cat.                                                             | n.d.      |
| 2     | Cu(OAc) <sub>2</sub>                                                | 95        |
| 3     | Cu(acac) <sub>2</sub> , CuSO <sub>4</sub> or CuCl <sub>2</sub>      | trace     |
| 4     | Cu(acac) <sub>2</sub> + 10 mol% NaOAc                               | 22%       |
| 5     | CuCl                                                                | n.d.      |
| 6     | CuOAc                                                               | 71%       |
| 7     | Pd(OAc) <sub>2</sub> , Ni(OAc) <sub>2</sub> or Fe(OAc) <sub>2</sub> | trace     |
| 8     | Co(OAc) <sub>2</sub>                                                | 12        |
| 9     | AgOAc                                                               | 66        |
| 10    | Ag <sub>2</sub> CO <sub>3</sub>                                     | 9         |

<sup>[a]</sup> All reactions were performed on a 0.1 mmol scale. Yield was determined by GC analysis with dodecane as an internal standard.

**Table S2: Screening the ligands.<sup>[a]</sup>**

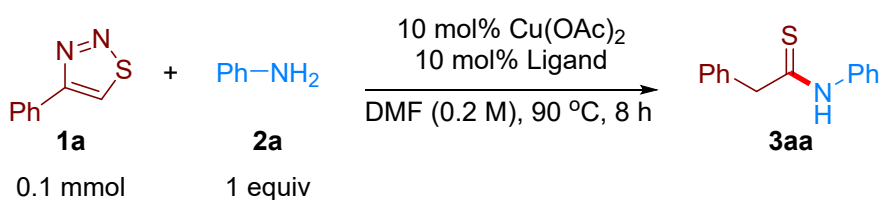  
1a (0.1 mmol) + 2a (1 equiv)  $\xrightarrow[\text{DMF (0.2 M), 90 }^\circ\text{C, 8 h}]{10 \text{ mol\% Cu(OAc)}_2, 10 \text{ mol\% Ligand}}$  3aa

| Entry | Ligand                                            | Yield (%) |
|-------|---------------------------------------------------|-----------|
| 1     | No ligand                                         | trace     |
| 2     | Xantphos                                          | 95        |
| 3     | bpy                                               | 81        |
| 4     | Phenanthroline                                    | 85        |
| 5     | IPr-HCl + 20 mol% Cs <sub>2</sub> CO <sub>3</sub> | 51        |
| 6     | IMes-HCl + 20 mol% LiOtBu                         | trace     |
| 7     | PCy <sub>3</sub>                                  | 74        |
| 8     | PPh <sub>3</sub>                                  | 47        |
| 9     | DPPF                                              | 86        |

<sup>[a]</sup> All reactions were performed on a 0.1 mmol scale. Yield was determined by GC analysis with dodecane as an internal standard.

**Table S3: Screening the solvents and temperature.<sup>[a]</sup>**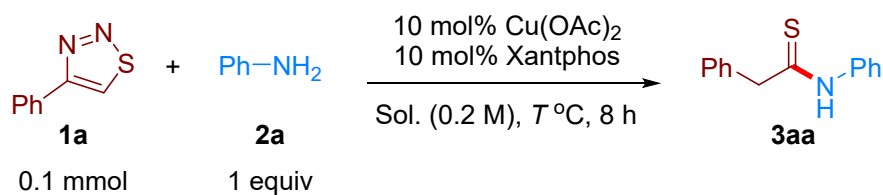

| Entry | Solvent            | Temperature (°C) | Yield (%) |
|-------|--------------------|------------------|-----------|
| 1     | THF                | 90               | 77        |
| 2     | 1,4-dioxane        | 90               | 53        |
| 3     | benzene            | 90               | 45        |
| 4     | DMF                | 90               | 95        |
| 5     | CH <sub>3</sub> CN | 90               | 64        |
| 6     | DCE                | 90               | 24        |
| 7     | DMF                | 60               | 55        |
| 8     | DMF                | r.t.             | n.d.      |

<sup>[a]</sup> All reactions were performed on a 0.1 mmol scale. Yield was determined by GC analysis with dodecane as an internal standard.

**Table S4: Screening the solvents for benzylamine.<sup>[a]</sup>**

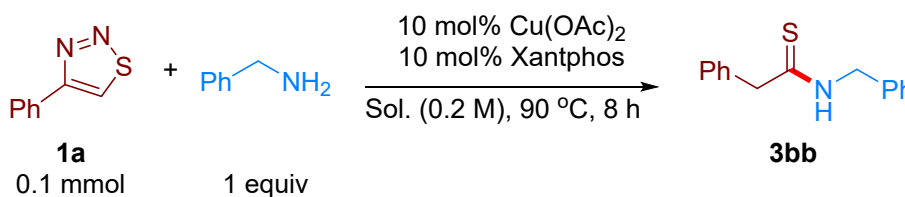  
**1a** (0.1 mmol) + **1 equiv** benzylamine  $\xrightarrow[\text{Sol. (0.2 M), 90 }^\circ\text{C, 8 h}]{10 \text{ mol\% Cu(OAc)}_2, 10 \text{ mol\% Xantphos}}$  **3bb**

| Entry | Solvent            | Yield (%) |
|-------|--------------------|-----------|
| 1     | THF                | 97        |
| 2     | 1,4-dioxane        | 91        |
| 3     | DMF                | 90        |
| 4     | CH <sub>3</sub> CN | 76        |
| 5     | benzene            | 92        |

<sup>[a]</sup> All reactions were performed on a 0.1 mmol scale. Yield was determined by GC analysis with dodecane as an internal standard.



**Table S5: Screening the solvents and ligands for *N*-methylaniline.<sup>[a]</sup>**

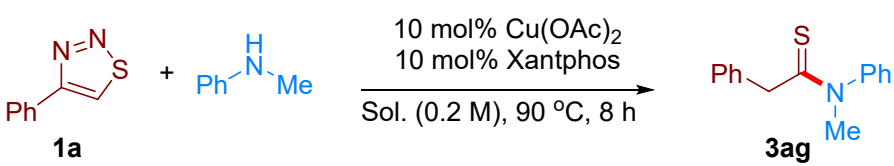

0.1 mmol                      1 equiv

| Entry | Solvent            | Ligand           | Yield (%) |
|-------|--------------------|------------------|-----------|
| 1     | THF                | Xantphos         | 83        |
| 2     | 1,4-dioxane        | Xantphos         | 78        |
| 3     | DMF                | Xantphos         | 90        |
| 4     | CH <sub>3</sub> CN | Xantphos         | 99        |
| 5     | benzene            | Xantphos         | 88        |
| 6     | CH <sub>3</sub> CN | PCy <sub>3</sub> | 86        |
| 7     | CH <sub>3</sub> CN | bpy              | 92        |
| 8     | CH <sub>3</sub> CN | No ligand        | 98        |

<sup>[a]</sup> All reactions were performed on a 0.1 mmol scale. <sup>[b]</sup> Yield was determined by GC analysis with dodecane as an internal standard.

### III. Methods for the Synthesis of 1,2,3-Thiadiazole Derivatives

#### General procedure A:

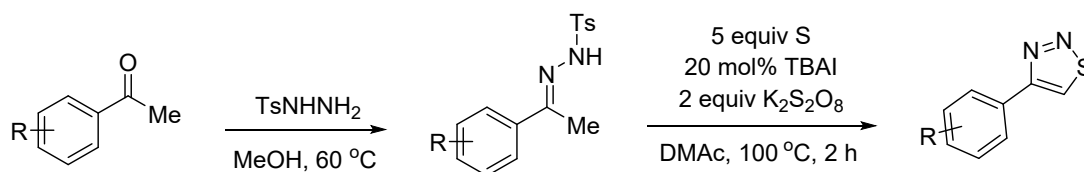

*p*-toluenesulfonylhydrazide (1.86 g, 10 mmol) was placed in a round-bottom boiling flask equipped with a reflux condenser in 10 mL of dry methanol, the ketone (10 mmol) was added slowly and the mixture was heated in an oil bath at 60 °C. Within 5–60 min, *N*-tosylhydrazone began to precipitate. The mixture was cooled to 0 °C, and the product was collected on a Büchner funnel, washed with petroleum ether, and then dried in vacuo to afford the pure product quantitatively.

A sealed tube was charged with *N*-tosylhydrazone (3 mmol), sulfur (15 mmol), TBAI (0.6 mmol), K<sub>2</sub>S<sub>2</sub>O<sub>8</sub> (6 mmol), and DMAC (30 mL). The mixture was stirring under air at 100 °C for 2 h. The mixture was washed with water and extracted by ethyl acetate and then concentrated in vacuum, and the residue was purified by preparative TLC (petroleum ether/ethyl acetate = 20:1) to afford the desired product.<sup>[1]</sup>

#### General procedure B:

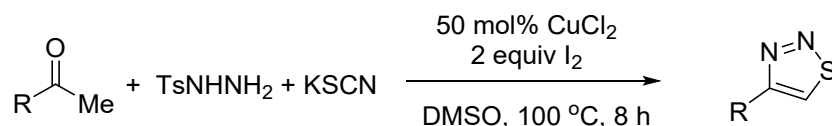

A sealed tube was charged with ketone (1.0 mmol), *p*-toluenesulfonylhydrazide (1.0 mmol), and potassium thiocyanate (97.2 mg, 1.0 mmol), iodine (507.6 mg, 2.0 mmol) at room temperature, and DMSO (3 mL) was added. The resulting mixture was stirred at 100 °C for 1 h. After the reaction completed, the mixture was quenched with saturation Na<sub>2</sub>S<sub>2</sub>O<sub>3</sub> solution (50 mL), extracted with EtOAc (3 × 50 mL). The combined organic layers were washed with brine, dried over anhydrous Na<sub>2</sub>SO<sub>4</sub> and concentrated under reduced pressure. The residue was purified by preparative TLC (petroleum ether/EtOAc = 20:1) to give the product.<sup>[2]</sup>

### General procedure C:

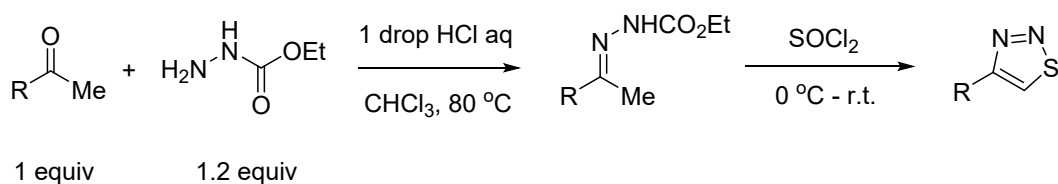

A mixture of acetophenone (1 equiv) and ethyl hydrazine carboxylate (1.2 equiv) was dissolved in chloroform. When the reaction mixture started refluxing, one drop of concentrated hydrochloric acid was added and the mixture was then refluxed overnight with continuous removal of the water generated. The solvent was removed under vacuum and the residue was washed several times with diethyl ether or chloroform to remove excess reactants. Next, an excess amount of thionyl chloride was stirred at 0 °C and the hydrazones were added in several portions. The mixtures were stirred at room temperature overnight until no more hydrogen chloride was produced. The remaining thionyl chloride was evaporated under vacuum and the residue was washed with diethyl ether to give good yields of the corresponding 1,2,3-thiadiazoles as fine powders. A recrystallization from chloroform or dimethylsulfoxide was carried out when necessary.<sup>[3]</sup>

### 4-Phenyl-1,2,3-thiadiazole (1a)

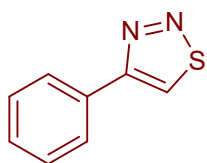

The general procedure C conducted with acetophenone (30 g, 250 mmol), ethyl hydrazinecarboxylate (31.2 g, 1.2 equiv), one drop of concentrated hydrochloric acid in dry  $\text{CHCl}_3$  (100 mL) gave 54.6 g of ethyl (*E*)-2-(1-phenylethylidene)hydrazine-1-carboxylate as a white solid. Dissolving in excess  $\text{SOCl}_2$  (80 mL) for 8 h to give 1,2,3-thiadiazoles as white solid after recrystallization (29.7 g, 73%).  $^1\text{H}$  NMR (500 MHz,  $\text{CDCl}_3$ )  $\delta$  8.65 (s, 1H), 8.05 (dd,  $J = 5.3, 3.4$  Hz, 2H), 7.51 (dd,  $J = 10.3, 4.7$  Hz, 2H), 7.47 – 7.37 (m, 1H).  $^{13}\text{C}$  NMR (126 MHz,  $\text{CDCl}_3$ )  $\delta$  162.9, 130.8, 130.0, 129.5, 129.2, 127.4. Spectroscopic data match those previously reported in the literature.<sup>[1]</sup>

### 4-(*p*-Tolyl)-1,2,3-thiadiazole (1ea)

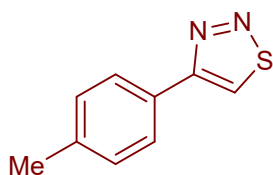

The general procedure A conducted with 1-(p-tolyl)ethan-1-one (1.34 g, 10 mmol), *p*-toluenesulfonylhydrazide (1.86 g, 10 mmol) in dry MeOH (50 mL) gave *N*-tosylhydrazone as a white solid. A sealed tube was charged with *N*-tosylhydrazone (3 mmol), sulfur (480 mg, 15 mmol), TBAI (222 mg, 0.6 mmol), K<sub>2</sub>S<sub>2</sub>O<sub>8</sub> (1.62 g, 6 mmol) in DMAC (30 mL) under air at 100 °C for 2 h gave 4-(p-tolyl)-1,2,3-thiadiazole as white solid (243 mg, 46%). <sup>1</sup>H NMR (500 MHz, CDCl<sub>3</sub>) δ 8.59 (s, 1H), 7.94 (d, *J* = 7.7 Hz, 2H), 7.31 (d, *J* = 7.7 Hz, 2H), 2.42 (s, 3H). <sup>13</sup>C NMR (126 MHz, CDCl<sub>3</sub>) δ 163.0, 139.5, 129.9, 129.3, 128.1, 127.3, 21.4. Spectroscopic data match those previously reported in the literature.<sup>[1]</sup>

#### (4-Methoxyphenyl)-1,2,3-thiadiazole (1eb)

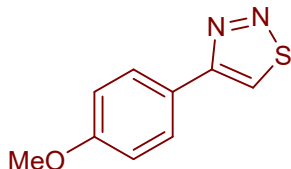

The general procedure A conducted with 1-(4-methoxyphenyl)ethan-1-one (1.5 g, 10 mmol), *p*-toluenesulfonylhydrazide (1.86 g, 10 mmol) in dry MeOH (50 mL) gave *N*-tosylhydrazone as a white solid. A sealed tube was charged with *N*-tosylhydrazone (3 mmol), sulfur (480 mg, 15 mmol), TBAI (222 mg, 0.6 mmol), K<sub>2</sub>S<sub>2</sub>O<sub>8</sub> (1.62 g, 6 mmol) in DMAC (30 mL) under air at 100 °C for 2 h gave 4-(p-tolyl)-1,2,3-thiadiazole as white solid (409 mg, 71%). <sup>1</sup>H NMR (500 MHz, CDCl<sub>3</sub>) δ 8.52 (s, 1H), 7.98 (d, *J* = 6.3 Hz, 2H), 7.03 (d, *J* = 6.3 Hz, 2H), 3.87 (s, 3H). <sup>13</sup>C NMR (126 MHz, CDCl<sub>3</sub>) δ 162.7, 160.5, 128.8, 128.5, 123.6, 114.6, 55.4. Spectroscopic data match those previously reported in the literature.<sup>[1]</sup>

#### (4-Chlorophenyl)-1,2,3-thiadiazole (1ec)

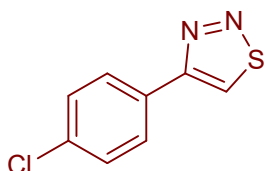

The general procedure A conducted with 1-(4-chlorophenyl)ethan-1-one (1.54 g, 10 mmol), *p*-toluenesulfonylhydrazide (1.86 g, 10 mmol) in dry MeOH (50 mL) gave *N*-tosylhydrazone as a white solid. A sealed tube was charged with *N*-tosylhydrazone (3 mmol), sulfur (480 mg, 15 mmol), TBAI (222 mg, 0.6 mmol), K<sub>2</sub>S<sub>2</sub>O<sub>8</sub> (1.62 g, 6 mmol) in DMAC (30 mL) under air at 100 °C for 2

h gave 4-(4-chlorophenyl)-1,2,3-thiadiazole as pink solid (340 mg, 58%). <sup>1</sup>H NMR (500 MHz, CDCl<sub>3</sub>) δ 8.65 (s, 1H), 7.99 (d, *J* = 8.2 Hz, 2H), 7.49 (d, *J* = 8.2 Hz, 2H). <sup>13</sup>C NMR (126 MHz, CDCl<sub>3</sub>) δ 160.6, 134.3, 129.1, 128.3, 128.2, 127.5. Spectroscopic data match those previously reported in the literature.<sup>[1]</sup>

#### (4-Bromophenyl)-1,2,3-thiadiazole (1ed)

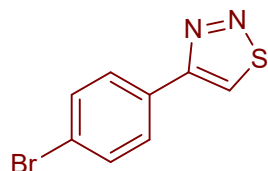

The general procedure A conducted with 1-(4-bromophenyl)ethan-1-one (1.97 g, 10 mmol), *p*-toluenesulfonylhydrazide (1.86 g, 10 mmol) in dry MeOH (50 mL) gave *N*-tosylhydrazone as a white solid. A sealed tube was charged with *N*-tosylhydrazone (3 mmol), sulfur (480 mg, 15 mmol), TBAI (222 mg, 0.6 mmol), K<sub>2</sub>S<sub>2</sub>O<sub>8</sub> (1.62 g, 6 mmol) in DMAC (30 mL) under air at 100 °C for 2 h gave 4-(4-bromophenyl)-1,2,3-thiadiazole as pink solid (540 mg, 75%). <sup>1</sup>H NMR (500 MHz, CDCl<sub>3</sub>) δ 8.65 (s, 1H), 7.92 (d, *J* = 8.2 Hz, 2H), 7.64 (d, *J* = 8.2 Hz, 2H). <sup>13</sup>C NMR (126 MHz, CDCl<sub>3</sub>) δ 161.8, 132.4, 130.3, 129.7, 128.9, 123.7. Spectroscopic data match those previously reported in the literature.<sup>[1]</sup>

#### 4-(1,2,3-thiadiazol-4-yl)benzonitrile (1ee)

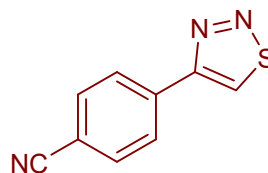

The general procedure A conducted with 4-acetylbenzonitrile (1.45 g, 10 mmol), *p*-toluenesulfonylhydrazide (1.86 g, 10 mmol) in dry MeOH (50 mL) gave *N*-tosylhydrazone as a white solid. A sealed tube was charged with *N*-tosylhydrazone (3 mmol), sulfur (480 mg, 15 mmol), TBAI (222 mg, 0.6 mmol), K<sub>2</sub>S<sub>2</sub>O<sub>8</sub> (1.62 g, 6 mmol) in DMAC (30 mL) under air at 100 °C for 2 h gave 4-(4-cyanophenyl)-1,2,3-thiadiazole as yellow solid (365 mg, 83%). <sup>1</sup>H NMR (500 MHz, CDCl<sub>3</sub>) δ 8.81 (s, 1H), 8.19 (d, *J* = 8.4 Hz, 2H), 7.82 (d, *J* = 8.4 Hz, 2H). <sup>13</sup>C NMR (126 MHz, CDCl<sub>3</sub>) δ 160.9, 134.9, 133.0, 132.1, 127.9, 118.4, 113.0. Spectroscopic data match those previously reported in the literature.<sup>[1]</sup>

#### (3-Fluorophenyl)-1,2,3-thiadiazole (1ef)

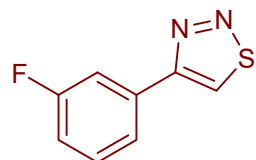

The general procedure A conducted with 1-(3-

fluorophenyl)ethan-1-one (1.38 g, 10 mmol), *p*-toluenesulfonylhydrazide (1.86 g, 10 mmol) in dry MeOH (50 mL) gave *N*-tosylhydrazone as a white solid. A sealed tube was charged with *N*-tosylhydrazone (3 mmol), sulfur (480 mg, 15 mmol), TBAI (222 mg, 0.6 mmol), K<sub>2</sub>S<sub>2</sub>O<sub>8</sub> (1.62 g, 6 mmol) in DMAC (30 mL) under air at 100 °C for 2 h gave 4-(4-chlorophenyl)-1,2,3-thiadiazole as yellow solid (324 mg, 60%). <sup>1</sup>H NMR (500 MHz, CDCl<sub>3</sub>) δ 8.68 (s, 1H), 7.80 (dd, *J* = 17.8, 8.7 Hz, 2H), 7.47 (dd, *J* = 14.2, 7.4 Hz, 1H), 7.14 (t, *J* = 8.1 Hz, 1H). <sup>19</sup>F NMR (376 MHz, CDCl<sub>3</sub>) δ -111.8 (dd, *J* = 15.0, 8.8 Hz, 1F). <sup>13</sup>C NMR (126 MHz, CDCl<sub>3</sub>) δ 164.2, 162.2, 161.6 (d, *J* = 2.8 Hz), 132.8 (d, *J* = 8.3 Hz), 130.8 (d, *J* = 6.3 Hz), 123.0 (d, *J* = 2.9 Hz), 116.4 (d, *J* = 21.2 Hz), 114.4 (d, *J* = 23.3 Hz). Spectroscopic data match those previously reported in the literature.<sup>[5]</sup>

#### (Benzo[d][1,3]dioxol-5-yl)-1,2,3-thiadiazole (1eg)

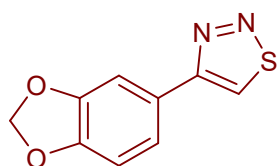

The general procedure A conducted with 1-(benzo[d][1,3]dioxol-5-yl)ethan-1-one (1.64 g, 10 mmol), *p*-toluenesulfonylhydrazide (1.86 g, 10 mmol) in dry MeOH (50 mL) gave *N*-tosylhydrazone as a white solid. A sealed tube was charged with *N*-tosylhydrazone (3 mmol), sulfur (480 mg, 15 mmol), TBAI (222 mg, 0.6 mmol), K<sub>2</sub>S<sub>2</sub>O<sub>8</sub> (1.62 g, 6 mmol) in DMAC (30 mL) under air at 100 °C for 2 h gave 4-(benzo[d][1,3]dioxol-5-yl)-1,2,3-thiadiazole as yellow solid (296 mg, 48%). <sup>1</sup>H NMR (500 MHz, CDCl<sub>3</sub>) δ 8.50 (s, 1H), 7.63 – 7.45 (m, 2H), 6.94 (d, *J* = 7.9 Hz, 1H), 6.05 (s, 2H). <sup>13</sup>C NMR (126 MHz, CDCl<sub>3</sub>) δ 162.6, 148.6, 148.4, 128.8, 125.0, 121.5, 108.9, 107.8, 101.5. Spectroscopic data match those previously reported in the literature.<sup>[1]</sup>

#### 4-(Benzofuran-2-yl)-1,2,3-thiadiazole (1eh)

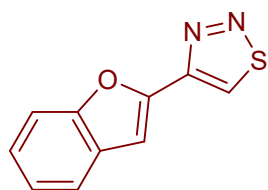

The general procedure C conducted the same as reported<sup>[6]</sup> with 1-(benzofuran-2-yl)ethan-1-one (1.6 g, 10 mmol), ethyl hydrazinecarboxylate (1.04 g, 1 equiv), one drop of HOAc in EtOH (20 mL) gave 2.44 g of ethyl (E)-2-(1-(benzofuran-2-

yl)ethylidene) hydrazine-1-carboxylate as a white solid. Dissolving 1.25g hydrazine in 0.4 mL SOCl<sub>2</sub> and 0.8 mL pyridine in 10 mL CHCl<sub>3</sub> at 55 °C for 5 min then add 0.6 mL SOCl<sub>2</sub> for 30 min to give the 1,2,3-thiadiazoles as yellow solid (751 mg, 73%). <sup>1</sup>H NMR (400 MHz, CDCl<sub>3</sub>) δ 8.80 (s, 1H), 7.69 (d, *J* = 7.7 Hz, 1H), 7.64 – 7.51 (m, 2H), 7.38 (t, *J* = 7.7 Hz, 1H), 7.31 (t, *J* = 7.4 Hz, 1H). <sup>13</sup>C NMR (126 MHz, CDCl<sub>3</sub>) δ 155.1, 154.6, 148.1, 130.5, 128.4, 125.5, 123.6, 122.0, 111.4, 105.8. HRMS (ESI-quadrupole) *m/z*: [M+H]<sup>+</sup> Calcd. for C<sub>10</sub>H<sub>7</sub>N<sub>2</sub>OS 203.0274; found: 203.0275.

#### 4-Cyclohexyl-1,2,3-thiadiazole (1ei)

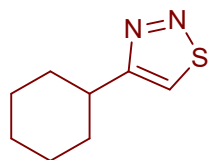

The general procedure B conducted with 1-cyclohexylethan-1-one (630 mg, 5 mmol), *p*-toluenesulfonylhydrazide (931 mg, 5 mmol) and potassiumthiocyanate (486 mg, 5 mmol), iodine (2.54 g, 10 mmol), CuCl<sub>2</sub> (335 mg, 2.5 mmol) in DMSO (15 mL) at 100 °C gave 4-cyclohexyl-1,2,3-thiadiazole as white solid (411 mg, 48%). <sup>1</sup>H NMR (400 MHz, CDCl<sub>3</sub>) δ 8.14 (s, 1H), 3.22 (t, *J* = 11.3 Hz, 1H), 2.17 (d, *J* = 12.4 Hz, 2H), 1.86 (d, *J* = 12.5 Hz, 2H), 1.77 (d, *J* = 12.5 Hz, 1H), 1.67 – 1.38 (m, 4H), 1.30 (dd, *J* = 25.0, 12.5 Hz, 1H). <sup>13</sup>C NMR (101 MHz, CDCl<sub>3</sub>) δ 169.5, 129.8, 38.0, 33.3, 26.2, 25.9. Spectroscopic data match those previously reported in the literature.<sup>[2]</sup>

#### 4-(Tert-butyl)-1,2,3-thiadiazole (1ej)

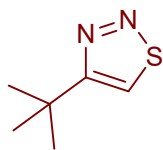

The general procedure B conducted with 3,3-dimethylbutan-2-one (500 mg, 5 mmol), *p*-toluenesulfonylhydrazide (931 mg, 5 mmol) and potassiumthiocyanate (486 mg, 5 mmol), iodine (2.54 g, 10 mmol), CuCl<sub>2</sub> (335 mg, 2.5 mmol) in DMSO (15 mL) at 100 °C gave 4-(tert-butyl)-1,2,3-thiadiazole as yellow oil (390 mg, 55%). <sup>1</sup>H NMR (400 MHz, CDCl<sub>3</sub>) δ 8.16 (s, 1H), 1.45 (s, 9H). <sup>13</sup>C NMR (101 MHz, CDCl<sub>3</sub>) δ 173.3, 129.1, 33.7, 30.6. Spectroscopic data match those previously reported in the literature.<sup>[2]</sup>

#### Ethyl 1,2,3-thiadiazole-4-carboxylate (1ek)

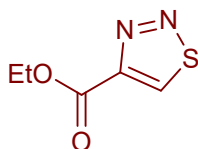

The general procedure C conducted the same as reported with

methyl hydrazinecarboxylate (0.9 g, 10 mmol, 1.0 equiv) ethyl pyruvate (1.1 mL, 10 mmol, 1.0 equiv) in ethanol (20 mL).<sup>[6]</sup> The reaction mixture was stirred at room temperature overnight and then concentrated in vacuo. The crude hydrazone was washed with ethanol, dried in the air and used for the next step. Hydrazone (10 mmol) in CH<sub>2</sub>Cl<sub>2</sub> (10 mL) was added SOCl<sub>2</sub> (3.6 mL, 50 mmol, 5.0 equiv) dropwise to afford 1,2,3-thiadiazole as white solid (751 mg, 73%). <sup>1</sup>H NMR (400 MHz, CDCl<sub>3</sub>) δ 9.29 (s, 1H), 4.52 (q, *J* = 7.1 Hz, 2H), 1.45 (t, *J* = 7.1 Hz, 3H). <sup>13</sup>C NMR (101 MHz, CDCl<sub>3</sub>) δ 159.6, 154.9, 142.5, 62.3, 14.3. Spectroscopic data match those previously reported in the literature.<sup>[7]</sup>

### 1,3-Di(1,2,3-thiadiazol-4-yl)benzene (1el)

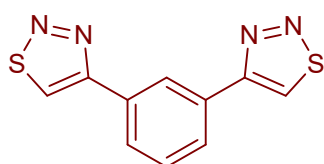

The general procedure B conducted with 1,1'-(1,3-phenylene)bis(ethan-1-one) (810 mg, 5 mmol), *p*-toluenesulfonylhydrazide (931 mg, 5 mmol) and potassiumthiocyanate (486 mg, 5 mmol), iodine (2.54 g, 10 mmol), CuCl<sub>2</sub> (335 mg, 2.5 mmol) in DMSO (15 mL) at 100 °C gave 1,3-di(1,2,3-thiadiazol-4-yl)benzene as white solid (265 mg, 22%). <sup>1</sup>H NMR (400 MHz, DMSO) δ 9.79 (s, 2H), 8.91 (s, 1H), 8.26 (d, *J* = 6.9 Hz, 2H), 7.75 (t, *J* = 7.1 Hz, 1H). <sup>13</sup>C NMR (101 MHz, DMSO) δ 161.8, 134.5, 132.1, 130.7, 128.4, 126.2. Spectroscopic data match those previously reported in the literature.<sup>[2]</sup>

### 4-([1,1'-Biphenyl]-4-yl)-1,2,3-thiadiazole (1em)

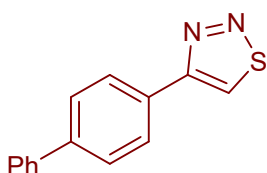

The general procedure C conducted with 1-([1,1'-biphenyl]-4-yl)ethan-1-one (1.96 g, 10 mmol), ethyl hydrazinecarboxylate (1.25 g, 1.2 equiv), one drop of concentrated hydrochloric acid in dry CHCl<sub>3</sub> (20 mL) gave 2.77 g of ethyl (*E*)-2-(1-([1,1'-biphenyl]-4-yl)ethylidene) hydrazine-1-carboxylate. Dissolving in excess SOCl<sub>2</sub> (10 mL) for 8 h to give 1,2,3-thiadiazoles as yellow solid (1.79 g, 75%). <sup>1</sup>H NMR (500 MHz, CDCl<sub>3</sub>) δ 8.67 (s, 1H), 8.13 (d, *J* = 8.4 Hz, 2H), 7.75 (d, *J* = 8.4 Hz, 2H), 7.70 – 7.63 (m, 2H), 7.48 (t, *J* = 7.6 Hz, 2H), 7.39 (t, *J* = 7.4 Hz, 1H). <sup>13</sup>C NMR (126 MHz,



CDCl<sub>3</sub>)  $\delta$  162.6, 142.2, 140.2, 129.9, 129.7, 128.9, 127.8, 127.8, 127.1. HRMS (ESI-quadrupole)  $m/z$ : [M+H]<sup>+</sup> Calcd. for C<sub>14</sub>H<sub>11</sub>N<sub>2</sub>S 239.0637; found: 239.0637.

#### 4-(4-(trifluoromethoxy)phenyl)-1,2,3-thiadiazole (1en)

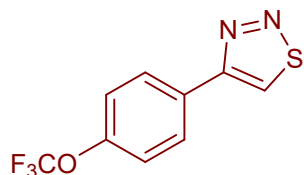

The general procedure C conducted with 1-(4-(trifluoromethoxy)phenyl)ethan-1-one (2.04 g, 10 mmol), ethyl hydrazinecarboxylate (1.25 g, 1.2 equiv), one drop of concentrated hydrochloric acid in dry CHCl<sub>3</sub> (20 mL) gave 2.74 g of ethyl (*E*)-2-(1-(4-(trifluoromethoxy)phenyl) ethylidene)hydrazine-1-carboxylate as a white solid. Dissolving in excess SOCl<sub>2</sub> (10 mL) for 8 h to give 1,2,3-thiadiazoles as yellow solid (2.02 g, 82%). <sup>1</sup>H NMR (500 MHz, CDCl<sub>3</sub>)  $\delta$  8.68 (s, 1H), 8.09 (d,  $J$  = 8.7 Hz, 2H), 7.36 (d,  $J$  = 8.3 Hz, 2H). <sup>19</sup>F NMR (471 MHz, CDCl<sub>3</sub>)  $\delta$  -57.78 (s, 3F). <sup>13</sup>C NMR (126 MHz, CDCl<sub>3</sub>)  $\delta$  161.5, 149.9, 130.5, 129.5, 128.9, 121.6, 120.5 (q,  $J$  = 257.6 Hz). HRMS (ESI-quadrupole)  $m/z$ : [M+H]<sup>+</sup> Calcd. for C<sub>9</sub>H<sub>6</sub>F<sub>3</sub>N<sub>2</sub>OS 247.0147; found: 247.0147.

#### 4-(4-(methylthio)phenyl)-1,2,3-thiadiazole (1eo)

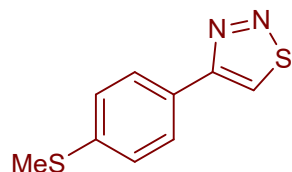

The general procedure A conducted with 1-(4-(methylthio)phenyl)ethan-1-one (0.83 g, 5 mmol), *p*-toluenesulfonylhydrazide (0.93 g, 5 mmol) in dry MeOH (10 mL) gave *N*-tosylhydrazone as a white solid. A sealed tube was charged with *N*-tosylhydrazone (3 mmol), sulfur (480 mg, 15 mmol), TBAI (222 mg, 0.6 mmol), K<sub>2</sub>S<sub>2</sub>O<sub>8</sub> (1.62 g, 6 mmol) in DMAC (30 mL) under air at 100 °C for 2 h gave 4-(4-(methylthio)phenyl)-1,2,3-thiadiazole as yellow solid (478 mg, 77%). <sup>1</sup>H NMR (500 MHz, CDCl<sub>3</sub>)  $\delta$  8.59 (s, 1H), 7.96 (d,  $J$  = 8.4 Hz, 2H), 7.36 (d,  $J$  = 8.4 Hz, 2H), 2.54 (s, 3H). <sup>13</sup>C NMR (126 MHz, CDCl<sub>3</sub>)  $\delta$  162.5, 140.6, 129.3, 127.7, 127.4, 126.6, 15.4. Spectroscopic data match those previously reported in the literature. [4]

#### 4-(4-(4,4,5,5-Tetramethyl-1,3,2-dioxaborolan-2-yl)phenyl)-1,2,3-thiadiazole (1ep)

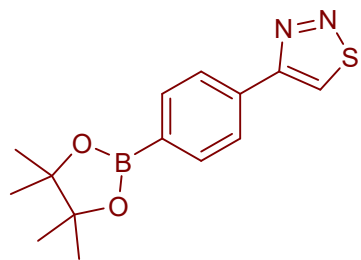

The general procedure C conducted with 1-(4-(4,4,5,5-tetramethyl-1,3,2-dioxaborolan-2-yl)phenyl)ethan-1-one (2.46 g, 10 mmol), ethyl hydrazinecarboxylate (1.25 g, 1.2 equiv), one drop of concentrated hydrochloric acid in dry  $\text{CHCl}_3$  (20 mL) gave 3.11 g of ethyl (*E*)-2-(1-(4-(4,4,5,5-tetramethyl-1,3,2-dioxaborolan-2-yl)phenyl)ethylidene)hydrazine-1-carboxylate as a white solid. Dissolving in excess  $\text{SOCl}_2$  (10 mL) for 8 h to give 1,2,3-thiadiazoles as yellow solid (1.47 g, 51%).  $^1\text{H}$  NMR (400 MHz,  $\text{CDCl}_3$ )  $\delta$  8.72 (s, 1H), 8.15 – 8.03 (m, 2H), 7.96 (d,  $J = 8.3$  Hz, 2H), 1.39 (s, 12H).  $^{13}\text{C}$  NMR (101 MHz,  $\text{CDCl}_3$ )  $\delta$  162.8, 135.6, 133.2, 130.6, 126.6, 84.1, 24.9. HRMS (ESI-quadrupole)  $m/z$ :  $[\text{M}]^+$  Calcd. for  $\text{C}_{14}\text{H}_{17}\text{BN}_2\text{O}_2\text{S}$  288.1104; found: 288.1215.

#### (4-(1,2,3-Thiadiazol-4-yl)phenyl)(morpholino)methanone (1eq)

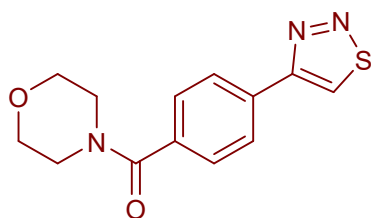

The general procedure C conducted with 1-(4-(morpholine-4-carbonyl)phenyl)ethan-1-one (2.33 g, 10 mmol), ethyl hydrazinecarboxylate (1.25 g, 1.2 equiv), one drop of concentrated hydrochloric acid in dry  $\text{CHCl}_3$  (20 mL) gave 2.77 g of ethyl (*E*)-2-(1-(4-(morpholine-4-carbonyl)phenyl)ethylidene)hydrazine-1-carboxylate as a white solid. Dissolving in excess  $\text{SOCl}_2$  (10 mL) for 8 h to give 1,2,3-thiadiazoles as yellow solid (1.62 g, 59%).  $^1\text{H}$  NMR (500 MHz,  $\text{CDCl}_3$ )  $\delta$  8.75 (s, 1H), 8.11 (d,  $J = 8.1$  Hz, 2H), 7.56 (d,  $J = 8.1$  Hz, 2H), 4.44 – 3.18 (m, 8H).  $^{13}\text{C}$  NMR (126 MHz,  $\text{CDCl}_3$ )  $\delta$  169.7, 161.8, 136.1, 132.3, 131.0, 128.1, 127.6, 66.9. HRMS (ESI-quadrupole)  $m/z$ :  $[\text{M}+\text{H}]^+$  Calcd. for  $\text{C}_{13}\text{H}_{14}\text{N}_3\text{O}_2\text{S}$  276.0801; found: 276.0803.

#### Morpholino(1,2,3-thiadiazol-4-yl)methanone (1er)

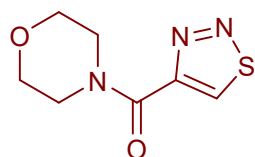

The general procedure C conducted with 1-morpholinopropane-1,2-dione (1.57 g, 10 mmol), ethyl hydrazinecarboxylate (1.25 g, 1.2 equiv), one drop of concentrated hydrochloric acid in dry

CHCl<sub>3</sub> (20 mL) gave 2.13 g of ethyl (*E*)-2-(1-morpholino-1-oxopropan-2-ylidene)hydrazine-1-carboxylate as a white solid. Dissolving in excess SOCl<sub>2</sub> (10 mL) for 8 h to give 1,2,3-thiadiazoles as yellow solid (1.25 g, 63%). <sup>1</sup>H NMR (400 MHz, CDCl<sub>3</sub>) δ 9.19 (s, 1H), 4.13 – 4.01 (m, 2H), 3.98 – 3.73 (m, 6H). <sup>13</sup>C NMR (126 MHz, CDCl<sub>3</sub>) δ 159.6, 158.1, 142.1, 67.1, 66.8, 48.0, 43.4. HRMS (ESI-quadrupole) *m/z*: [M+H]<sup>+</sup> Calcd. for C<sub>7</sub>H<sub>10</sub>N<sub>3</sub>O<sub>2</sub>S 200.0488; found: 200.0486.

#### 4-(1,2,3-Thiadiazol-4-yl)phenol (1et)

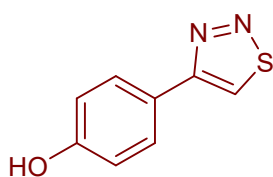

A modified procedure C conducted with 1-(4-hydroxyphenyl)ethan-1-one (2.05 g, 15 mmol), ethyl hydrazinecarboxylate (1.72 g, 1.1 equiv), *p*-TsOH (140 mg, 0.8 mmol) in dry toluene (50 mL) in dean-stark equipment gave 3.64 g of ethyl 2-(1-(4-hydroxyphenyl)ethylidene)hydrazine-1-carboxylate as a white solid. Dissolving in excess SOCl<sub>2</sub> (10 mL) for 8 h to give 1,2,3-thiadiazoles as yellow solid (2.16 g, 81%). <sup>1</sup>H NMR (500 MHz, DMSO) δ 9.88 (s, 1H), 9.37 (s, 1H), 7.98 – 7.93 (m, 2H), 6.95 – 6.91 (m, 2H). <sup>13</sup>C NMR (126 MHz, DMSO) δ 162.7, 158.9, 131.1, 129.1, 122.3, 116.4. Spectroscopic data match those previously reported in the literature.<sup>[4]</sup>

#### 4-(thiophen-2-yl)-1,2,3-thiadiazole (1eu)

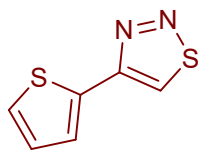

The general procedure A conducted with 1-(thiophen-2-yl)ethan-1-one (0.63 g, 5 mmol), *p*-toluenesulfonylhydrazide (0.93 g, 5 mmol) in dry MeOH (10 mL) gave *N*-tosylhydrazone as a white solid. A sealed tube was charged with *N*-tosylhydrazone (3 mmol), sulfur (480 mg, 15 mmol), TBAI (222 mg, 0.6 mmol), K<sub>2</sub>S<sub>2</sub>O<sub>8</sub> (1.62 g, 6 mmol) in DMAC (30 mL) under air at 100 °C for 2 h gave 4-(thiophen-2-yl)-1,2,3-thiadiazole as brown solid (470 mg, 56%). <sup>1</sup>H NMR (500 MHz, CDCl<sub>3</sub>) δ 8.52 (s, 1H), 8.00–7.90 (m, 1H), 7.60 (dd, *J* = 5.0, 0.9 Hz, 1H), 7.43 (dd, *J* = 4.9, 3.0 Hz, 1H). <sup>13</sup>C NMR (126 MHz, CDCl<sub>3</sub>) δ 158.4, 132.2, 129.5, 127.0, 126.5, 124.2. Spectroscopic data match those previously reported in the literature.<sup>[1]</sup>

#### 4-(pyridin-2-yl)-1,2,3-thiadiazole (1ew)

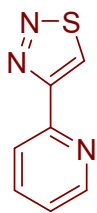

A modified procedure C conducted with 1-(pyridin-2-yl)ethan-1-one (1.21 g, 10 mmol), ethyl hydrazinecarboxylate (1.04 g, 1 equiv), CH<sub>3</sub>COOH (four drop as catalyst) in MeOH (8 mL) to give ethyl (*E*)-2-(1-(pyridin-2-yl)ethylidene)hydrazine-1-carboxylate as a white solid. Dissolving in excess SOCl<sub>2</sub> (10 mL) at 0 °C and heated at 60 °C for 1 h. The remaining thionyl chloride was evaporated under vacuum. The mixture was washed with aq. Na<sub>2</sub>CO<sub>3</sub> and extracted by ethyl acetate and then concentrated in vacuum, and the residue was purified by preparative TLC to afford the desired product as white solid (1.01 g, 62%). <sup>1</sup>H NMR (500 MHz, CDCl<sub>3</sub>) δ 9.16 (s, 1H), 8.60 (d, *J* = 4.5 Hz, 1H), 8.38 (d, *J* = 7.9 Hz, 1H), 7.79 (td, *J* = 7.7, 1.5 Hz, 1H), 7.26 (dd, *J* = 7.0, 5.2 Hz, 1H). <sup>13</sup>C NMR (126 MHz, CDCl<sub>3</sub>) δ 163.4, 149.9, 149.8, 137.3, 133.9, 123.9, 122.5. Spectroscopic data match those previously reported in the literature.<sup>[1]</sup>

#### 4-(6-methoxypyridin-3-yl)-1,2,3-thiadiazole (1ex)

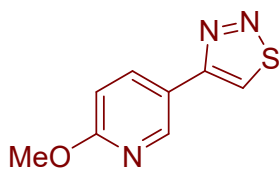

A modified procedure C conducted with 1-(6-methoxypyridin-3-yl)ethan-1-one (755 mg, 5 mmol), ethyl hydrazinecarboxylate (520 mg, 1 equiv), CH<sub>3</sub>COOH (2 drop as catalyst) in MeOH (4 mL) to give 5-(((*E*)-1-(((ethylperoxy)-13-methylene)hydrazineylidene)ethyl)-2-methoxypyridine as a white solid. Dissolving in excess SOCl<sub>2</sub> (5 mL) at 0 °C and heated at 60 °C for 1 h. The remaining thionyl chloride was evaporated under vacuum. The mixture was washed with aq. Na<sub>2</sub>CO<sub>3</sub> and extracted by ethyl acetate and then concentrated in vacuum, and the residue was purified by preparative TLC to afford the desired product as white solid (714 mg, 74%). <sup>1</sup>H NMR (500 MHz, CDCl<sub>3</sub>) δ 8.81 (d, *J* = 2.1 Hz, 1H), 8.60 (s, 1H), 8.26 (dd, *J* = 8.6, 2.4 Hz, 1H), 6.89 (d, *J* = 8.6 Hz, 1H), 4.01 (s, 3H). <sup>13</sup>C NMR (126 MHz, CDCl<sub>3</sub>) δ 164.7, 160.1, 145.9, 137.6, 129.0, 120.6, 111.4, 53.8. HRMS (ESI-quadrupole) *m/z*: [M+H]<sup>+</sup> Calcd. for C<sub>8</sub>H<sub>8</sub>N<sub>3</sub>OS 194.0382; found: 194.0383.

#### 4-(5-bromopyridin-3-yl)-1,2,3-thiadiazole (1ey)

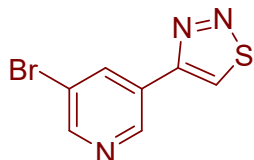

A modified procedure C conducted with 1-(5-bromopyridin-3-

yl)ethan-1-one (1 g, 5 mmol), ethyl hydrazinecarboxylate (520 mg, 1 equiv), CH<sub>3</sub>COOH (2 drop as catalyst) in MeOH (4 mL) to give 3-bromo-5-((1*E*)-1-(((ethylperoxy)-1,3-methylene)hydrazineylidene)ethyl)pyridine as a white solid. Dissolving in excess SOCl<sub>2</sub> (5 mL) at 0 °C and heated at 60 °C for 1 h. The remaining thionyl chloride was evaporated under vacuum. The mixture was washed with aq. Na<sub>2</sub>CO<sub>3</sub> and extracted by ethyl acetate and then concentrated in vacuum, and the residue was purified by preparative TLC to afford the desired product as yellow solid (971 mg, 81%). <sup>1</sup>H NMR (500 MHz, CDCl<sub>3</sub>) δ 9.14 (d, *J* = 1.2 Hz, 1H), 8.81 (s, 1H), 8.74 (d, *J* = 1.8 Hz, 1H), 8.57 (s, 1H). <sup>13</sup>C NMR (126 MHz, CDCl<sub>3</sub>) δ 158.2, 151.4, 146.3, 137.1, 131.8, 128.3, 121.3. HRMS (ESI-quadrupole) *m/z*: [M+H]<sup>+</sup> Calcd. for C<sub>7</sub>H<sub>5</sub>N<sub>3</sub>BrS 241.9382; found: 241.9381.

#### 4-(pyridin-4-yl)-1,2,3-thiadiazole (1ez)

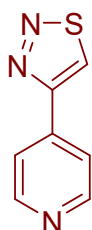

A modified procedure C conducted with 1-(pyridin-4-yl)ethan-1-one (1.21 g, 10 mmol), ethyl hydrazinecarboxylate (1.04 g, 1 equiv), CH<sub>3</sub>COOH (four drop as catalyst) in MeOH (8 mL) to give ethyl (*E*)-2-(1-(pyridin-4-yl)ethylidene)hydrazine-1-carboxylate as a white solid. Dissolving in excess SOCl<sub>2</sub> (10 mL) at 0 °C and heated at 60 °C for 1 h. The remaining thionyl chloride was evaporated under vacuum. The mixture was washed with aq. Na<sub>2</sub>CO<sub>3</sub> and extracted by ethyl acetate and then concentrated in vacuum, and the residue was purified by preparative TLC to afford the desired product as white solid (1.18 g, 72%). <sup>1</sup>H NMR (500 MHz, CDCl<sub>3</sub>) δ 8.88 (s, 1H), 8.78 (d, *J* = 5.9 Hz, 2H), 7.95 (d, *J* = 6.0 Hz, 2H). <sup>13</sup>C NMR (126 MHz, CDCl<sub>3</sub>) δ 160.3, 150.9, 137.8, 132.7, 121.4. Spectroscopic data match those previously reported in the literature.<sup>[1]</sup>

#### 4-(3-methylpyrazin-2-yl)-1,2,3-thiadiazole (1eza)

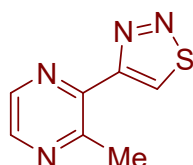

A modified procedure C conducted with 1-(3-methylpyrazin-2-yl)ethan-1-one (0.68 g, 5 mmol), ethyl hydrazinecarboxylate (520 mg, 1 equiv), CH<sub>3</sub>COOH (2 drop as catalyst) in MeOH (4 mL) to give 2-((1*E*)-1-(((ethylperoxy)-1,3-methylene)hydrazineylidene)ethyl)-3-methylpyrazine as a white solid. Dissolving in excess SOCl<sub>2</sub> (5 mL) at 0 °C and

heated at 60 °C for 1 h. The remaining thionyl chloride was evaporated under vacuum. The mixture was washed with aq. Na<sub>2</sub>CO<sub>3</sub> and extracted by ethyl acetate and then concentrated in vacuum, and the residue was purified by preparative TLC to afford the desired product as yellow solid (511 mg, 57%). <sup>1</sup>H NMR (500 MHz, CDCl<sub>3</sub>) δ 9.16 (s, 1H), 8.44 (d, *J* = 14.3 Hz, 2H), 2.94 (s, 3H). <sup>13</sup>C NMR (126 MHz, CDCl<sub>3</sub>) δ 162.2, 153.2, 144.3, 143.5, 141.5, 137.5, 24.1. HRMS (ESI-quadrupole) *m/z*: [M+H]<sup>+</sup> Calcd. for C<sub>7</sub>H<sub>7</sub>N<sub>4</sub>S 179.0386; found: 179.0385.

#### 4-(1H-pyrrolo[2,3-*b*]pyridin-3-yl)-1,2,3-thiadiazole (1ezb)

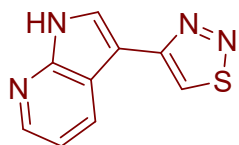

A modified procedure C conducted with 1-(1H-pyrrolo[2,3-*b*]pyridin-3-yl)ethan-1-one (0.32 g, 2 mmol), ethyl hydrazinecarboxylate (208 mg, 1 equiv), CH<sub>3</sub>COOH (2 drop as catalyst) in MeOH (4 mL) to give ethyl (*E*)-2-(1-(1H-pyrrolo[2,3-*b*]pyridin-3-yl)ethylidene)hydrazine-1-carboxylate as a white solid. Dissolving in excess SOCl<sub>2</sub> (5 mL) at 0 °C and heated at 60 °C for 1 h. The remaining thionyl chloride was evaporated under vacuum. The mixture was washed with aq. Na<sub>2</sub>CO<sub>3</sub> and extracted by ethyl acetate and then concentrated in vacuum, and the residue was purified by preparative TLC to afford the desired product as yellow solid (254 mg, 63%). <sup>1</sup>H NMR (500 MHz, DMSO) δ 12.19 (s, 1H), 9.41 (s, 1H), 8.57 (d, *J* = 7.6 Hz, 1H), 8.35 (d, *J* = 4.0 Hz, 1H), 8.30 (d, *J* = 2.4 Hz, 1H), 7.25 (dd, *J* = 7.9, 4.6 Hz, 1H). <sup>13</sup>C NMR (126 MHz, DMSO) δ 158.1, 149.2, 144.1, 129.6, 129.0, 126.6, 117.5, 117.1, 106.1. HRMS (ESI-quadrupole) *m/z*: [M+H]<sup>+</sup> Calcd. for C<sub>9</sub>H<sub>7</sub>N<sub>4</sub>S 203.0386; found: 203.0385.

## IV Methods for the Synthesis of Amine Substrates

### Methods for the Synthesis of Amino Acid Methyl Esters

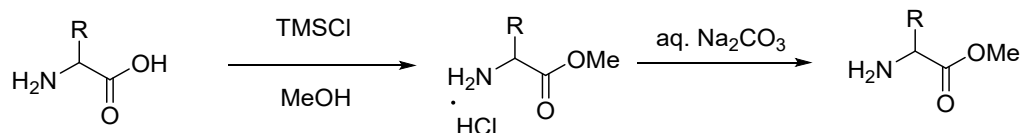

Amino acid methyl esters were synthesized following the reported procedure.<sup>[8]</sup> Amino acid (10 mmol) was taken in a round bottom flask. Freshly distilled chlorotrimethylsilane (20 mmol) was added slowly and stirred with a magnetic stirrer. Then methanol (10 mL) was added and the resulting solution or suspension was stirred at room temperature. After the completion of reaction (as monitored by TLC), the reaction mixture was concentrated on a rotary evaporator to give the product amino acid ester hydrochloride.

The amino acid ester hydrochloride salt (5 mmol) was introduced into a separatory funnel and mixed with  $\text{CH}_2\text{Cl}_2$  (20 mL). An aqueous solution saturated with  $\text{Na}_2\text{CO}_3$  was added and the solution was vigorously shaken for few minutes and extracted with  $\text{CH}_2\text{Cl}_2$  (3 x 20 mL). The organic layers were collected, dried over anhydrous  $\text{MgSO}_4$ , filtered and evaporated under reduced pressure to provide the pure amino acid ester amines in quantitative yields.

### BocHN-D-Ala-Thiazole-Thiazole-Thiazole-OEt

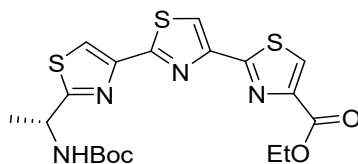

BocHN-D-Ala-Thiazole-Thiazole-Thiazole-OEt was supported by Dr. Y. Q. Zhang, which is synthesized following the reported procedure.<sup>[10]</sup>

### Peptide coupling.

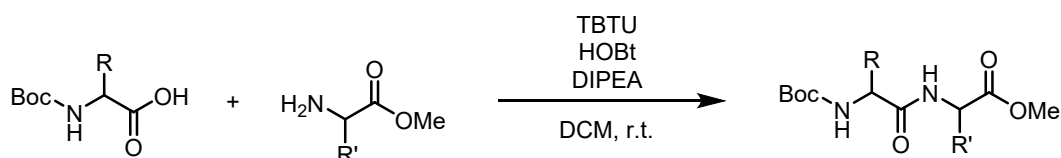

Peptides were synthesized according to the reported literature.<sup>[11]</sup> Boc-protected amino acid, TBTU, HOBt and DIPEA were added to DCM and stirred at room temperature. After 1 h, *N*-unprotected amino acid was added to the reaction mixture and stirring was continued overnight (approximately 15 h). The reaction mixture was then washed with NaHCO<sub>3</sub> (sat., aq.), citric acid (10 %, aq.) and NaCl (sat., aq.), dried over Na<sub>2</sub>SO<sub>4</sub>, filtered, evaporated in vacuum and purified by automated flash chromatography on a prepacked silica column.

### The synthesis of amino-alkaloids derivatives

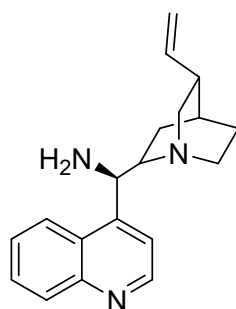

Amino-alkaloids derivatives were synthesized according to the reported literature.<sup>[12]</sup> Cinchona alkaloid (1 mmol, 1.0 eq) and triphenylphosphine (1.2 mmol, 1.2 eq) were dissolved in dry THF (7 mL); then the resulting solution was cooled to 0 °C stirred for 10 min. Subsequently the Diisopropyl azodicarboxylate (DIAD) (1.2 mmol, 1.2 eq) was added dropwise, followed by the slow addition of the solution of (PhO)<sub>2</sub>P(O)N<sub>3</sub> (1.2 mmol, 1.2 eq, 0.57 M solution in dry THF). Then the mixture was allowed to warm to room temperature and stirred for 8 h. The solution was then heated to 60 °C for 3 h; after this time, triphenylphosphine (1.2 mmol, 1.2 eq) was added as 0.46 M solution in dry THF. Then the reaction was stirred at 50 °C for 3 h, cooled to room temperature and 700 µL of distilled H<sub>2</sub>O were added; finally, the reaction mixture was stirred for further 18 h. Then the solvent was removed under reduced pressure and 40 mL of CH<sub>2</sub>Cl<sub>2</sub> and 40 mL of HCl 10% were added to the dried crude product. The organic layer was separated and the aqueous phase was extracted with CH<sub>2</sub>Cl<sub>2</sub> (3 x 30 mL). The aqueous layer was then basified until pH = 12 with NH<sub>4</sub>OH 30-33% and subsequently extracted with CH<sub>2</sub>Cl<sub>2</sub> (3 x 30 mL). The



combined organic solution was dried over dry  $\text{Na}_2\text{SO}_4$ , filtered and the solvent was removed under reduced pressure. The crude product was purified by chromatographic purification.

### The synthesis of 1-((4-(tert-butyl)phenyl)sulfonyl)piperazine

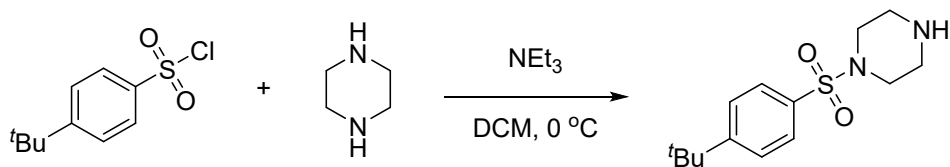

1-((4-(tert-butyl)phenyl)sulfonyl)piperazine was synthesized by adding triethylamine (31.5 mmol) slowly to a solution of piperazine in CH<sub>2</sub>Cl<sub>2</sub> at 0 °C, and then commercially available 4-(tert-butyl)benzenesulfonyl chloride (11.4 mmol) was added and stirred for 30 min. After the completion of reaction, which was confirmed by TLC (petroleum ether and ethyl acetate (2:1)), the reaction was quenched with water and extracted with CH<sub>2</sub>Cl<sub>2</sub>. The organic layer was dried over anhydrous Na<sub>2</sub>SO<sub>4</sub> and concentrated on reduced pressure to give the desired product.<sup>[22]</sup>

### Aromatic amine derivatives

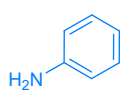

2aa

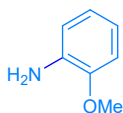

2ab

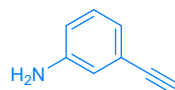

2ac

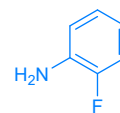

2ad

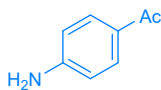

2ae

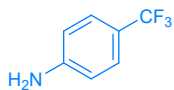

2af

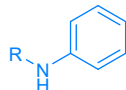

2ag, R = Me  
2ah, R = Et  
2ai, R = *i*Pr  
2aj, R = Bn

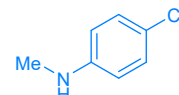

2ak

### Aliphatic amine derivatives

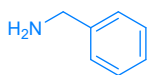

2ba

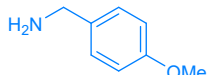

2bb

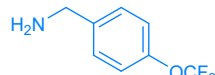

2bc

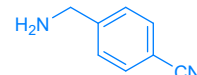

2bd

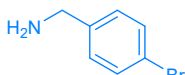

2be

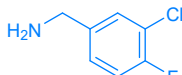

2bf

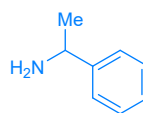

2bg

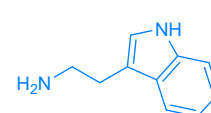

2bh

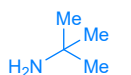

2bi

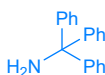

2bj

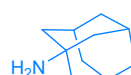

2bk

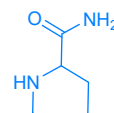

2bl

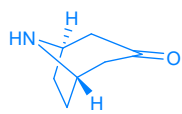

2bm

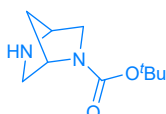

2bn

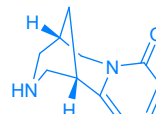

2bo

### Late-stage modification of drugs and peptides

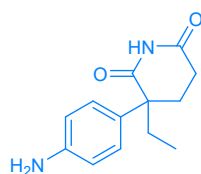

Aminoglutethimide derivative

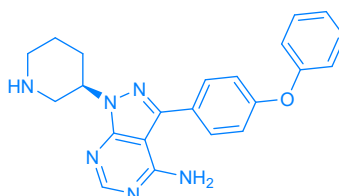

Ibrutinib intermediate

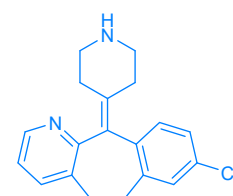

Desloratadine derivative

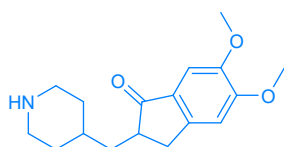

Donepezil analogue

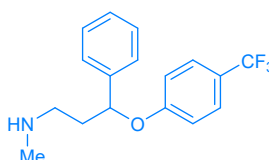

Fluoxetine derivative

All the amines above were purchased and used directly.

## V. General Procedures for Cu(OAc)<sub>2</sub>-Catalysed Thioamidation of

### 5*H*-1,2,3-Thiadiazoles with Amines

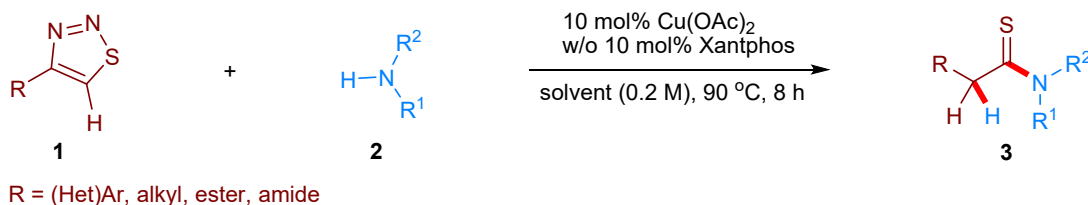

#### General procedure A for the synthesis of thioamides

A sealed tube was charged with 1,2,3-thiadiazoles **1** (0.5 mmol), Cu(OAc)<sub>2</sub> (9 mg, 0.05 mmol), Xantphos (28 mg, 0.05 mmol) and aniline derivatives **2** (0.5 mmol) at room temperature, then DMF (2.5 mL) was added. The resulting mixture was stirred at 90 °C for 8 h. After the reaction completed, the mixture was quenched with saturation NaCl solution (20 mL), extracted with EtOAc (3 × 20 mL). The combined organic layers were washed with brine, dried over anhydrous Na<sub>2</sub>SO<sub>4</sub> and concentrated under reduced pressure. The residue was purified by column chromatography on silica gel (petroleum ether/EtOAc = 20:1 - 5:1) to yield the desired thioamide product.

#### General procedure B for the synthesis of thioamides

A sealed tube was charged with 1,2,3-thiadiazoles (0.5 mmol), Cu(OAc)<sub>2</sub> (9 mg, 0.05 mmol), Xantphos (28 mg, 0.05 mmol) and primary alkylamine (0.5 mmol) at room temperature, then THF (2.5 mL) was added. The resulting mixture was stirred at 90 °C for 8 h. After the reaction completed, the mixture was quenched with saturation NaCl solution (20 mL), extracted with EtOAc (3 × 20 mL). The combined organic layers were washed with brine, dried over anhydrous Na<sub>2</sub>SO<sub>4</sub> and concentrated under reduced pressure. The residue was purified by column chromatography on silica gel (petroleum ether/EtOAc = 20:1 - 5:1) to yield the desired thioamide product.

#### General procedure C for the synthesis of thioamides

A sealed tube was charged with 1,2,3-thiadiazoles (0.5 mmol), Cu(OAc)<sub>2</sub> (9 mg, 0.05 mmol), Xantphos (28 mg, 0.05 mmol) and secondary alkylamine (0.5 mmol) at

room temperature, then 1,4-dioxane (2.5 mL) was added. The resulting mixture was stirred at 90 °C for 8 h. After the reaction completed, the mixture was quenched with saturation NaCl solution (20 mL), extracted with EtOAc (3 × 20 mL). The combined organic layers were washed with brine, dried over anhydrous Na<sub>2</sub>SO<sub>4</sub> and concentrated under reduced pressure. The residue was purified by column chromatography on silica gel (petroleum ether/EtOAc = 20:1 - 5:1) to yield the desired thioamide product.

#### **General procedure D for the synthesis of thioamides**

A sealed tube was charged with 1,2,3-thiadiazoles (0.5 mmol), Cu(OAc)<sub>2</sub> (9 mg, 0.05 mmol) and N-alkylaniline (0.5 mmol) at room temperature, then CH<sub>3</sub>CN (2.5 mL) was added. The resulting mixture was stirred at 90 °C for 8 h. After the reaction completed, the mixture was quenched with saturation NaCl solution (20 mL), extracted with EtOAc (3 × 20 mL). The combined organic layers were washed with brine, dried over anhydrous Na<sub>2</sub>SO<sub>4</sub> and concentrated under reduced pressure. The residue was purified by column chromatography on silica gel (petroleum ether/EtOAc = 20:1 - 5:1) to yield the desired thioamide product.

## VI. Analysis Data for the Products

### *N*,2-diphenylethanethioamide (3aa)

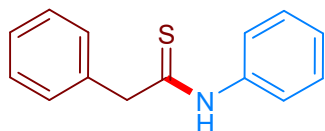

The general procedure A conducted with 4-phenyl-1,2,3-thiadiazole (81 mg, 0.5 mmol), Cu(OAc)<sub>2</sub> (9 mg, 0.05 mmol), Xantphos (28 mg, 0.05 mmol) and aniline (47 mg, 0.5 mmol) in DMF (2.5 mL) at 90 °C for 8 h gave *N*,2-diphenylethanethioamide as yellow oil (102 mg, 90%). <sup>1</sup>H NMR (500 MHz, CDCl<sub>3</sub>) δ 8.57 (s, 1H), 7.54 (d, *J* = 7.9 Hz, 2H), 7.46 – 7.38 (m, 2H), 7.34 (dd, *J* = 13.0, 6.4 Hz, 5H), 7.22 (t, *J* = 7.4 Hz, 1H), 4.25 (s, 2H). <sup>13</sup>C NMR (126 MHz, CDCl<sub>3</sub>) δ 201.3, 138.5, 135.0, 129.6, 129.5, 128.9, 128.1, 127.1, 123.7, 54.9. Spectroscopic data match those previously reported in the literature.<sup>[13]</sup>

### *N*-(2-methoxyphenyl)-2-phenylethanethioamide (3ab)

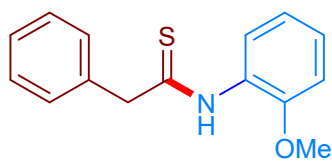

The general procedure A conducted with 4-phenyl-1,2,3-thiadiazole (81 mg, 0.5 mmol), Cu(OAc)<sub>2</sub> (9 mg, 0.05 mmol), Xantphos (28 mg, 0.05 mmol) and 2-methoxyaniline (62 mg, 0.5 mmol) in DMF (2.5 mL) at 90 °C for 8 h gave *N*-(2-methoxyphenyl)-2-phenylethanethioamide as yellow solid (110 mg, 85%). <sup>1</sup>H NMR (500 MHz, CDCl<sub>3</sub>) δ 9.16 (s, 1H), 9.03 (d, *J* = 8.1 Hz, 1H), 7.46 – 7.39 (m, 2H), 7.36 (t, *J* = 6.9 Hz, 3H), 7.12 (t, *J* = 7.8 Hz, 1H), 6.95 (t, *J* = 7.8 Hz, 1H), 6.81 (d, *J* = 8.2 Hz, 1H), 4.27 (s, 2H), 3.64 (s, 3H). <sup>13</sup>C NMR (126 MHz, CDCl<sub>3</sub>) δ 198.9, 149.7, 134.9, 129.9, 129.2, 128.3, 127.9, 126.5, 121.4, 120.3, 110.4, 56.0, 55.8. HRMS (ESI-quadrupole) *m/z*: [M+H]<sup>+</sup> Calcd. for C<sub>15</sub>H<sub>16</sub>NOS 258.0947; found: 258.0945.

### *N*-(3-ethynylphenyl)-2-phenylethanethioamide (3ac)

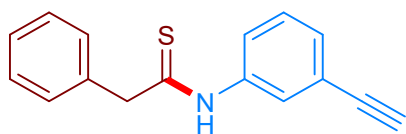

The general procedure A conducted with 4-phenyl-1,2,3-thiadiazole (81 mg, 0.5 mmol), Cu(OAc)<sub>2</sub> (9 mg, 0.05 mmol), Xantphos (28 mg, 0.05 mmol) and

3-ethynylaniline (58 mg, 0.5 mmol) in DMF (2.5 mL) at 90 °C for 8 h gave *N*-(3-ethynylphenyl)-2-phenylethanethioamide as yellow solid (116 mg, 92%). <sup>1</sup>H NMR (500 MHz, CDCl<sub>3</sub>) δ 8.65 (s, 1H), 7.59 (d, *J* = 10.4 Hz, 2H), 7.39 (t, *J* = 7.0 Hz, 2H), 7.33 (t, *J* = 8.0 Hz, 4H), 7.25 (t, *J* = 7.7 Hz, 1H), 4.20 (s, 2H), 3.07 (s, 1H). <sup>13</sup>C NMR (126 MHz, CDCl<sub>3</sub>) δ 201.9, 138.5, 135.0, 130.6, 129.5, 129.5, 128.9, 128.1, 127.2, 124.4, 122.9, 82.7, 78.4, 54.8. HRMS (ESI-quadrupole) *m/z*: [M+H]<sup>+</sup> Calcd. for C<sub>16</sub>H<sub>14</sub>NS 252.0841; found: 252.0839.

### *N*-(2-fluorophenyl)-2-phenylethanethioamide (3ad)

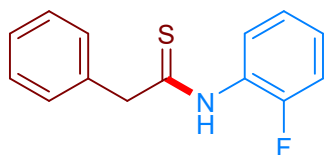

The general procedure A conducted with 4-phenyl-1,2,3-thiadiazole (81 mg, 0.5 mmol), Cu(OAc)<sub>2</sub> (9 mg, 0.05 mmol), Xantphos (28 mg, 0.05 mmol) and 2-fluoroaniline (56 mg, 0.5 mmol) in DMF (2.5 mL) at 90 °C for 8 h gave *N*-(3-ethynylphenyl)-2-phenylethanethioamide as yellow solid (87 mg, 71%). <sup>1</sup>H NMR (500 MHz, CDCl<sub>3</sub>) δ 8.57 (s, 1H), 8.46 (t, *J* = 7.8 Hz, 1H), 7.48 – 7.39 (m, 2H), 7.36 (d, *J* = 6.7 Hz, 3H), 7.15 (dt, *J* = 15.2, 7.0 Hz, 2H), 7.10 – 7.02 (m, 1H), 4.28 (s, 2H). <sup>19</sup>F NMR (471 MHz, CDCl<sub>3</sub>) δ -126.72 (d, *J* = 12.9 Hz, 1F). <sup>13</sup>C NMR (126 MHz, CDCl<sub>3</sub>) δ 201.8, 154.5 (d, *J* = 247.5 Hz), 134.7, 129.6, 129.5, 128.2, 127.7 (d, *J* = 8.1 Hz), 126.8 (d, *J* = 10.2 Hz), 124.8, 124.0 (d, *J* = 3.7 Hz), 115.4 (d, *J* = 19.3 Hz), 55.2. HRMS (ESI-quadrupole) *m/z*: [M+H]<sup>+</sup> Calcd. for C<sub>14</sub>H<sub>13</sub>NFS 246.0747; found: 246.0745.

### *N*-(4-acetylphenyl)-2-phenylethanethioamide (3ae)

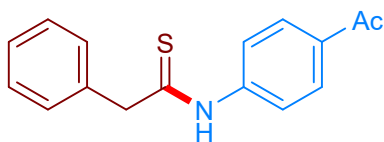

The general procedure A conducted with 4-phenyl-1,2,3-thiadiazole (81 mg, 0.5 mmol), Cu(OAc)<sub>2</sub> (9 mg, 0.05 mmol), Xantphos (28 mg, 0.05 mmol) and 1-(4-aminophenyl)ethan-1-one (68 mg, 0.5 mmol) in DMF (2.5 mL) at 90 °C for 8 h gave *N*-(4-acetylphenyl)-2-phenylethanethioamide as yellow solid (78 mg, 58%). <sup>1</sup>H NMR (500 MHz, CDCl<sub>3</sub>) δ 8.83 (s, 1H), 7.93 (d, *J* = 8.5 Hz, 2H), 7.78 (d, *J* = 8.5 Hz, 2H), 7.42 (d, *J* = 6.9 Hz, 2H), 7.37 (d, *J* = 7.3 Hz, 3H), 4.27 (s, 2H), 2.56 (s, 3H). <sup>13</sup>C NMR (126 MHz, CDCl<sub>3</sub>) δ 201.8, 197.0, 142.6, 134.9, 134.8, 129.5, 129.5, 129.3, 128.2,

122.6, 55.5, 26.6. HRMS (ESI-quadrupole)  $m/z$ :  $[M+H]^+$  Calcd. for  $C_{16}H_{16}NOS$  270.0947; found: 270.0944.

### 2-Phenyl-*N*-(4-(trifluoromethyl)phenyl)ethanethioamide (3af)

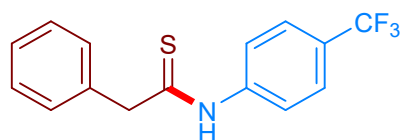

The general procedure A conducted with 4-phenyl-1,2,3-thiadiazole (81 mg, 0.5 mmol),  $Cu(OAc)_2$  (9 mg, 0.05 mmol), Xantphos (28 mg, 0.05 mmol) and 4-Aminobenzotrifluoride (81 mg, 0.5 mmol) in DMF (2.5 mL) at 90 °C for 8 h gave 2-phenyl-*N*-(4-(trifluoromethyl) phenyl)ethanethioamide as yellow solid (96 mg, 65%).  $^1H$  NMR (400 MHz,  $CDCl_3$ )  $\delta$  8.68 (s, 1H), 7.77 (d,  $J = 8.3$  Hz, 2H), 7.61 (d,  $J = 8.3$  Hz, 2H), 7.54 – 7.44 (m, 2H), 7.40 (t,  $J = 9.0$  Hz, 3H), 4.30 (s, 2H).  $^{19}F$  NMR (376 MHz,  $CDCl_3$ )  $\delta$  - 62.41 (s, 3F).  $^{13}C$  NMR (101 MHz,  $CDCl_3$ )  $\delta$  202.1, 141.4, 134.7, 129.6, 128.7, 128.4, 128.3, 126.1 (dd,  $J = 7.4, 3.7$  Hz), 123.8 (q,  $J = 271.8$  Hz), 123.3, 55.2. HRMS (ESI-quadrupole)  $m/z$ :  $[M+H]^+$  Calcd. for  $C_{15}H_{13}NF_3S$  296.0715; found: 296.0712.

### *N*-methyl-*N*,2-diphenylethanethioamide (3ag)

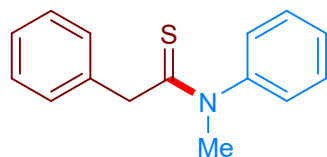

The modified procedure D conducted with 4-phenyl-1,2,3-thiadiazole (810 mg, 5 mmol),  $Cu(OAc)_2$  (90 mg, 0.5 mmol) and *N*-methylaniline (540 mg, 5 mmol) in  $CH_3CN$  (25 mL) at 90 °C for 48 h gave *N*-methyl-*N*,2-diphenylethanethioamide as yellow oil (1.01 g, 84%).  $^1H$  NMR (500 MHz,  $CDCl_3$ )  $\delta$  7.44 – 7.31 (m, 3H), 7.24 – 7.13 (m, 3H), 6.99 (dt,  $J = 5.4, 4.2$  Hz, 4H), 4.02 (s, 2H), 3.72 (s, 3H).  $^{13}C$  NMR (126 MHz,  $CDCl_3$ )  $\delta$  202.8, 145.4, 136.7, 129.7, 128.7, 128.5, 128.1, 126.7, 126.0, 50.8, 46.3. Spectroscopic data match those previously reported in the literature.<sup>[13]</sup>

### *N*-ethyl-*N*,2-diphenylethanethioamide (3ah)

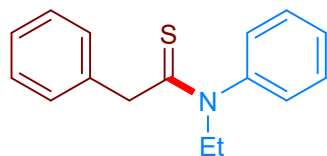

The general procedure D conducted with 4-phenyl-1,2,3-thiadiazole (81 mg, 0.5 mmol),  $Cu(OAc)_2$  (9 mg, 0.05 mmol) and *N*-ethylaniline (60 mg, 0.5 mmol) in  $CH_3CN$



(2.5 mL) at 90 °C for 8 h gave *N*-ethyl-*N*,2-diphenylethanethioamide as yellow oil (80 mg, 63%). <sup>1</sup>H NMR (400 MHz, CDCl<sub>3</sub>) δ 7.37 (d, *J* = 4.9 Hz, 3H), 7.18 (s, 3H), 7.02 (s, 2H), 6.98 – 6.87 (m, 2H), 4.34 (q, *J* = 7.1 Hz, 2H), 3.99 (s, 2H), 1.26 (t, *J* = 7.1 Hz, 3H). <sup>13</sup>C NMR (101 MHz, CDCl<sub>3</sub>) δ 202.0, 143.5, 136.8, 129.6, 128.6, 128.6, 128.2, 127.0, 126.6, 52.3, 51.3, 11.2. HRMS (ESI-quadrupole) *m/z*: [M+H]<sup>+</sup> Calcd. for C<sub>16</sub>H<sub>18</sub>NS 256.1154; found: 256.1151.

### *N*-isopropyl-*N*,2-diphenylethanethioamide (3ai)

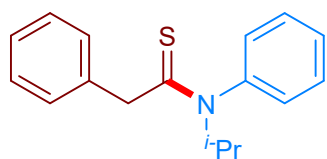

The general procedure D conducted with 4-phenyl-1,2,3-thiadiazole (81 mg, 0.5 mmol), Cu(OAc)<sub>2</sub> (9 mg, 0.05 mmol) and *N*-isopropylaniline (68 mg, 0.5 mmol) in CH<sub>3</sub>CN (2.5 mL) at 90 °C for 8 h gave *N*-isopropyl-*N*,2-diphenylethanethioamide as yellow solid (94 mg, 70%). <sup>1</sup>H NMR (400 MHz, CDCl<sub>3</sub>) δ 7.36 (dt, *J* = 23.0, 7.3 Hz, 3H), 7.17 (d, *J* = 1.8 Hz, 3H), 7.01 (s, 2H), 6.83 (d, *J* = 7.5 Hz, 2H), 6.02 (dt, *J* = 13.4, 6.7 Hz, 1H), 3.94 (s, 2H), 1.11 (d, *J* = 6.8 Hz, 6H). <sup>13</sup>C NMR (101 MHz, CDCl<sub>3</sub>) δ 202.0, 139.1, 136.9, 129.0, 128.8, 128.5, 128.1, 126.6, 53.6, 51.9, 20.2. HRMS (ESI-quadrupole) *m/z*: [M+H]<sup>+</sup> Calcd. for C<sub>17</sub>H<sub>20</sub>NS 270.1311; found: 270.1309.

### *N*-benzyl-*N*,2-diphenylethanethioamide (3aj)

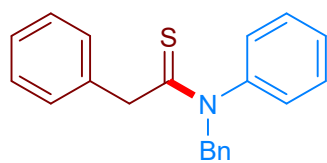

The general procedure D conducted with 4-phenyl-1,2,3-thiadiazole (81 mg, 0.5 mmol), Cu(OAc)<sub>2</sub> (9 mg, 0.05 mmol) and *N*-benzylaniline (92 mg, 0.5 mmol) in CH<sub>3</sub>CN (2.5 mL) at 90 °C for 8 h gave *N*-benzyl-*N*,2-diphenylethanethioamide as yellow solid (129 mg, 76%). <sup>1</sup>H NMR (400 MHz, CDCl<sub>3</sub>) δ 7.37 – 7.25 (m, 8H), 7.21 (dd, *J* = 9.3, 5.6 Hz, 3H), 7.06 (dd, *J* = 6.5, 2.9 Hz, 2H), 6.85 – 6.57 (m, 2H), 5.62 (s, 2H), 4.08 (s, 2H). <sup>13</sup>C NMR (101 MHz, CDCl<sub>3</sub>) δ 203.6, 143.3, 136.7, 135.6, 129.3, 128.9, 128.7, 128.5, 128.4, 128.2, 127.8, 127.2, 126.7, 60.4, 51.2. HRMS (ESI-quadrupole) *m/z*: [M+H]<sup>+</sup> Calcd. for C<sub>21</sub>H<sub>20</sub>NS 318.1311; found: 318.1309.

### *N*-(4-chlorophenyl)-*N*-methyl-2-phenylethanethioamide (3ak)

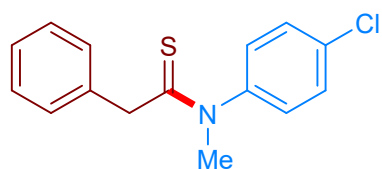

The general procedure D conducted with 4-phenyl-1,2,3-thiadiazole (81 mg, 0.5 mmol), Cu(OAc)<sub>2</sub> (9 mg, 0.05 mmol) and 4-chloro-*N*-methylaniline (70 mg, 0.5 mmol) in CH<sub>3</sub>CN (2.5 mL) at 90 °C for 8 h gave *N*-(4-chlorophenyl)-*N*-methyl-2-phenylethanethioamide as yellow oil (102 mg, 74%). <sup>1</sup>H NMR (400 MHz, CDCl<sub>3</sub>) δ 7.31 (d, *J* = 8.6 Hz, 2H), 7.25 – 7.14 (m, 3H), 7.11 – 6.99 (m, 2H), 6.91 (d, *J* = 8.6 Hz, 2H), 4.03 (s, 2H), 3.69 (s, 3H). <sup>13</sup>C NMR (101 MHz, CDCl<sub>3</sub>) δ 203.0, 143.8, 136.5, 134.3, 129.8, 128.5, 128.3, 127.4, 126.8, 50.9, 46.3. HRMS (ESI-quadrupole) *m/z*: [M+H]<sup>+</sup> Calcd. for C<sub>15</sub>H<sub>15</sub>NCIS 276.0608; found: 276.0606.

### *N*-(4-methoxybenzyl)-2-phenylethanethioamide (3ba)

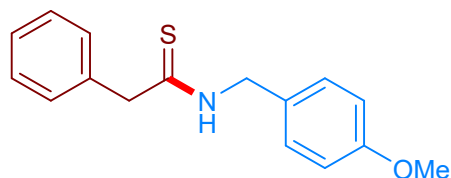

The general procedure B conducted with 4-phenyl-1,2,3-thiadiazole (81 mg, 0.5 mmol), Cu(OAc)<sub>2</sub> (9 mg, 0.05 mmol), Xantphos (28 mg, 0.05 mmol) and (4-methoxyphenyl)methanamine (69 mg, 0.5 mmol) in THF (2.5 mL) at 90 °C for 8 h gave *N*-(4-methoxybenzyl)-2-phenylethanethioamide as yellow oil (125 mg, 92%). <sup>1</sup>H NMR (500 MHz, CDCl<sub>3</sub>) δ 7.25 (t, *J* = 7.2 Hz, 2H), 7.20 (d, *J* = 7.2 Hz, 2H), 7.16 (d, *J* = 7.3 Hz, 2H), 7.02 (d, *J* = 8.5 Hz, 2H), 6.73 (d, *J* = 8.6 Hz, 2H), 4.64 (d, *J* = 5.2 Hz, 2H), 4.04 (s, 2H), 3.67 (s, 3H). <sup>13</sup>C NMR (126 MHz, CDCl<sub>3</sub>) δ 201.9, 159.4, 135.0, 129.4, 129.3, 129.2, 128.0, 127.8, 114.3, 55.3, 53.1, 49.8. Spectroscopic data match those previously reported in the literature.<sup>[15]</sup>

### *N*-benzyl-2-phenylethanethioamide (3bb)

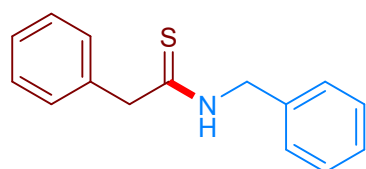

The general procedure B conducted with 4-phenyl-1,2,3-thiadiazole (81 mg, 0.5 mmol), Cu(OAc)<sub>2</sub> (9 mg, 0.05 mmol), Xantphos (28 mg, 0.05 mmol) and phenylmethanamine (53 mg, 0.5 mmol) in THF (2.5 mL) at 90 °C for 8 h gave *N*-benzyl-2-phenylethanethioamide as yellow oil (110 mg, 91%). <sup>1</sup>H NMR (500 MHz, CDCl<sub>3</sub>) δ 7.34 (m, 3H), 7.31 – 7.22 (m, 6H), 7.15 (d, *J* = 6.6 Hz, 2H), 4.80 (d, *J* = 5.4

Hz, 2H), 4.14 (s, 2H).  $^{13}\text{C}$  NMR (126 MHz,  $\text{CDCl}_3$ )  $\delta$  202.3, 136.0, 134.9, 129.5, 129.3, 128.9, 128.0, 127.9, 127.8, 53.1, 50.2. Spectroscopic data match those previously reported in the literature.<sup>[14]</sup>

### 2-Phenyl-*N*-(4-(trifluoromethoxy)benzyl)ethanethioamide (3bc)

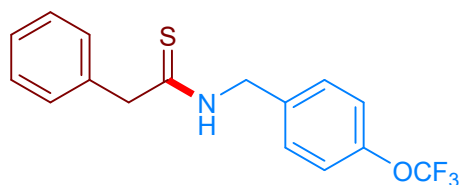

The general procedure B conducted with 4-phenyl-1,2,3-thiadiazole (81 mg, 0.5 mmol),  $\text{Cu}(\text{OAc})_2$  (9 mg, 0.05 mmol), Xantphos (28 mg, 0.05 mmol) and 4-(trifluoromethoxy)-benzylamine (96 mg, 0.5 mmol) in THF (2.5 mL) at 90 °C for 8 h gave 2-phenyl-*N*-(4-(trifluoromethoxy)benzyl)ethanethioamide as yellow solid (145 mg, 89%).  $^1\text{H}$  NMR (500 MHz,  $\text{CDCl}_3$ )  $\delta$  7.41 (s, 1H), 7.35 (t,  $J = 7.2$  Hz, 2H), 7.30 (t,  $J = 7.2$  Hz, 1H), 7.26 (d,  $J = 7.3$  Hz, 2H), 7.19 (d,  $J = 8.5$  Hz, 2H), 7.13 (d,  $J = 8.3$  Hz, 2H), 4.82 (s, 2H), 4.15 (s, 2H).  $^{19}\text{F}$  NMR (471 MHz,  $\text{CDCl}_3$ )  $\delta$  -57.87 (s, 3F).  $^{13}\text{C}$  NMR (126 MHz,  $\text{CDCl}_3$ )  $\delta$  202.8, 148.8, 134.8, 129.5, 129.3, 129.2, 128.0, 121.3, 120.4 (q,  $J = 259.35$  Hz), 53.1, 49.0. HRMS (ESI-quadrupole)  $m/z$ :  $[\text{M}+\text{H}]^+$  Calcd. for  $\text{C}_{16}\text{H}_{15}\text{NOF}_3\text{S}$  326.0821; found: 326.0819.

### *N*-(4-Cyanobenzyl)-2-phenylethanethioamide (3bd)

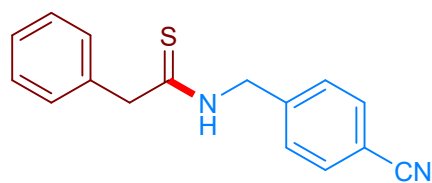

The general procedure B conducted with 4-phenyl-1,2,3-thiadiazole (81 mg, 0.5 mmol),  $\text{Cu}(\text{OAc})_2$  (9 mg, 0.05 mmol), Xantphos (28 mg, 0.05 mmol) and 4-(aminomethyl)benzonitrile (80 mg, 0.5 mmol) in THF (2.5 mL) at 90 °C for 8 h gave (4-cyanobenzyl)-2-phenylethanethioamide as yellow oil (113 mg, 85%).  $^1\text{H}$  NMR (500 MHz,  $\text{CDCl}_3$ )  $\delta$  7.60 (s, 1H), 7.54 (d,  $J = 8.1$  Hz, 2H), 7.37 (t,  $J = 7.2$  Hz, 2H), 7.33 (d,  $J = 6.9$  Hz, 1H), 7.27 (dd,  $J = 12.4, 7.8$  Hz, 4H), 4.90 (s, 2H), 4.17 (s, 2H).  $^{13}\text{C}$  NMR (126 MHz,  $\text{CDCl}_3$ )  $\delta$  203.5, 141.7, 134.9, 132.5, 129.5, 129.3, 128.2, 128.0, 118.6, 111.5, 53.1, 48.9. HRMS (ESI-quadrupole)  $m/z$ :  $[\text{M}+\text{H}]^+$  Calcd. for  $\text{C}_{16}\text{H}_{15}\text{N}_2\text{S}$  267.0950; found: 267.0947.

### (4-bromobenzyl)-2-phenylethanethioamide (3be)

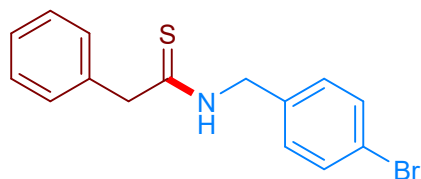

The general procedure B conducted with 4-phenyl-1,2,3-thiadiazole (81 mg, 0.5 mmol), Cu(OAc)<sub>2</sub> (9 mg, 0.05 mmol), Xantphos (28 mg, 0.05 mmol) and 4-bromobenzylamine (92 mg, 0.5 mmol) in THF (2.5 mL) at 90 °C for 8 h gave *N*-(4-bromobenzyl)-2-phenylethanethioamide as yellow solid (150 mg, 94%). <sup>1</sup>H NMR (500 MHz, CDCl<sub>3</sub>) δ 7.39 (d, *J* = 8.2 Hz, 3H), 7.34 (t, *J* = 7.3 Hz, 2H), 7.30 (d, *J* = 6.9 Hz, 1H), 7.24 (d, *J* = 7.6 Hz, 2H), 7.02 (d, *J* = 8.2 Hz, 2H). 4.75 (s, 2H), 4.13 (s, 2H). <sup>13</sup>C NMR (126 MHz, CDCl<sub>3</sub>) δ 202.7, 135.1, 134.8, 131.9, 129.5, 129.5, 129.3, 128.0, 121.8, 53.1, 49.2. HRMS (ESI-quadrupole) *m/z*: [M+H]<sup>+</sup> Calcd. for C<sub>15</sub>H<sub>15</sub>NBrS 320.0104; found: 320.0101.

### (3-Chloro-4-fluorobenzyl)-2-phenylethanethioamide (3bf)

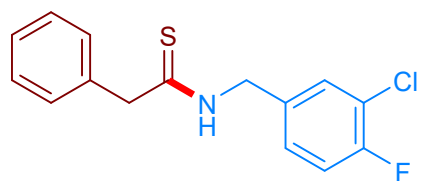

The general procedure B conducted with 4-phenyl-1,2,3-thiadiazole (81 mg, 0.5 mmol), Cu(OAc)<sub>2</sub> (9 mg, 0.05 mmol), Xantphos (28 mg, 0.05 mmol) and (3-chloro-4-fluorophenyl)methanamine (80 mg, 0.5 mmol) in THF (2.5 mL) at 90 °C for 8 h gave *N*-(3-chloro-4-fluorobenzyl)-2-phenylethanethioamide as yellow solid (127 mg, 87%). <sup>1</sup>H NMR (500 MHz, CDCl<sub>3</sub>) δ 7.43 (s, 1H), 7.27 (t, *J* = 7.3 Hz, 2H), 7.22 (d, *J* = 7.0 Hz, 1H), 7.17 (d, *J* = 7.5 Hz, 2H), 7.11 (d, *J* = 6.8 Hz, 1H), 6.99 – 6.89 (m, 2H), 4.67 (d, *J* = 5.3 Hz, 2H), 4.03 (s, 2H). <sup>19</sup>F NMR (376 MHz, CDCl<sub>3</sub>) δ -116.34 (d, *J* = 6.5 Hz, 1F). <sup>13</sup>C NMR (126 MHz, CDCl<sub>3</sub>) δ 203.0, 157.6 (d, *J* = 249.2 Hz), 134.9, 133.3 (d, *J* = 3.8 Hz), 129.9, 129.4, 129.3, 128.0, 127.6 (d, *J* = 7.3 Hz), 121.2 (d, *J* = 18.1 Hz), 116.9 (d, *J* = 21.3 Hz), 53.0, 48.5. HRMS (ESI-quadrupole) *m/z*: [M+H]<sup>+</sup> Calcd. for C<sub>15</sub>H<sub>14</sub>ClNFS 294.0514; found: 294.0512.

### Phenyl-*N*-(1-phenylethyl)ethanethioamide (3bg)

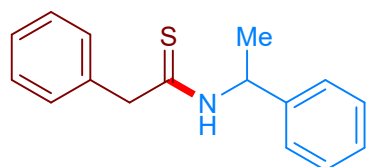

The general procedure C conducted with 4-phenyl-1,2,3-thiadiazole (81 mg, 0.5 mmol), Cu(OAc)<sub>2</sub> (9 mg, 0.05 mmol), Xantphos (28 mg, 0.05 mmol) and 1-

phenylethan-1-amine (66 mg, 0.5 mmol) in 1,4-dioxane (2.5 mL) at 90 °C for 8 h gave phenyl-*N*-(1-phenylethyl)ethanethioamide as yellow oil (108 mg, 85%). <sup>1</sup>H NMR (500 MHz, CDCl<sub>3</sub>) δ 7.36 (ddd, *J* = 23.6, 18.1, 12.8 Hz, 3H), 7.31 – 7.25 (m, 3H), 7.24 (dt, *J* = 11.7, 4.0 Hz, 3H), 7.18 – 7.12 (m, 2H), 5.80 – 5.65 (m, 1H), 4.08 (s, 2H), 1.46 (d, *J* = 6.9 Hz, 3H). <sup>13</sup>C NMR (126 MHz, CDCl<sub>3</sub>) δ 200.9, 141.2, 135.1, 129.4, 129.2, 128.8, 127.9, 127.7, 126.3, 54.5, 53.2, 20.3. Spectroscopic data match those previously reported in the literature.<sup>[16]</sup>

### *N*-(2-(1*H*-indol-3-yl)ethyl)-2-phenylethanethioamide (3bh)

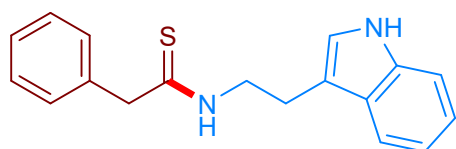

The general procedure B conducted with 4-phenyl-1,2,3-thiadiazole (81 mg, 0.5 mmol), Cu(OAc)<sub>2</sub> (9 mg, 0.05 mmol), Xantphos (28 mg, 0.05 mmol) and 2-(1*H*-indol-3-yl)ethan-1-amine (80 mg, 0.5 mmol) in THF (2.5 mL) at 90 °C for 8 h gave *N*-(2-(1*H*-indol-3-yl)ethyl)-2-phenylethanethioamide as yellow solid (101 mg, 69%). <sup>1</sup>H NMR (400 MHz, CDCl<sub>3</sub>) δ 7.99 (s, 1H), 7.57 (d, *J* = 7.9 Hz, 1H), 7.39 (d, *J* = 8.1 Hz, 1H), 7.32 – 7.21 (m, 4H), 7.15 (t, *J* = 7.4 Hz, 1H), 7.08 (d, *J* = 4.6 Hz, 3H), 6.68 (s, 1H), 4.08 (s, 2H), 3.96 (q, *J* = 6.1 Hz, 2H), 3.03 (t, *J* = 6.5 Hz, 2H). <sup>13</sup>C NMR (126 MHz, CDCl<sub>3</sub>) δ 201.6, 136.4, 134.7, 129.6, 129.1, 127.7, 127.0, 122.4, 122.1, 119.7, 118.6, 111.9, 111.3, 53.1, 46.0, 23.3. HRMS (ESI-quadrupole) *m/z*: [M+H]<sup>+</sup> Calcd. for C<sub>18</sub>H<sub>19</sub>N<sub>2</sub>S 295.1263; found: 295.1262.

### *N*-(*tert*-butyl)-2-phenylethanethioamide (3bi)

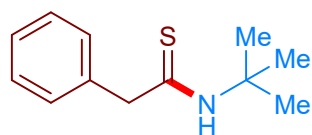

The general procedure B conducted with 4-phenyl-1,2,3-thiadiazole (81 mg, 0.5 mmol), Cu(OAc)<sub>2</sub> (9 mg, 0.05 mmol), Xantphos (28 mg, 0.05 mmol) and 2-methylpropan-2-amine (37 mg, 0.5 mmol) in THF (2.5 mL) at 90 °C for 8 h gave *N*-(*tert*-butyl)-2-phenylethanethioamide as white solid (86 mg, 83%). <sup>1</sup>H NMR (500 MHz, CDCl<sub>3</sub>) δ 7.37 (t, *J* = 7.3 Hz, 2H), 7.31 (t, *J* = 7.3 Hz, 1H), 7.24 (d, *J* = 7.2 Hz, 2H), 6.85 (s, 1H), 4.05 (s, 2H), 1.45 (s, 9H). <sup>13</sup>C NMR (126 MHz, CDCl<sub>3</sub>) δ 200.7, 135.5, 129.4, 129.2, 127.8, 55.8, 55.7, 27.5. Spectroscopic data match those previously reported in the

literature.<sup>[15]</sup>

### 2-Phenyl-*N*-tritylethanethioamide (3bj)

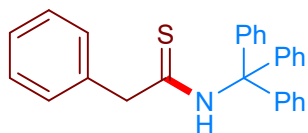

The general procedure B conducted with 4-phenyl-1,2,3-thiadiazole (81 mg, 0.5 mmol), Cu(OAc)<sub>2</sub> (9 mg, 0.05 mmol), Xantphos (28 mg, 0.05 mmol) and triphenylmethanamine (130 mg, 0.5 mmol) in THF (2.5 mL) at 90 °C for 8 h gave 2-phenyl-*N*-tritylethanethioamide as white solid (83 mg, 42%). <sup>1</sup>H NMR (500 MHz, CDCl<sub>3</sub>) δ 8.13 (s, 1H), 7.45 – 7.28 (m, 6H), 7.27 – 7.16 (m, 8H), 7.08 (dd, *J* = 7.7, 1.8 Hz, 6H), 4.17 (s, 2H). <sup>13</sup>C NMR (126 MHz, CDCl<sub>3</sub>) δ 201.0, 142.8, 135.3, 129.5, 129.5, 128.9, 128.0, 127.9, 127.1, 74.0, 56.0. HRMS (ESI-quadrupole) *m/z*: [M+H]<sup>+</sup> Calcd. for C<sub>27</sub>H<sub>24</sub>NS 394.1551; found: 394.1546.

### *N*-((3*S*,5*S*,7*S*)-adamantan-1-yl)-2-phenylethanethioamide (3bk)

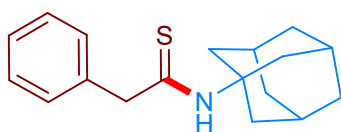

The general procedure B conducted with 4-phenyl-1,2,3-thiadiazole (81 mg, 0.5 mmol), Cu(OAc)<sub>2</sub> (9 mg, 0.05 mmol), Xantphos (28 mg, 0.05 mmol) and (3*S*,5*S*,7*S*)-adamantan-1-amine (76 mg, 0.5 mmol) in THF (2.5 mL) at 90 °C for 8 h gave *N*-((3*S*,5*S*,7*S*)-adamantan-1-yl)-2-phenylethanethioamide as yellow solid (110 mg, 77%). <sup>1</sup>H NMR (500 MHz, CDCl<sub>3</sub>) δ 7.37 (t, *J* = 7.4 Hz, 2H), 7.32 (d, *J* = 7.3 Hz, 1H), 7.23 (d, *J* = 7.2 Hz, 2H), 6.69 (s, 1H), 4.04 (s, 2H), 2.16 (d, *J* = 2.8 Hz, 6H), 2.07 (s, 3H), 1.65 (s, 6H). <sup>13</sup>C NMR (126 MHz, CDCl<sub>3</sub>) δ 200.1, 135.4, 129.4, 129.2, 127.8, 56.5, 56.1, 39.9, 36.2, 29.4. HRMS (ESI-quadrupole) *m/z*: [M+H]<sup>+</sup> Calcd. for C<sub>18</sub>H<sub>24</sub>NS 286.1624; found: 286.1623.

### 1-(2-Phenylethanethioyl)piperidine-2-carboxamide (3bl)

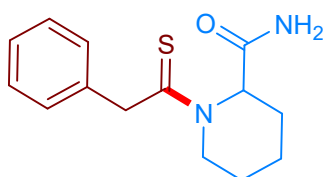

The general procedure C conducted with 4-phenyl-1,2,3-thiadiazole (81 mg, 0.5 mmol), Cu(OAc)<sub>2</sub> (9 mg, 0.05 mmol), Xantphos (28 mg, 0.05 mmol) and piperidine-2-carboxamide (64 mg, 0.5 mmol) in 1,4-dioxane (2.5 mL)

at 90 °C for 8 h gave (2-phenylethanethioyl)piperidine-2-carboxamide as yellow oil (86 mg, 66%). <sup>1</sup>H NMR (400 MHz, CDCl<sub>3</sub>) δ 7.50 – 7.07 (m, 5H), 6.46 (d, *J* = 1.9 Hz, 1H), 6.33 (s, 1H), 6.14 (d, *J* = 28.6 Hz, 1H), 4.46 (d, *J* = 15.2 Hz, 1H), 4.34 (d, *J* = 15.2 Hz, 1H), 4.13 (d, *J* = 13.4 Hz, 1H), 3.10 (td, *J* = 13.4, 2.6 Hz, 1H), 2.27 (d, *J* = 14.1 Hz, 1H), 1.91 – 1.43 (m, 4H), 1.14 – 0.91 (m, 1H). <sup>13</sup>C NMR (101 MHz, CDCl<sub>3</sub>) δ 201.7, 171.7, 135.8, 129.0, 127.8, 127.2, 60.0, 50.7, 48.7, 25.6, 25.2, 19.7. HRMS (ESI-quadrupole) *m/z*: [M+H]<sup>+</sup> Calcd. for C<sub>14</sub>H<sub>19</sub>N<sub>2</sub>OS 263.1213; found: 263.1210.

### (1*R*,5*S*)-8-(2-Phenylethanethioyl)-8-azabicyclo[3.2.1]octan-3-one (3bm)

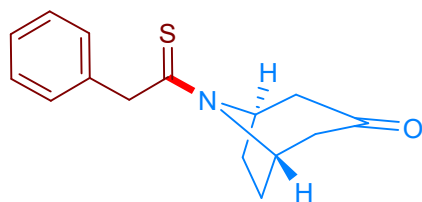

The general procedure C conducted with 4-phenyl-1,2,3-thiadiazole (81 mg, 0.5 mmol), Cu(OAc)<sub>2</sub> (9 mg, 0.05 mmol), Xantphos (28 mg, 0.05 mmol) and (1*R*,5*S*)-8-azabicyclo[3.2.1]octan-3-one (62.5 mg, 0.5 mmol) in 1,4-dioxane (2.5 mL) at 90 °C for 8 h gave (1*R*,5*S*)-8-(2-phenylethanethioyl)-8-aza bicyclo[3.2.1]octan-3-one as yellow oil (95.8 mg, 74%). <sup>1</sup>H NMR (500 MHz, CDCl<sub>3</sub>) δ 7.40 (d, *J* = 7.6 Hz, 2H), 7.32 (t, *J* = 7.5 Hz, 2H), 7.25 (t, *J* = 7.3 Hz, 1H), 5.60 (dd, *J* = 7.7, 3.7 Hz, 1H), 4.69 (dd, *J* = 6.5, 5.2 Hz, 1H), 4.38 (d, *J* = 14.7 Hz, 1H), 4.27 (d, *J* = 14.7 Hz, 1H), 2.96 (dd, *J* = 16.1, 3.6 Hz, 1H), 2.39 (d, *J* = 16.1 Hz, 1H), 2.25 – 2.11 (m, 2H), 2.11 – 1.98 (m, 1H), 1.92 (ddd, *J* = 16.3, 4.6, 1.7 Hz, 1H), 1.85 – 1.68 (m, 2H). <sup>13</sup>C NMR (126 MHz, CDCl<sub>3</sub>) δ 206.1, 196.0, 135.8, 129.1, 128.0, 127.4, 57.6, 57.2, 51.1, 48.3, 47.3, 29.5, 26.7. Optical Rotation: [α]<sup>25</sup><sub>D</sub> = -2.26 (c 0.35, CH<sub>2</sub>Cl<sub>2</sub>). HRMS (ESI-quadrupole) *m/z*: [M+H]<sup>+</sup> Calcd. for C<sub>15</sub>H<sub>18</sub>NOS 260.1104; found: 260.1106.

### *tert*-Butyl-(1*S*,4*S*)-5-(2-phenylethanethioyl)-2,5-diazabicyclo[2.2.1]heptane-2-carboxylate (3bn)

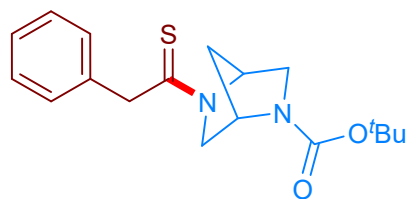

The general procedure C conducted with 4-phenyl-1,2,3-thiadiazole (81 mg, 0.5 mmol), Cu(OAc)<sub>2</sub> (9 mg, 0.05 mmol), Xantphos (28 mg, 0.05 mmol) and *tert*-butyl (1*S*,4*S*)-2,5-diazabicyclo[2.2.1]heptane-2-

carboxylate (99 mg, 0.5 mmol) in 1,4-dioxane (2.5 mL) at 90 °C for 8 h gave tert-butyl (1*S*,4*S*)-5-(2-phenylethanethioyl)-2,5-diazabicyclo[2.2.1]heptane-2-carboxylate as yellow oil (97.9 mg, 59%). <sup>1</sup>H NMR (500 MHz, CDCl<sub>3</sub>) δ 7.47 – 6.98 (m, 5H), 4.80 – 4.42 (m, 2H), 4.25 (s, 1H), 4.17 – 3.98 (m, 1H), 3.92 – 3.68 (m, 1H), 3.49 (ddd, *J* = 42.3, 34.2, 10.1 Hz, 2H), 3.04 (ddd, *J* = 94.3, 57.7, 10.2 Hz, 1H), 2.15 – 1.75 (m, 2H), 1.41 (t, *J* = 17.1 Hz, 9H). <sup>13</sup>C NMR (126 MHz, CDCl<sub>3</sub>) δ 197.99, 196.89, 153.95, 135.29, 128.86, 128.20, 127.17, 80.20, 67.03, 62.92, 61.58, 57.97, 56.56, 52.22, 51.79, 50.93, 50.50, 37.94, 36.22, 28.39. Optical Rotation: [α]<sup>25</sup><sub>D</sub> = -175.4 (c 0.56, CH<sub>2</sub>Cl<sub>2</sub>). HRMS (ESI-quadrupole) *m/z*: [M+H]<sup>+</sup> Calcd. for C<sub>18</sub>H<sub>25</sub>N<sub>2</sub>O<sub>2</sub>S 333.1631; found: 333.1629.

**(1*S*,5*R*)-3-(2-phenylethanethioyl)-1,2,3,4,5,6-hexahydro-8*H*-1,5-methanopyrido[1,2-*a*][1,5]diazocin-8-one (3bo)**

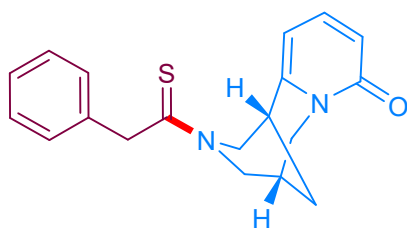

The general procedure C conducted with 4-phenyl-1,2,3-thiadiazole (81 mg, 0.5 mmol), Cu(OAc)<sub>2</sub> (9 mg, 0.05 mmol), Xantphos (28 mg, 0.05 mmol) and CYTISINE (95 mg, 0.5 mmol) in 1,4-dioxane (2.5 mL) at 90 °C for 8 h gave (1*S*,5*R*)-3-(2-phenylethanethioyl)-1,2,3,4,5,6-hexahydro-8*H*-1,5-methanopyrido[1,2-*a*][1,5]diazocin-8-one as yellow oil (94 mg, 58%). <sup>1</sup>H NMR (400 MHz, CDCl<sub>3</sub>) δ 7.23 (d, *J* = 5.0 Hz, 2H), 7.19 – 6.92 (m, 5H), 6.37 (dd, *J* = 22.1, 9.1 Hz, 1H), 6.11 (d, *J* = 6.8 Hz, 0.5H), 5.87 (dd, *J* = 24.8, 13.4 Hz, 1H), 5.72 (d, *J* = 6.8 Hz, 0.5H), 4.42 – 3.88 (m, 4H), 3.69 (ddd, *J* = 76.4, 15.6, 6.4 Hz, 1H), 3.47 – 2.89 (m, 4H), 2.10 – 1.81 (m, 2.5H), 1.21 (dd, *J* = 7.8, 6.4 Hz, 0.5H). <sup>13</sup>C NMR (101 MHz, CDCl<sub>3</sub>) δ 202.6, 202.4, 163.2, 163.0, 147.5, 147.1, 139.1, 138.9, 135.5, 135.5, 129.3, 129.0, 127.4, 127.2, 127.1, 126.8, 117.7, 117.5, 106.2, 105.2, 55.9, 55.8, 55.2, 55.1, 51.0, 50.5, 48.5, 48.4, 35.1, 34.8, 28.4, 28.0, 25.7, 25.5. Optical Rotation: [α]<sup>25</sup><sub>D</sub> = -332.4 (c 0.47, CH<sub>2</sub>Cl<sub>2</sub>). HRMS (ESI-quadrupole) *m/z*: [M+H]<sup>+</sup> Calcd. for C<sub>19</sub>H<sub>21</sub>N<sub>2</sub>OS 325.1369; found: 325.1366.

**Methyl (2-phenylethanethioyl)glycinate (3ca)**



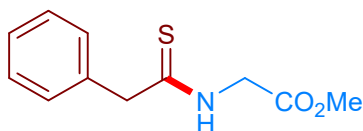

The general procedure B conducted with 4-phenyl-1,2,3-thiadiazole (81 mg, 0.5 mmol), Cu(OAc)<sub>2</sub> (9 mg, 0.05 mmol), Xantphos (28 mg, 0.05 mmol) and methyl glycinate (45 mg, 0.5 mmol) in THF (2.5 mL) at 90 °C for 8 h gave methyl (2-phenylethanethioyl)glycinate as yellow oil (59 mg, 53%). <sup>1</sup>H NMR (400 MHz, CDCl<sub>3</sub>) δ 7.64 (s, 1H), 7.52 – 6.99 (m, 5H), 4.37 (d, *J* = 4.6 Hz, 2H), 4.18 (s, 2H), 3.76 (s, 3H). <sup>13</sup>C NMR (101 MHz, CDCl<sub>3</sub>) δ 202.9, 169.2, 134.7, 129.5, 129.2, 127.9, 52.7, 52.7, 47.2. HRMS (ESI-quadrupole) *m/z*: [M+H]<sup>+</sup> Calcd. for C<sub>11</sub>H<sub>14</sub>NO<sub>2</sub>S 224.0740; found: 224.0737.

### Methyl (2-phenylethanethioyl)-*L*-valinate (3cb)

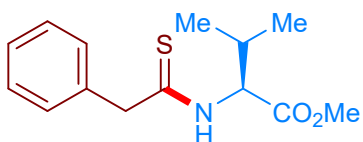

The general procedure B conducted with 4-phenyl-1,2,3-thiadiazole (81 mg, 0.5 mmol), Cu(OAc)<sub>2</sub> (9 mg, 0.05 mmol), Xantphos (28 mg, 0.05 mmol) and methyl *L*-valinate (66 mg, 0.5 mmol) in THF (2.5 mL) at 90 °C for 8 h gave methyl (2-phenylethanethioyl)-*L*-valinate as yellow oil (76 mg, 57%). <sup>1</sup>H NMR (400 MHz, CDCl<sub>3</sub>) δ 7.55 (s, 1H), 7.40 (t, *J* = 7.3 Hz, 2H), 7.32 (dd, *J* = 16.9, 6.9 Hz, 3H), 5.10 (dd, *J* = 8.2, 4.7 Hz, 1H), 4.16 (q, *J* = 16.3 Hz, 2H), 3.72 (s, 3H), 2.27 (dq, *J* = 13.7, 6.8 Hz, 1H), 0.98 – 0.70 (m, 6H). <sup>13</sup>C NMR (101 MHz, CDCl<sub>3</sub>) δ 202.9, 171.1, 134.9, 129.4, 129.2, 127.9, 62.6, 53.2, 52.3, 30.8, 18.4, 18.3. Optical Rotation: [α]<sup>25</sup><sub>D</sub> = 5.75 (c 0.26, CH<sub>2</sub>Cl<sub>2</sub>). HRMS (ESI-quadrupole) *m/z*: [M+H]<sup>+</sup> Calcd. for C<sub>14</sub>H<sub>20</sub>NO<sub>2</sub>S 266.1209; found: 266.1206.

### Methyl (2-phenylethanethioyl)-*L*-phenylalaninate (3cc)

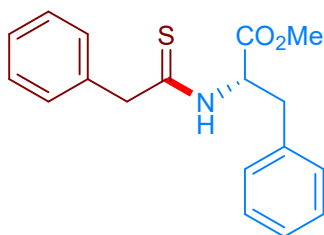

The general procedure B conducted with 4-phenyl-1,2,3-thiadiazole (81 mg, 0.5 mmol), Cu(OAc)<sub>2</sub> (9 mg, 0.05 mmol), Xantphos (28 mg, 0.05 mmol) and methyl *L*-phenylalaninate (90 mg, 0.5 mmol) in THF (2.5 mL) at 90 °C for 8 h gave methyl (2-phenylethanethioyl)-*L*-phenylalaninate as yellow solid (82 mg, 52%). <sup>1</sup>H NMR (400 MHz, CDCl<sub>3</sub>) δ 7.44 (s, 1H), 7.35 (dd, *J* = 5.9, 5.4 Hz, 3H),

7.21 (dd,  $J = 10.3, 4.9$  Hz, 5H), 6.96 – 6.55 (m, 2H), 5.40 (dt,  $J = 7.3, 5.4$  Hz, 1H), 4.13 (dd,  $J = 38.0, 16.2$  Hz, 2H), 3.74 (s, 3H), 3.34 (dd,  $J = 14.0, 5.6$  Hz, 1H), 3.11 (dd,  $J = 14.0, 5.1$  Hz, 1H).  $^{13}\text{C}$  NMR (101 MHz,  $\text{CDCl}_3$ )  $\delta$  202.0, 170.9, 135.1, 134.5, 129.5, 129.2, 129.1, 128.6, 127.9, 127.2, 58.3, 53.2, 52.5, 36.0. Optical Rotation:  $[\alpha]_{\text{D}}^{25} = 43.1$  (c 0.07,  $\text{CH}_2\text{Cl}_2$ ). HRMS (ESI-quadrupole)  $m/z$ :  $[\text{M}+\text{H}]^+$  Calcd. for  $\text{C}_{18}\text{H}_{20}\text{NO}_2\text{S}$  314.1209; found: 314.1204.

### Methyl (2-phenylethanethioyl)-*D*-tyrosinate (3cd)

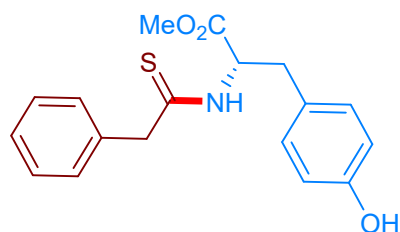

The general procedure B conducted with 4-phenyl-1,2,3-thiadiazole (81 mg, 0.5 mmol),  $\text{Cu}(\text{OAc})_2$  (9 mg, 0.05 mmol), Xantphos (28 mg, 0.05 mmol) and methyl *D*-tyrosinate (98 mg, 0.5 mmol) in THF (2.5 mL) at 90 °C for 8 h gave methyl (2-phenylethanethioyl)-*D*-tyrosinate as yellow solid (135 mg, 82%).  $^1\text{H}$  NMR (400 MHz,  $\text{CDCl}_3$ )  $\delta$  7.48 (d,  $J = 6.2$  Hz, 1H), 7.43 – 7.28 (m, 3H), 7.20 (d,  $J = 7.5$  Hz, 2H), 6.72 – 6.50 (m, 4H), 5.91 (s, 1H), 5.35 (dd,  $J = 12.7, 5.4$  Hz, 1H), 4.11 (dd,  $J = 41.7, 16.2$  Hz, 2H), 3.75 (d,  $J = 7.1$  Hz, 3H), 3.23 (dd,  $J = 14.2, 5.5$  Hz, 1H), 3.03 (dd,  $J = 14.2, 5.2$  Hz, 1H).  $^{13}\text{C}$  NMR (101 MHz,  $\text{CDCl}_3$ )  $\delta$  202.3, 171.3, 155.1, 134.4, 130.2, 129.5, 129.2, 127.9, 126.7, 115.7, 58.6, 53.0, 52.6, 35.3. Optical Rotation:  $[\alpha]_{\text{D}}^{25} = -95.2$  (c 0.06,  $\text{CH}_2\text{Cl}_2$ ). HRMS (ESI-quadrupole)  $m/z$ :  $[\text{M}+\text{H}]^+$  Calcd. for  $\text{C}_{18}\text{H}_{20}\text{NO}_3\text{S}$  330.1158; found: 330.1153.

### Methyl (2-phenylethanethioyl)-*L*-tryptophanate (3ce)

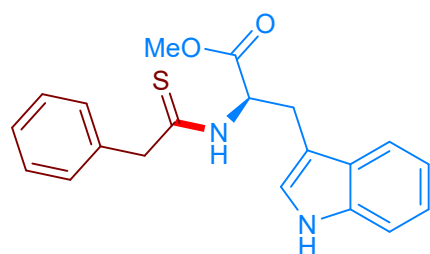

The general procedure B conducted with 4-phenyl-1,2,3-thiadiazole (81 mg, 0.5 mmol),  $\text{Cu}(\text{OAc})_2$  (9 mg, 0.05 mmol), Xantphos (28 mg, 0.05 mmol) and methyl *L*-tryptophanate (109 mg, 0.5 mmol) in THF (2.5 mL) at 90 °C for 8 h gave methyl (2-phenylethanethioyl)-*L*-tryptophanate as yellow oil (110 mg, 63%).  $^1\text{H}$  NMR (400 MHz,  $\text{CDCl}_3$ )  $\delta$  8.18 (s, 1H), 7.54 (d,  $J = 6.4$  Hz, 1H), 7.48 (d,  $J = 7.9$  Hz, 1H), 7.36 (d,  $J = 8.1$  Hz, 1H), 7.31 – 7.18 (m, 4H), 7.14 (t,  $J = 7.4$  Hz, 1H), 7.10 –

6.92 (m, 2H), 6.58 (d,  $J = 1.8$  Hz, 1H), 5.44 (dd,  $J = 12.4, 5.2$  Hz, 1H), 4.07 (s, 2H), 3.69 (d,  $J = 6.4$  Hz, 3H), 3.64 – 3.48 (m, 1H), 3.34 (dd,  $J = 14.9, 4.8$  Hz, 1H).  $^{13}\text{C}$  NMR (101 MHz,  $\text{CDCl}_3$ )  $\delta$  202.1, 171.4, 136.1, 134.6, 129.5, 129.0, 127.7, 127.5, 122.8, 122.3, 119.8, 118.5, 111.3, 109.1, 58.3, 53.1, 52.6, 25.9. Optical Rotation:  $[\alpha]_{\text{D}}^{25} = 48.8$  (c 0.16,  $\text{CH}_2\text{Cl}_2$ ). HRMS (ESI-quadrupole)  $m/z$ :  $[\text{M}+\text{H}]^+$  Calcd. for  $\text{C}_{20}\text{H}_{21}\text{N}_2\text{O}_2\text{S}$  353.1318; found: 353.1312.

### Methyl *N*2-((benzyloxy)carbonyl)-*N*6-(2-phenylethanethioyl)-*L*-lysinate (3cf)

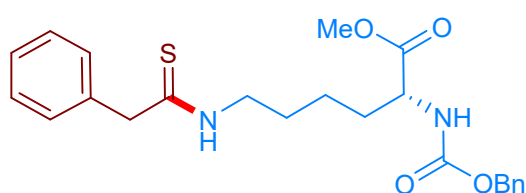

The general procedure B conducted with 4-phenyl-1,2,3-thiadiazole (81 mg, 0.5 mmol),  $\text{Cu}(\text{OAc})_2$  (9 mg, 0.05 mmol), Xantphos (28 mg, 0.05 mmol) and methyl ((benzyloxy)carbonyl)-*L*-lysinate (147 mg, 0.5 mmol) in THF (2.5 mL) at 90 °C for 8 h gave methyl *N*2-((benzyloxy)carbonyl)-*N*6-(2-phenylethanethioyl)-*L*-lysinate as yellow oil (155 mg, 73%).  $^1\text{H}$  NMR (400 MHz,  $\text{CDCl}_3$ )  $\delta$  7.62 – 6.84 (m, 10H), 5.43 (d,  $J = 8.0$  Hz, 1H), 5.12 (d,  $J = 11.5$  Hz, 2H), 4.34 (d,  $J = 4.8$  Hz, 1H), 4.23 – 3.97 (m, 2H), 3.73 (s, 3H), 3.59 (d,  $J = 4.6$  Hz, 2H), 1.81 (d,  $J = 7.3$  Hz, 1H), 1.71 – 1.48 (m, 3H), 1.28 (dd,  $J = 19.6, 12.5$  Hz, 3H).  $^{13}\text{C}$  NMR (101 MHz,  $\text{CDCl}_3$ )  $\delta$  202.1, 172.7, 156.1, 136.1, 135.3, 129.4, 129.2, 128.6, 128.3, 128.1, 127.7, 67.1, 53.5, 53.0, 52.5, 45.7, 32.4, 27.0, 22.5. Optical Rotation:  $[\alpha]_{\text{D}}^{25} = 6.83$  (c 0.28,  $\text{CH}_2\text{Cl}_2$ ). HRMS (ESI-quadrupole)  $m/z$ :  $[\text{M}+\text{H}]^+$  Calcd. for  $\text{C}_{23}\text{H}_{29}\text{N}_2\text{O}_4\text{S}$  429.1843; found: 429.1838.

### Ethyl (2-phenylethanethioyl)-*L*-prolinate (3cg)

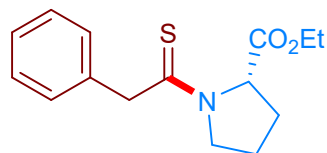

The general procedure C conducted with 4-phenyl-1,2,3-thiadiazole (81 mg, 0.5 mmol),  $\text{Cu}(\text{OAc})_2$  (9 mg, 0.05 mmol), Xantphos (28 mg, 0.05 mmol) and ethyl *L*-prolinate (72 mg, 0.5 mmol) in 1,4-dioxane (2.5 mL) at 90 °C for 8 h gave ethyl (2-phenylethanethioyl)-*L*-prolinate as yellow oil (94 mg, 68%).  $^1\text{H}$  NMR (400 MHz,  $\text{CDCl}_3$ )  $\delta$  7.67 – 6.83 (m, 5H), 5.00 (dd,  $J = 9.0, 2.8$  Hz, 1H), 4.42 – 4.02 (m, 4H), 3.81 – 3.45 (m, 2H), 2.49 – 2.13 (m, 1H), 2.13 – 1.84 (m, 3H), 1.26 (t,  $J = 7.1$  Hz, 3H).

$^{13}\text{C}$  NMR (101 MHz,  $\text{CDCl}_3$ )  $\delta$  199.2, 170.4, 135.4, 128.7, 128.4, 126.9, 65.8, 61.3, 51.5, 51.1, 29.4, 25.1, 14.2. Optical Rotation:  $[\alpha]^{25}_{\text{D}} = -90.9$  (c 0.36,  $\text{CH}_2\text{Cl}_2$ ). HRMS (ESI-quadrupole)  $m/z$ :  $[\text{M}+\text{H}]^+$  Calcd. for  $\text{C}_{15}\text{H}_{20}\text{NO}_2\text{S}$  278.1209; found: 278.1206.

### AMinoglutethiMide derivative (3da)

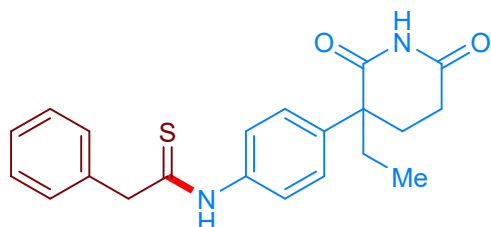

The general procedure A conducted with 4-phenyl-1,2,3-thiadiazole (81 mg, 0.5 mmol),  $\text{Cu}(\text{OAc})_2$  (9 mg, 0.05 mmol), Xantphos (28 mg, 0.05 mmol) and AMinoglutethiMide (116 mg, 0.5 mmol) in DMF (2.5 mL) at 90 °C for 8 h gave AMinoglutethiMide thioamide derivative as yellow oil (106.1 mg, 58%).  $^1\text{H}$  NMR (500 MHz,  $\text{CDCl}_3$ )  $\delta$  8.71 (s, 1H), 8.21 (s, 1H), 7.66 (d,  $J = 8.6$  Hz, 2H), 7.52 – 7.38 (m, 2H), 7.38 – 7.30 (m, 3H), 7.33 – 7.19 (m, 2H), 4.25 (s, 2H), 2.57 (dd,  $J = 18.1, 4.1$  Hz, 1H), 2.35 (td,  $J = 13.1, 5.7$  Hz, 2H), 2.21 (dd,  $J = 14.0, 4.8$  Hz, 1H), 2.01 (dd,  $J = 14.2, 7.3$  Hz, 1H), 1.89 (s, 1H), 1.00 – 0.66 (m, 3H).  $^{13}\text{C}$  NMR (126 MHz,  $\text{CDCl}_3$ )  $\delta$  201.1, 174.9, 172.2, 138.0, 137.2, 135.0, 129.5, 129.4, 128.1, 126.7, 123.6, 55.2, 50.9, 32.8, 29.2, 27.0, 9.0. HRMS (ESI-quadrupole)  $m/z$ :  $[\text{M}+\text{H}]^+$  Calcd. for  $\text{C}_{21}\text{H}_{23}\text{N}_2\text{O}_2\text{S}$  367.1475; found: 367.1471.

### Ibrutinib intermediate (3db)

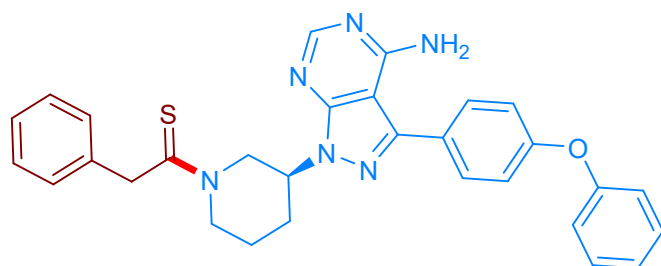

The general procedure C conducted with 4-phenyl-1,2,3-thiadiazole (81 mg, 0.5 mmol),  $\text{Cu}(\text{OAc})_2$  (9 mg, 0.05 mmol), Xantphos (28 mg, 0.05 mmol) and Ibrutinib intermediate (193 mg, 0.5 mmol) in 1,4-dioxane (2.5 mL) at 90 °C for 8 h gave Ibrutinib intermediate thioamide derivative as yellow oil (221 mg, 85%).  $^1\text{H}$  NMR (500 MHz,  $\text{CDCl}_3$ )  $\delta$  8.33 (d,  $J = 15.5$  Hz, 1H), 7.63 (t,  $J = 8.0$  Hz, 2H), 7.38 (t,  $J = 7.9$  Hz, 3H), 7.34 – 7.20 (m, 3H), 7.16 (t,  $J = 10.4$  Hz, 3H), 7.08 (d,  $J = 7.9$  Hz, 2H), 6.74 – 5.41 (m, 2H), 5.20 – 4.58 (m, 1H), 4.57 – 4.06 (m, 4H), 3.76 (dt,  $J = 38.3,$

19.0 Hz, 1H), 3.23 (dt,  $J = 24.4, 11.8$  Hz, 1H), 2.32 (dddd,  $J = 61.8, 53.9, 45.4, 40.9$  Hz, 2H), 1.93 – 1.53 (m, 1H), 1.49 – 1.01 (m, 2H).  $^{13}\text{C}$  NMR (126 MHz,  $\text{CDCl}_3$ )  $\delta$  200.34, 158.62, 158.10, 156.28, 155.66, 154.13, 144.18, 135.90, 130.01, 129.93, 128.91, 127.86, 127.57, 127.02, 124.12, 119.60, 119.10, 98.57, 60.42, 55.84 – 52.57, 52.32 – 49.81, 29.53, 23.71, 21.08, 14.22. Optical Rotation:  $[\alpha]_{\text{D}}^{25} = -211.9$  (c 0.18,  $\text{CH}_2\text{Cl}_2$ ). HRMS (ESI-quadrupole)  $m/z$ :  $[\text{M}+\text{H}]^+$  Calcd. for  $\text{C}_{30}\text{H}_{29}\text{N}_6\text{OS}$  521.2118; found: 521.2119.

**1-(4-(8-Chloro-5,6-dihydro-11H-benzo[5,6]cyclohepta[1,2-b]pyridin-11-ylidene)piperidin-1-yl)-2-phenylethane-1-thione (3dc)**

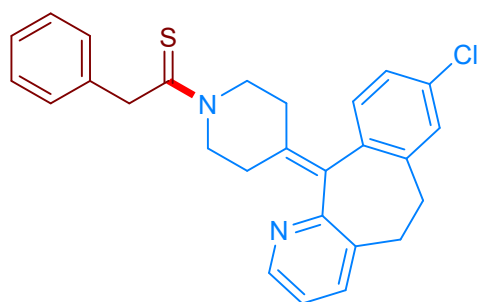

The general procedure C conducted with 4-phenyl-1,2,3-thiadiazole (81 mg, 0.5 mmol),  $\text{Cu}(\text{OAc})_2$  (9 mg, 0.05 mmol), Xantphos (28 mg, 0.05 mmol) and Desloratadine (95 mg, 0.5 mmol) in 1,4-dioxane (2.5 mL) at 90 °C for 8 h gave 1-(4-(8-chloro-5,6-dihydro-11H-benzo[5,6]cyclohepta[1,2-b]pyridin-11-ylidene)-piperidin-1-yl)-2-phenylethane-1-thione as yellow oil (180 mg, 81%).  $^1\text{H}$  NMR (400 MHz,  $\text{CDCl}_3$ )  $\delta$  8.45 – 8.18 (m, 1H), 7.40 (t,  $J = 6.4$  Hz, 1H), 7.36 – 7.22 (m, 4H), 7.21 – 6.87 (m, 5H), 5.19 – 4.63 (m, 1H), 4.61 – 4.19 (m, 2H), 3.80 (qdd,  $J = 13.7, 11.2, 4.5$  Hz, 2H), 3.61 – 3.13 (m, 3H), 3.12 – 2.61 (m, 3H), 2.61 – 2.23 (m, 2H), 2.09 (dd,  $J = 13.5, 7.7$  Hz, 1H).  $^{13}\text{C}$  NMR (101 MHz,  $\text{CDCl}_3$ )  $\delta$  199.1, 199.0, 156.5, 156.3, 146.7, 146.6, 139.7, 139.6, 137.8, 137.7, 137.5, 137.3, 136.0, 135.3, 135.2, 135.1, 133.4, 133.3, 133.1, 133.0, 130.4, 130.2, 129.1, 128.9, 127.8, 127.7, 127.0, 126.3, 126.2, 122.5, 122.5, 51.0, 50.3, 31.6, 31.5, 31.5, 30.5, 30.3, 29.7, 29.4. HRMS (ESI-quadrupole)  $m/z$ :  $[\text{M}+\text{H}]^+$  Calcd. for  $\text{C}_{27}\text{H}_{26}\text{N}_2\text{ClS}$  445.1500; found: 445.1495.

**5,6-Dimethoxy-2-((1-(2-phenylethanethioyl)piperidin-4-yl)methyl)-2,3-dihydro-1H-inden-1-one (3dd)**

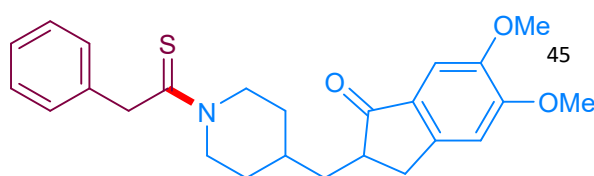

The general procedure C conducted

with 4-phenyl-1,2,3-thiadiazole (81 mg, 0.5 mmol), Cu(OAc)<sub>2</sub> (9 mg, 0.05 mmol), Xantphos (28 mg, 0.05 mmol) and 5,6-Dimethoxy-2-(4-piperidinylmethyl)-1-indanone (145 mg, 0.5 mmol) in 1,4-dioxane (2.5 mL) at 90 °C for 8 h gave 5,6-dimethoxy-2-((1-(2-phenylethanethioyl)piperidin-4-yl)methyl)-2,3-dihydro-1*H*-inden-1-one as yellow oil (160 mg, 75%). <sup>1</sup>H NMR (400 MHz, CDCl<sub>3</sub>) δ 7.40 – 7.18 (m, 5H), 7.12 (s, 1H), 6.83 (s, 1H), 5.87 – 5.35 (m, 1H), 4.33 (dd, *J* = 35.7, 15.2 Hz, 2H), 4.22 – 4.04 (m, 1H), 3.94 (d, *J* = 7.0 Hz, 3H), 3.88 (d, *J* = 6.9 Hz, 3H), 3.54 – 3.14 (m, 1H), 3.02 (ddd, *J* = 21.7, 21.1, 11.4 Hz, 2H), 2.62 (ddd, *J* = 19.3, 12.2, 7.5 Hz, 2H), 1.92 – 1.71 (m, 3H), 1.62 (s, 1H), 1.43 – 1.17 (m, 3H). <sup>13</sup>C NMR (101 MHz, CDCl<sub>3</sub>) δ 207.1, 198.6, 155.6, 149.5, 148.6 (d, *J* = 2.9 Hz), 136.1, 129.1 (d, *J* = 5.3 Hz), 128.8 (d, *J* = 1.0 Hz), 127.8 (d, *J* = 1.1 Hz), 126.9 (d, *J* = 3.5 Hz), 107.4, 104.4, 56.2 (d, *J* = 13.8 Hz), 50.8 (d, *J* = 37.3 Hz), 44.9 (d, *J* = 26.5 Hz), 38.0 (d, *J* = 16.3 Hz), 33.8 (d, *J* = 38.3 Hz), 33.3 (d, *J* = 22.6 Hz), 32.8, 32.0 (d, *J* = 16.8 Hz), 31.0. HRMS (ESI-quadrupole) *m/z*: [M+H]<sup>+</sup> Calcd. for C<sub>25</sub>H<sub>30</sub>NO<sub>3</sub>S 424.1941; found: 424.1935.

**N-Methyl-2-phenyl-*N*-(3-phenyl-3-(4-(trifluoromethyl)phenoxy)propyl)ethanethioamide (3de)**

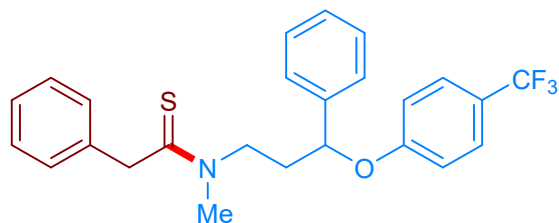

The general procedure C conducted with 4-phenyl-1,2,3-thiadiazole (81 mg, 0.5 mmol), Cu(OAc)<sub>2</sub> (9 mg, 0.05 mmol), Xantphos (28 mg, 0.05 mmol) and Fluoxetine (155 mg, 0.5 mmol) in 1,4-dioxane (2.5 mL) at 90 °C for 8 h gave N-methyl-2-phenyl-*N*-(3-phenyl-3-(4-(trifluoromethyl)phenoxy)propyl)ethanethioamide as yellow oil (171 mg, 77%). <sup>1</sup>H NMR (400 MHz, CDCl<sub>3</sub>) δ 7.46 (dd, *J* = 13.1, 8.7 Hz, 2H), 7.41 – 7.19 (m, 10H), 6.89 (t, *J* = 8.2 Hz, 2H), 5.17 (ddd, *J* = 11.9, 8.6, 3.7 Hz, 1H), 4.53 – 4.07 (m, 3H), 3.93 – 3.65 (m, 1H), 3.31 (d, *J* = 126.3 Hz, 3H), 2.65 – 2.26 (m, 1H), 2.10 – 1.96 (m, 1H). <sup>19</sup>F NMR (376 MHz, CDCl<sub>3</sub>) δ -61.49 (d, *J* = 23.6 Hz, 3F). <sup>13</sup>C NMR (101 MHz, CDCl<sub>3</sub>) δ 200.7, 160.1, 139.9, 135.9, 129.1, 129.0 – 128.8, 128.4, 128.1, 127.1, 127.0 – 126.7, 125.6, 115.8, 53.5, 51.3, 50.6, 41.8, 35.5, 29.7. HRMS (ESI-quadrupole) *m/z*: [M+H]<sup>+</sup> Calcd. for C<sub>25</sub>H<sub>25</sub>NF<sub>3</sub>OS 444.1603; found:

444.1599.

**Ethyl-(*R*)-2''-(1-(2-phenylethanethioamido)ethyl)-[2,4':2',4''-terthiazole]-4-carboxylate (3df)**

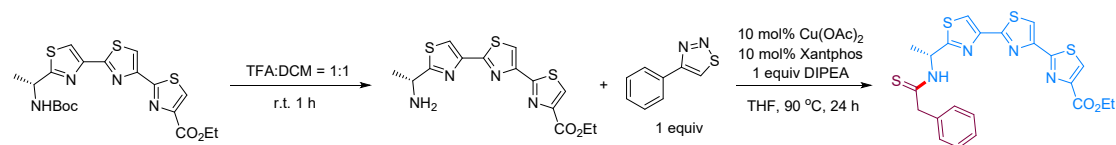

The modified procedure B conducted with ethyl (*R*)-2''-(1-((tert-butoxycarbonyl)amino)ethyl)-[2,4':2',4''-terthiazole]-4-carboxylate (60 mg, 0.13 mmol) in TFA/DCM (1 mL:1 mL) at r.t. for 1 h. TLC monitored until quant. transformation. Removing the excess TFA and DCM, concentrated in vacuo, after which, 4-phenyl-1,2,3-thiadiazole (21 mg, 0.13 mmol), Cu(OAc)<sub>2</sub> (2 mg, 0.013 mmol), Xantphos (6 mg, 0.013 mmol) and DIPEA (17 mg, 0.13 mmol) in THF (0.5 mL) at 90 °C for 8 h gave ethyl-(*R*)-2''-(1-(2-phenylethanethioamido)ethyl) -[2,4':2',4''-terthiazole]-4-carboxylate as yellow solid (40 mg, 62%). <sup>1</sup>H NMR (400 MHz, CDCl<sub>3</sub>) δ 8.17 (s, 1H), 8.09 (s, 2H), 7.94 (s, 1H), 7.35 (dd, *J* = 19.3, 6.2 Hz, 5H), 6.39 – 5.56 (m, 1H), 4.44 (dd, *J* = 13.6, 6.6 Hz, 2H), 4.20 (s, 2H), 1.66 (d, *J* = 6.5 Hz, 3H), 1.42 (t, *J* = 6.8 Hz, 3H). <sup>13</sup>C NMR (101 MHz, CDCl<sub>3</sub>) δ 201.9, 170.7, 163.2, 162.6, 161.4, 149.1, 147.9, 147.8, 134.8, 129.5, 129.3, 127.9, 118.0, 117.1, 61.6, 53.1, 52.7, 20.5, 14.4. Optical Rotation: [α]<sup>25</sup><sub>D</sub> = -31.5 (c 0.11, CH<sub>2</sub>Cl<sub>2</sub>). HRMS (ESI-quadrupole) *m/z*: [M+H]<sup>+</sup> Calcd. for C<sub>22</sub>H<sub>21</sub>N<sub>4</sub>O<sub>2</sub>S<sub>4</sub> 501.0542; found: 501.0539.

**Methyl *N*2-((benzyloxy)carbonyl)-*N*6-(2-phenylethanethioyl)-*L*-lysyl-*L*-valinate (3dg)**

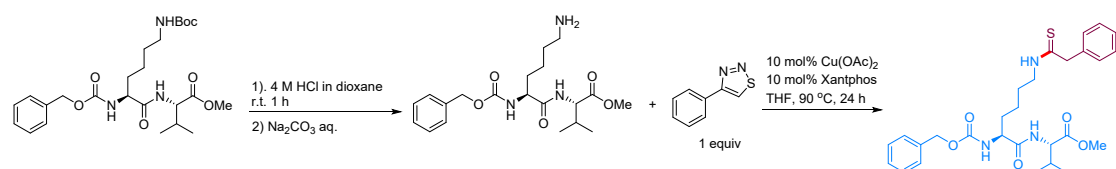

The modified procedure B conducted with methyl *N*2-((benzyloxy)carbonyl)-*N*6-(tert-butoxycarbonyl)-*L*-lysyl-*L*-valinate (124 mg, 0.25 mmol) in 4M HCl in dioxane (2 mL) at r.t. for 1 h. TLC monitored until quant. transformation. Removing the excess

HCl under reduced pressure and free amine was obtained by neutralization of sodium carbonate aqueous solution and, extracted by DCM, concentrated in vacuo. 4-phenyl-1,2,3-thiadiazole (32 mg, 0.19 mmol), Cu(OAc)<sub>2</sub> (3.6 mg, 0.019 mmol), Xantphos (10 mg, 0.019 mmol) and methyl ((benzyloxy)carbonyl)-*L*-lysyl-*L*-valinate (75 mg, 0.19 mmol) was added in THF (1 mL) at 90 °C for 8 h gave methyl *N*2-((benzyloxy)carbonyl)-*N*6-(2-phenylethanes-thioyl)-*L*-lysyl-*L*-valinate as yellow oil (62.5 mg, 63%). <sup>1</sup>H NMR (400 MHz, CDCl<sub>3</sub>) δ 8.25 (d, *J* = 6.7 Hz, 1H), 7.31 (dd, *J* = 15.7, 8.1 Hz, 10H), 6.81 (d, *J* = 8.5 Hz, 1H), 5.38 – 4.83 (m, 3H), 4.46 (dd, *J* = 8.6, 4.9 Hz, 1H), 4.10 (dt, *J* = 30.8, 9.4 Hz, 2H), 3.82 – 3.50 (m, 3H), 3.37 – 2.93 (m, 1H), 2.14 (dt, *J* = 13.6, 6.8 Hz, 1H), 2.02 – 1.88 (m, 1H), 1.88 – 1.70 (m, 1H), 1.47 (d, *J* = 5.7 Hz, 2H), 1.36 – 1.09 (m, 4H), 1.09 – 0.66 (m, 6H). <sup>13</sup>C NMR (126 MHz, CDCl<sub>3</sub>) δ 202.56, 172.08, 170.35, 156.63, 136.56, 135.30, 129.20, 129.07, 128.52, 128.10, 127.71, 66.68, 58.42, 57.48, 52.92, 52.25, 40.26, 30.76, 30.31, 29.69, 29.30, 21.90, 18.98, 17.72. Optical Rotation: [α]<sub>D</sub><sup>25</sup> = -112.4 (c 0.11, CH<sub>2</sub>Cl<sub>2</sub>). HRMS (ESI-quadrupole) *m/z*: [M+H]<sup>+</sup> Calcd. for C<sub>28</sub>H<sub>38</sub>N<sub>3</sub>O<sub>5</sub>S 528.2527; found: 528.2521.

### *N*-(2-(Diphenylphosphanyl)benzyl)-2-phenylethanes-thioamide (3dh)

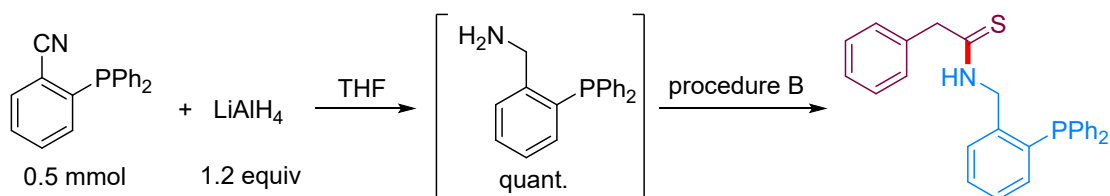

The modified procedure B was conducted. Degassed and dry THF was added under nitrogen to a round-bottomed flask equipped with a magnetic stirring bar and containing pre-weighed LiAlH<sub>4</sub> (1.2 eq.). The suspension was cooled down to 0 °C and 2-(diphenylphosphino)benzonitrile (287 mg, 0.5 mmol) was added portion-wise. After 2 additional hours at 0 °C it was stirred at room temperature overnight. It was then cooled down back to 0 °C and slowly quenched with aqueous sodium hydroxide. After THF removal, the remaining residue was dissolved in DCM, passed through a celite plug. The DCM solution was washed with water, dried over sodium sulfate and concentrated to dryness and further dried under high vacuum to afford crude product



next, which mixed with 4-phenyl-1,2,3-thiadiazole (81 mg, 0.5 mmol), Cu(OAc)<sub>2</sub> (9 mg, 0.05 mmol), Xantphos (28 mg, 0.05 mmol) in THF (2.5 mL) at 90 °C for 8 h gave *N*-(2-(diphenylphosphaneyl)benzyl)-2-phenylethanethioamide as yellow oil (93.5 mg, 44%). <sup>1</sup>H NMR (500 MHz, CDCl<sub>3</sub>) δ 7.37 – 7.30 (m, 7H), 7.30 – 7.22 (m, 5H), 7.21 – 7.15 (m, 5H), 7.12 – 7.01 (m, 2H), 6.98 – 6.73 (m, 1H), 5.01 (d, *J* = 5.7 Hz, 2H), 3.84 (s, 2H). <sup>13</sup>C NMR (126 MHz, CDCl<sub>3</sub>) δ 201.6, 140.5 (d, *J* = 25.4 Hz, 1C), 136.2 (d, *J* = 14.1 Hz, 1C), 135.8 (d, *J* = 8.8 Hz, 1C), 135.1, 134.0, 133.9, 133.8, 132.0 (d, *J* = 10.0 Hz, 1C), 130.3 (d, *J* = 5.6 Hz, 1C), 129.4, 129.1, 129.1, 128.8, 128.8, 128.4, 127.6, 125.9, 53.0, 49.0 (d, *J* = 19.3 Hz, 1C). <sup>31</sup>P NMR (202 MHz, CDCl<sub>3</sub>) δ -15.5. HRMS (ESI-quadrupole) *m/z*: [M+H]<sup>+</sup> Calcd. for C<sub>27</sub>H<sub>25</sub>NPS 426.1440; found: 426.1443.

**2-Phenyl-*N*-((*R*)-quinolin-4-yl((1*S*,2*R*,4*S*,5*R*)-5-vinylquinuclidin-2-yl)methyl)ethanethioamide (3di)**

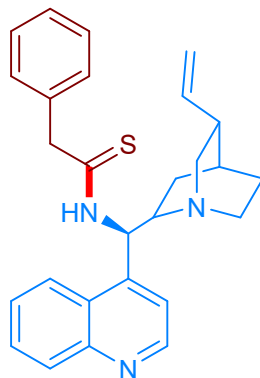

The general procedure B conducted with 4-phenyl-1,2,3-thiadiazole (81 mg, 0.5 mmol), Cu(OAc)<sub>2</sub> (9 mg, 0.05 mmol), Xantphos (28 mg, 0.05 mmol) and (*R*)-quinolin-4-yl((1*S*,2*R*,4*S*,5*R*)-5-vinylquinuclidin-2-yl)methanamine (147 mg, 0.5 mmol) in THF (2.5 mL) at 90 °C for 8 h gave 2-phenyl-*N*-((*R*)-quinolin-4-yl((1*S*,2*R*,4*S*,5*R*)-5-vinylquinuclidin-2-yl)methyl)ethanethioamide as yellow oil (100.3 mg, 47%). <sup>1</sup>H NMR (500 MHz, CDCl<sub>3</sub>) δ 8.89 (s, 1H), 8.79 (d, *J* = 4.4 Hz, 1H), 8.21 (s, 1H), 8.10 (d, *J* = 8.4 Hz, 1H), 7.68 (t, *J* = 7.6 Hz, 1H), 7.54 (t, *J* = 7.5 Hz, 1H), 7.35 (t, *J* = 7.2 Hz, 2H), 7.29 (dd, *J* = 14.7, 7.3 Hz, 3H), 7.20 (d, *J* = 3.4 Hz, 1H), 5.89 (ddd, *J* = 17.1, 10.5, 6.4 Hz, 1H), 5.57 (s, 1H), 5.14 (dd, *J* = 34.4, 13.9 Hz, 2H), 4.09 (q, *J* = 15.6 Hz, 2H), 2.93 (dd, *J* = 17.7, 8.6 Hz, 1H), 2.77 (dd, *J* = 16.2, 7.7 Hz, 3H), 2.63 (dd, *J* = 14.0, 7.4 Hz, 1H), 2.26 (dd, *J* = 15.9, 7.7 Hz, 1H), 1.49 (dd, *J* = 9.9, 7.4 Hz, 1H), 1.37 (ddd, *J* = 14.5, 9.1, 4.4 Hz, 2H), 0.96 – 0.85 (m, 1H). <sup>13</sup>C NMR (126 MHz, CDCl<sub>3</sub>) δ 201.9, 149.9, 148.4, 139.8, 135.7, 130.3, 129.3, 129.1, 128.9, 127.5,

126.5, 123.7, 115.2, 53.1, 48.8, 46.8, 39.0, 27.2, 26.4, 25.4. Optical Rotation:  $[\alpha]^{25}_D = 412.3$  (c 0.27,  $\text{CH}_2\text{Cl}_2$ ). HRMS (ESI-quadrupole)  $m/z$ :  $[\text{M}+\text{H}]^+$  Calcd. for  $\text{C}_{27}\text{H}_{30}\text{N}_3\text{S}$  428.2155; found: 428.2156.

### ***N*-methyl-*N*-phenyl-2-(*p*-tolyl)ethanethioamide (3ea)**

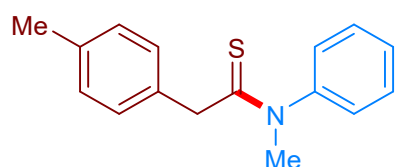

The general procedure D conducted with 4-(*p*-tolyl)-1,2,3-thiadiazole (88 mg, 0.5 mmol),  $\text{Cu}(\text{OAc})_2$  (9 mg, 0.05 mmol) and *N*-methylaniline (54 mg, 0.5 mmol) in  $\text{CH}_3\text{CN}$  (2.5 mL) at 90 °C for 8 h gave *N*-methyl-*N*-phenyl-2-(*p*-tolyl)ethanethioamide as yellow oil (110 mg, 86%).  $^1\text{H}$  NMR (500 MHz,  $\text{CDCl}_3$ )  $\delta$  7.34 (s, 3H), 7.10 – 6.93 (m, 4H), 6.89 (d,  $J = 7.6$  Hz, 2H), 3.95 (s, 2H), 3.70 (s, 3H), 2.26 (s, 3H).  $^{13}\text{C}$  NMR (126 MHz,  $\text{CDCl}_3$ )  $\delta$  203.1, 145.4, 136.2, 133.8, 129.7, 128.9, 128.6, 128.5, 126.0, 50.3, 46.3, 21.1. HRMS (ESI-quadrupole)  $m/z$ :  $[\text{M}+\text{H}]^+$  Calcd. for  $\text{C}_{16}\text{H}_{18}\text{NS}$  256.1154; found: 256.1152.

### **2-(4-Methoxyphenyl)-*N*-methyl-*N*-phenylethanethioamide (3eb)**

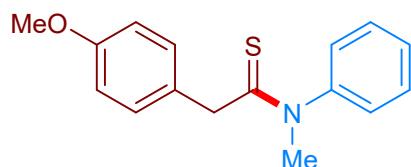

The general procedure D conducted with 4-(4-methoxyphenyl)-1,2,3-thiadiazole (96 mg, 0.5 mmol),  $\text{Cu}(\text{OAc})_2$  (9 mg, 0.05 mmol) and *N*-methylaniline (54 mg, 0.5 mmol) in  $\text{CH}_3\text{CN}$  (2.5 mL) at 90 °C for 8 h gave 2-(4-methoxyphenyl)-*N*-methyl-*N*-phenylethanethioamide as yellow oil (114 mg, 84%).  $^1\text{H}$  NMR (500 MHz,  $\text{CDCl}_3$ )  $\delta$  7.36 (d,  $J = 4.8$  Hz, 3H), 7.00 (d,  $J = 6.9$  Hz, 2H), 6.91 (d,  $J = 8.0$  Hz, 2H), 6.70 (d,  $J = 7.9$  Hz, 2H), 3.94 (s, 2H), 3.74 (s, 3H), 3.70 (s, 3H).  $^{13}\text{C}$  NMR (126 MHz,  $\text{CDCl}_3$ )  $\delta$  203.3, 158.4, 145.4, 129.7, 129.7, 128.8, 128.5, 126.0, 113.5, 55.2, 49.8, 46.3. HRMS (ESI-quadrupole)  $m/z$ :  $[\text{M}+\text{H}]^+$  Calcd. for  $\text{C}_{16}\text{H}_{18}\text{NOS}$  272.1104; found: 272.1099.

### **2-(4-Chlorophenyl)-*N*-methyl-*N*-phenylethanethioamide (3ec)**

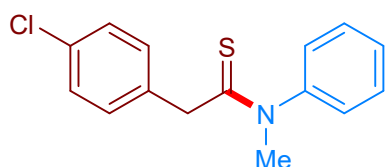

The general procedure D conducted with 4-(4-chlorophenyl)-1,2,3-thiadiazole (98 mg, 0.5 mmol),

Cu(OAc)<sub>2</sub> (9 mg, 0.05 mmol) and *N*-methylaniline (54 mg, 0.5 mmol) in CH<sub>3</sub>CN (2.5 mL) at 90 °C for 8 h gave 2-(4-chlorophenyl)-*N*-methyl-*N*-phenylethanethioamide as yellow oil (122 mg, 89%). <sup>1</sup>H NMR (500 MHz, CDCl<sub>3</sub>) δ 7.48 (d, *J* = 4.6 Hz, 1H), 7.38 (t, *J* = 7.4 Hz, 2H), 7.24 (d, *J* = 19.1 Hz, 1H), 7.10 (d, *J* = 8.2 Hz, 2H), 6.80 (d, *J* = 8.2 Hz, 2H), 6.42 (s, 1H), 5.12 (q, *J* = 7.8 Hz, 2H), 3.72 (s, 3H). <sup>13</sup>C NMR (126 MHz, CDCl<sub>3</sub>) δ 205.3, 143.7, 138.9, 134.0, 129.9, 129.1, 128.7, 128.4, 126.8, 73.4, 46.9. HRMS (ESI-quadrupole) *m/z*: [M+H]<sup>+</sup> Calcd. for C<sub>15</sub>H<sub>15</sub>NCIS 276.0608; found: 276.0254.

### 2-(4-Bromophenyl)-*N*-methyl-*N*-phenylethanethioamide (3ed)

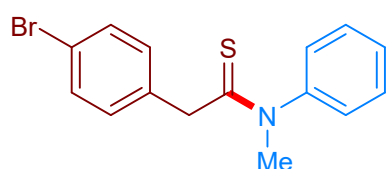

The general procedure D conducted with 4-(4-bromophenyl)-1,2,3-thiadiazole (120 mg, 0.5 mmol), Cu(OAc)<sub>2</sub> (9 mg, 0.05 mmol) and *N*-methylaniline (54 mg, 0.5 mmol) in CH<sub>3</sub>CN (2.5 mL) at 90 °C for 8 h gave 2-(4-bromophenyl)-*N*-methyl-*N*-phenylethanethioamide as yellow oil (120 mg, 75%). <sup>1</sup>H NMR (500 MHz, CDCl<sub>3</sub>) δ 7.38 (d, *J* = 4.5 Hz, 3H), 7.28 (d, *J* = 7.9 Hz, 2H), 7.12 – 6.95 (m, 2H), 6.88 (d, *J* = 7.9 Hz, 2H), 3.94 (s, 2H), 3.71 (s, 3H). <sup>13</sup>C NMR (126 MHz, CDCl<sub>3</sub>) δ 201.9, 145.3, 135.7, 131.2, 130.5, 129.9, 128.7, 125.9, 120.7, 50.0, 46.3. HRMS (ESI-quadrupole) *m/z*: [M+H]<sup>+</sup> Calcd. for C<sub>15</sub>H<sub>15</sub>NBrS 320.0103; found: 320.0099.

### 2-(4-cyanophenyl)-*N*-methyl-*N*-phenylethanethioamide (3ee)

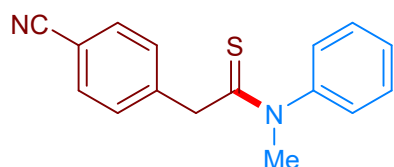

The general procedure D conducted with 4-(1,2,3-thiadiazol-4-yl)benzonitrile (94 mg, 0.5 mmol), Cu(OAc)<sub>2</sub> (9 mg, 0.05 mmol) and *N*-methylaniline (54 mg, 0.5 mmol) in CH<sub>3</sub>CN (2.5 mL) at 90 °C for 8 h gave 2-(4-cyanophenyl)-*N*-methyl-*N*-phenylethanethioamide as yellow solid (89 mg, 67%). <sup>1</sup>H NMR (500 MHz, CDCl<sub>3</sub>) δ 7.60 (s, 1H), 7.54 (d, *J* = 8.1 Hz, 2H), 7.37 (t, *J* = 7.2 Hz, 2H), 7.33 (d, *J* = 6.9 Hz, 1H), 7.27 (dd, *J* = 12.4, 7.8 Hz, 4H), 4.90 (s, 2H), 4.17 (s, 2H). <sup>13</sup>C NMR (126 MHz, CDCl<sub>3</sub>) δ 203.5, 141.7, 134.9, 132.5, 129.5, 129.3, 128.2, 128.0, 118.6, 111.5, 53.1, 48.9. HRMS (ESI-quadrupole) *m/z*: [M+H]<sup>+</sup> Calcd. for C<sub>16</sub>H<sub>15</sub>N<sub>2</sub>S 267.0950;

found: 267.0949.

### 2-(3-Fluorophenyl)-*N*-methyl-*N*-phenylethanethioamide (3ef)

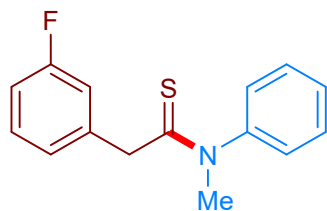

The general procedure D conducted with 4-(3-fluorophenyl)-1,2,3-thiadiazole (90 mg, 0.5 mmol), Cu(OAc)<sub>2</sub> (9 mg, 0.05 mmol) and *N*-methylaniline (54 mg, 0.5 mmol) in CH<sub>3</sub>CN (2.5 mL) at 90 °C for 8 h gave 2-(3-fluorophenyl)-*N*-methyl-*N*-phenylethanethioamide as yellow oil (105 mg, 81%). <sup>1</sup>H NMR (500 MHz, CDCl<sub>3</sub>) δ 7.36 (d, *J* = 1.5 Hz, 3H), 7.11 (dd, *J* = 14.5, 7.1 Hz, 1H), 7.00 (s, 2H), 6.85 (t, *J* = 8.4 Hz, 1H), 6.75 (d, *J* = 7.5 Hz, 2H), 4.00 (s, 2H), 3.72 (s, 3H). <sup>19</sup>F NMR (471 MHz, CDCl<sub>3</sub>) δ -113.42 (s, 1F). <sup>13</sup>C NMR (126 MHz, CDCl<sub>3</sub>) δ 201.7, 162.5 (d, *J* = 245.4 Hz), 145.2, 139.1 (d, *J* = 7.5 Hz), 129.8, 129.5 (d, *J* = 8.3 Hz), 128.7, 125.9, 124.4 (d, *J* = 2.7 Hz), 115.6 (d, *J* = 22.0 Hz), 113.6 (d, *J* = 21.0 Hz), 50.3 (d, *J* = 1.3 Hz), 46.3. HRMS (ESI-quadrupole) *m/z*: [M+H]<sup>+</sup> Calcd. for C<sub>15</sub>H<sub>15</sub>NFS 260.0904; found: 260.0900.

### (Benzo[*d*][1,3]dioxol-5-yl)-*N*-methyl-*N*-phenylethanethioamide (3eg)

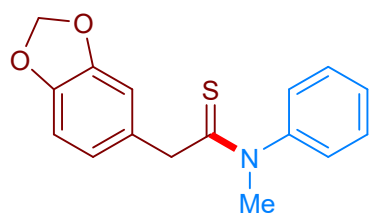

The general procedure D conducted with 4-(benzo[*d*][1,3]dioxol-5-yl)-1,2,3-thiadiazole (103 mg, 0.5 mmol), Cu(OAc)<sub>2</sub> (9 mg, 0.05 mmol) and *N*-methylaniline (54 mg, 0.5 mmol) in CH<sub>3</sub>CN (2.5 mL) at 90 °C for 8 h gave 2-(benzo[*d*][1,3]dioxol-5-yl)-*N*-methyl-*N*-phenylethanethioamide as yellow solid (80 mg, 56%). <sup>1</sup>H NMR (500 MHz, CDCl<sub>3</sub>) δ 7.31 (d, *J* = 5.6 Hz, 3H), 6.95 (d, *J* = 7.1 Hz, 2H), 6.55 (s, 1H), 6.52 (d, *J* = 7.9 Hz, 1H), 6.25 (d, *J* = 7.9 Hz, 1H), 5.82 (s, 2H), 3.84 (s, 2H), 3.64 (s, 3H). <sup>13</sup>C NMR (126 MHz, CDCl<sub>3</sub>) δ 202.9, 147.4, 146.3, 145.4, 130.4, 129.7, 128.6, 126.0, 121.9, 109.2, 107.9, 100.9, 50.2, 46.3. HRMS (ESI-quadrupole) *m/z*: [M+H]<sup>+</sup> Calcd. for C<sub>16</sub>H<sub>16</sub>NO<sub>2</sub>S 286.0896; found: 286.0891.

### 1-(Benzofuran-2-yl)-*N*-methyl-*N*-phenylethanethioamide (3eh)

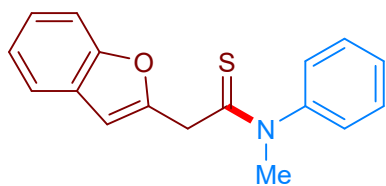

The general procedure D conducted with 4-(benzofuran-2-yl)-1,2,3-thiadiazole (101 mg, 0.5 mmol), Cu(OAc)<sub>2</sub> (9 mg, 0.05 mmol) and *N*-methylaniline (54 mg, 0.5 mmol) in CH<sub>3</sub>CN (2.5 mL)

at 90 °C for 8 h gave 1-(benzofuran-2-yl)-*N*-methyl-*N*-phenylethanethioamide as yellow oil (98 mg, 69%). <sup>1</sup>H NMR (400 MHz, CDCl<sub>3</sub>) δ 7.50 (dd, *J* = 9.8, 2.8 Hz, 1H), 7.42 (ddd, *J* = 8.8, 6.1, 3.9 Hz, 4H), 7.31 – 7.12 (m, 4H), 6.50 (s, 1H), 4.13 (s, 2H), 3.80 (s, 3H). <sup>13</sup>C NMR (101 MHz, CDCl<sub>3</sub>) δ 198.6, 154.7, 153.6, 145.3, 130.0, 128.8, 128.6, 125.6, 123.7, 122.6, 120.7, 111.0, 104.7, 46.3, 44.0. HRMS (ESI-quadrupole) *m/z*: [M+H]<sup>+</sup> Calcd. for C<sub>17</sub>H<sub>16</sub>NOS 282.0947; found: 282.0944.

### Cyclohexyl-*N*-methyl-*N*-phenylethanethioamide (3ei)

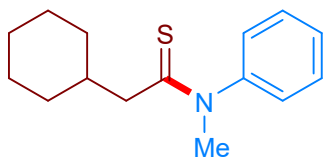

The general procedure D conducted with 4-cyclohexyl-1,2,3-thiadiazole (84 mg, 0.5 mmol), Cu(OAc)<sub>2</sub> (9 mg, 0.05 mmol) and *N*-methylaniline (54 mg, 0.5 mmol) in

CH<sub>3</sub>CN (2.5 mL) at 90 °C for 8 h gave cyclohexyl-*N*-methyl-*N*-phenylethanethioamide as yellow oil (90 mg, 73%). <sup>1</sup>H NMR (400 MHz, CDCl<sub>3</sub>) δ 7.39 (dt, *J* = 27.6, 7.4 Hz, 3H), 7.10 (d, *J* = 7.6 Hz, 2H), 3.70 (s, 3H), 2.35 (d, *J* = 7.0 Hz, 2H), 2.12 – 1.92 (m, 1H), 1.59 (dd, *J* = 31.5, 11.0 Hz, 5H), 1.16 (d, *J* = 12.7 Hz, 2H), 1.08 – 0.87 (m, 1H), 0.65 (d, *J* = 12.2 Hz, 2H). <sup>13</sup>C NMR (101 MHz, CDCl<sub>3</sub>) δ 205.3, 145.7, 129.9, 128.4, 126.0, 50.7, 46.0, 39.5, 32.7, 26.2, 26.1. HRMS (ESI-quadrupole) *m/z*: [M+H]<sup>+</sup> Calcd. for C<sub>15</sub>H<sub>22</sub>NS 248.1467; found: 248.1465.

### *N*,3,3-Trimethyl-*N*-phenylbutanethioamide (3ej)

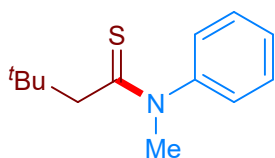

The general procedure D conducted with 4-(tert-butyl)-1,2,3-thiadiazole (71 mg, 0.5 mmol), Cu(OAc)<sub>2</sub> (9 mg, 0.05 mmol) and *N*-methylaniline (54 mg, 0.5 mmol) in CH<sub>3</sub>CN (2.5 mL) at

90 °C for 8 h gave *N*,3,3-trimethyl-*N*-phenylbutanethioamide as yellow oil (78 mg, 71%). <sup>1</sup>H NMR (400 MHz, CDCl<sub>3</sub>) δ 7.41 (dd, *J* = 24.4, 6.7 Hz, 3H), 7.17 (d, *J* = 7.0 Hz, 2H), 3.75 (s, 3H), 2.73 (s, 2H), 0.94 (s, 9H). <sup>13</sup>C NMR (101 MHz, CDCl<sub>3</sub>) δ 204.4,

146.6, 129.7, 128.1, 126.4, 54.8, 46.6, 33.0, 30.3. HRMS (ESI-quadrupole)  $m/z$ :  $[M+H]^+$  Calcd. for  $C_{13}H_{20}NS$  222.1311; found: 222.1309.

### Ethyl 3-(methyl(phenyl)amino)-3-thioxopropanoate (3ek)

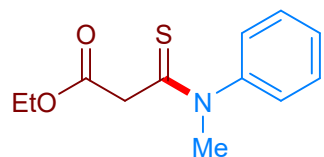

The general procedure D conducted with ethyl 1,2,3-thiadiazole-4-carboxylate (79 mg, 0.5 mmol),  $Cu(OAc)_2$  (9 mg, 0.05 mmol) and *N*-methylaniline (54 mg, 0.5 mmol) in  $CH_3CN$  (2.5 mL) at 90 °C for 8 h gave ethyl 3-(methyl(phenyl)amino)-3-thioxopropanoate as yellow oil (78 mg, 71%).  $^1H$  NMR (400 MHz,  $CDCl_3$ )  $\delta$  7.43 (dq,  $J = 14.5, 7.2$  Hz, 3H), 7.25 (d,  $J = 7.0$  Hz, 2H), 4.09 (q,  $J = 7.1$  Hz, 2H), 3.75 (s, 3H), 3.67 (s, 2H), 1.20 (t,  $J = 7.1$  Hz, 3H).  $^{13}C$  NMR (101 MHz,  $CDCl_3$ )  $\delta$  195.5, 168.0, 145.3, 130.0, 128.9, 125.6, 61.3, 50.4, 45.8, 14.0. HRMS (ESI-quadrupole)  $m/z$ :  $[M+H]^+$  Calcd. for  $C_{12}H_{16}NO_2S$  238.0896; found: 238.0894.

### 2,2'-(1,3-Phenylene)bis(*N*-methyl-*N*-phenylethanethioamide) (3el)

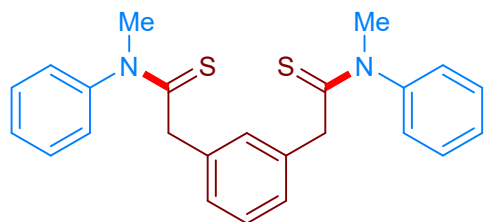

The general procedure D conducted with 1,3-di(1,2,3-thiadiazol-4-yl)benzene (123 mg, 0.5 mmol),  $Cu(OAc)_2$  (9 mg, 0.05 mmol) and *N*-methylaniline (54 mg, 0.5 mmol) in  $CH_3CN$  (2.5 mL) at 90 °C for 8 h gave 2,2'-(1,3-phenylene)bis(*N*-methyl-*N*-phenylethanethioamide) as yellow oil (109 mg, 54%).  $^1H$  NMR (400 MHz,  $CDCl_3$ )  $\delta$  7.36 (s, 6H), 7.02 (d,  $J = 18.4$  Hz, 5H), 6.82 (d,  $J = 7.4$  Hz, 2H), 6.71 (s, 1H), 3.92 (s, 4H), 3.74 (s, 6H).  $^{13}C$  NMR (101 MHz,  $CDCl_3$ )  $\delta$  202.7, 145.4, 136.8, 129.7, 128.8, 128.5, 127.9, 127.0, 126.0, 50.4, 46.3. HRMS (ESI-quadrupole)  $m/z$ :  $[M+H]^+$  Calcd. for  $C_{24}H_{25}N_2S_2$  405.1454; found: 405.1450.

### 2-([1,1'-Biphenyl]-4-yl)-*N*-(4-methoxybenzyl)ethanethioamide (3em)

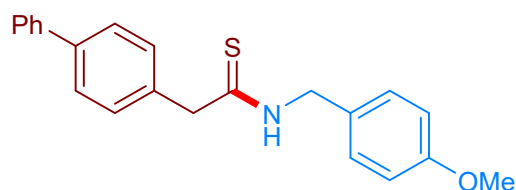

The general procedure B conducted with 4-([1,1'-biphenyl]-4-yl)-1,2,3-thiadiazole (119 mg, 0.5 mmol),  $Cu(OAc)_2$  (9 mg, 0.05

mmol), Xantphos (28 mg, 0.05 mmol) and (4-methoxyphenyl)methanamine (69 mg, 0.5 mmol) in THF (2.5 mL) at 90 °C for 8 h gave 2-([1,1'-biphenyl]-4-yl)-*N*-(4-methoxybenzyl)ethanethioamide as yellow oil (91.9 mg, 53%). <sup>1</sup>H NMR (500 MHz, CDCl<sub>3</sub>) δ 7.68 – 7.53 (m, 4H), 7.43 (t, *J* = 7.6 Hz, 3H), 7.33 (dt, *J* = 7.7, 7.1 Hz, 3H), 7.13 (t, *J* = 8.1 Hz, 2H), 6.82 (d, *J* = 8.5 Hz, 2H), 4.76 (d, *J* = 5.2 Hz, 1.18H), 4.34 (d, *J* = 5.7 Hz, 0.67H), 4.18 (s, 1.22H), 3.77 (d, *J* = 11.1 Hz, 3H), 3.62 (s, 0.73H). <sup>13</sup>C NMR (126 MHz, CDCl<sub>3</sub>) δ 201.9, 159.4, 159.0, 140.7, 140.4, 134.0, 132.1, 129.9, 129.3, 129.0, 128.9, 127.8, 127.7, 127.5, 127.4, 127.0, 114.3, 114.1, 55.3, 52.7, 49.8, 43.4, 43.2, 29.7. HRMS (ESI-quadrupole) *m/z*: [M+H]<sup>+</sup> Calcd. for C<sub>22</sub>H<sub>22</sub>NOS 348.1417; found: 348.1419.

#### ***N*-(4-Methoxybenzyl)-2-(4-(trifluoromethoxy)phenyl)ethanethioamide (3en)**

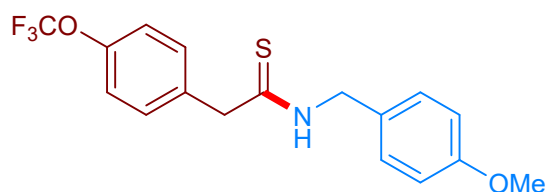

The general procedure B conducted with 4-(4-(trifluoromethoxy)phenyl)-1,2,3-thiadiazole (123 mg, 0.5 mmol), Cu(OAc)<sub>2</sub> (9 mg, 0.05 mmol), Xantphos

(28 mg, 0.05 mmol) and (4-methoxyphenyl)methanamine (69 mg, 0.5 mmol) in THF (2.5 mL) at 90 °C for 8 h gave *N*-(4-methoxybenzyl)-2-(4-(trifluoromethoxy)phenyl)ethanethioamide as yellow oil (150.1 mg, 85%). <sup>1</sup>H NMR (500 MHz, CDCl<sub>3</sub>) δ 7.53 (s, 1H), 7.30 (d, *J* = 8.6 Hz, 2H), 7.14 (dd, *J* = 17.8, 8.4 Hz, 4H), 6.82 (d, *J* = 8.6 Hz, 2H), 4.71 (d, *J* = 5.2 Hz, 2H), 4.04 (s, 2H), 3.75 (s, 3H). <sup>19</sup>F NMR (471 MHz, CDCl<sub>3</sub>) δ -57.84 (s, 3F). <sup>13</sup>C NMR (126 MHz, CDCl<sub>3</sub>) δ 201.3, 159.4, 148.6, 134.3, 130.7, 129.4, 127.9, 121.4, 120.5 (q, *J* = 257.5 Hz), 114.3, 55.3, 52.1, 49.9. HRMS (ESI-quadrupole) *m/z*: [M+H]<sup>+</sup> Calcd. for C<sub>17</sub>H<sub>17</sub>F<sub>3</sub>NO<sub>2</sub>S 356.0927; found: 356.0930.

#### ***N*-(4-methoxybenzyl)-2-(4-(methylthio)phenyl)ethanethioamide (3eo)**

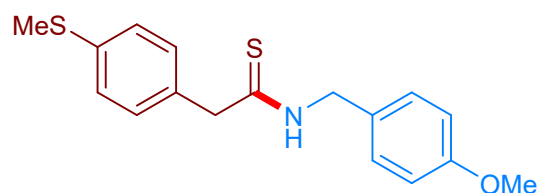

The general procedure B conducted with 4-(4-(methylthio)phenyl)-1,2,3-thiadiazole (104 mg, 0.5 mmol), Cu(OAc)<sub>2</sub> (9 mg, 0.05 mmol), Xantphos (28 mg, 0.05 mmol)

and (4-methoxyphenyl)methanamine (69 mg, 0.5 mmol) in THF (2.5 mL) at 90 °C for 8 h gave *N*-(4-methoxybenzyl)-2-(4-(methylthio)phenyl)ethanethioamide as yellow oil (129 mg, 81%). <sup>1</sup>H NMR (500 MHz, CDCl<sub>3</sub>) δ 7.32 (s, 1H), 7.24 – 7.07 (m, 6H), 6.82 (d, *J* = 8.6 Hz, 2H), 4.72 (d, *J* = 5.2 Hz, 2H), 4.06 (s, 2H), 3.76 (s, 3H), 2.45 (s, 3H). <sup>13</sup>C NMR (126 MHz, CDCl<sub>3</sub>) δ 201.8, 159.4, 138.3, 131.6, 129.9, 129.4, 128.0, 127.0, 114.3, 55.3, 52.5, 49.8, 15.7. HRMS (ESI-quadrupole) *m/z*: [M+H]<sup>+</sup> Calcd. for C<sub>17</sub>H<sub>20</sub>NOS<sub>2</sub> 318.0981; found: 318.0978.

***N*-(4-methoxybenzyl)-2-(4-(4,4,5,5-tetramethyl-1,3,2-dioxaborolan-2-yl)phenyl)ethanethioamide (3ep)**

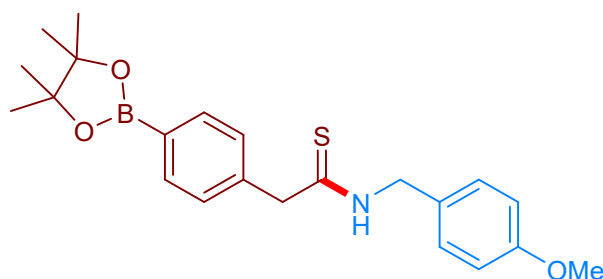

The general procedure B conducted with (4-(1,2,3-thiadiazol-4-yl)phenyl)(morpholino)methanone (144 mg, 0.5 mmol), Cu(OAc)<sub>2</sub> (9 mg, 0.05 mmol), Xantphos (28 mg, 0.05 mmol) and (4-methoxyphenyl)methanamine (69 mg, 0.5 mmol) in THF (2.5 mL) at 90 °C for 8 h gave *N*-(4-methoxybenzyl)-2-(4-(4,4,5,5-tetramethyl-1,3,2-dioxaborolan-2-yl)phenyl)ethanethioamide as yellow oil (79.4 mg, 40%). <sup>1</sup>H NMR (500 MHz, CDCl<sub>3</sub>) δ 7.70 (d, *J* = 6.1 Hz, 2H), 7.18 (d, *J* = 5.5 Hz, 3H), 7.03 (d, *J* = 6.7 Hz, 2H), 6.74 (d, *J* = 6.6 Hz, 2H), 4.64 (s, 2H), 4.07 (s, 2H), 3.69 (s, 3H), 1.26 (s, 12H). <sup>13</sup>C NMR (126 MHz, CDCl<sub>3</sub>) δ 201.6, 159.3, 138.1, 135.6, 129.3, 128.8, 128.0, 114.3, 84.0, 55.3, 53.2, 49.8, 24.9. HRMS (ESI-quadrupole) *m/z*: [M]<sup>+</sup> Calcd. for C<sub>22</sub>H<sub>28</sub>BNO<sub>3</sub>S 397.1883; found: 397.1996.

***N*-(4-methoxybenzyl)-2-(4-(morpholine-4-carbonyl)phenyl)ethanethioamide (3eq)**

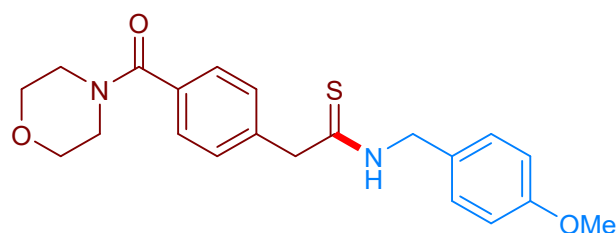

The general procedure B conducted with (4-(1,2,3-thiadiazol-4-yl)phenyl)(morpholino)methanone (138 mg, 0.5 mmol), Cu(OAc)<sub>2</sub> (9 mg, 0.05 mmol), Xantphos (28 mg, 0.05 mmol) and (4-methoxyphenyl)methanamine



(69 mg, 0.5 mmol) in THF (2.5 mL) at 90 °C for 8 h gave *N*-(4-methoxybenzyl)-2-(4-(morpholine-4-carbonyl)phenyl)ethanethioamide as yellow oil (147.8 mg, 77%). <sup>1</sup>H NMR (500 MHz, CDCl<sub>3</sub>) δ 8.67 (s, 1H), 7.21 (d, *J* = 5.8 Hz, 4H), 7.19 – 7.04 (m, 2H), 6.81 (dd, *J* = 9.2, 2.5 Hz, 2H), 4.69 (d, *J* = 5.2 Hz, 2H), 4.05 – 3.90 (m, 2H), 3.86 – 3.72 (m, 3H), 3.69 – 3.28 (m, 8H). <sup>13</sup>C NMR (126 MHz, CDCl<sub>3</sub>) δ 201.0, 170.2, 159.2, 138.5, 133.7, 129.6, 129.2, 128.3, 127.4, 114.1, 66.8, 55.3, 52.1, 49.7. HRMS (ESI-quadrupole) *m/z*: [M+H]<sup>+</sup> Calcd. for C<sub>21</sub>H<sub>25</sub>N<sub>2</sub>O<sub>3</sub>S 385.1580; found: 385.1581.

### *N*-(4-Methoxybenzyl)-3-morpholino-3-oxopropanethioamide (3er)

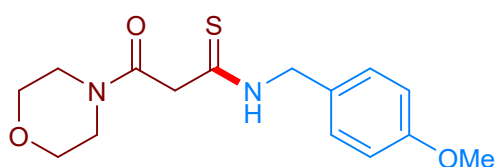

The general procedure B conducted with morpholino(1,2,3-thiadiazol-4-yl)methanone (100 mg, 0.5 mmol), Cu(OAc)<sub>2</sub> (9 mg, 0.05 mmol), Xantphos (28 mg, 0.05 mmol) and (4-methoxyphenyl)methanamine (69 mg, 0.5 mmol) in THF (2.5 mL) at 90 °C for 8 h gave *N*-(4-methoxybenzyl)-2-(4-(trifluoromethoxy)phenyl)ethanethioamide as yellow oil (72.4 mg, 47%). <sup>1</sup>H NMR (500 MHz, CDCl<sub>3</sub>) δ 9.78 (s, 1H), 7.79 – 7.03 (m, 2H), 6.80 (d, *J* = 8.2 Hz, 2H), 4.69 (d, *J* = 5.2 Hz, 2H), 3.78 (s, 2H), 3.72 (d, *J* = 0.6 Hz, 3H), 3.67 – 3.53 (m, 6H), 3.53 – 3.46 (m, 2H). <sup>13</sup>C NMR (126 MHz, CDCl<sub>3</sub>) δ 193.9, 167.1, 159.3, 129.5, 128.1, 114.2, 66.6, 66.5, 55.3, 49.7, 47.8, 46.7, 42.3. HRMS (ESI-quadrupole) *m/z*: [M+H]<sup>+</sup> Calcd. for C<sub>15</sub>H<sub>21</sub>N<sub>2</sub>O<sub>3</sub>S 309.1267; found: 309.1263.

### *N*-(2,6-Dioxopiperidin-3-yl)-2-phenylethanethioamide (3es)

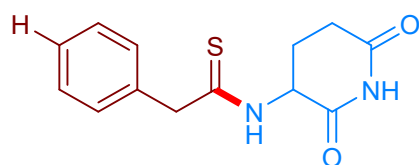

The general procedure B conducted with 4-phenyl-1,2,3-thiadiazole (81 mg, 0.5 mmol), Cu(OAc)<sub>2</sub> (9 mg, 0.05 mmol), Xantphos (28 mg, 0.05 mmol) and 3-aminopiperidine-2,6-dione (64 mg, 0.5 mmol) in THF (2.5 mL) at 90 °C for 8 h gave *N*-(2,6-dioxopiperidin-3-yl)-2-phenylethanethioamide as yellow oil (103.5 mg, 79%). <sup>1</sup>H NMR (500 MHz, DMSO) δ 11.00 (s, 1H), 10.51 (s, 1H), 8.27 – 6.55 (m, 5H), 5.37 (d, *J* = 7.2 Hz, 1H), 4.26 – 3.77 (m, 2H), 3.03 – 2.32 (m, 2H), 2.32 – 1.76 (m, 2H). <sup>13</sup>C NMR (126 MHz, DMSO) δ 202.8, 173.1, 171.4, 137.8, 129.2, 128.7,

127.1, 55.2, 51.6, 31.0, 23.3. HRMS (ESI-quadrupole)  $m/z$ :  $[M+H]^+$  Calcd. for  $C_{13}H_{15}N_2O_2S$  263.0849; found: 263.0853.

### ***N*-(2,6-Dioxopiperidin-3-yl)-2-(4-hydroxyphenyl)ethanethioamide (3et)**

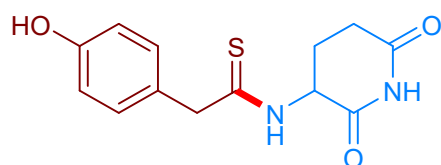

The general procedure B conducted with 4-(1,2,3-thiadiazol-4-yl)phenol (89 mg, 0.5 mmol),  $Cu(OAc)_2$  (9 mg, 0.05 mmol), Xantphos (28 mg, 0.05 mmol) and 3-aminopiperidine-2,6-dione (64 mg, 0.5 mmol) in THF (2.5 mL) at 90 °C for 8 h gave *N*-(2,6-dioxopiperidin-3-yl)-2-(4-hydroxyphenyl)-ethanethioamide as pale yellow solid (89 mg, 64%).  $^1H$  NMR (500 MHz, DMSO)  $\delta$  10.96 (d,  $J$  = 18.5 Hz, 1H), 10.34 (d,  $J$  = 10.2 Hz, 1H), 9.75 – 8.51 (m, 1H), 7.12 (dd,  $J$  = 11.6, 6.7 Hz, 2H), 6.92 – 6.50 (m, 2H), 5.35 (s, 1H), 3.83 (dd,  $J$  = 12.1, 6.6 Hz, 2H), 2.62 (d,  $J$  = 102.4 Hz, 2H), 2.00 (d,  $J$  = 83.1 Hz, 2H).  $^{13}C$  NMR (126 MHz, DMSO)  $\delta$  203.5, 173.1, 171.4, 156.6, 130.2, 127.9, 115.4, 55.2, 50.9, 31.0, 23.3. Spectroscopic data match those previously reported in the literature.<sup>[19]</sup>

### ***N*-Propyl-2-(thiophen-2-yl)ethanethioamide (3eu)**

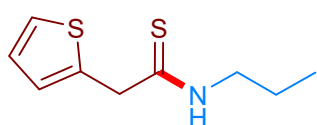

The general procedure B conducted with 4-(thiophen-2-yl)-1,2,3-thiadiazole (672 mg, 4 mmol),  $Cu(OAc)_2$  (72 mg, 0.4 mmol), Xantphos (224 mg, 0.4 mmol) and propan-1-amine (236 mg, 4 mmol) in THF (20 mL) at 90 °C for 8 h gave *N*-propyl-2-(thiophen-2-yl)ethanethioamide as yellow oil (700 mg, 88%).  $^1H$  NMR (500 MHz,  $CDCl_3$ )  $\delta$  7.40 (s, 1H), 7.30 (d,  $J$  = 5.2 Hz, 1H), 7.03 (dd,  $J$  = 4.8, 3.7 Hz, 1H), 6.97 (d,  $J$  = 2.9 Hz, 1H), 4.32 (s, 2H), 3.59 (dd,  $J$  = 13.0, 6.8 Hz, 2H), 1.91 – 1.38 (m, 2H), 0.88 (t,  $J$  = 7.4 Hz, 3H).  $^{13}C$  NMR (126 MHz,  $CDCl_3$ )  $\delta$  200.2, 136.1, 128.1, 127.6, 126.4, 47.8, 46.7, 21.1, 11.3. HRMS (ESI-quadrupole)  $m/z$ :  $[M+H]^+$  Calcd. for  $C_9H_{14}NS_2$  200.0562; found: 200.0560.

### ***N*-(2-(Thiophen-2-yl)ethyl)propan-1-amine (3ev)**

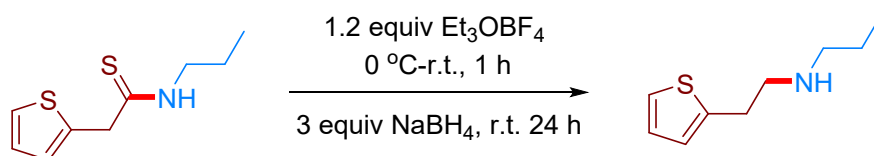

The general procedure conducted as reported<sup>[18]</sup>. <sup>1</sup>H NMR (500 MHz, CDCl<sub>3</sub>) δ 7.14 (d, *J* = 5.2 Hz, 1H), 7.02 – 6.89 (m, 1H), 6.84 (d, *J* = 3.0 Hz, 1H), 3.03 (t, *J* = 6.9 Hz, 2H), 2.91 (t, *J* = 7.0 Hz, 2H), 2.60 (t, *J* = 7.3 Hz, 2H), 1.50 (m, 2H), 0.90 (t, *J* = 7.4 Hz, 3H). <sup>13</sup>C NMR (126 MHz, CDCl<sub>3</sub>) δ 142.6, 126.9, 125.0, 123.5, 51.6, 51.1, 30.4, 23.1, 11.8. HRMS (ESI-quadrupole) *m/z*: [M+H]<sup>+</sup> Calcd. for C<sub>9</sub>H<sub>16</sub>NS 170.0998; found: 170.0996.

**1-(4-((4-(tert-butyl)phenyl)sulfonyl)piperazin-1-yl)-2-(pyridin-2-yl)ethane-1-thione (3ew)**

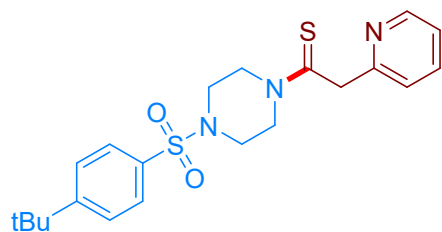

The general procedure C conducted with 4-(pyridin-2-yl)-1,2,3-thiadiazole (82 mg, 0.5 mmol), Cu(OAc)<sub>2</sub> (9 mg, 0.05 mmol), Xantphos (28 mg, 0.05 mmol) and 1-((4-(tert-butyl)phenyl)sulfonyl)piperazine (141 mg, 0.5 mmol) in 1,4-dioxane (2.5 mL) at 90 °C for 8 h gave 1-(4-((4-(tert-butyl)phenyl)sulfonyl)piperazin-1-yl)-2-(pyridin-2-yl)ethane-1-thione as yellow solid (153 mg, 73%). <sup>1</sup>H NMR (500 MHz, CDCl<sub>3</sub>) δ 8.37 (d, *J* = 4.2 Hz, 1H), 7.62 (d, *J* = 8.5 Hz, 2H), 7.57 – 7.50 (m, 3H), 7.42 (d, *J* = 7.8 Hz, 1H), 7.12 (dd, *J* = 6.7, 5.1 Hz, 1H), 4.71 – 4.29 (m, 4H), 4.15 – 3.84 (m, 2H), 3.24 – 3.01 (m, 2H), 2.97 – 2.79 (m, 2H), 1.36 (s, 9H). <sup>13</sup>C NMR (126 MHz, CDCl<sub>3</sub>) δ 199.5, 157.1, 156.1, 149.2, 136.8, 132.0, 127.6, 126.2, 123.4, 122.2, 53.1, 50.0, 49.0, 45.9, 45.3, 35.2, 31.1. HRMS (ESI-quadrupole) *m/z*: [M+H]<sup>+</sup> Calcd. for C<sub>21</sub>H<sub>28</sub>N<sub>3</sub>O<sub>2</sub>S<sub>2</sub> 418.1617; found: 418.1618.

**1-(4-((4-(tert-butyl)phenyl)sulfonyl)piperazin-1-yl)-2-(6-methoxypyridin-3-yl)ethane-1-thione (3ex)**

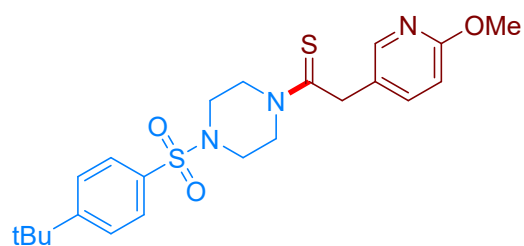

The general procedure C conducted with 4-(6-methoxypyridin-2-yl)-1,2,3-thiadiazole (97 mg, 0.5 mmol), Cu(OAc)<sub>2</sub> (9 mg, 0.05 mmol), Xantphos (28 mg, 0.05 mmol) and

1-((4-(tert-butyl)phenyl)sulfonyl)-piperazine (141 mg, 0.5 mmol) in 1,4-dioxane (2.5 mL) at 90 °C for 8 h gave 1-(4-((4-(tert-butyl)phenyl)sulfinyl)piperazin-1-yl)-2-(6-methoxypyridin-3-yl)ethane-1-thione as white solid (169 mg, 76%). <sup>1</sup>H NMR (500 MHz, CDCl<sub>3</sub>) δ 7.95 (s, 1H), 7.59 (d, *J* = 8.3 Hz, 2H), 7.54 (d, *J* = 8.3 Hz, 3H), 6.59 (d, *J* = 8.5 Hz, 1H), 4.41 (s, 2H), 4.15 (s, 2H), 3.91 (s, 3H), 3.77 (s, 2H), 3.08 (d, *J* = 4.4 Hz, 2H), 2.83 (s, 2H), 1.36 (s, 9H). <sup>13</sup>C NMR (126 MHz, CDCl<sub>3</sub>) δ 200.4, 163.4, 157.3, 145.9, 138.4, 131.9, 127.6, 126.3, 123.9, 111.1, 53.4, 49.3, 49.0, 46.7, 45.8, 45.3, 35.2, 31.0. HRMS (ESI-quadrupole) *m/z*: [M+H]<sup>+</sup> Calcd. for C<sub>22</sub>H<sub>30</sub>N<sub>3</sub>O<sub>3</sub>S<sub>2</sub> 448.1723; found: 448.1724.

**2-(5-bromopyridin-3-yl)-1-(4-((4-(tert-butyl)phenyl)sulfinyl)piperazin-1-yl)ethane-1-thione (3ey)**

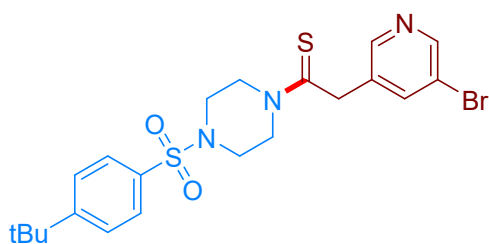

The general procedure C conducted with 4-(5-bromopyridin-3-yl)-1,2,3-thiadiazole (121 mg, 0.5 mmol), Cu(OAc)<sub>2</sub> (9 mg, 0.05 mmol), Xantphos (28 mg, 0.05 mmol) and 1-((4-(tert-butyl)phenyl)sulfonyl)-piperazine (141 mg, 0.5 mmol) in 1,4-dioxane (2.5 mL) at 90 °C for 8 h gave 2-(5-bromopyridin-3-yl)-1-(4-((4-(tert-butyl)phenyl)-sulfinyl)piperazin-1-yl)ethane-1-thione as yellow solid (191 mg, 77%). <sup>1</sup>H NMR (500 MHz, CDCl<sub>3</sub>) δ 8.54 (d, *J* = 1.6 Hz, 1H), 8.36 (s, 1H), 7.79 (s, 1H), 7.62 (d, *J* = 8.5 Hz, 2H), 7.55 (d, *J* = 8.5 Hz, 2H), 4.61 – 4.34 (m, 2H), 4.19 (s, 2H), 3.95 – 3.60 (m, 2H), 3.32 – 3.06 (m, 2H), 3.04 – 2.87 (m, 2H), 1.36 (s, 9H). <sup>13</sup>C NMR (126 MHz, CDCl<sub>3</sub>) δ 198.7, 157.4, 149.8, 147.6, 138.3, 133.2, 132.0, 127.6, 126.4, 120.9, 49.4, 49.0, 46.5, 45.8, 45.3, 35.3, 31.1. HRMS (ESI-quadrupole) *m/z*: [M+H]<sup>+</sup> Calcd. for C<sub>21</sub>H<sub>27</sub>N<sub>3</sub>O<sub>2</sub>S<sub>2</sub>Br 496.0723; found: 496.0722.

**1-(4-((4-(tert-butyl)phenyl)sulfonyl)piperazin-1-yl)-2-(pyridin-4-yl)ethane-1-thione (3ez)**

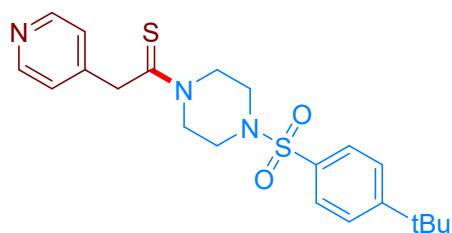

The general procedure C conducted with 4-(pyridin-4-yl)-1,2,3-thiadiazole (82 mg, 0.5 mmol), Cu(OAc)<sub>2</sub> (9 mg, 0.05 mmol), Xantphos (28 mg, 0.05 mmol) and 1-((4-(tert-

butyl)phenyl)sulfonyl)piperazine (141 mg, 0.5 mmol) in 1,4-dioxane (2.5 mL) at 90 °C for 8 h gave 1-(4-((4-(tert-butyl)phenyl)sulfonyl)piperazin-1-yl)-2-(pyridin-4-yl)ethane-1-thione as yellow solid (172 mg, 82%). <sup>1</sup>H NMR (500 MHz, CDCl<sub>3</sub>) δ 8.44 (d, *J* = 5.5 Hz, 2H), 7.57 (q, *J* = 8.6 Hz, 4H), 7.15 (d, *J* = 5.5 Hz, 2H), 4.58 – 4.33 (m, 2H), 4.25 (s, 2H), 3.88 – 3.56 (m, 2H), 3.14 – 2.97 (m, 2H), 2.90 – 2.67 (m, 2H), 1.36 (s, 9H). <sup>13</sup>C NMR (126 MHz, CDCl<sub>3</sub>) δ 198.5, 157.3, 150.2, 144.6, 131.8, 127.5, 126.4, 123.1, 49.6, 49.5, 48.8, 45.6, 45.2, 35.2, 31.0. HRMS (ESI-quadrupole) *m/z*: [M+H]<sup>+</sup> Calcd. for C<sub>21</sub>H<sub>28</sub>N<sub>3</sub>O<sub>2</sub>S<sub>2</sub> 418.1617; found: 418.1617.

**1-(4-((4-(tert-butyl)phenyl)sulfonyl)piperazin-1-yl)-2-(3-methylpyrazin-2-yl)ethane-1-thione (3eza)**

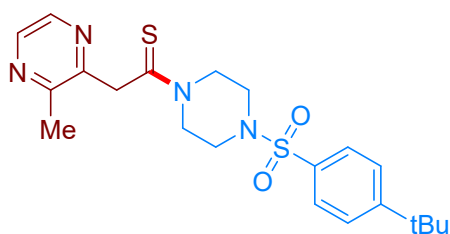

The general procedure C conducted with 4-(3-methylpyrazin-2-yl)-1,2,3-thiadiazole (89 mg, 0.5 mmol), Cu(OAc)<sub>2</sub> (9 mg, 0.05 mmol), Xantphos (28 mg, 0.05 mmol) and 1-((4-(tert-butyl)phenyl)sulfonyl)piperazine (141 mg, 0.5 mmol) in 1,4-dioxane (2.5 mL) at 90 °C for 8 h gave 1-(4-((4-(tert-butyl)phenyl)sulfonyl)piperazin-1-yl)-2-(3-methylpyrazin-2-yl)ethane-1-thione as brown solid (172 mg, 80%). <sup>1</sup>H NMR (500 MHz, CDCl<sub>3</sub>) δ 8.31 (s, 1H), 8.09 (s, 1H), 7.67 (d, *J* = 8.4 Hz, 2H), 7.57 (d, *J* = 8.4 Hz, 2H), 4.49 (s, 2H), 4.38 (s, 2H), 4.07 – 3.83 (m, 2H), 3.27 – 3.14 (m, 2H), 3.14 – 3.02 (m, 2H), 2.60 (s, 3H), 1.38 (s, 9H). <sup>13</sup>C NMR (126 MHz, CDCl<sub>3</sub>) δ 198.0, 157.3, 153.4, 150.8, 142.3, 141.1, 132.0, 127.7, 126.3, 50.0, 48.8, 48.6, 46.0, 45.4, 35.3, 31.1, 22.0. HRMS (ESI-quadrupole) *m/z*: [M+H]<sup>+</sup> Calcd. for C<sub>21</sub>H<sub>29</sub>N<sub>4</sub>O<sub>2</sub>S<sub>2</sub> 433.1726; found: 433.1722.

**1-(4-((4-(tert-butyl)phenyl)sulfonyl)piperazin-1-yl)-2-(1H-pyrrolo[2,3-*b*]pyridin-3-yl)ethane-1-thione (3ezb)**

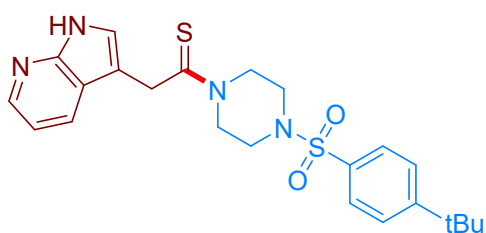

The general procedure C conducted with 4-(1H-pyrrolo[2,3-*b*]pyridin-3-yl)-1,2,3-thiadiazole (101 mg, 0.5 mmol), Cu(OAc)<sub>2</sub> (9 mg, 0.05 mmol), Xantphos (28 mg, 0.05 mmol) and 1-((4-(tert-butyl)phenyl)sulfonyl) -

piperazine (141 mg, 0.5 mmol) in 1,4-dioxane (2.5 mL) at 90 °C for 8 h gave 1-(4-((4-(tert-butyl)phenyl)sulfonyl)piperazin-1-yl)-2-(1*H*-pyrrolo[2,3-*b*]pyridin-3-yl)ethane-1-thione as yellow solid (164 mg, 72%). <sup>1</sup>H NMR (500 MHz, DMSO) δ 11.50 (s, 1H), 8.17 (d, *J* = 4.0 Hz, 1H), 8.09 (d, *J* = 7.7 Hz, 1H), 7.79 – 7.51 (m, 4H), 7.30 (s, 1H), 6.97 (dd, *J* = 7.8, 4.7 Hz, 1H), 4.33 (s, 4H), 3.91 (s, 2H), 2.98 (d, *J* = 4.7 Hz, 2H), 2.82 (s, 2H), 1.32 (s, 9H). <sup>13</sup>C NMR (126 MHz, DMSO) δ 200.7, 157.0, 148.9, 143.1, 132.3, 127.9, 127.8, 126.8, 124.3, 119.4, 115.4, 108.0, 60.2, 49.3, 48.9, 46.2, 45.8, 35.4, 31.2. HRMS (ESI-quadrupole) *m/z*: [M+H]<sup>+</sup> Calcd. for C<sub>23</sub>H<sub>29</sub>N<sub>4</sub>O<sub>2</sub>S<sub>2</sub> 457.1726; found: 457.1722.

## VII. Mechanism Studies

### 1. Synthesis of 5-*D*-4-phenyl-1,2,3-thiadiazole

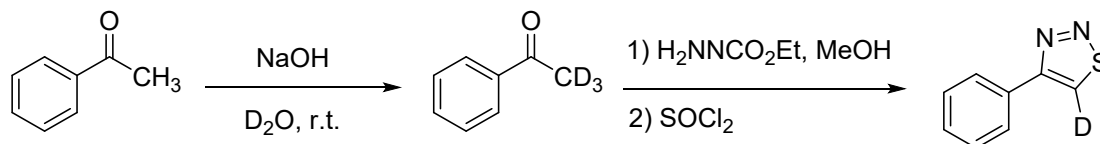

**5-*D*-4-phenyl-1,2,3-thiadiazole** Dissolving NaOH (10 mmol, 400 mg) in D<sub>2</sub>O (8 mL), acetophenone (1.45 g, 12 mmol) was added dropwise to the above mixture at room temperature. After stirring for 8 h, the mixture was extracted with diethyl ether (50 mL x 2). The organic layer was dried with MgSO<sub>4</sub>, and concentrated in *vacuo* to give the product as yellow oil (1.14 g, 77%). The general procedure C conducted with acetophenone-*d*<sub>3</sub> (1 g, 8.1 mmol), ethyl hydrazinecarboxylate (1.04 g, 10 mmol), one drop of concentrated hydrochloric acid gave hydrazone as white solid. Dissolving hydrazone intermediate (1.05 g, 5 mmol) in excess SOCl<sub>2</sub> (10 mL) at 0 °C, stirred at r.t. for 8 h to give 5-*D*-4-phenyl-1,2,3-thiadiazole as yellow solid (688 mg, 82%). <sup>1</sup>H NMR (400 MHz, CDCl<sub>3</sub>) δ 8.05 (d, *J* = 7.2 Hz, 2H), 7.51 (t, *J* = 7.3 Hz, 2H), 7.45 (t, *J* = 7.2 Hz, 1H). <sup>13</sup>C NMR (101 MHz, CDCl<sub>3</sub>) δ 162.8, 130.8, 130.1 (m), 129.5, 129.2, 127.4. HRMS (ESI-quadrupole) *m/z*: [M+H]<sup>+</sup> Calcd. for C<sub>8</sub>H<sub>6</sub>DN<sub>2</sub>S 164.0387; found: 164.0384.

### 2. Thiadiazole ring-opening experiment

#### A: thiadiazole ring-opening experiment

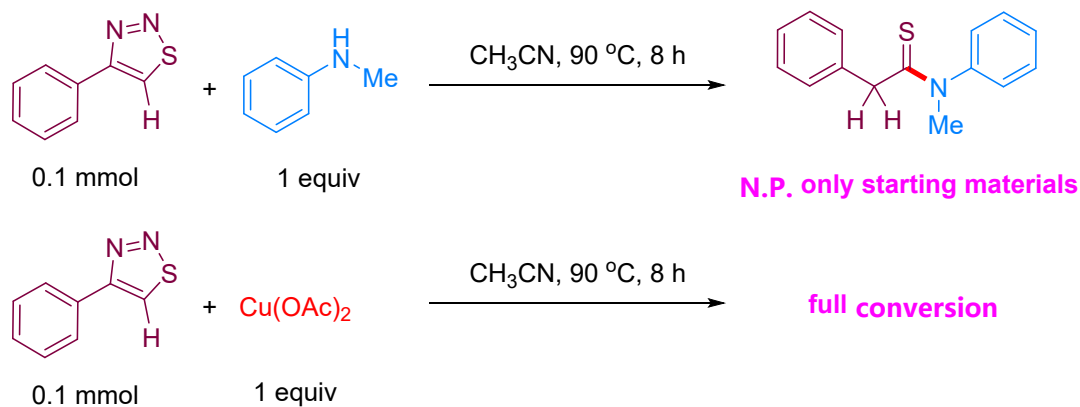

Under N<sub>2</sub> atmosphere, 5-*H*-4-phenyl-1,2,3-thiadiazole (16.2 mg, 0.1 mmol) with 1 equivalent amount of *N*-methylaniline (11 mg, 0.1 mmol) (experiment A-1) or with

Cu(OAc)<sub>2</sub> (18 mg, 0.1 mmol) (experiment A-2) were introduced in a Schlenk tube followed with 0.5 mL CH<sub>3</sub>CN. Then, the Schlenk tube was closed and the resulting mixture was stirred at 90 °C (oil bath temperature) for 8 h. After the reaction, dodecane was added as internal standard for GC-testing. GC and TLC both indicated that 5-*H*-4-phenyl-1,2,3-thiadiazole didn't react with *N*-methylaniline, only starting material left. However, Cu(OAc)<sub>2</sub> can react with 5-*H*-4-phenyl-1,2,3-thiadiazole with almost full conversion.

### 3. D-labelling experiment

#### A: D-labeling experiment

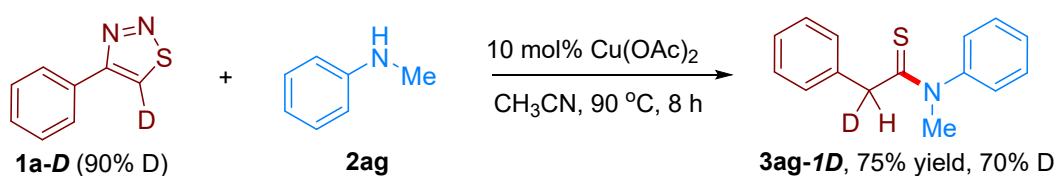

The general procedure D conducted with 5-*D*-4-phenyl-1,2,3-thiadiazole (82 mg, 0.5 mmol), Cu(OAc)<sub>2</sub> (9 mg, 0.05 mmol) and *N*-methylaniline (54 mg, 0.5 mmol) in CH<sub>3</sub>CN (2.5 mL) at 90 °C for 8 h gave *N*-methyl-*N*,2-diphenylethanethioamide-2-*d* compound as yellow oil (91 mg, 75%). <sup>1</sup>H NMR (500 MHz, CDCl<sub>3</sub>) δ 7.49 – 7.27 (m, 3H), 7.19 – 7.07 (m, 3H), 7.05 – 6.87 (m, 4H), 4.02 (s, 1H), 3.72 (s, 3H). <sup>13</sup>C NMR (126 MHz, CDCl<sub>3</sub>) δ 202.8, 145.4, 136.8, 129.7, 128.7, 128.5, 128.2, 126.7, 126.0, 50.8, 46.3. HRMS (ESI-quadrupole) *m/z*: [M+H]<sup>+</sup> Calcd. for C<sub>15</sub>H<sub>15</sub>DN<sub>2</sub>S 243.1061; found: 243.1058.



## 4. KIE experiments

### B: KIE experiment

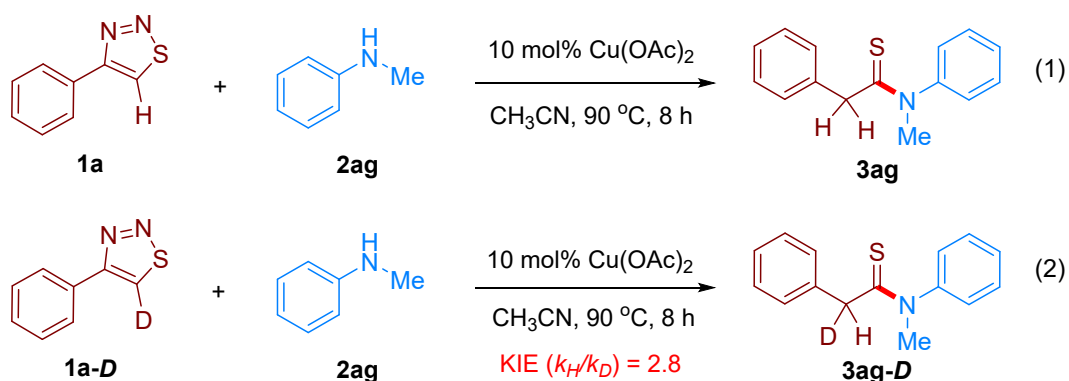

The initial rate of the reaction was determined by measurement experiment yields after 2 minutes, 4 minutes, 6 minutes, 8 minutes, 10 minutes, 12 minutes, 14 minutes, 16 minutes, 18 minutes, 20 minutes, 24 minutes, 26 minutes respectively by GC: To a dried 15 mL Schleck tube, 5-(H/D)-4-phenyl-1,2,3-thiadiazole (0.5 mmol, 81 mg), PhNHMe (0.5 mmol, 54 mg), Cu(OAc)<sub>2</sub> (0.05 mmol, 9 mg) were dissolved in dry CH<sub>3</sub>CN (5 mL) under N<sub>2</sub> atmosphere. n-dodecane (17 mg) was used as internal standard. The sealed tube was subsequently immersed in a preheated oil bath at 90 °C. Every two minutes, microinjector was used to take 20 μL samples for GC testing. During this period of time, the colour of reaction solution changed from blue to green, yellow and finally brown. The results were shown in below.

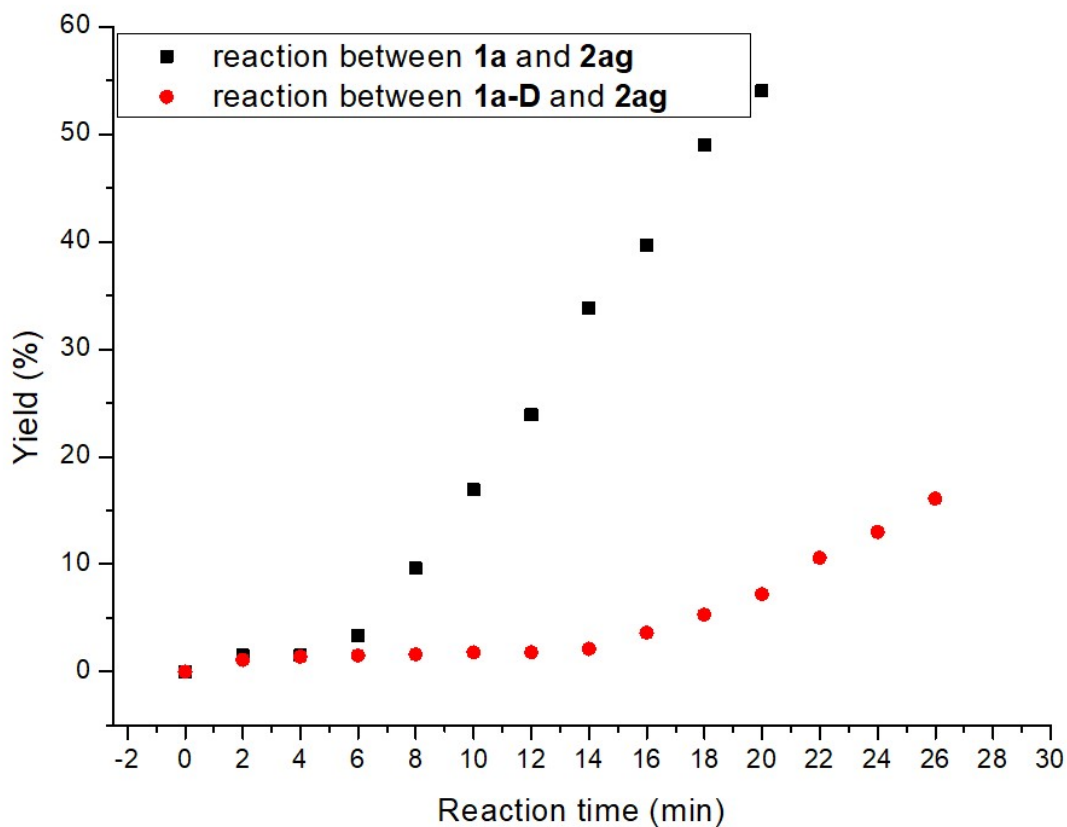

From the figure we can see that there is an obvious induction period of approximately 6 min in the reaction procedure. After 6 min, the reaction goes as first order reaction. Select the 8, 10, 12, 14, 16 min to calculate the initial rate. For 5-D-4-phenyl-1,2,3-thiadiazole, the results were obtained with the same procedure as above with 5-H-4-phenyl-1,2,3-thiadiazole. From the figure we can see that there is an obvious induction period of approximately 14 min in the reaction procedure. After 14 min, the reaction goes as first order reaction. Select the 18, 20, 22, 24, 26 min to calculate the initial rate.

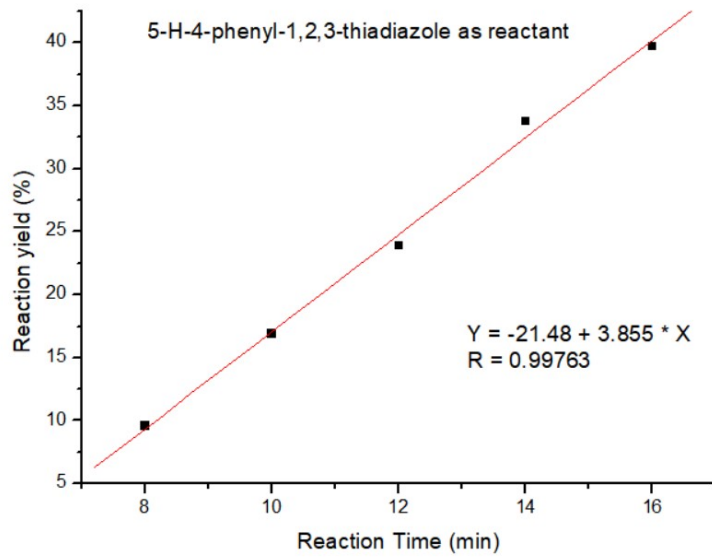

Linear Regression for Data1\_B:

$$Y = A + B * X$$

| Parameter | Value  | Error   |
|-----------|--------|---------|
| -----     |        |         |
| A         | -21.48 | 1.89232 |
| B         | 3.855  | 0.15349 |
| -----     |        |         |

| R       | SD      | N | P          |
|---------|---------|---|------------|
| -----   |         |   |            |
| 0.99763 | 0.97074 | 5 | 1.38402E-4 |
| -----   |         |   |            |

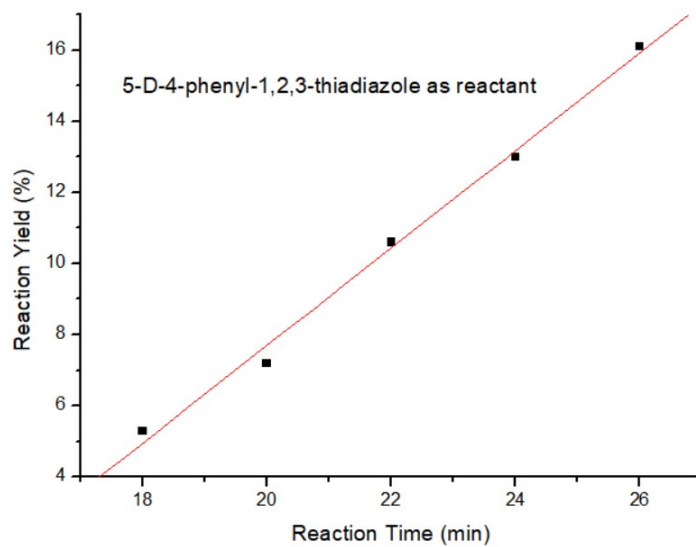

Linear Regression for Data1\_B:

$$Y = A + B * X$$

| Parameter | Value | Error   |
|-----------|-------|---------|
| A         | -19.7 | 1.36733 |
| B         | 1.37  | 0.06164 |

  

| R       | SD      | N | P          |
|---------|---------|---|------------|
| 0.99698 | 0.38987 | 5 | 1.99447E-4 |

So, the KIE of  $K(H/D) = 3.855/1.37 = 2.8$ .

## 5. Intermediate identification

### C: Identification of active-catalyst species

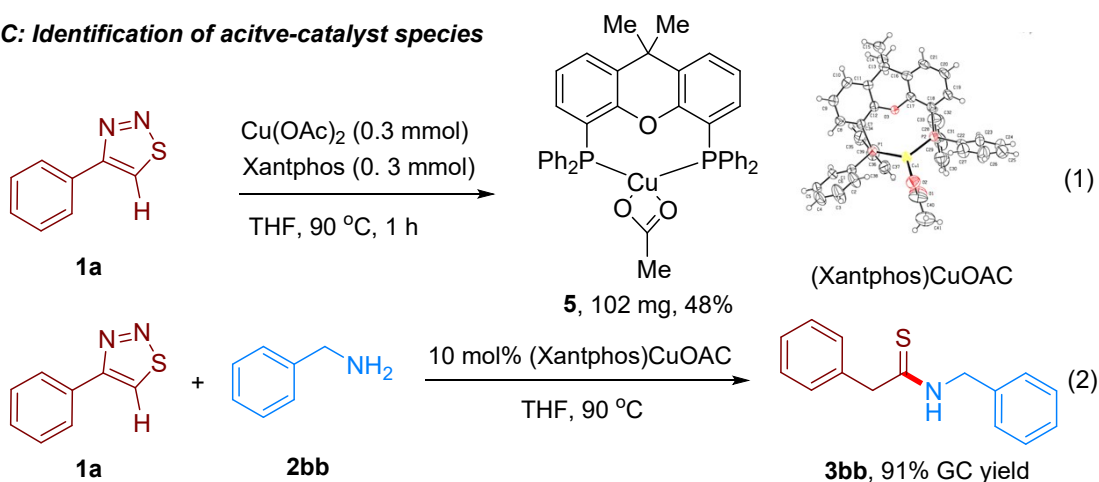

Under  $N_2$  atmosphere, 5-*H*-4-phenyl-1,2,3-thiadiazole (48.6 mg, 0.3 mmol) with 1 equivalent amount of  $Cu(OAc)_2$  (54 mg, 0.3 mmol) and Xantphos (173 mg, 0.3 mmol) were introduced in a Schlenk tube followed with 1 mL THF. Then, the Schlenk tube was closed and the resulting mixture was stirred at 90 °C (oil bath temperature) for 1 h. After the reaction, the mixture was taken into the glovebox again, then filtrated through a short plug of celite. The mixture was dropped into the pentane (10 mL) to produce red solid (102 mg, 48%).  $^1H$  NMR (500 MHz,  $CDCl_3$ )  $\delta$  7.51 (d,  $J = 7.6$  Hz, 2H), 7.37 (s, 7H), 7.32 – 7.16 (m, 15H), 7.14 – 7.00 (m, 2H), 6.58 (s, 2H), 2.01 (s, 3H), 1.65 (s, 6H).

**k\_0m\_sq****Table S6 Crystal data and structure refinement for k\_0m\_sq.**

|                                             |                                                                 |
|---------------------------------------------|-----------------------------------------------------------------|
| Identification code                         | k_0m_sq                                                         |
| Empirical formula                           | C <sub>41</sub> H <sub>35</sub> CuO <sub>3</sub> P <sub>2</sub> |
| Formula weight                              | 701.17                                                          |
| Temperature/K                               | 170.0                                                           |
| Crystal system                              | monoclinic                                                      |
| Space group                                 | P2 <sub>1</sub> /c                                              |
| a/Å                                         | 10.0488(11)                                                     |
| b/Å                                         | 19.0703(19)                                                     |
| c/Å                                         | 20.399(3)                                                       |
| α/°                                         | 90                                                              |
| β/°                                         | 93.731(4)                                                       |
| γ/°                                         | 90                                                              |
| Volume/Å <sup>3</sup>                       | 3900.8(8)                                                       |
| Z                                           | 4                                                               |
| ρ <sub>calc</sub> /cm <sup>3</sup>          | 1.194                                                           |
| μ/mm <sup>-1</sup>                          | 0.676                                                           |
| F(000)                                      | 1456.0                                                          |
| Crystal size/mm <sup>3</sup>                | 0.15 × 0.05 × 0.03                                              |
| Radiation                                   | MoKα (λ = 0.71073)                                              |
| 2θ range for data collection/               | 4.002 to 50.052                                                 |
| Index ranges                                | -11 ≤ h ≤ 11, -21 ≤ k ≤ 22, -24 ≤ l ≤ 19                        |
| Reflections collected                       | 24115                                                           |
| Independent reflections                     | 6766 [R <sub>int</sub> = 0.1124, R <sub>sigma</sub> = 0.1108]   |
| Data/restraints/parameters                  | 6766/0/427                                                      |
| Goodness-of-fit on F <sup>2</sup>           | 1.036                                                           |
| Final R indexes [I ≥ 2σ (I)]                | R <sub>1</sub> = 0.0829, wR <sub>2</sub> = 0.2054               |
| Final R indexes [all data]                  | R <sub>1</sub> = 0.1653, wR <sub>2</sub> = 0.2571               |
| Largest diff. peak/hole / e Å <sup>-3</sup> | 1.32/-0.78                                                      |

**Table S7 Fractional Atomic Coordinates (×10<sup>4</sup>) and Equivalent Isotropic Displacement Parameters (Å<sup>2</sup>×10<sup>3</sup>) for k\_0m\_sq. U<sub>eq</sub> is defined as 1/3 of of the trace of the orthogonalised U<sub>ij</sub> tensor.**

| Atom | x               | y         | z               | U(eq)   |
|------|-----------------|-----------|-----------------|---------|
| Cu1  | 7506.7(9)       | 3550.6(4) | 1736.5(5)       | 50.7(3) |
| P1   | 6574.1(1)<br>7) | 2557.9(9) | 2038.7(9)       | 34.3(5) |
| P2   | 6583.2(1)<br>7) | 4573.3(9) | 1978.5(1)<br>0) | 37.6(5) |
| O3   | 5669(4)         | 3583(2)   | 2937(2)         | 33.2(1) |

|     |         |         |         |          |
|-----|---------|---------|---------|----------|
|     |         |         |         | 0)       |
| O2  | 9243(6) | 3558(3) | 1253(3) | 69.8(16) |
| O1  | 7463(6) | 3609(4) | 554(3)  | 82(2)    |
| C39 | 4837(6) | 2514(3) | 1713(4) | 37.5(17) |
| C17 | 6031(6) | 4201(3) | 3258(3) | 35.5(16) |
| C18 | 6446(6) | 4747(3) | 2851(4) | 38.1(17) |
| C1  | 7322(7) | 1744(4) | 1778(4) | 40.5(17) |
| C12 | 6039(6) | 2981(3) | 3285(3) | 36.4(16) |
| C7  | 6443(6) | 2422(3) | 2923(3) | 35.8(16) |
| C28 | 4894(7) | 4640(4) | 1604(4) | 41.8(18) |
| C8  | 6793(7) | 1804(4) | 3255(4) | 43.4(18) |
| C16 | 6015(6) | 4256(4) | 3930(4) | 41.7(17) |
| C6  | 6650(7) | 1121(4) | 1683(3) | 43.1(18) |
| C19 | 6807(7) | 5370(4) | 3164(4) | 44.8(19) |
| C21 | 6442(7) | 4885(4) | 4211(4) | 49(2)    |
| C34 | 3826(7) | 2261(4) | 2082(4) | 52(2)    |
| C13 | 5529(7) | 3626(4) | 4305(4) | 44.9(18) |
| C10 | 6361(7) | 2341(4) | 4282(4) | 48.6(19) |
| C22 | 7387(7) | 5376(3) | 1703(3) | 40.9(18) |
| C37 | 4526(7) | 2776(4) | 1093(4) | 48.1(19) |
| C11 | 5997(7) | 2969(4) | 3968(4) | 42.1(18) |
| C9  | 6741(8) | 1772(4) | 3921(4) | 52(2)    |
| C23 | 6693(8) | 5965(4) | 1504(4) | 55(2)    |
| C5  | 7286(8) | 516(4)  | 1511(4) | 51(2)    |
| C20 | 6801(8) | 5442(4) | 3832(4) | 52(2)    |

|     |          |         |         |        |
|-----|----------|---------|---------|--------|
| C14 | 3990(7)  | 3629(4) | 4246(4) | 52(2)  |
| C29 | 4696(8)  | 4592(4) | 938(4)  | 60(2)  |
| C38 | 3216(8)  | 2774(4) | 836(4)  | 60(2)  |
| C40 | 8703(8)  | 3584(5) | 661(5)  | 74(3)  |
| C33 | 3797(8)  | 4720(5) | 1969(5) | 63(2)  |
| C15 | 5993(9)  | 3642(4) | 5032(4) | 62(2)  |
| C35 | 2521(7)  | 2275(4) | 1811(5) | 63(2)  |
| C36 | 2206(9)  | 2530(5) | 1198(5) | 72(3)  |
| C2  | 8689(7)  | 1750(4) | 1707(5) | 68(3)  |
| C24 | 7355(11) | 6557(4) | 1312(5) | 74(3)  |
| C27 | 8749(8)  | 5376(5) | 1710(5) | 71(3)  |
| C25 | 8724(11) | 6570(5) | 1348(5) | 87(4)  |
| C4  | 8617(10) | 531(4)  | 1435(5) | 80(3)  |
| C30 | 3423(10) | 4644(5) | 625(5)  | 72(3)  |
| C32 | 2522(9)  | 4764(6) | 1657(6) | 83(3)  |
| C31 | 2345(9)  | 4721(5) | 1000(6) | 81(3)  |
| C41 | 9597(10) | 3625(6) | 114(6)  | 103(4) |
| C26 | 9410(10) | 5973(5) | 1543(5) | 88(3)  |
| C3  | 9330(9)  | 1156(5) | 1530(6) | 100(4) |

**Table S8 Anisotropic Displacement Parameters ( $\text{\AA}^2 \times 10^3$ ) for k\_0m\_sq. The Anisotropic displacement factor exponent takes the form:  $-2\pi^2[h^2a^*U_{11}+2hka^*b^*U_{12}+\dots]$ .**

| Atom | $U_{11}$ | $U_{22}$ | $U_{33}$ | $U_{23}$ | $U_{13}$ | $U_{12}$ |
|------|----------|----------|----------|----------|----------|----------|
| Cu1  | 46.9(6)  | 33.8(5)  | 74.1(8)  | 0.0(5)   | 24.8(5)  | 1.3(4)   |
| P1   | 38.2(10) | 29.3(9)  | 35.7(11) | -2.3(8)  | 6.2(8)   | 1.0(8)   |
| P2   | 39.5(10) | 31.1(9)  | 43.3(12) | -1.2(8)  | 11.3(8)  | -0.9(8)  |
| O3   | 44(2)    | 26(2)    | 30(3)    | 0(2)     | 6(2)     | 0(2)     |
| O2   | 63(4)    | 77(4)    | 70(4)    | 2(4)     | 9(3)     | 2(3)     |
| O1   | 62(4)    | 112(6)   | 73(5)    | -17(4)   | 8(3)     | 3(4)     |
| C39  | 35(4)    | 29(3)    | 49(5)    | -5(3)    | 8(3)     | -4(3)    |
| C17  | 32(3)    | 32(4)    | 43(5)    | -7(3)    | 2(3)     | -1(3)    |
| C18  | 33(4)    | 30(4)    | 54(5)    | -2(3)    | 14(3)    | 3(3)     |
| C1   | 44(4)    | 32(4)    | 45(5)    | 0(3)     | 0(3)     | -2(3)    |
| C12  | 38(4)    | 30(4)    | 42(5)    | 2(3)     | 3(3)     | 2(3)     |
| C7   | 35(4)    | 31(4)    | 41(4)    | 1(3)     | 6(3)     | 1(3)     |
| C28  | 41(4)    | 36(4)    | 49(5)    | -3(3)    | 9(4)     | 1(3)     |
| C8   | 51(4)    | 40(4)    | 39(5)    | -1(3)    | 6(3)     | 9(3)     |
| C16  | 39(4)    | 45(4)    | 41(5)    | -7(4)    | 7(3)     | 5(3)     |
| C6   | 56(4)    | 34(4)    | 40(5)    | -6(3)    | 9(4)     | -2(4)    |
| C19  | 48(4)    | 31(4)    | 56(6)    | -8(3)    | 16(4)    | -5(3)    |

|     |        |         |         |        |        |        |
|-----|--------|---------|---------|--------|--------|--------|
| C21 | 62(5)  | 44(4)   | 41(5)   | -17(4) | 1(4)   | 2(4)   |
| C34 | 42(4)  | 52(5)   | 64(6)   | 10(4)  | 16(4)  | 9(4)   |
| C13 | 59(5)  | 42(4)   | 35(4)   | -7(3)  | 10(3)  | -4(4)  |
| C10 | 58(5)  | 49(5)   | 39(5)   | 9(4)   | 3(4)   | 2(4)   |
| C22 | 57(5)  | 36(4)   | 32(4)   | -9(3)  | 19(3)  | 0(4)   |
| C37 | 52(5)  | 53(5)   | 40(5)   | 3(4)   | 10(4)  | 1(4)   |
| C11 | 53(4)  | 41(4)   | 33(5)   | -1(3)  | 8(3)   | 2(4)   |
| C9  | 72(5)  | 39(4)   | 45(5)   | 4(4)   | 6(4)   | 6(4)   |
| C23 | 66(5)  | 32(4)   | 67(6)   | 4(4)   | 15(4)  | 0(4)   |
| C5  | 72(6)  | 29(4)   | 51(5)   | 0(3)   | 5(4)   | -2(4)  |
| C20 | 64(5)  | 36(4)   | 58(6)   | -20(4) | 10(4)  | -5(4)  |
| C14 | 60(5)  | 46(5)   | 54(5)   | -4(4)  | 21(4)  | 1(4)   |
| C29 | 60(5)  | 60(5)   | 60(6)   | -4(4)  | 5(4)   | -8(4)  |
| C38 | 62(5)  | 58(5)   | 59(6)   | 11(4)  | -9(5)  | 7(4)   |
| C40 | 42(5)  | 125(9)  | 52(6)   | -33(6) | -7(4)  | 11(5)  |
| C33 | 50(5)  | 72(6)   | 69(6)   | -1(5)  | 6(4)   | 7(4)   |
| C15 | 95(6)  | 50(5)   | 40(5)   | -9(4)  | 1(4)   | 2(5)   |
| C35 | 35(4)  | 65(6)   | 89(7)   | 14(5)  | 8(4)   | -4(4)  |
| C36 | 55(5)  | 70(6)   | 87(8)   | 10(6)  | -15(5) | 1(5)   |
| C2  | 39(5)  | 46(5)   | 122(9)  | -21(5) | 16(5)  | 2(4)   |
| C24 | 115(8) | 43(5)   | 66(7)   | 10(4)  | 29(6)  | -1(5)  |
| C27 | 45(5)  | 59(5)   | 111(8)  | 3(5)   | 28(5)  | -3(4)  |
| C25 | 97(8)  | 58(6)   | 115(9)  | -8(6)  | 68(7)  | -23(6) |
| C4  | 89(7)  | 44(5)   | 109(9)  | -16(5) | 27(6)  | 17(5)  |
| C30 | 87(7)  | 63(6)   | 63(7)   | 3(5)   | -24(6) | -3(5)  |
| C32 | 56(6)  | 98(8)   | 94(9)   | 3(7)   | -2(6)  | 8(5)   |
| C31 | 54(6)  | 63(6)   | 122(10) | -6(6)  | -13(6) | 11(5)  |
| C41 | 71(7)  | 139(11) | 99(9)   | -17(8) | 18(6)  | 13(7)  |
| C26 | 65(6)  | 71(7)   | 130(10) | 21(6)  | 35(6)  | -4(5)  |
| C3  | 52(5)  | 56(6)   | 194(13) | -25(7) | 35(7)  | 12(5)  |

**Table S9 Bond Lengths for k\_0m\_sq.**

| Atom Atom Length/Å |     |            | Atom Atom Length/Å |     |           |
|--------------------|-----|------------|--------------------|-----|-----------|
| Cu1                | P1  | 2.2174(19) | C16                | C13 | 1.521(10) |
| Cu1                | P2  | 2.2290(19) | C6                 | C5  | 1.375(9)  |
| Cu1                | O2  | 2.059(6)   | C19                | C20 | 1.369(10) |
| Cu1                | O1  | 2.412(7)   | C21                | C20 | 1.376(10) |
| P1                 | C39 | 1.828(7)   | C34                | C35 | 1.389(10) |
| P1                 | C1  | 1.820(7)   | C13                | C11 | 1.518(9)  |
| P1                 | C7  | 1.835(7)   | C13                | C14 | 1.544(10) |



|     |     |           |     |     |           |
|-----|-----|-----------|-----|-----|-----------|
| P2  | C18 | 1.824(7)  | C13 | C15 | 1.526(10) |
| P2  | C28 | 1.820(7)  | C10 | C11 | 1.395(9)  |
| P2  | C22 | 1.836(7)  | C10 | C9  | 1.379(10) |
| O3  | C17 | 1.386(7)  | C22 | C23 | 1.370(10) |
| O3  | C12 | 1.388(7)  | C22 | C27 | 1.368(10) |
| O2  | C40 | 1.292(10) | C37 | C38 | 1.386(10) |
| O1  | C40 | 1.251(9)  | C23 | C24 | 1.380(11) |
| C39 | C34 | 1.389(9)  | C5  | C4  | 1.357(11) |
| C39 | C37 | 1.377(10) | C29 | C30 | 1.395(11) |
| C17 | C18 | 1.412(9)  | C38 | C36 | 1.374(11) |
| C17 | C16 | 1.376(9)  | C40 | C41 | 1.479(13) |
| C18 | C19 | 1.387(9)  | C33 | C32 | 1.395(11) |
| C1  | C6  | 1.374(9)  | C35 | C36 | 1.360(12) |
| C1  | C2  | 1.390(10) | C2  | C3  | 1.364(11) |
| C12 | C7  | 1.373(9)  | C24 | C25 | 1.373(13) |
| C12 | C11 | 1.397(10) | C27 | C26 | 1.373(12) |
| C7  | C8  | 1.394(9)  | C25 | C26 | 1.376(13) |
| C28 | C29 | 1.364(10) | C4  | C3  | 1.397(12) |
| C28 | C33 | 1.378(10) | C30 | C31 | 1.374(13) |
| C8  | C9  | 1.364(10) | C32 | C31 | 1.343(13) |
| C16 | C21 | 1.387(9)  |     |     |           |

**Table S10 Bond Angles for k\_0m\_sq.**

| Atom | Atom | Atom | Angle/°    | Atom | Atom | Atom | Angle/°  |
|------|------|------|------------|------|------|------|----------|
| P1   | Cu1  | P2   | 119.73(7)  | C17  | C16  | C21  | 117.0(7) |
| P1   | Cu1  | O1   | 109.70(17) | C17  | C16  | C13  | 117.8(6) |
| P2   | Cu1  | O1   | 101.54(17) | C21  | C16  | C13  | 125.2(7) |
| O2   | Cu1  | P1   | 121.68(17) | C1   | C6   | C5   | 121.9(7) |
| O2   | Cu1  | P2   | 118.57(17) | C20  | C19  | C18  | 121.7(7) |
| O2   | Cu1  | O1   | 58.8(2)    | C20  | C21  | C16  | 121.4(7) |
| C39  | P1   | Cu1  | 110.4(2)   | C35  | C34  | C39  | 118.9(8) |
| C39  | P1   | C7   | 102.8(3)   | C16  | C13  | C14  | 108.1(6) |
| C1   | P1   | Cu1  | 117.2(2)   | C16  | C13  | C15  | 112.7(6) |
| C1   | P1   | C39  | 104.9(3)   | C11  | C13  | C16  | 107.7(6) |
| C1   | P1   | C7   | 103.0(3)   | C11  | C13  | C14  | 107.8(6) |
| C7   | P1   | Cu1  | 116.9(2)   | C11  | C13  | C15  | 111.9(6) |
| C18  | P2   | Cu1  | 115.7(2)   | C15  | C13  | C14  | 108.5(6) |
| C18  | P2   | C22  | 102.1(3)   | C9   | C10  | C11  | 120.3(7) |
| C28  | P2   | Cu1  | 111.0(2)   | C23  | C22  | P2   | 123.3(6) |
| C28  | P2   | C18  | 105.6(3)   | C27  | C22  | P2   | 117.1(6) |

|     |     |     |          |     |     |     |           |
|-----|-----|-----|----------|-----|-----|-----|-----------|
| C28 | P2  | C22 | 103.3(3) | C27 | C22 | C23 | 119.6(7)  |
| C22 | P2  | Cu1 | 117.6(2) | C39 | C37 | C38 | 120.0(7)  |
| C17 | O3  | C12 | 114.1(5) | C12 | C11 | C13 | 118.0(6)  |
| C40 | O2  | Cu1 | 97.5(5)  | C10 | C11 | C12 | 116.6(6)  |
| C40 | O1  | Cu1 | 82.6(5)  | C10 | C11 | C13 | 125.4(7)  |
| C34 | C39 | P1  | 122.3(6) | C8  | C9  | C10 | 121.8(7)  |
| C37 | C39 | P1  | 118.1(5) | C22 | C23 | C24 | 120.6(8)  |
| C37 | C39 | C34 | 119.5(7) | C4  | C5  | C6  | 119.3(7)  |
| O3  | C17 | C18 | 115.3(6) | C19 | C20 | C21 | 120.1(7)  |
| C16 | C17 | O3  | 121.1(6) | C28 | C29 | C30 | 121.4(8)  |
| C16 | C17 | C18 | 123.6(6) | C36 | C38 | C37 | 121.0(8)  |
| C17 | C18 | P2  | 119.0(5) | O2  | C40 | C41 | 117.9(8)  |
| C19 | C18 | P2  | 124.8(5) | O1  | C40 | O2  | 121.1(8)  |
| C19 | C18 | C17 | 116.1(7) | O1  | C40 | C41 | 120.9(9)  |
| C6  | C1  | P1  | 124.7(5) | C28 | C33 | C32 | 120.3(9)  |
| C6  | C1  | C2  | 118.2(7) | C36 | C35 | C34 | 122.0(8)  |
| C2  | C1  | P1  | 116.9(5) | C35 | C36 | C38 | 118.6(8)  |
| O3  | C12 | C11 | 119.9(6) | C3  | C2  | C1  | 120.5(8)  |
| C7  | C12 | O3  | 116.4(6) | C25 | C24 | C23 | 119.9(9)  |
| C7  | C12 | C11 | 123.6(6) | C22 | C27 | C26 | 119.8(8)  |
| C12 | C7  | P1  | 117.6(5) | C24 | C25 | C26 | 118.8(8)  |
| C12 | C7  | C8  | 117.9(6) | C5  | C4  | C3  | 120.2(8)  |
| C8  | C7  | P1  | 124.4(5) | C31 | C30 | C29 | 119.1(9)  |
| C29 | C28 | P2  | 119.0(6) | C31 | C32 | C33 | 120.6(10) |
| C29 | C28 | C33 | 118.4(7) | C32 | C31 | C30 | 120.3(9)  |
| C33 | C28 | P2  | 122.6(6) | C27 | C26 | C25 | 121.2(9)  |
| C9  | C8  | C7  | 119.8(7) | C2  | C3  | C4  | 119.9(8)  |

**Table S11 Hydrogen Atom Coordinates ( $\text{\AA}\times 10^4$ ) and Isotropic Displacement Parameters ( $\text{\AA}^2\times 10^3$ ) for k\_0m\_sq.**

| Atom | x       | y       | z       | U(eq) |
|------|---------|---------|---------|-------|
| H8   | 7067.85 | 1405.8  | 3019.07 | 52    |
| H6   | 5719.3  | 1107.7  | 1738.36 | 52    |
| H19  | 7064.32 | 5758.08 | 2908.67 | 54    |
| H21  | 6488.09 | 4933.43 | 4675.71 | 59    |
| H34  | 4022.28 | 2081.17 | 2511.57 | 62    |
| H10  | 6345.65 | 2305.78 | 4745.69 | 58    |
| H37  | 5210.55 | 2959.05 | 842.23  | 58    |
| H9   | 6973.47 | 1347.09 | 4142.28 | 62    |
| H23  | 5747.1  | 5966.48 | 1498.75 | 65    |

|      |          |         |         |     |
|------|----------|---------|---------|-----|
| H5   | 6798.62  | 92.18   | 1446.83 | 61  |
| H20  | 7044.51  | 5876.93 | 4032.81 | 63  |
| H14A | 3660.96  | 4050.61 | 4457.76 | 79  |
| H14B | 3655     | 3211.45 | 4461.87 | 79  |
| H14C | 3675.72  | 3627.02 | 3781.04 | 79  |
| H29  | 5439.58  | 4520.49 | 680.92  | 72  |
| H38  | 3012.76  | 2943.23 | 402.94  | 72  |
| H33  | 3909.61  | 4745.35 | 2434.06 | 76  |
| H15A | 6969.74  | 3654.99 | 5077.76 | 93  |
| H15B | 5673.69  | 3221.25 | 5248.68 | 93  |
| H15C | 5634.04  | 4060.09 | 5237.25 | 93  |
| H35  | 1828.33  | 2101.25 | 2061.54 | 75  |
| H36  | 1305.93  | 2540.14 | 1023.56 | 86  |
| H2   | 9179.81  | 2171.4  | 1782.69 | 82  |
| H24  | 6864.03  | 6955.55 | 1154.67 | 88  |
| H27  | 9236.35  | 4963.24 | 1830.97 | 85  |
| H25  | 9189.63  | 6983.29 | 1239.63 | 105 |
| H4   | 9065.37  | 116.29  | 1315.71 | 96  |
| H30  | 3302.77  | 4627.58 | 159.56  | 87  |
| H32  | 1772.38  | 4823.93 | 1912.56 | 100 |
| H31  | 1470.64  | 4744.31 | 794.09  | 97  |
| H41A | 10524.9  | 3655.03 | 292.54  | 154 |
| H41B | 9376.69  | 4042.49 | -151.32 | 154 |
| H41C | 9482.57  | 3205.27 | -160.57 | 154 |
| H26  | 10357.02 | 5974.4  | 1562.94 | 105 |
| H3   | 10260.23 | 1166.38 | 1471.74 | 120 |

**Table S12 Solvent masks information for k\_0m\_sq.**

| Number | X     | Y     | Z     | Volume | Electron count | Content |
|--------|-------|-------|-------|--------|----------------|---------|
| 1      | 0.000 | 0.000 | 0.000 | 334    | 107            |         |
| 2      | 0.000 | 0.500 | 0.500 | 334    | 107            |         |

### Experimental

Single crystals of  $C_{41}H_{35}CuO_3P_2$  [k\_0m\_sq] were [ ]. A suitable crystal was selected and [ ] on a 'D8 VENTURE ' diffractometer. The crystal was kept at 170.0 K during data collection. Using Olex2 [1], the structure was solved with the ShelXT [2] structure solution program using Intrinsic Phasing and refined with the ShelXL [3] refinement package using Least Squares minimisation.

1. Dolomanov, O.V., Bourhis, L.J., Gildea, R.J, Howard, J.A.K. & Puschmann, H. (2009), J. Appl. Cryst. 42, 339-341.
2. Sheldrick, G.M. (2015). Acta Cryst. A71, 3-8.
3. Sheldrick, G.M. (2015). Acta Cryst. C71, 3-8.

### Crystal structure determination of [k\_0m\_sq]

**Crystal Data** for  $C_{41}H_{35}CuO_3P_2$  ( $M = 701.17$  g/mol): monoclinic, space group  $P2_1/c$  (no. 14),  $a = 10.0488(11)$  Å,  $b = 19.0703(19)$  Å,  $c = 20.399(3)$  Å,  $\beta = 93.731(4)$ ,  $V = 3900.8(8)$  Å<sup>3</sup>,  $Z = 4$ ,  $T = 170.0$  K,  $\mu(\text{MoK}\alpha) = 0.676$  mm<sup>-1</sup>,  $D_{\text{calc}} = 1.194$  g/cm<sup>3</sup>, 24115 reflections measured ( $4.002^\circ \leq 2\theta \leq 50.052$ ), 6766 unique ( $R_{\text{int}} = 0.1124$ ,  $R_{\text{sigma}} = 0.1108$ ) which were used in all calculations. The final  $R_1$  was 0.0829 ( $I > 2\sigma(I)$ ) and  $wR_2$  was 0.2571 (all data).

### Refinement model description

Number of restraints - 0, number of constraints - unknown.

Details:

#### 1. Fixed Uiso

At 1.2 times of:

All C(H) groups

At 1.5 times of:

All C(H,H,H) groups

#### 2.a Aromatic/amide H refined with riding coordinates:

C8(H8), C6(H6), C19(H19), C21(H21), C34(H34), C10(H10), C37(H37), C9(H9),  
C23(H23), C5(H5), C20(H20), C29(H29), C38(H38), C33(H33), C35(H35), C36(H36),  
C2(H2), C24(H24), C27(H27), C25(H25), C4(H4), C30(H30), C32(H32), C31(H31),  
C26(H26), C3(H3)

#### 2.b Idealised Me refined as rotating group:

C14(H14A,H14B,H14C), C15(H15A,H15B,H15C), C41(H41A,H41B,H41C)

This report has been created with Olex2, compiled on 2018.05.29 svn.r3508 for OlexSys. Please **let us know** if there are any errors or if you would like to have additional features.

Datablock: k\_0m\_sq

Bond precision: C-C = 0.0117 Å Wavelength=0.71073

Cell: a=10.0488(11) b=19.0703(19) c=20.399(3)

alpha=90 beta=93.731(4) gamma=90

Temperature: 170 K

Calculated Reported

Volume 3900.9(8) 3900.8(8)

Space group P 21/c P 1 21/c 1

Hall group -P 2ybc -P 2ybc

Moiety formula C41 H35 Cu O3 P2 [+  
solvent] C41 H35 Cu O3 P2

Sum formula C41 H35 Cu O3 P2 [+  
solvent] C41 H35 Cu O3 P2

Mr 701.18 701.17

Dx,g cm-3 1.194 1.194

Z 4 4

Mu (mm-1) 0.676 0.676

F000 1456.0 1456.0

F000' 1458.57

h,k,lmax 11,22,24 11,22,24

Nref 6874 6766

Tmin,Tmax 0.960,0.980 0.117,0.149

Tmin' 0.904

Correction method= # Reported T Limits: Tmin=0.117 Tmax=0.149

AbsCorr = MULTI-SCAN

Data completeness= 0.984 Theta(max)= 25.026

R(reflections)= 0.0829( 3343) wR2(reflections)= 0.2571( 6766)

S = 1.036 Npar= 427

Datablock k\_0m\_sq - ellipsoid plot

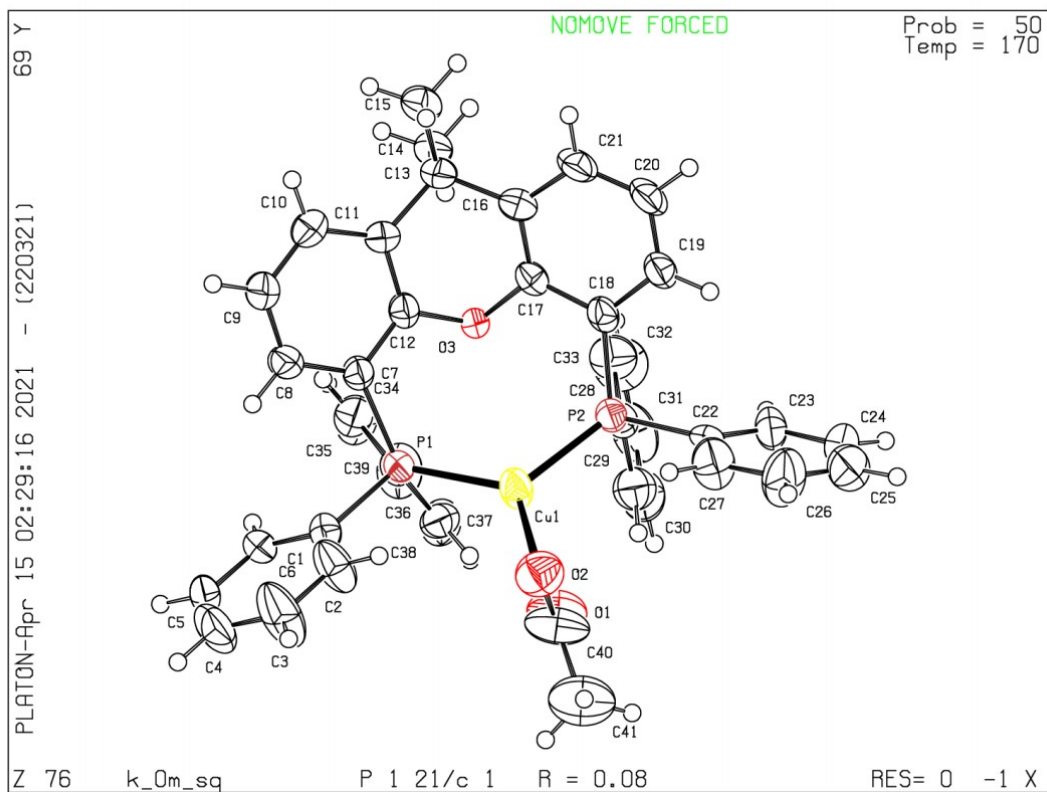

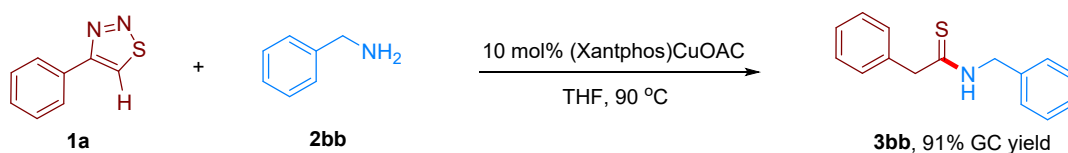

In order to test whether the (Xantphos)Cu(OAc) is the active catalyst species, we conducted the reaction using (Xantphos)Cu(OAc) as catalyst. To a dried 15 mL Schleck tube, 5-H-4-phenyl-1,2,3-thiadiazole (0.1 mmol, 16 mg), PhNHMe (0.1 mmol, 11 mg), (XantPhos)Cu(OAc) (0.01 mmol, 7 mg) were dissolved in dry THF (1 mL) under N<sub>2</sub> atmosphere. n-dodecane (17 mg) was used as internal standard. The sealed tube was subsequently immersed in a preheated oil bath at 90 °C for 8 h. GC tested for the reaction yield (91% GC yield)

## 6. Comparing the initial rate of $\text{Cu}(\text{OAc})_2/\text{Xantphos}$ system and $(\text{Xantphos})\text{Cu}(\text{OAc})$ .

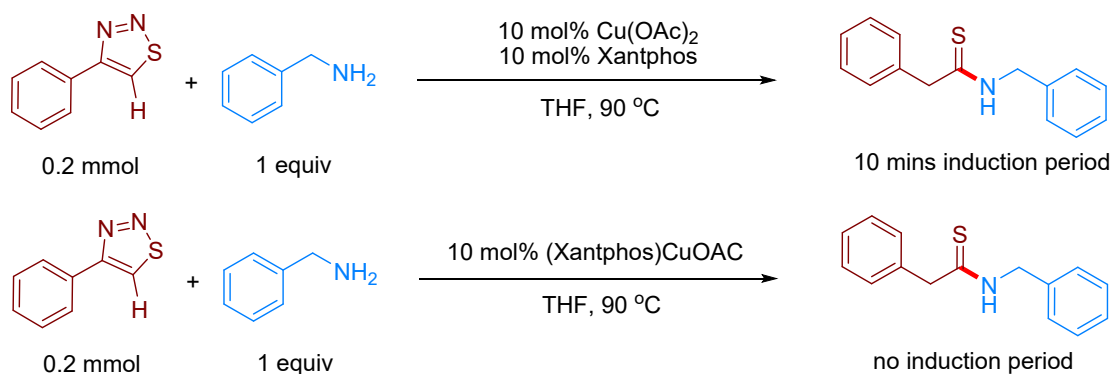

(Reaction A) To a dried 15 mL Schleck tube, 5-H-4-phenyl-1,2,3-thiadiazole (0.2 mmol, 32.4 mg), phenylmethanamine (0.2 mmol, 21.4 mg),  $\text{Cu}(\text{OAc})_2$  (0.02 mmol, 3.6 mg), Xantphos (0.02 mmol, 11.5 mg) were dissolved in dry THF (5 mL) under  $\text{N}_2$  atmosphere. n-dodecane (13 mg) was used as internal standard. The sealed tube was subsequently immersed in a preheated oil bath at 90 °C. Every two minutes, microinjector was used to take 20  $\mu\text{L}$  samples for GC testing. During this period of time, the colour of reaction solution changed from blue to green, yellow and finally brown.

(Reaction B) To a dried 15 mL Schleck tube, 5-H-4-phenyl-1,2,3-thiadiazole (0.2 mmol, 32.4 mg), phenylmethanamine (0.2 mmol, 21.4 mg),  $(\text{Xantphos})\text{Cu}(\text{OAc})$  (0.02 mmol, 14 mg) were dissolved in dry THF (5 mL) under  $\text{N}_2$  atmosphere. n-dodecane (12.5 mg) was used as internal standard. The sealed tube was subsequently immersed in a preheated oil bath at 90 °C. Every two minutes, microinjector was used to take 20  $\mu\text{L}$  samples for GC testing. During this period of time, the colour of reaction solution changed from blue to green, yellow and finally brown. The results were shown in below.

From the figure we can see that there is an obvious induction period of approximately 10 min in the  $\text{Cu}(\text{OAc})_2/\text{Xantphos}$  system. After 10 min, the reaction go as first order reaction. Select the 10, 12, 14, 16, 18 min to calculate the initial rate. For  $(\text{Xantphos})\text{Cu}(\text{OAc})$  catalyst system, there is almost no induction period. The reaction go as first order immediately. Select the 2, 4, 6, 8, 10 min to calculate the initial rate.

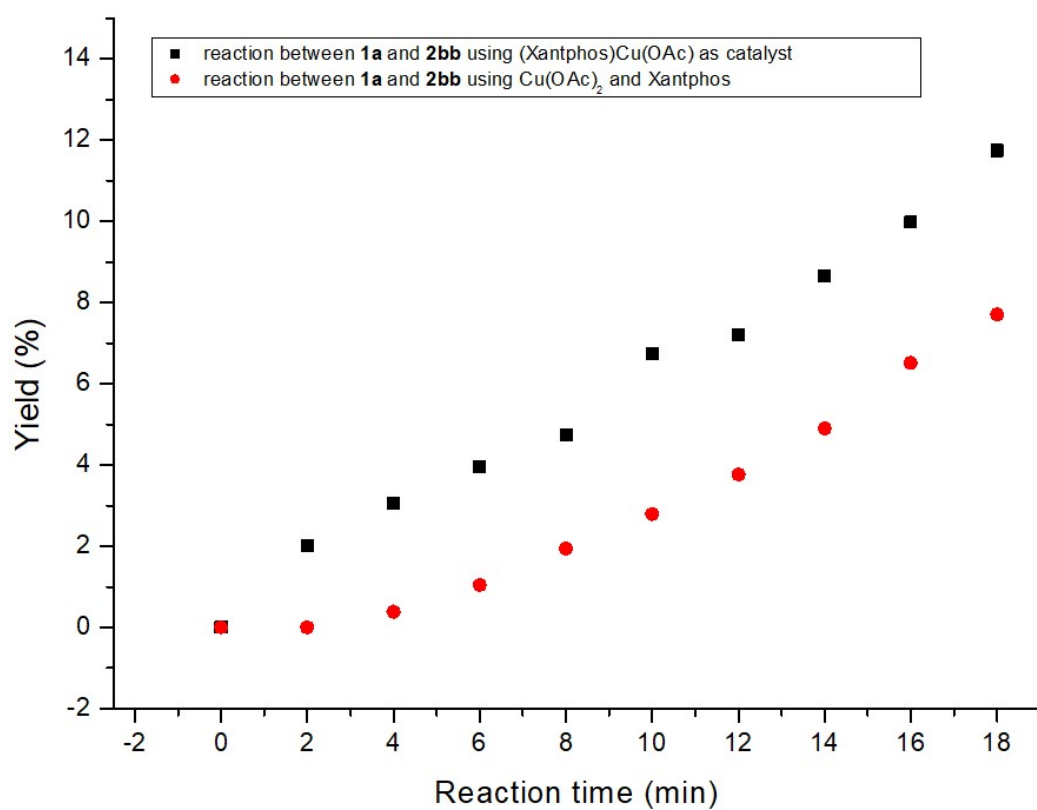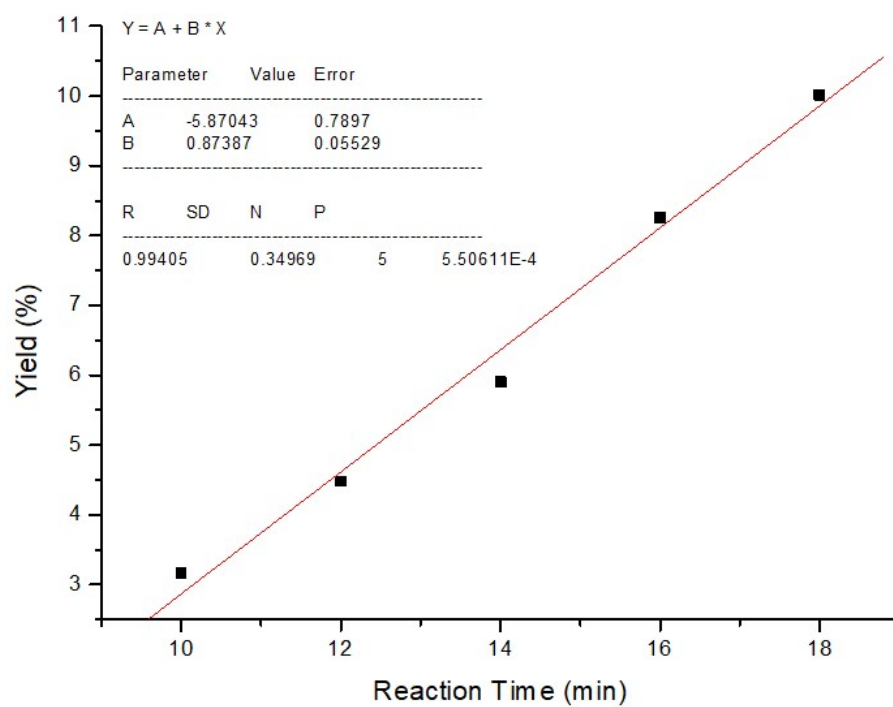



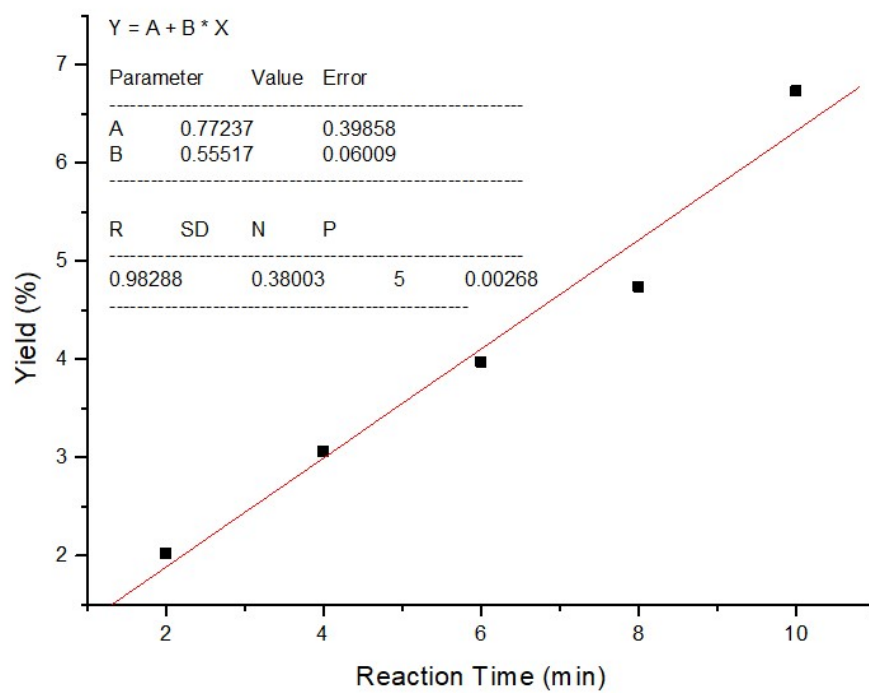

## VIII. NMR Spectra of Compounds

### 4-Phenyl-1,2,3-thiadiazole (1a)

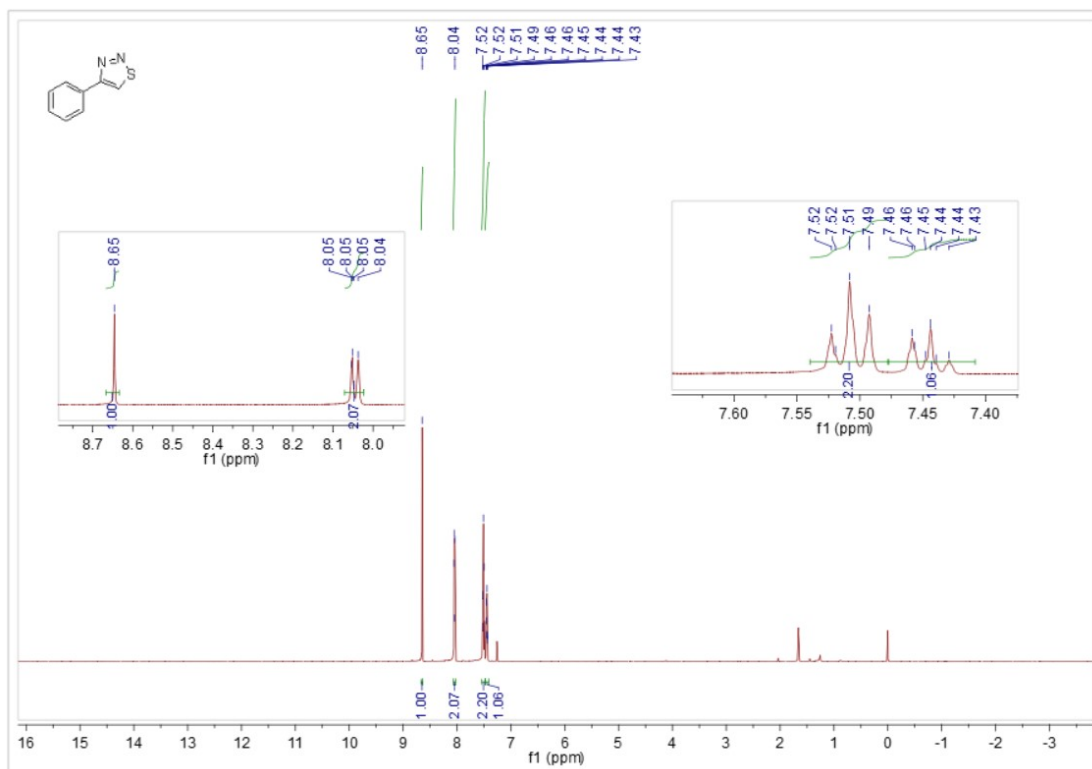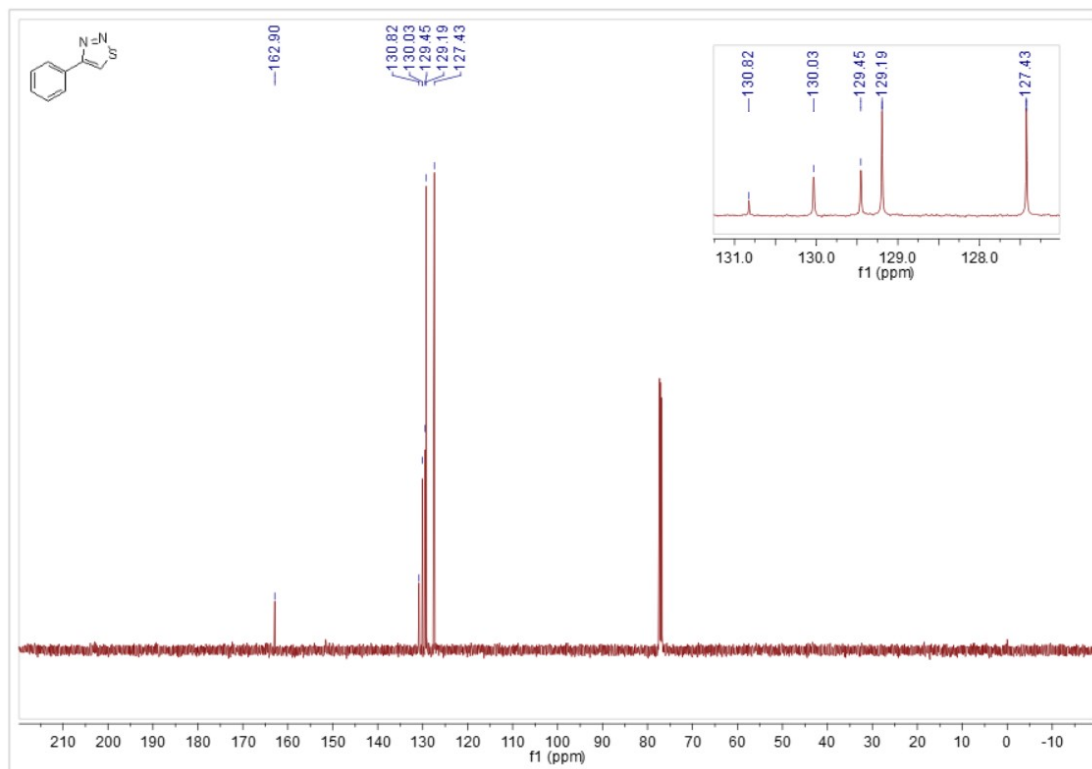

### 4-(*p*-Tolyl)-1,2,3-thiadiazole (1ea)

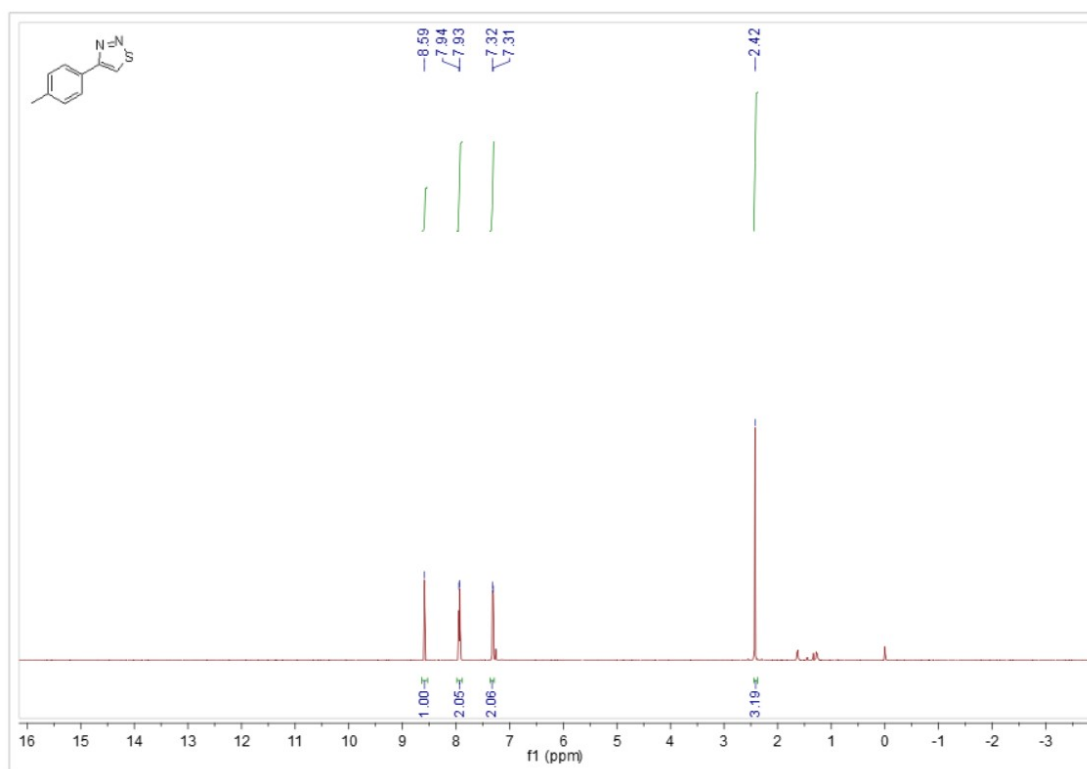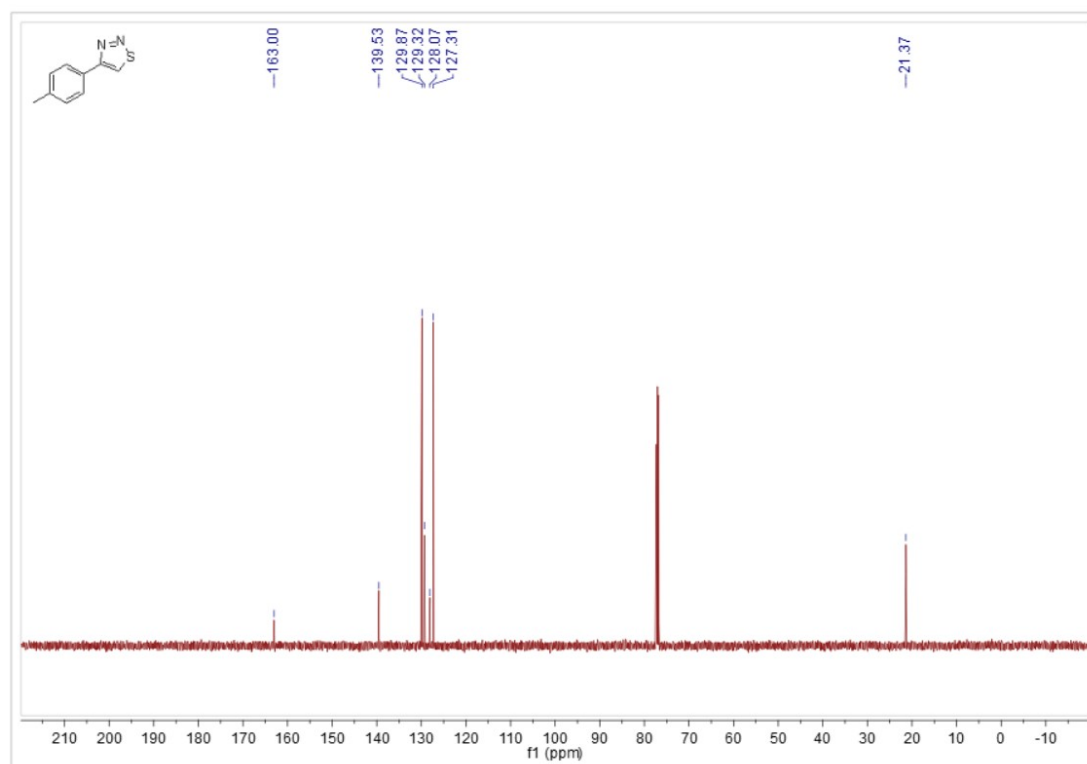

### (4-Methoxyphenyl)-1,2,3-thiadiazole (1b)

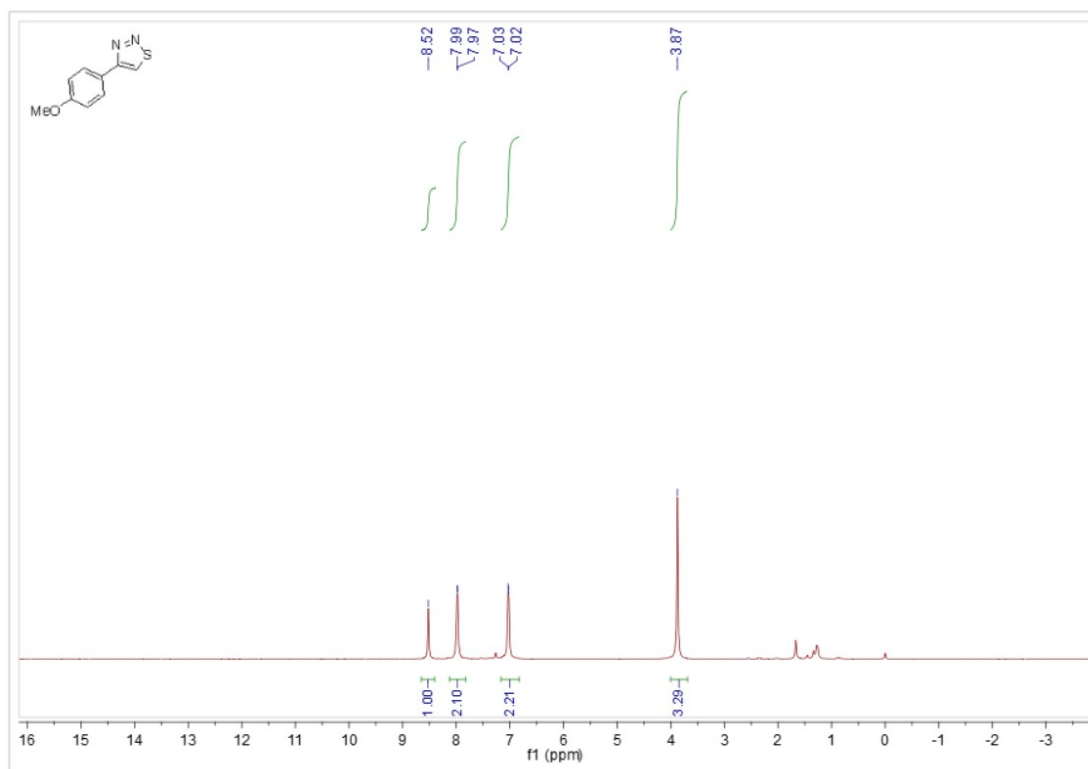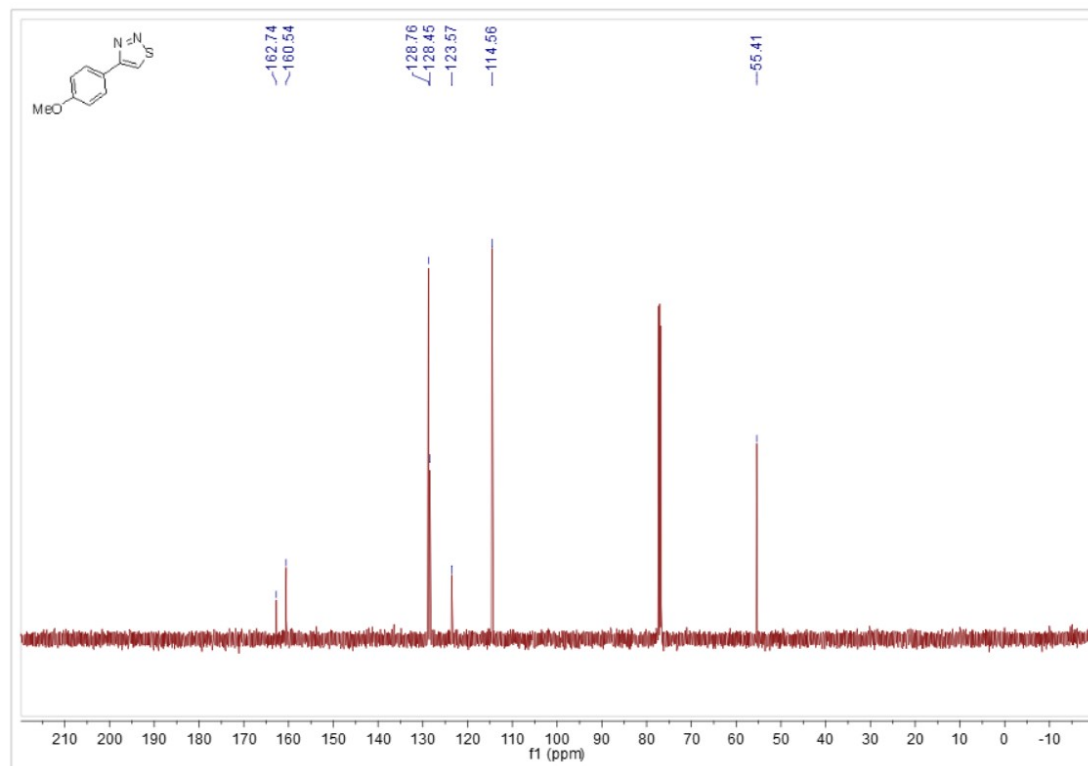

# (4-Chlorophenyl)-1,2,3-thiadiazole (1c)

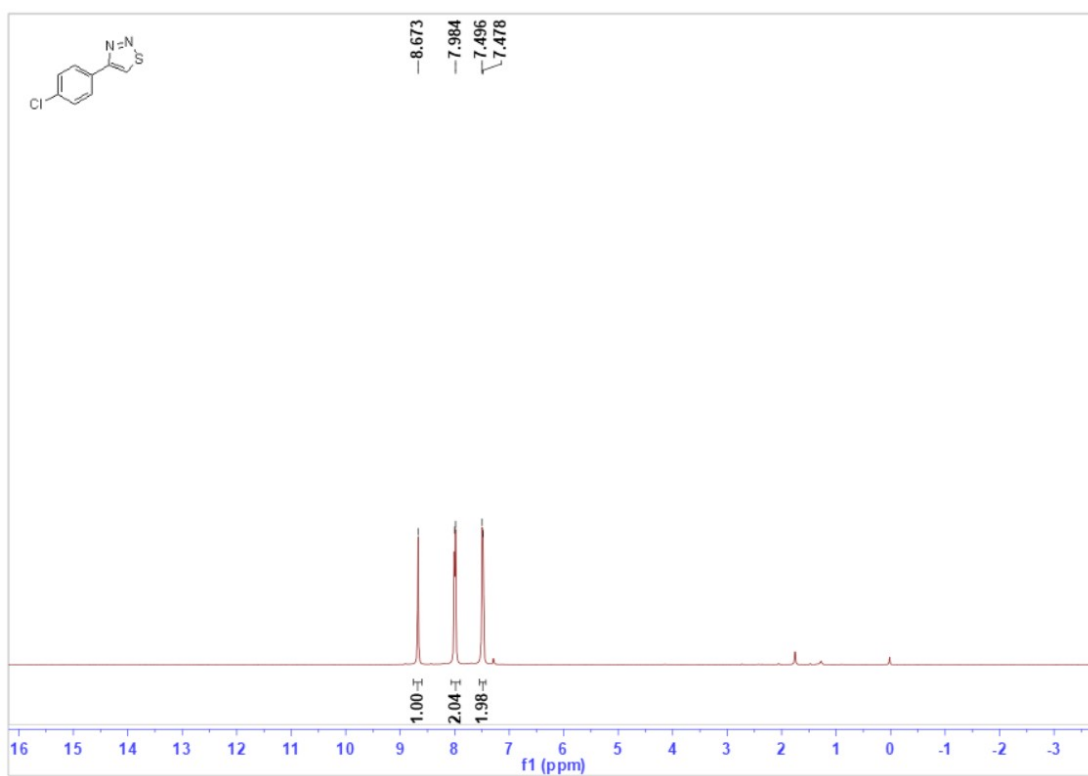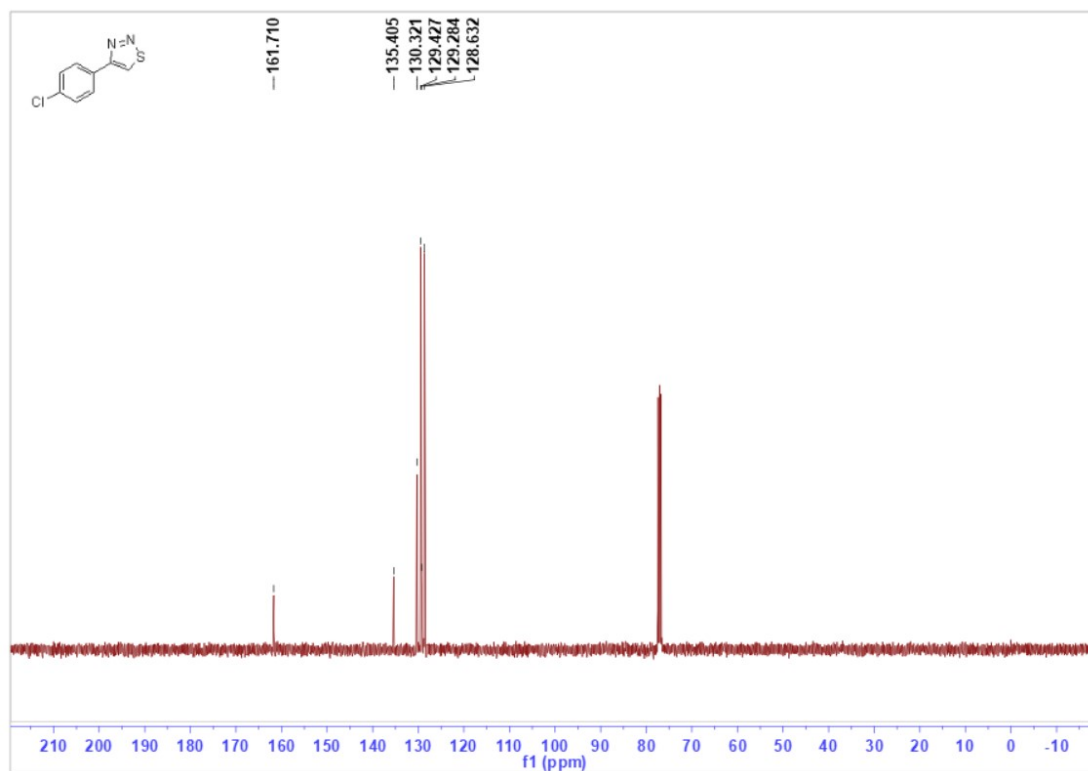

### (4-Bromophenyl)-1,2,3-thiadiazole (1ed)

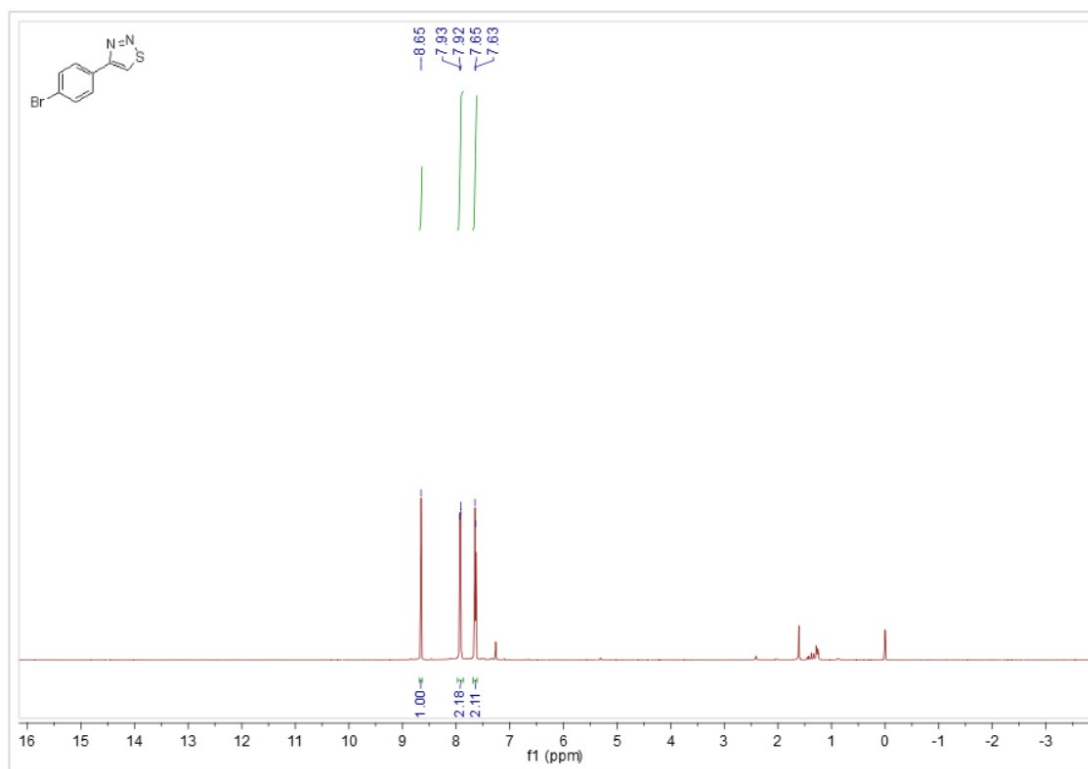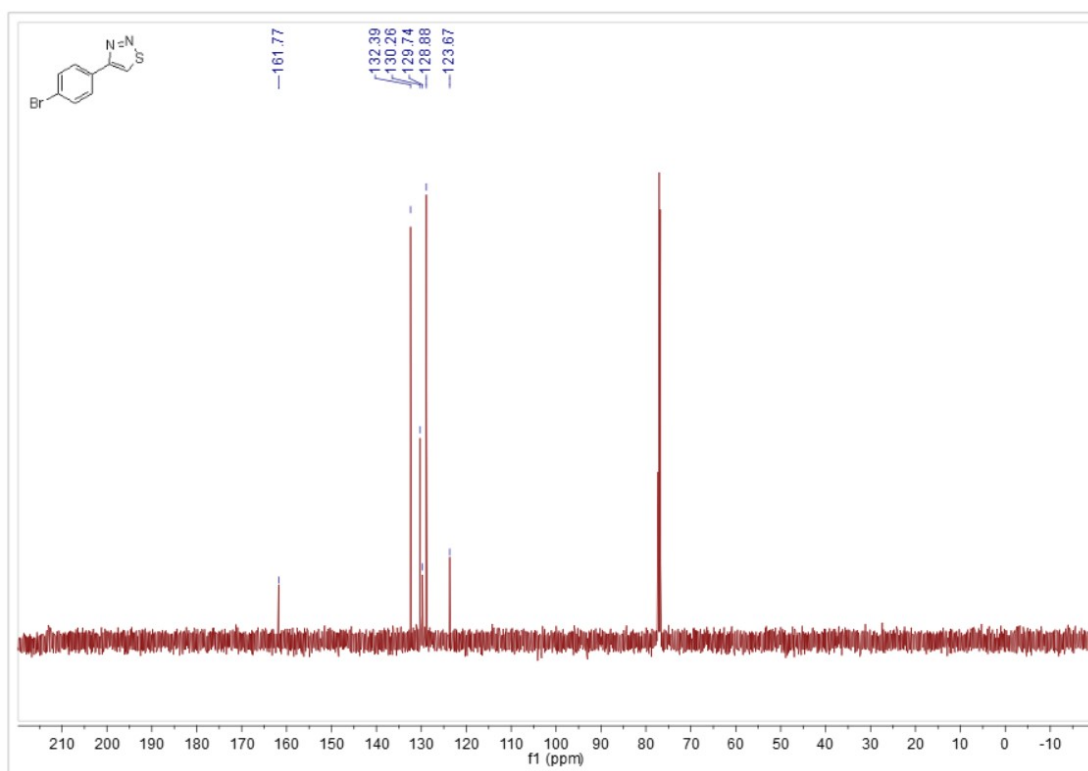

### 4-(1,2,3-Thiadiazol-4-yl)benzonitrile (1ee)

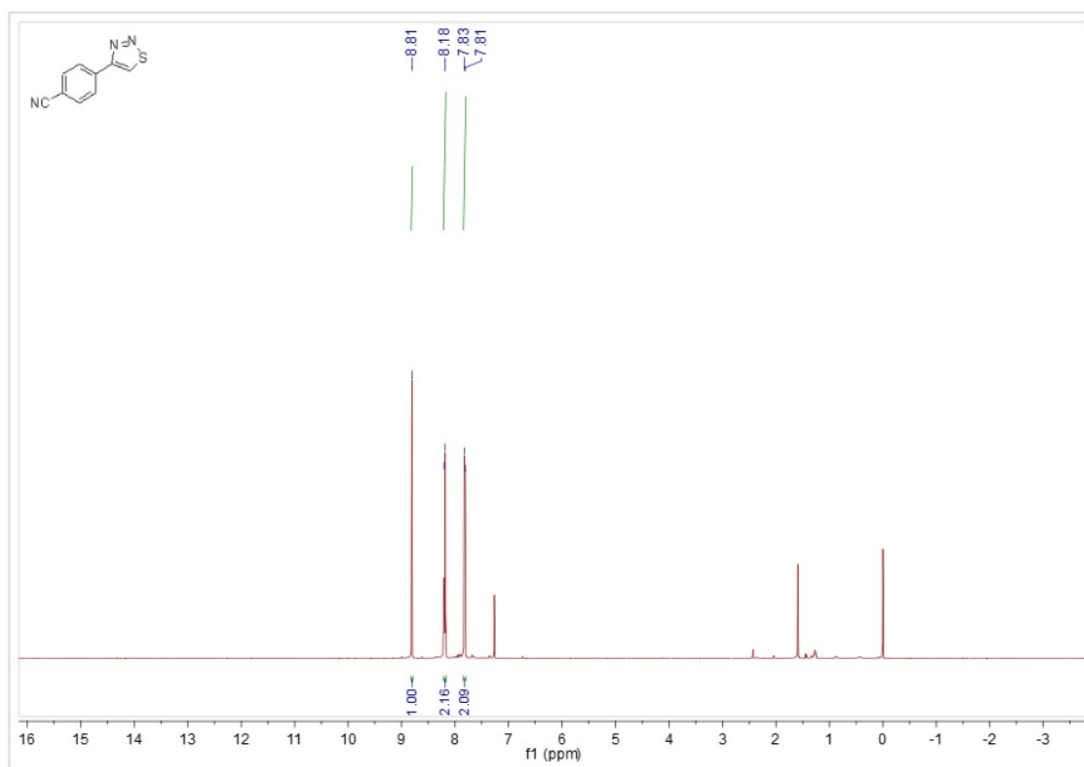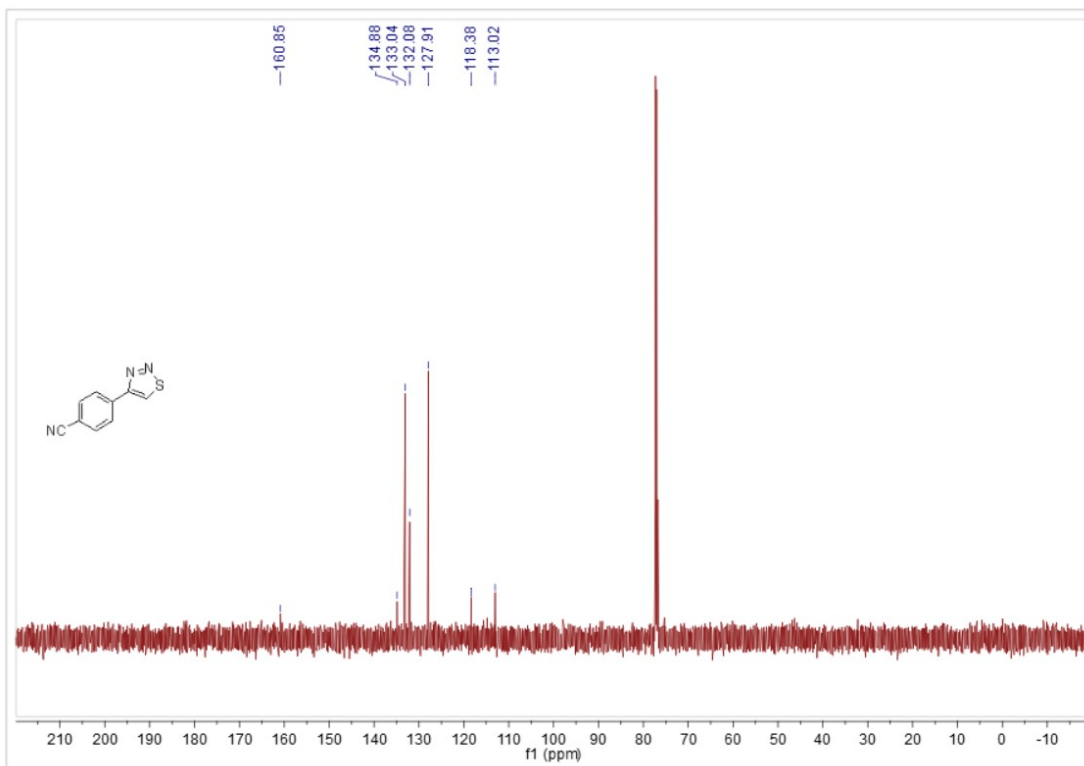

### (3-Fluorophenyl)-1,2,3-thiadiazole (1ef)

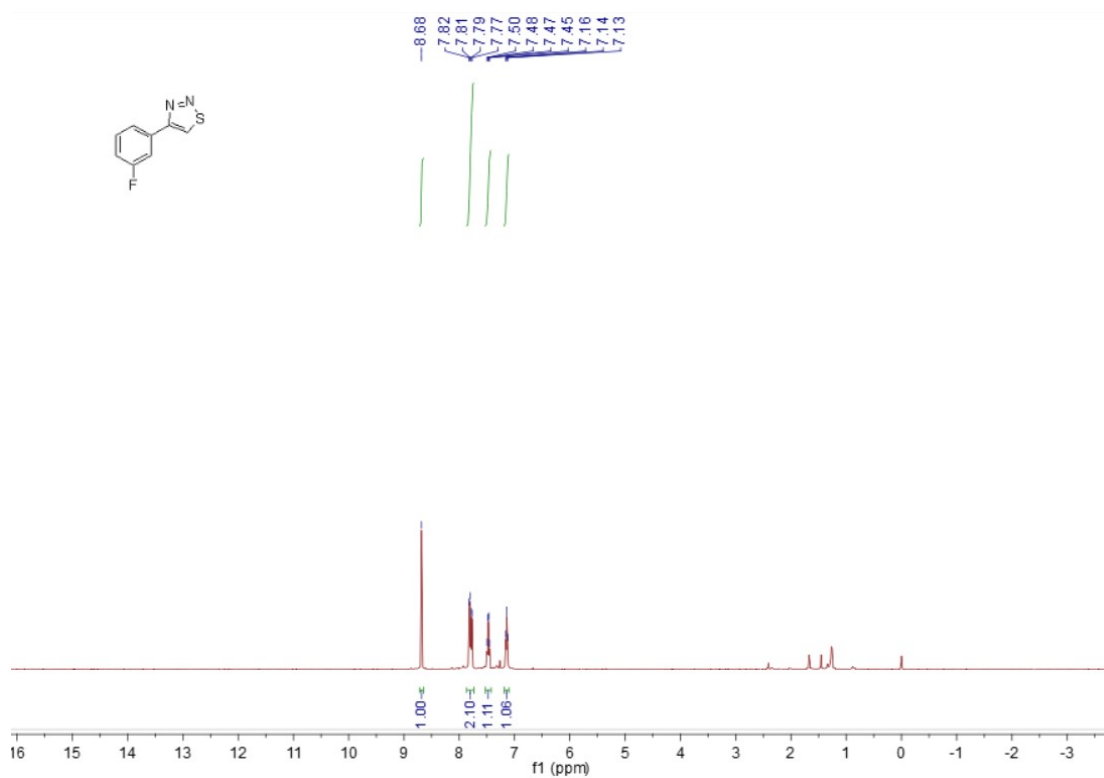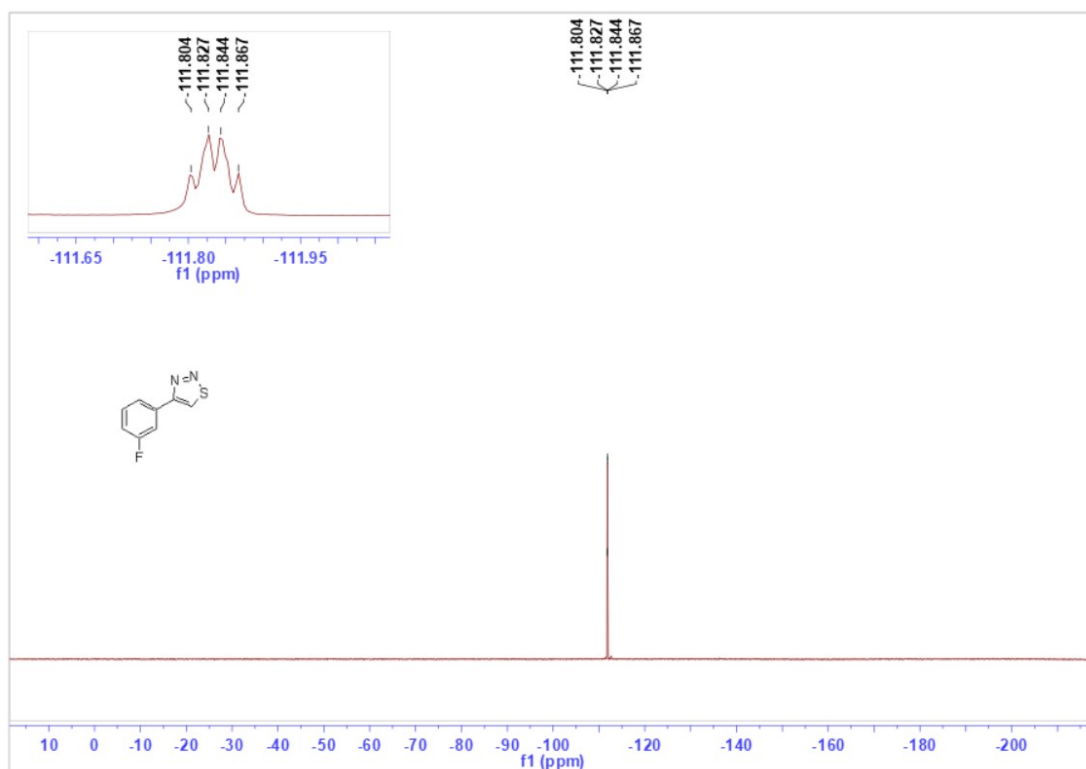



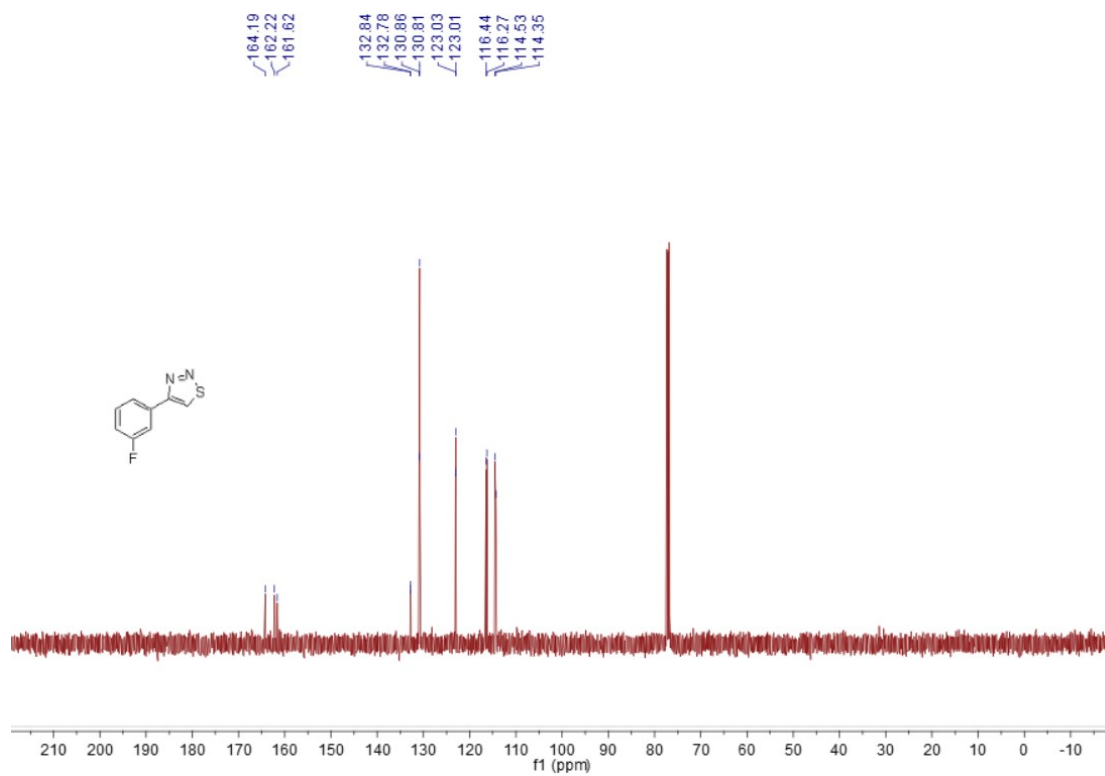

**(Benzo[d][1,3]dioxol-5-yl)-1,2,3-thiadiazole (1eg)**

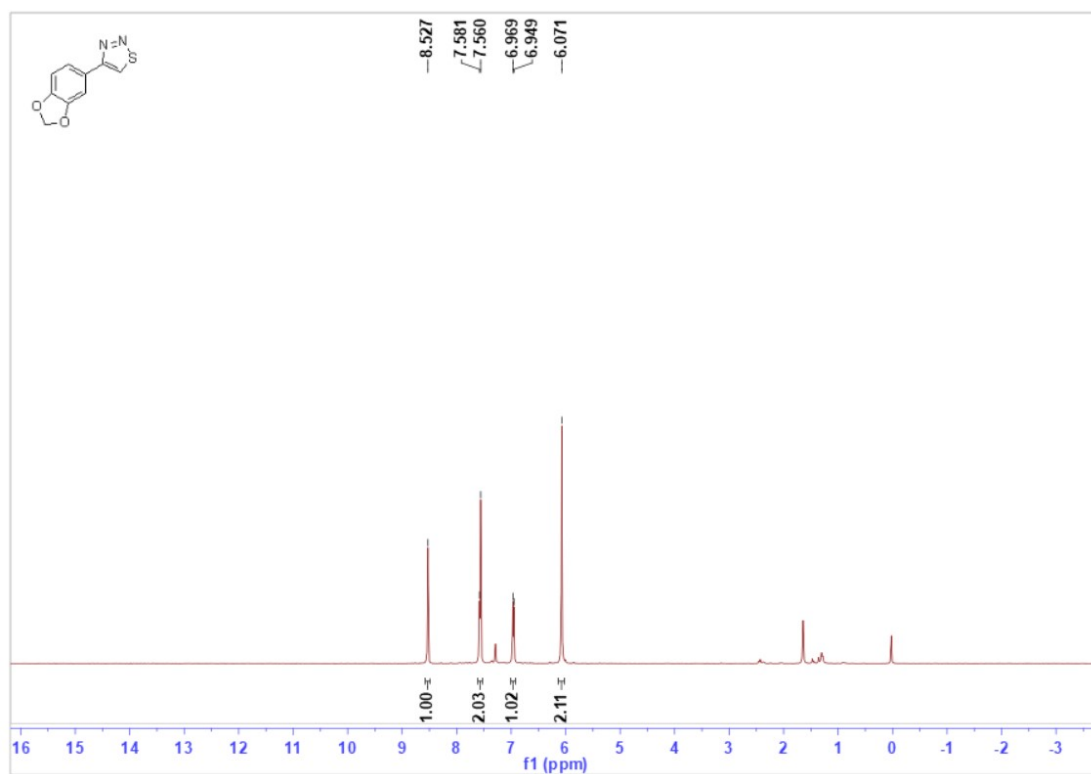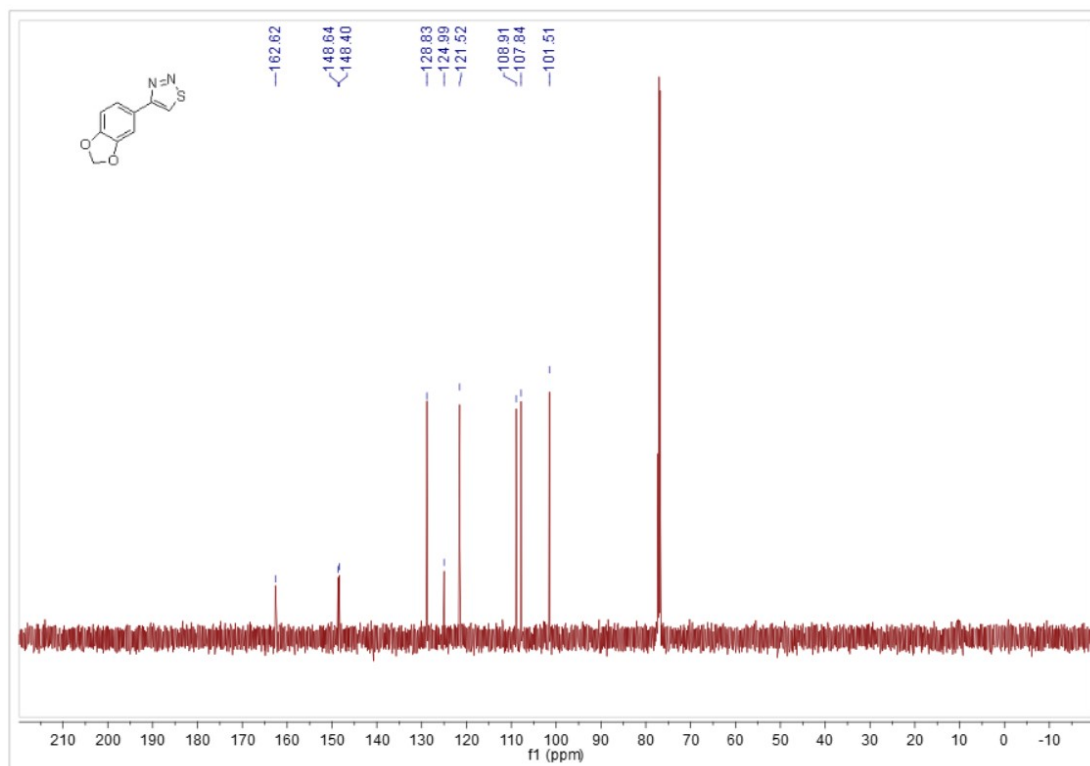

# 4-(Benzofuran-2-yl)-1,2,3-thiadiazole (1eh)

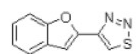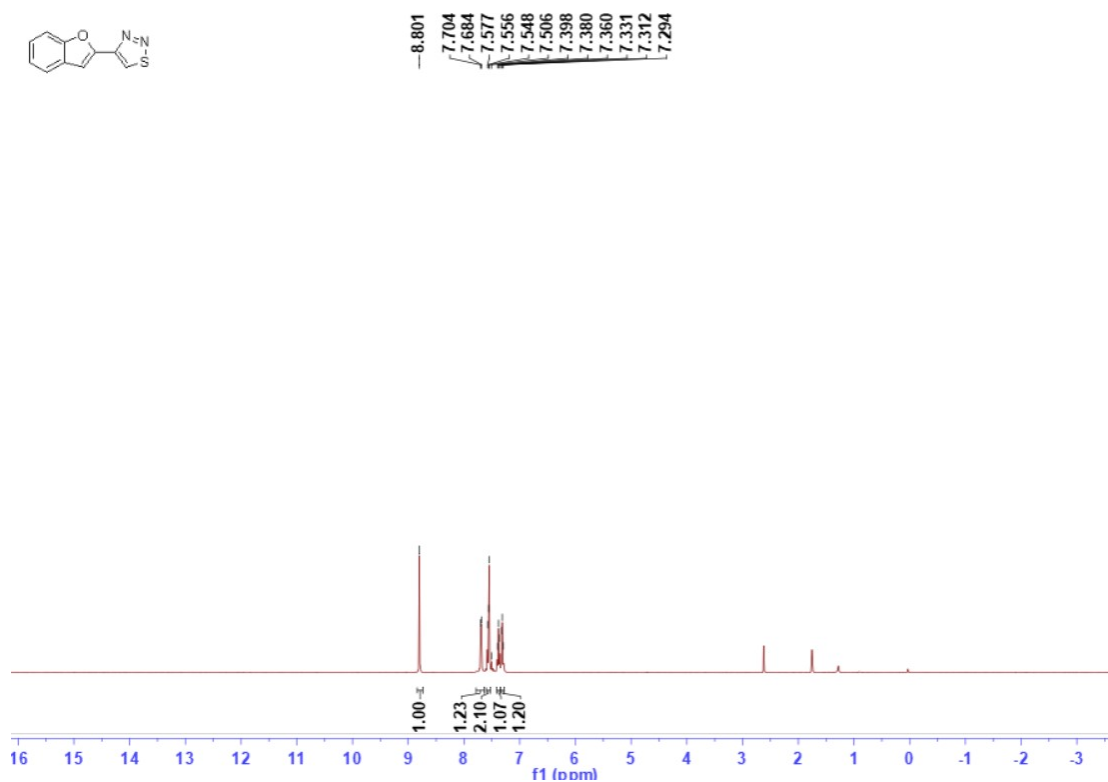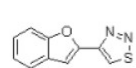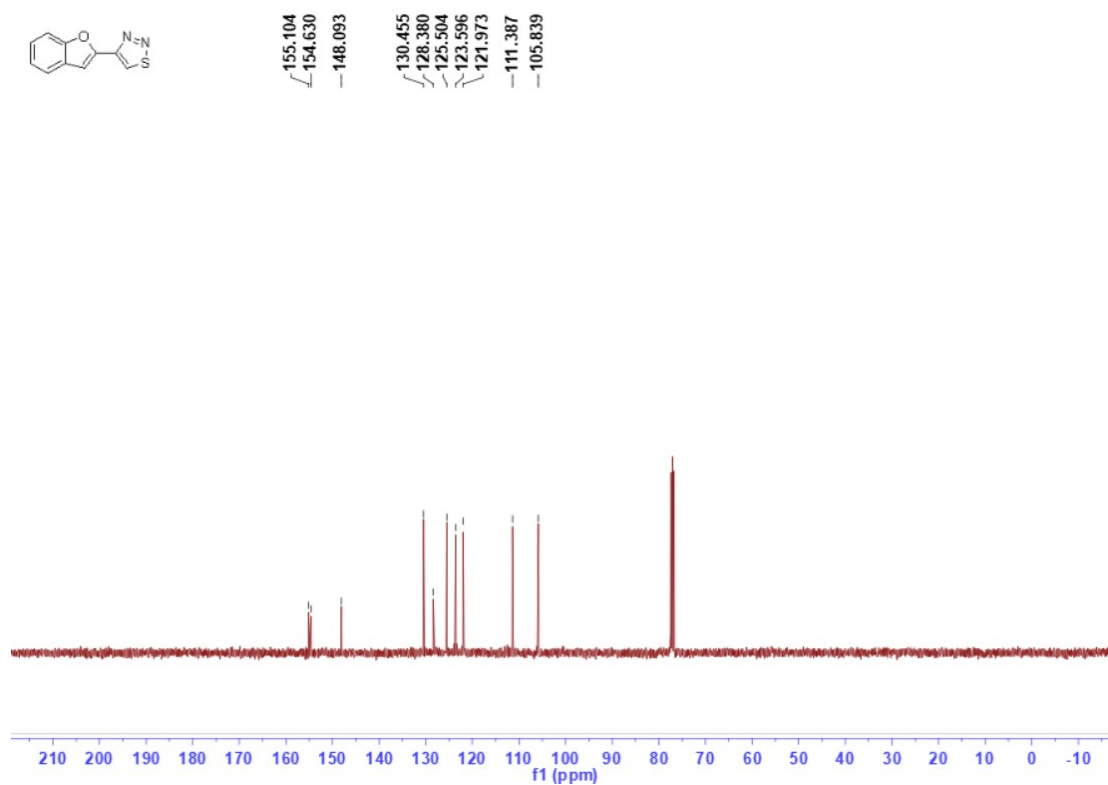

### 4-Cyclohexyl-1,2,3-thiadiazole (1e)

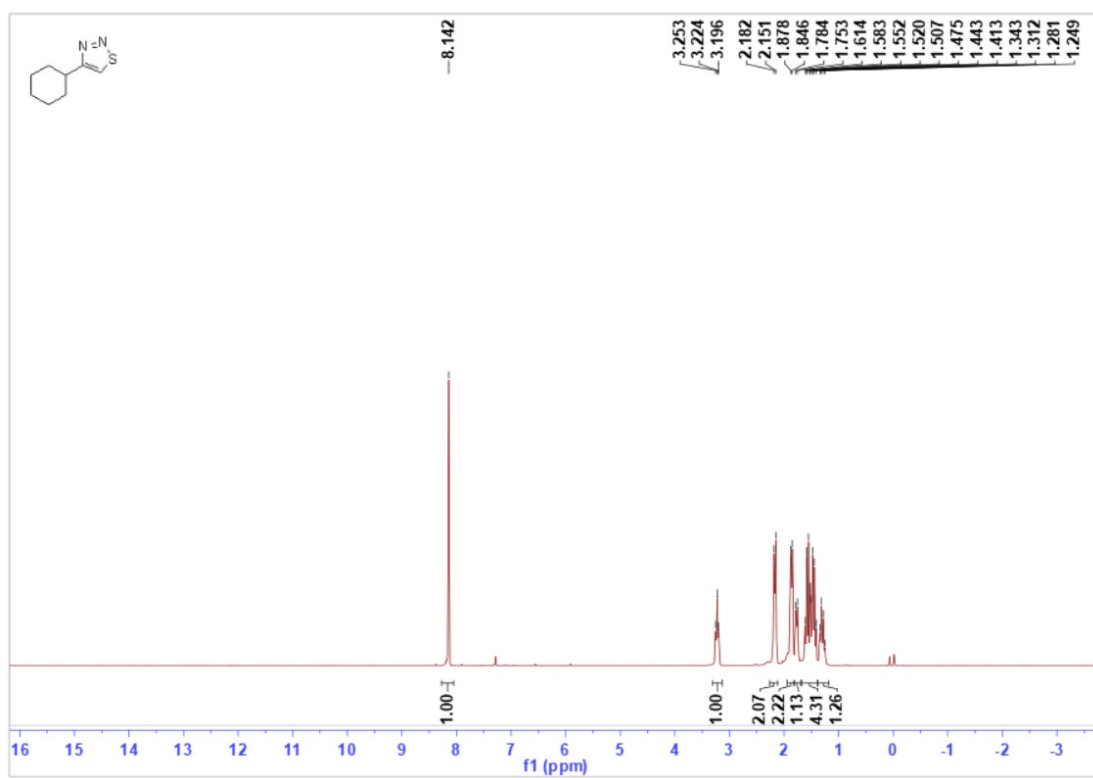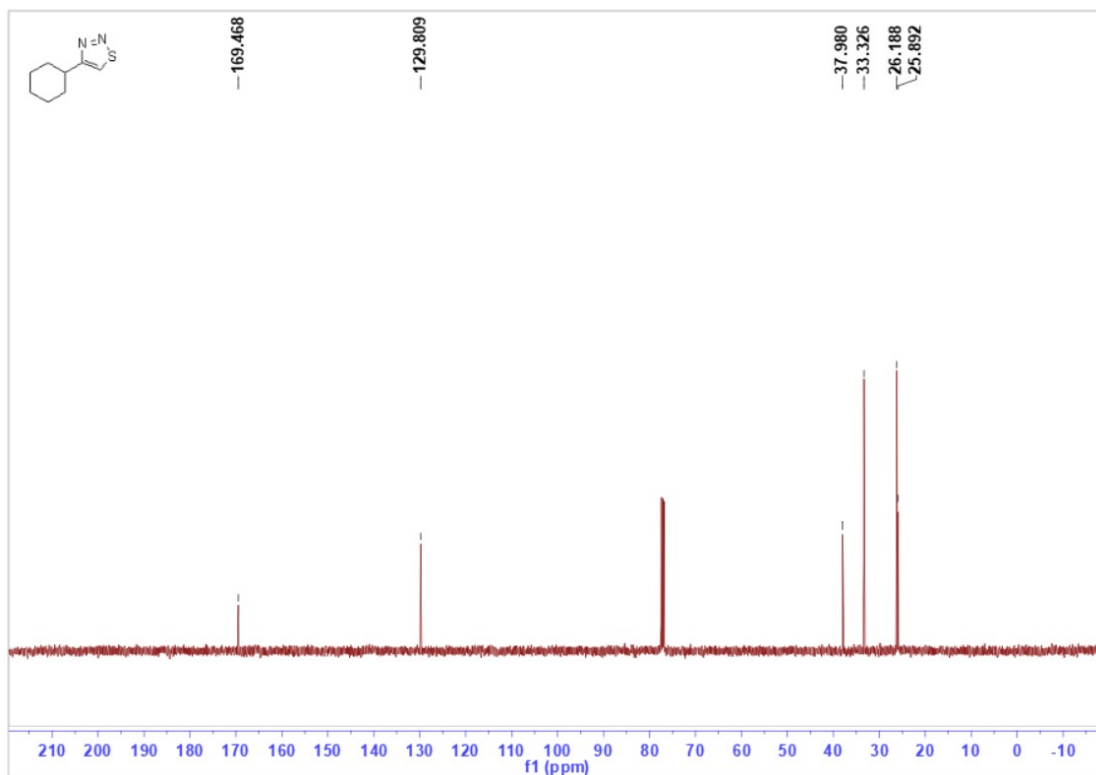

# 4-(Tert-butyl)-1,2,3-thiadiazole (1ej)

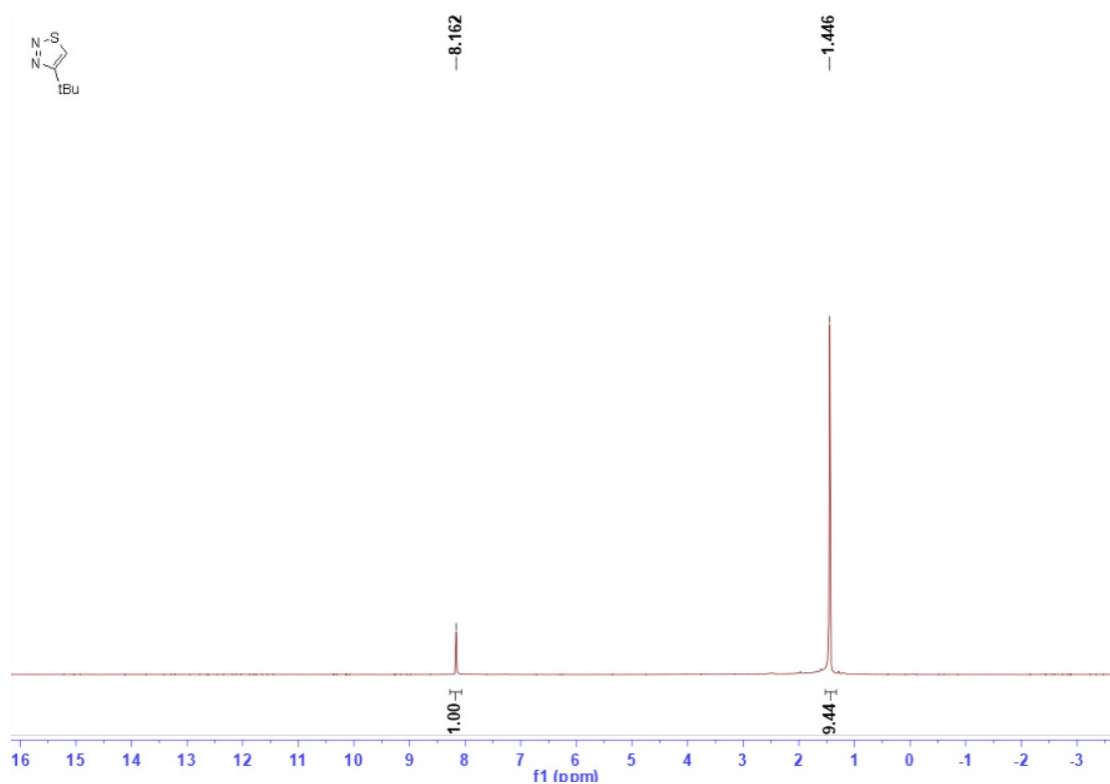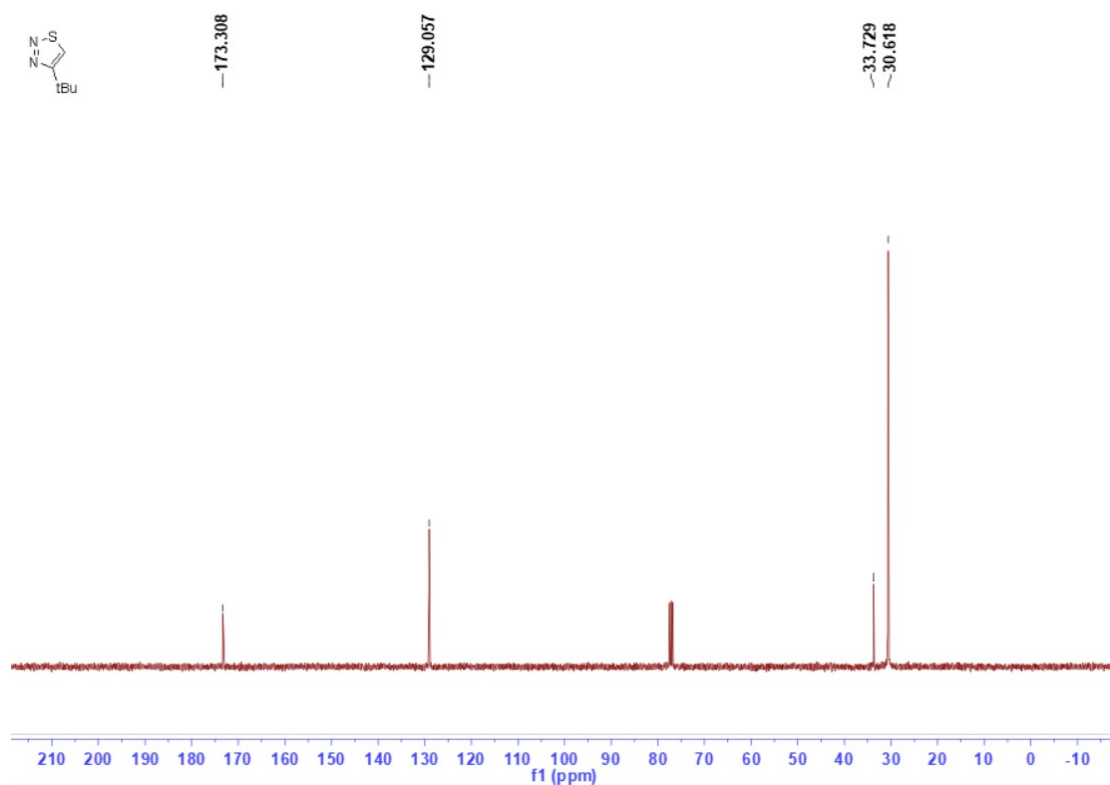

# Ethyl 1,2,3-thiadiazole-4-carboxylate (1ek)

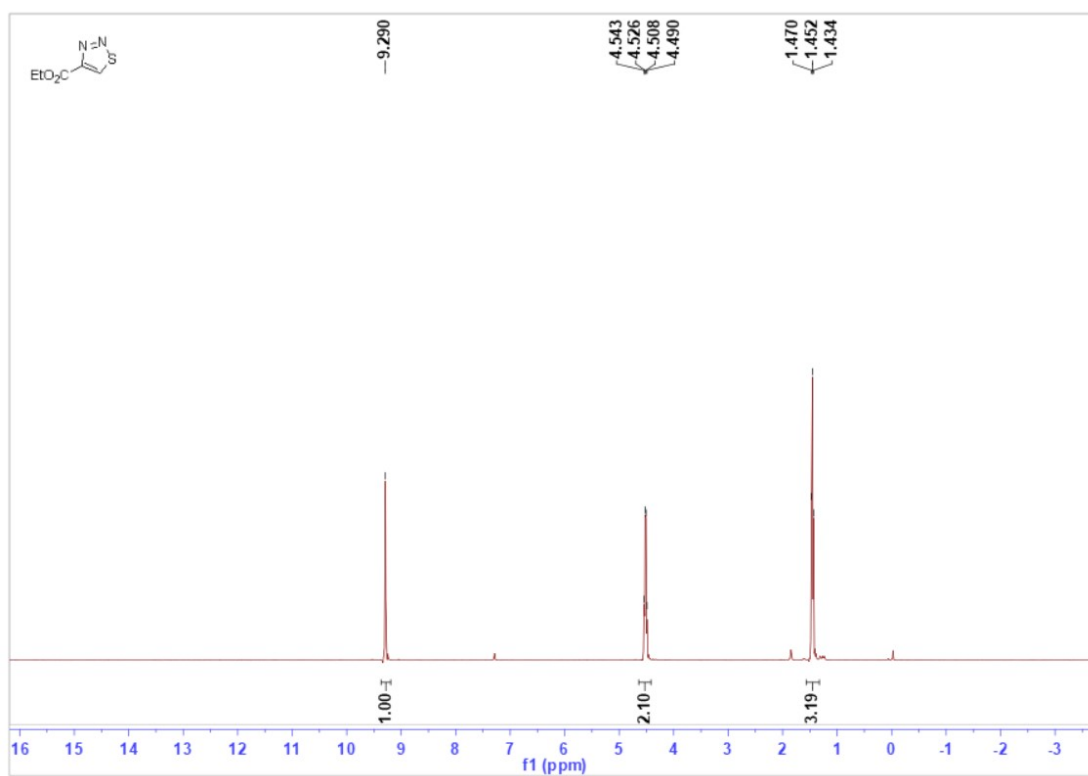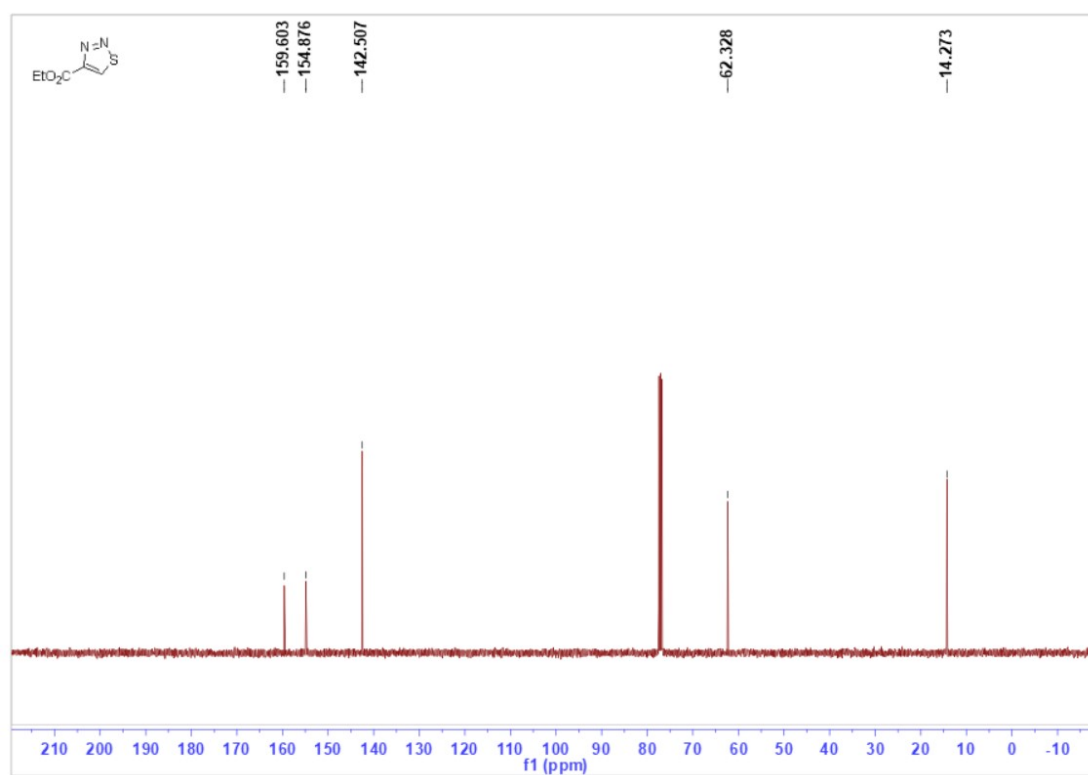

# 1,3-Di(1,2,3-thiadiazol-4-yl)benzene (1e)

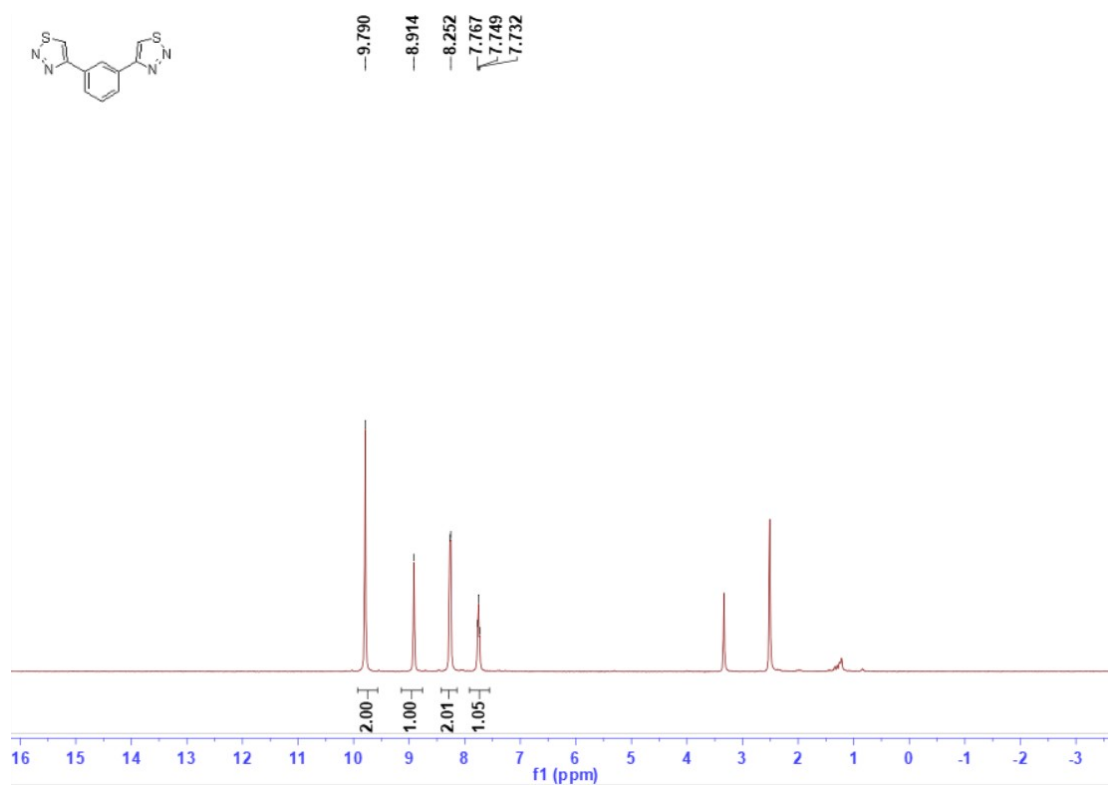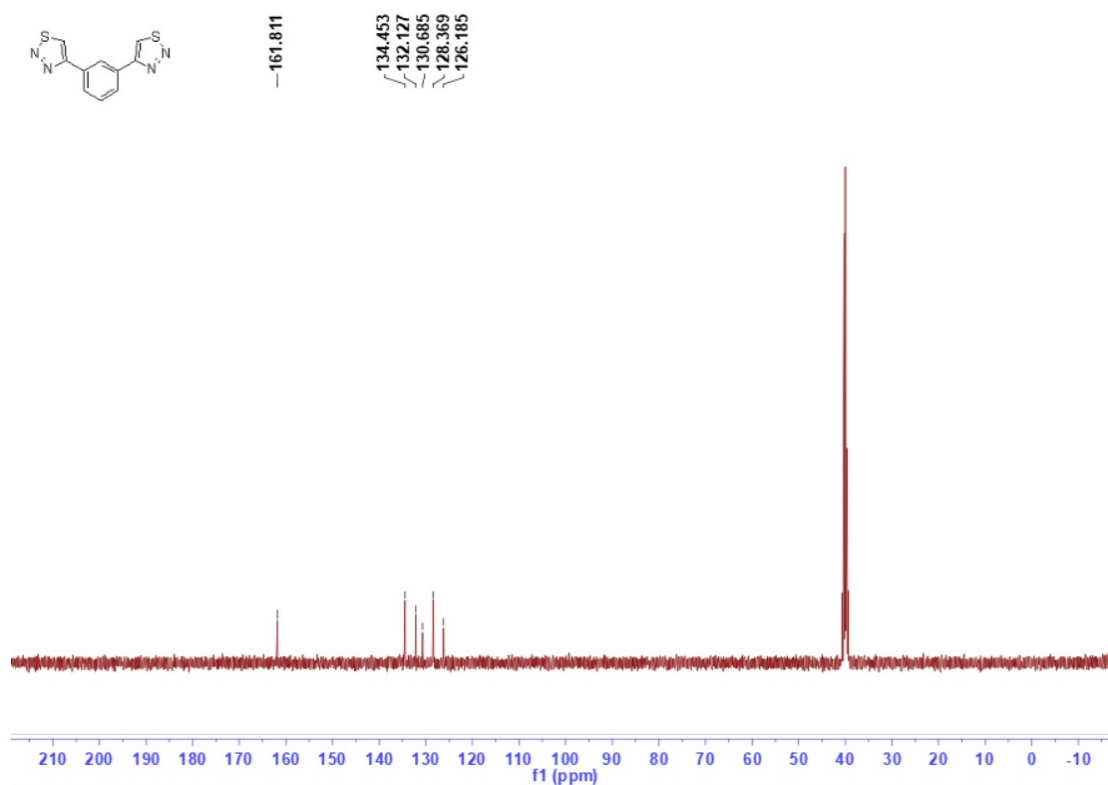

### 4-([1,1'-Biphenyl]-4-yl)-1,2,3-thiadiazole (1em)

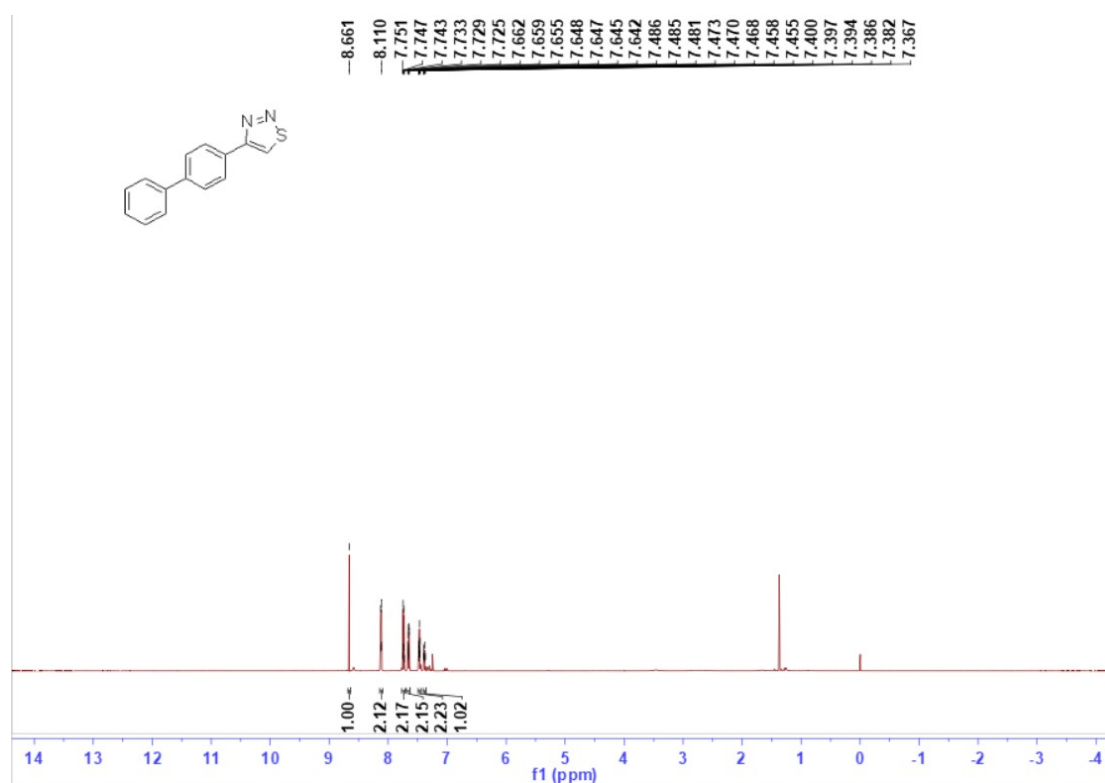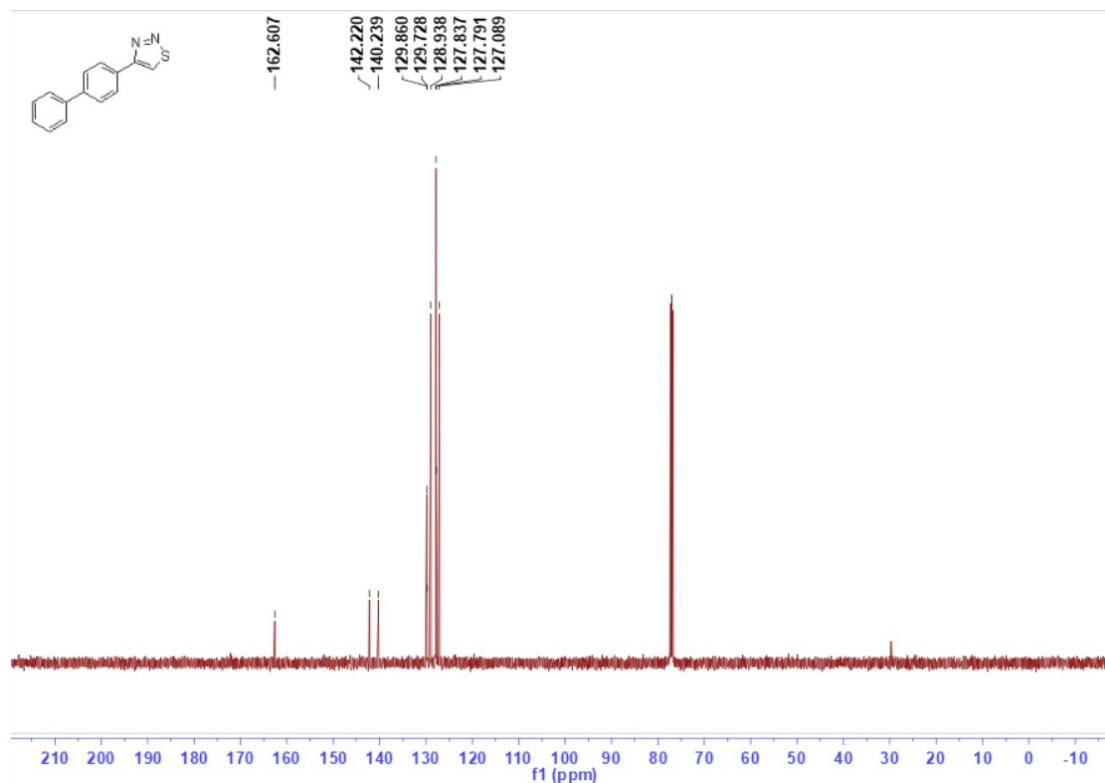



# 4-(4-(Trifluoromethoxy)phenyl)-1,2,3-thiadiazole (1en)

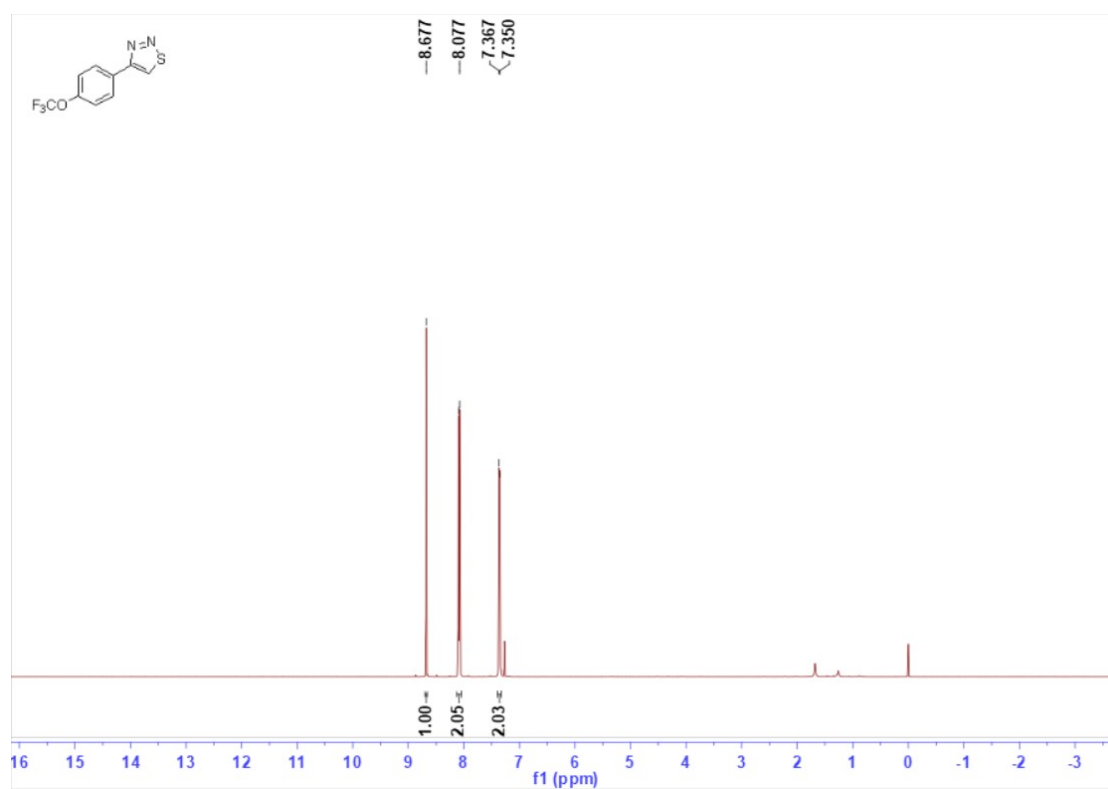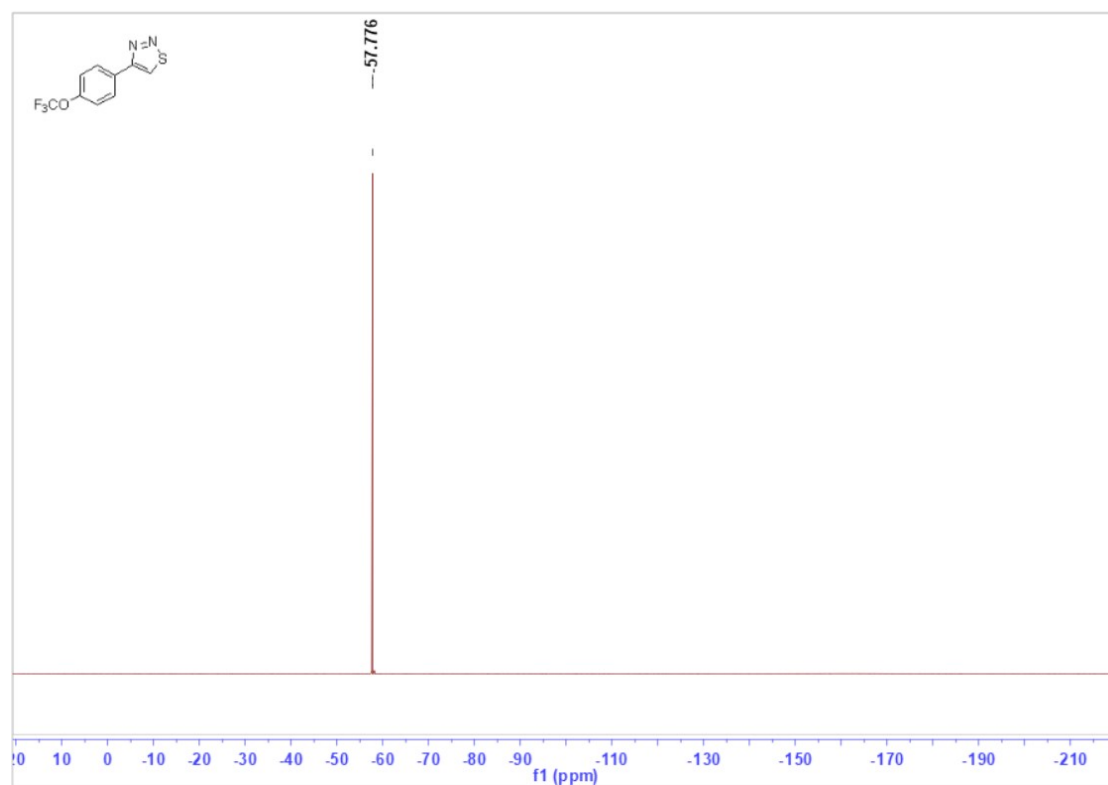

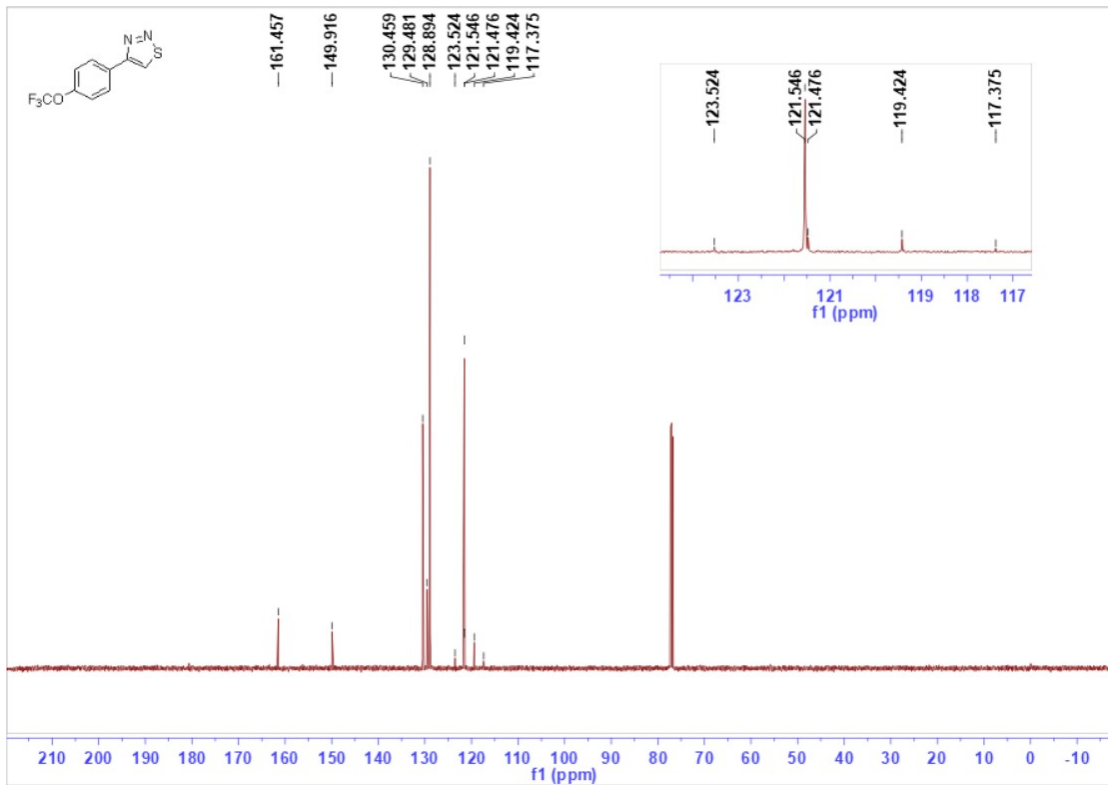

### 4-(4-(Methylthio)phenyl)-1,2,3-thiadiazole (1eo)

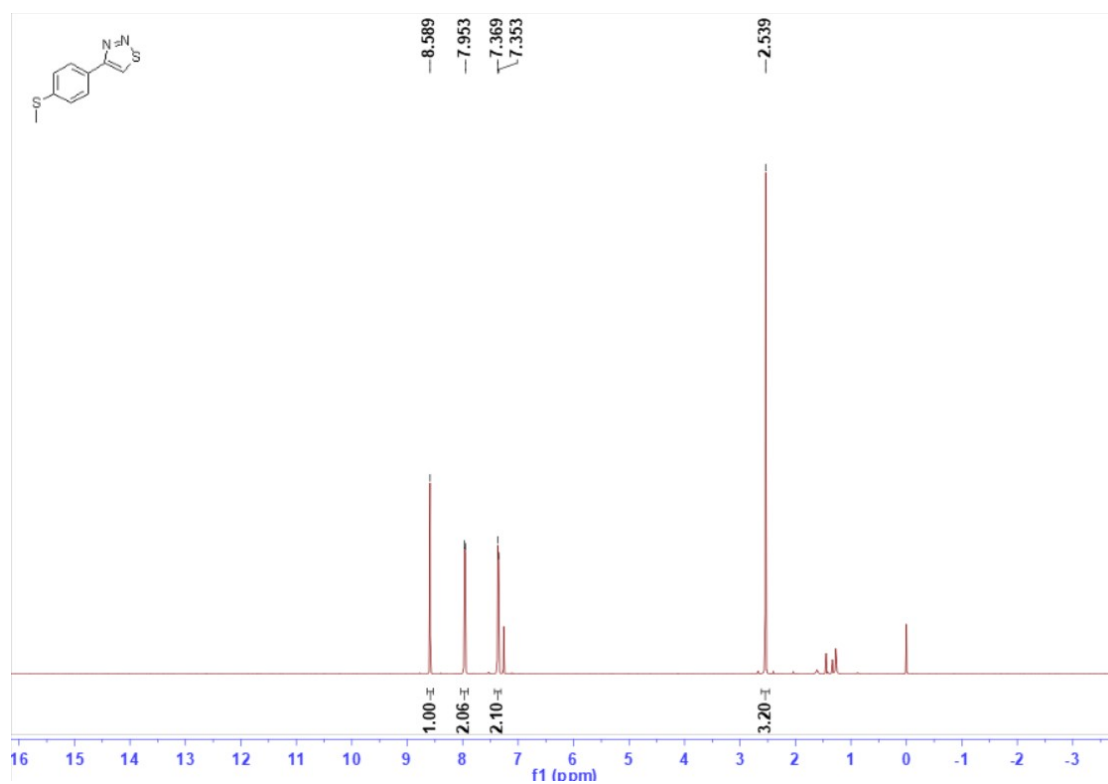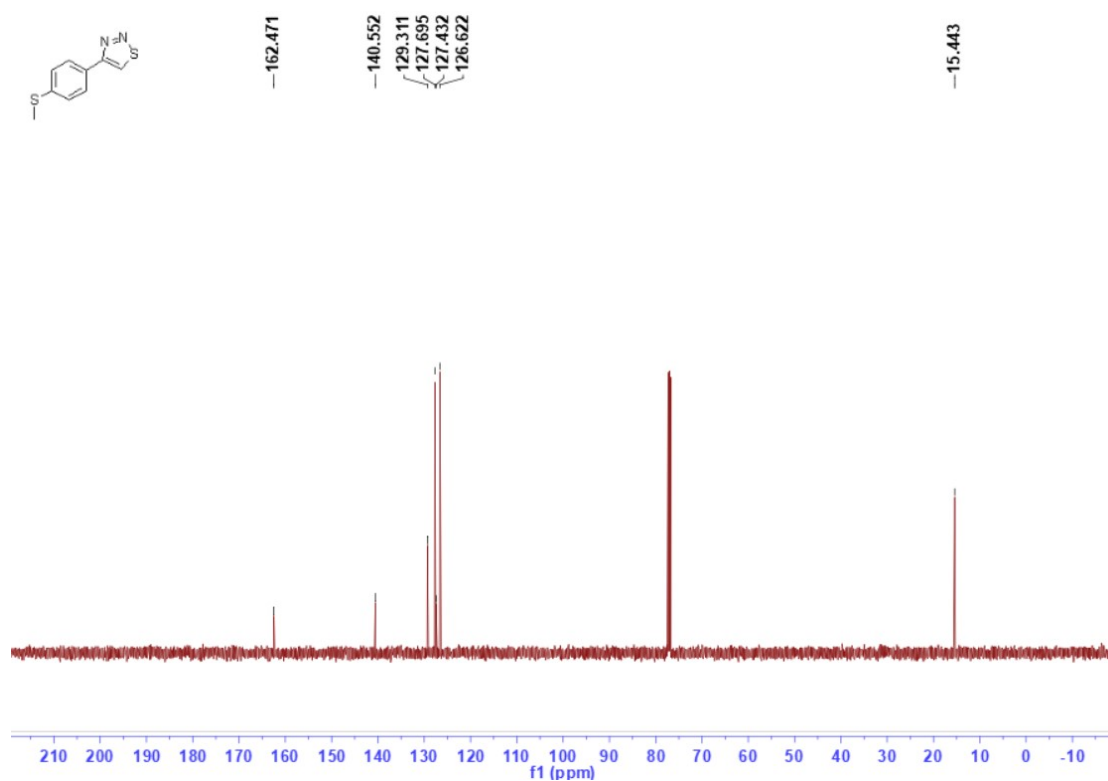

# 4-(4-(4,4,5,5-Tetramethyl-1,3,2-dioxaborolan-2-yl)phenyl)-1,2,3-thiadiazole (1ep)

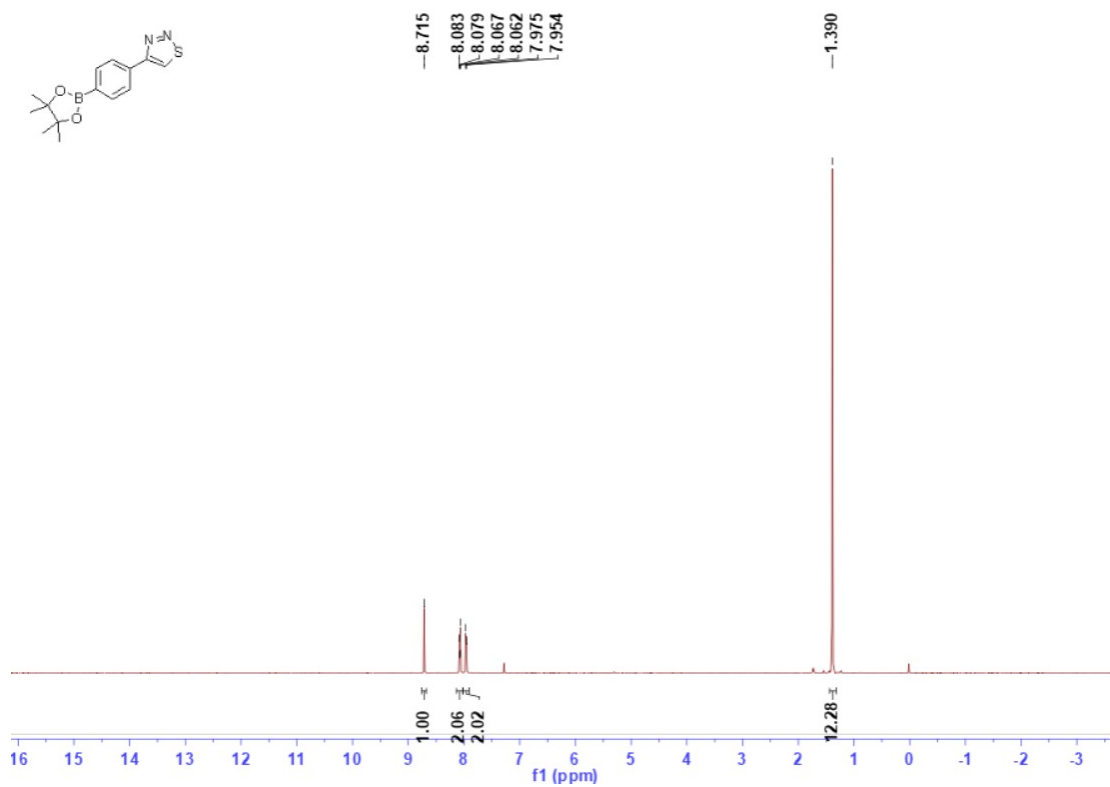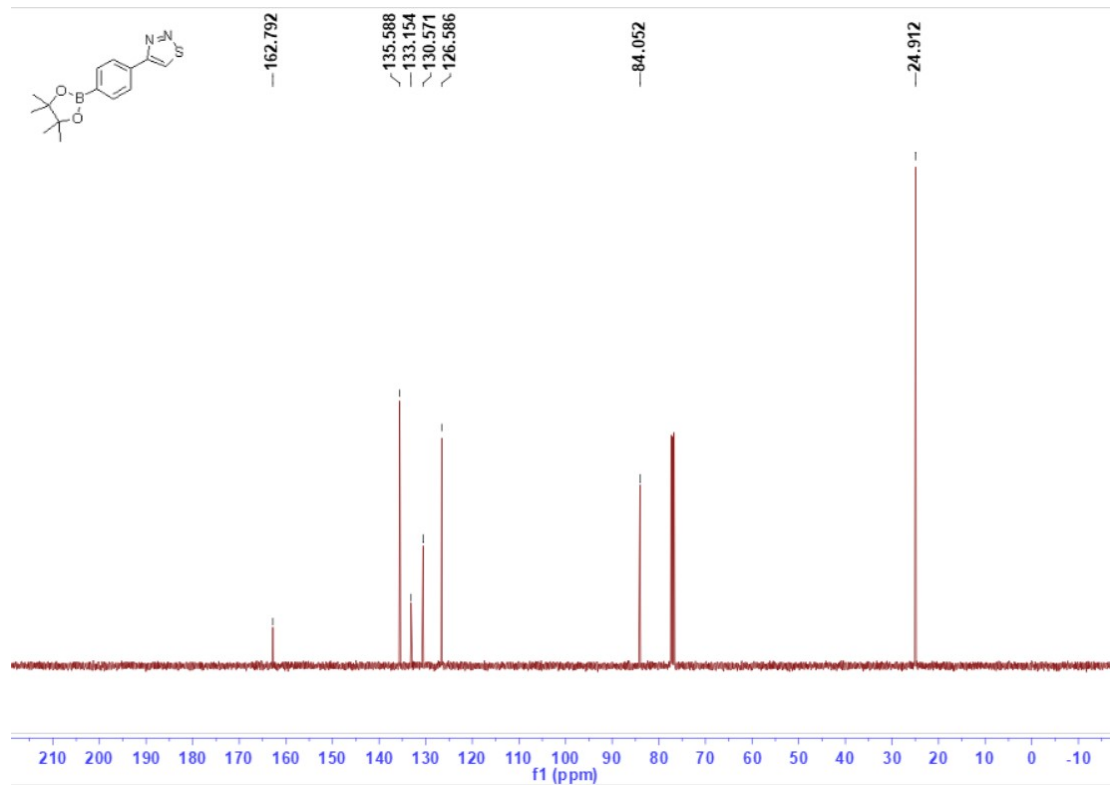

**(4-(1,2,3-Thiadiazol-4-yl)phenyl)(morpholino)methanone (1eq)**

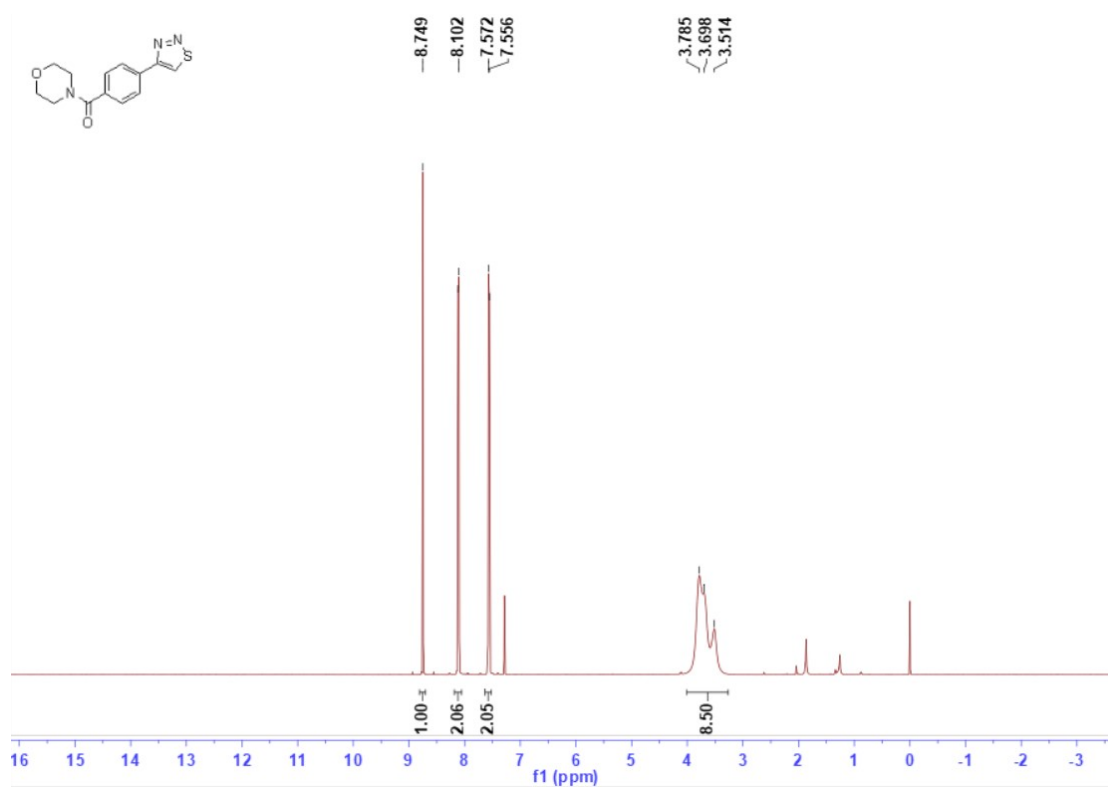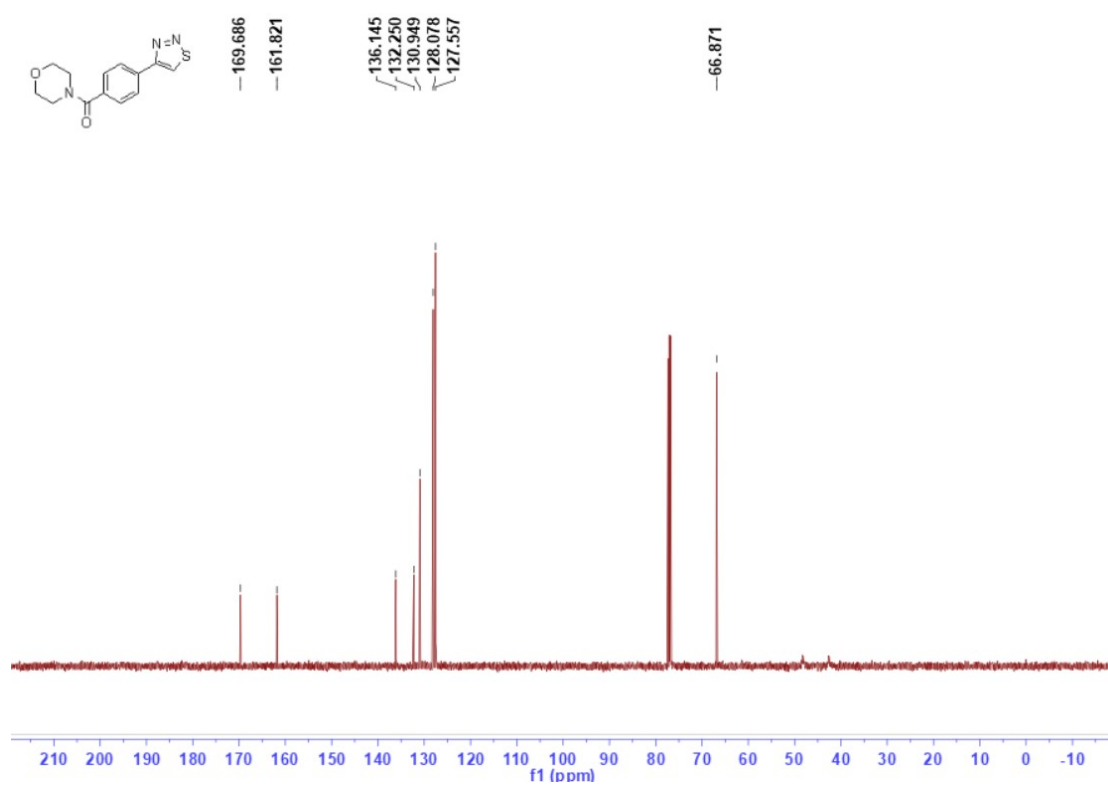

# Morpholino(1,2,3-thiadiazol-4-yl)methanone (1er)

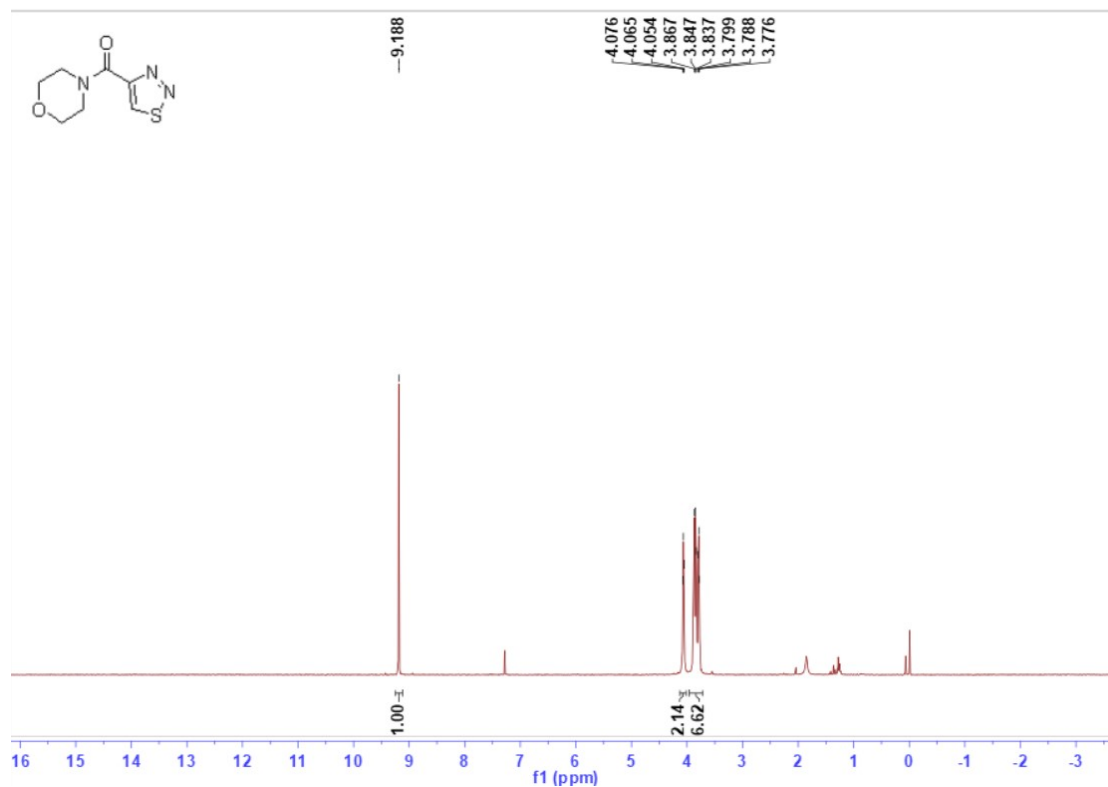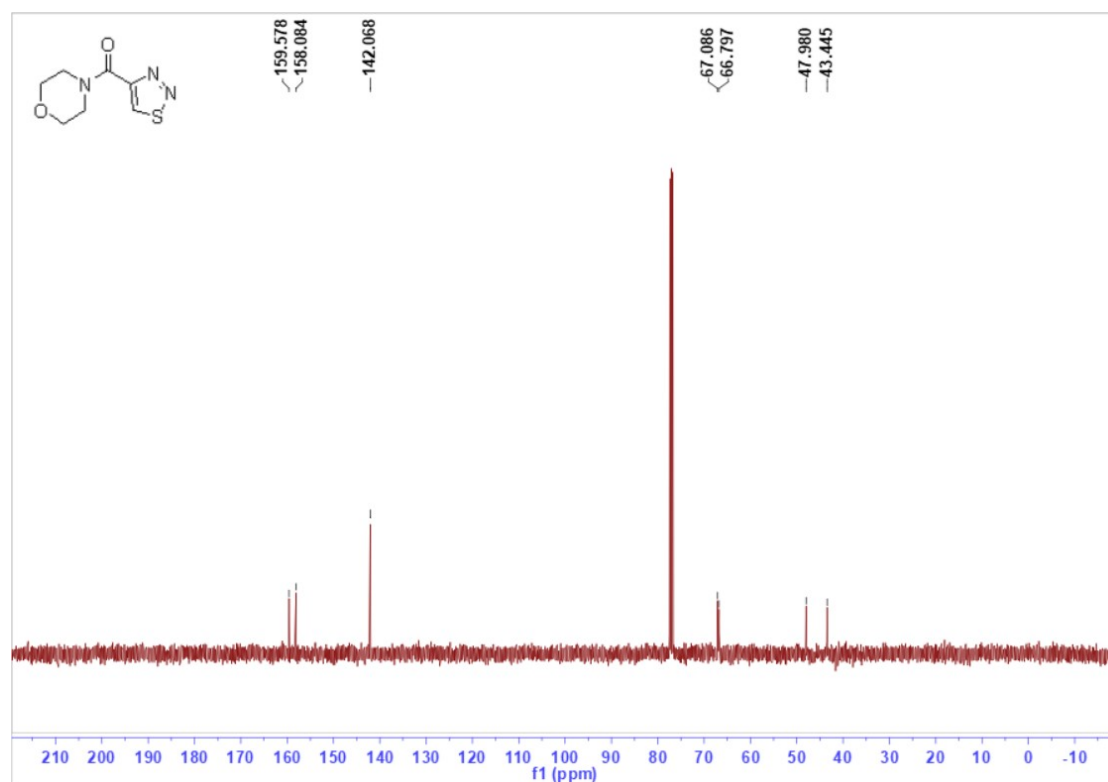

### 4-(1,2,3-Thiadiazol-4-yl)phenol (1et)

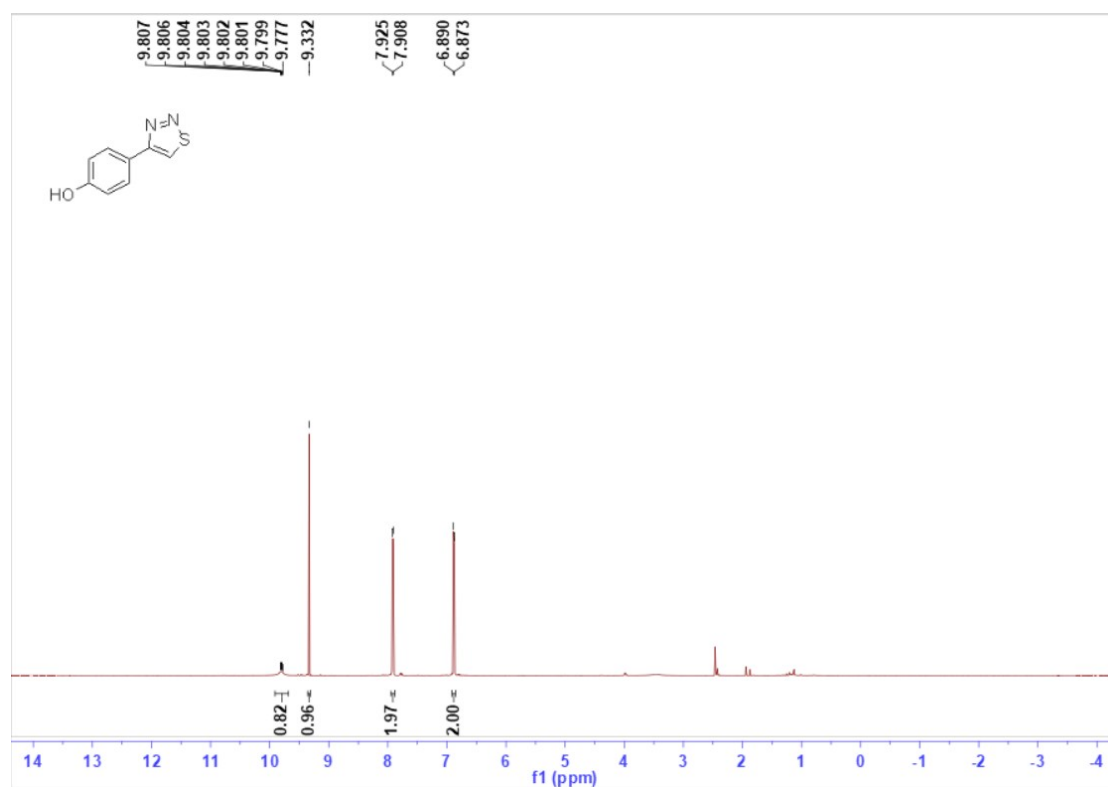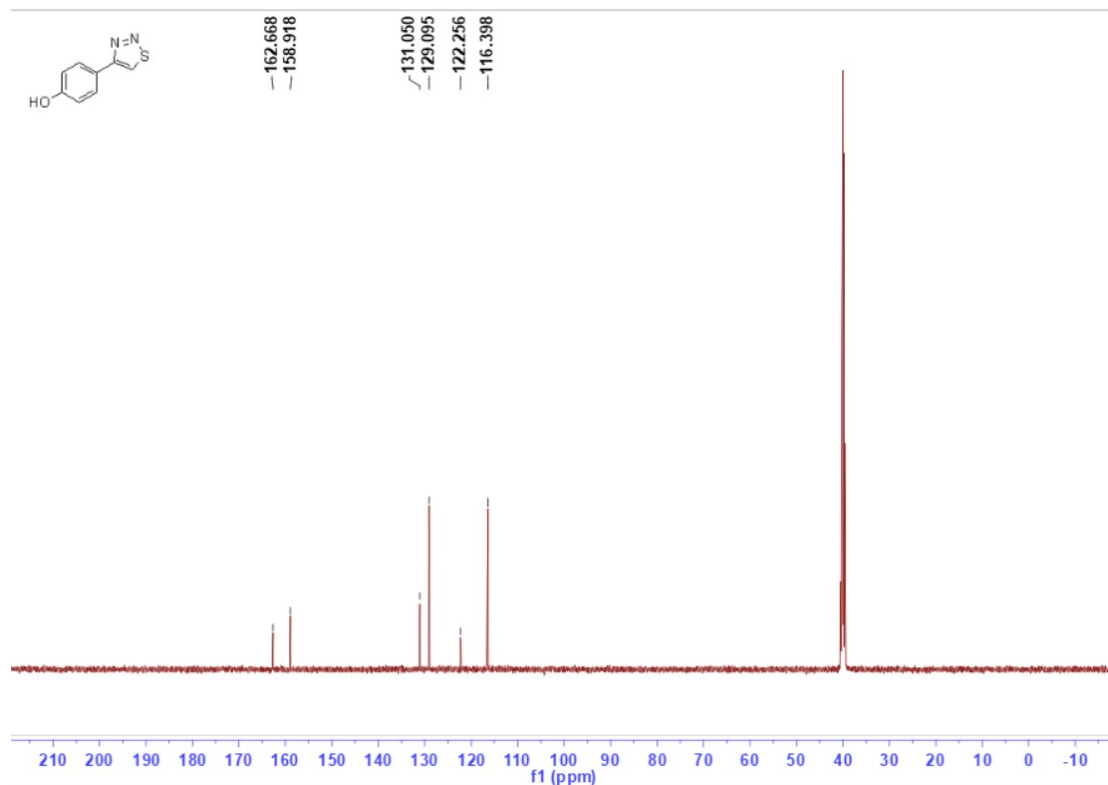

# 4-(Thiophen-2-yl)-1,2,3-thiadiazole (1eu)

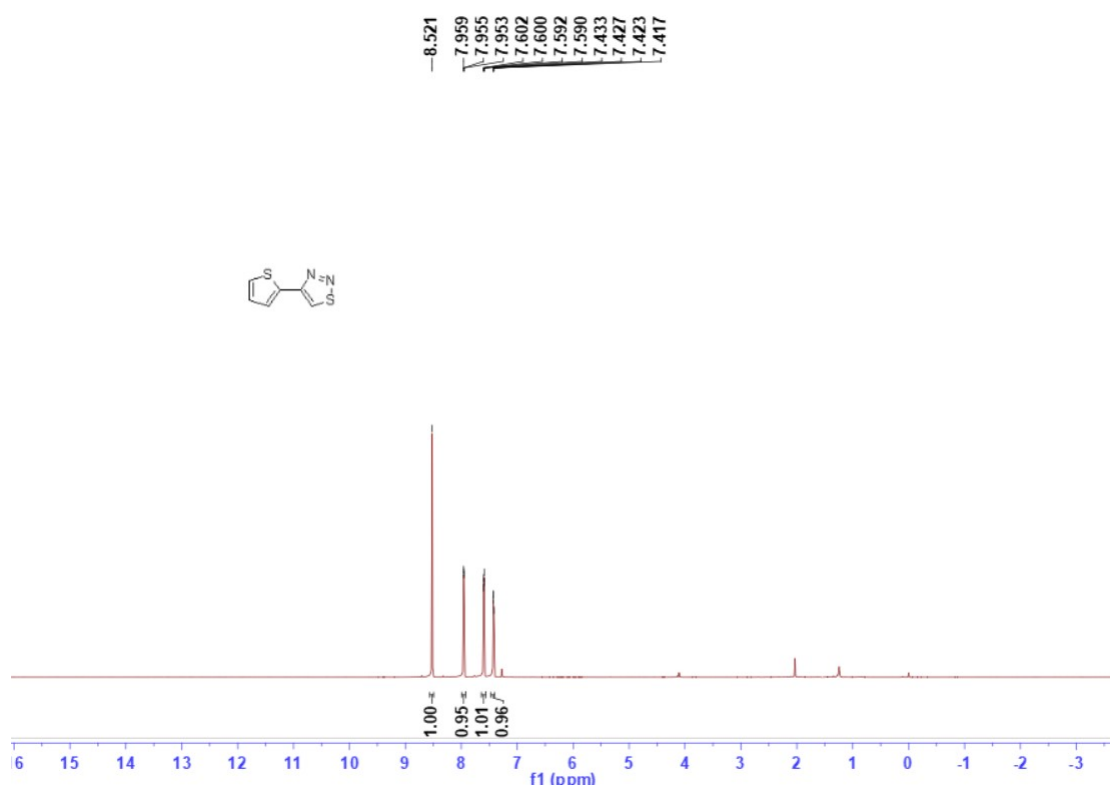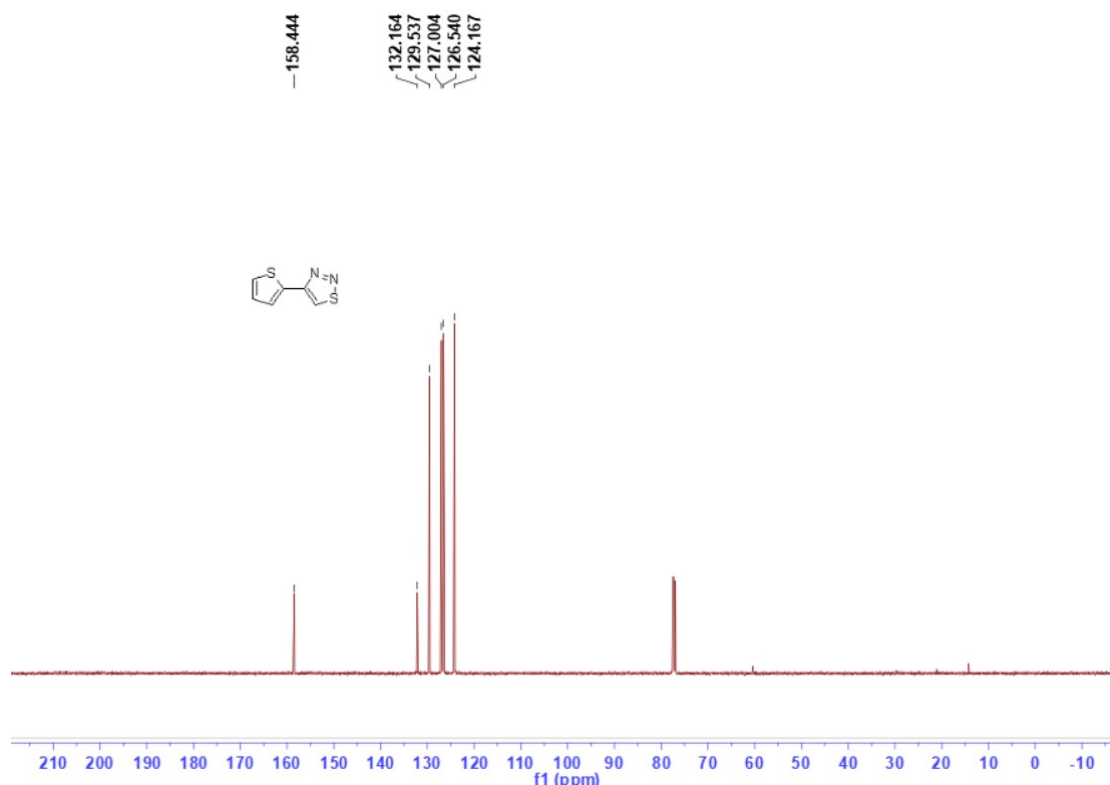



# 4-(pyridin-2-yl)-1,2,3-thiadiazole (1ew)

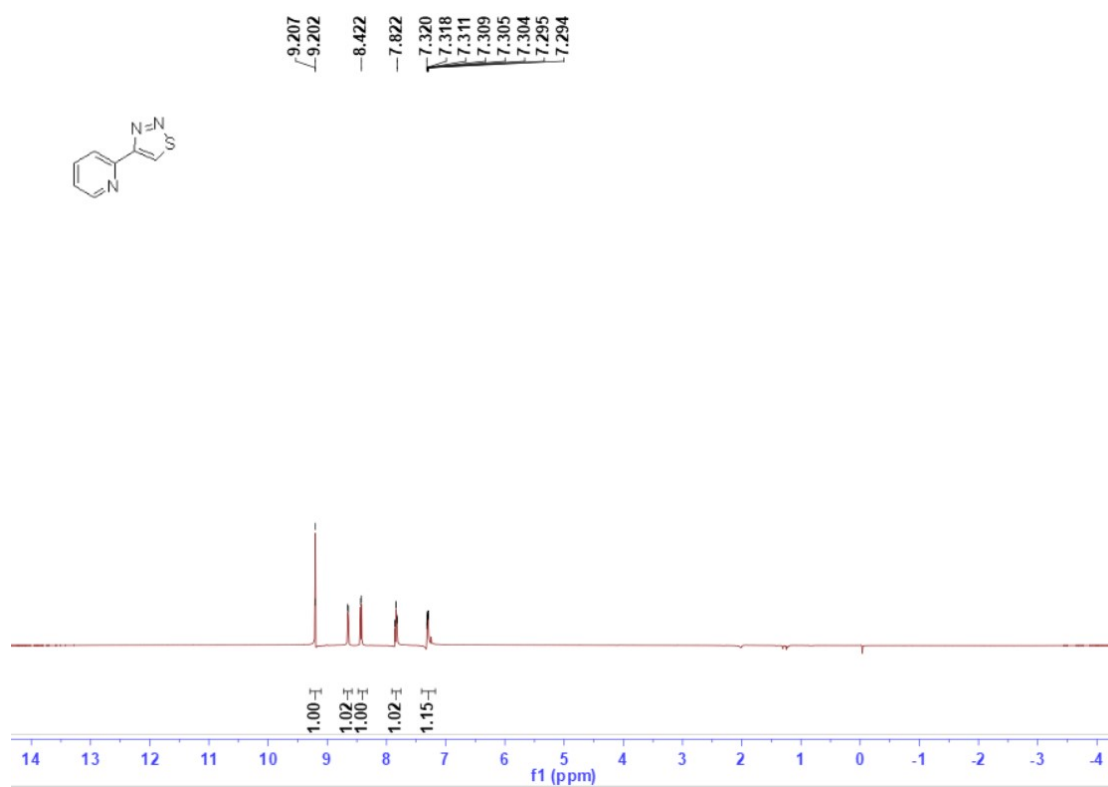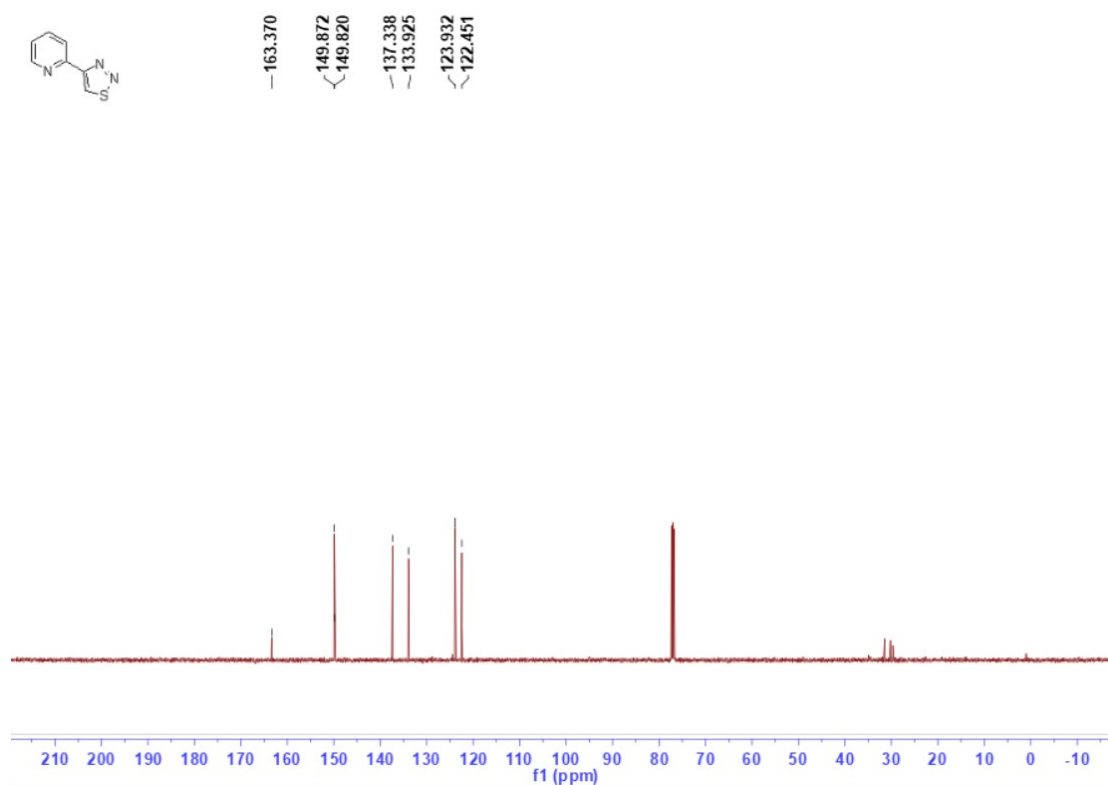

### 4-(6-methoxypyridin-3-yl)-1,2,3-thiadiazole (1ex)

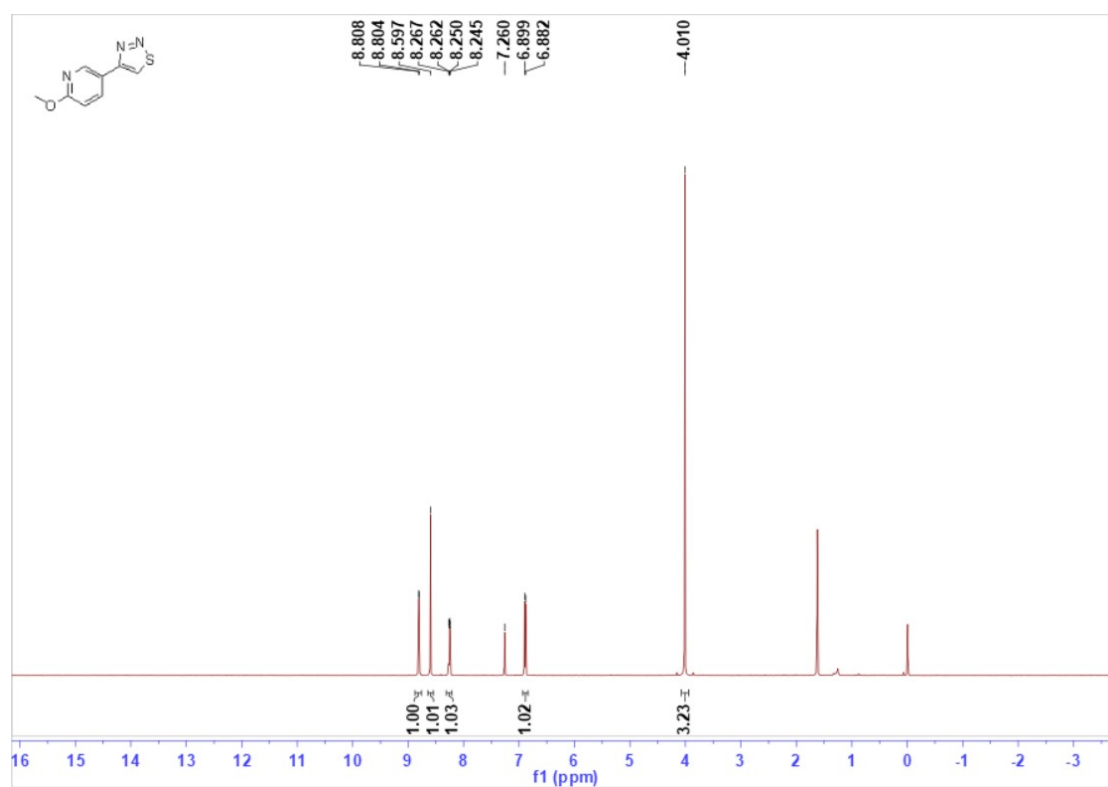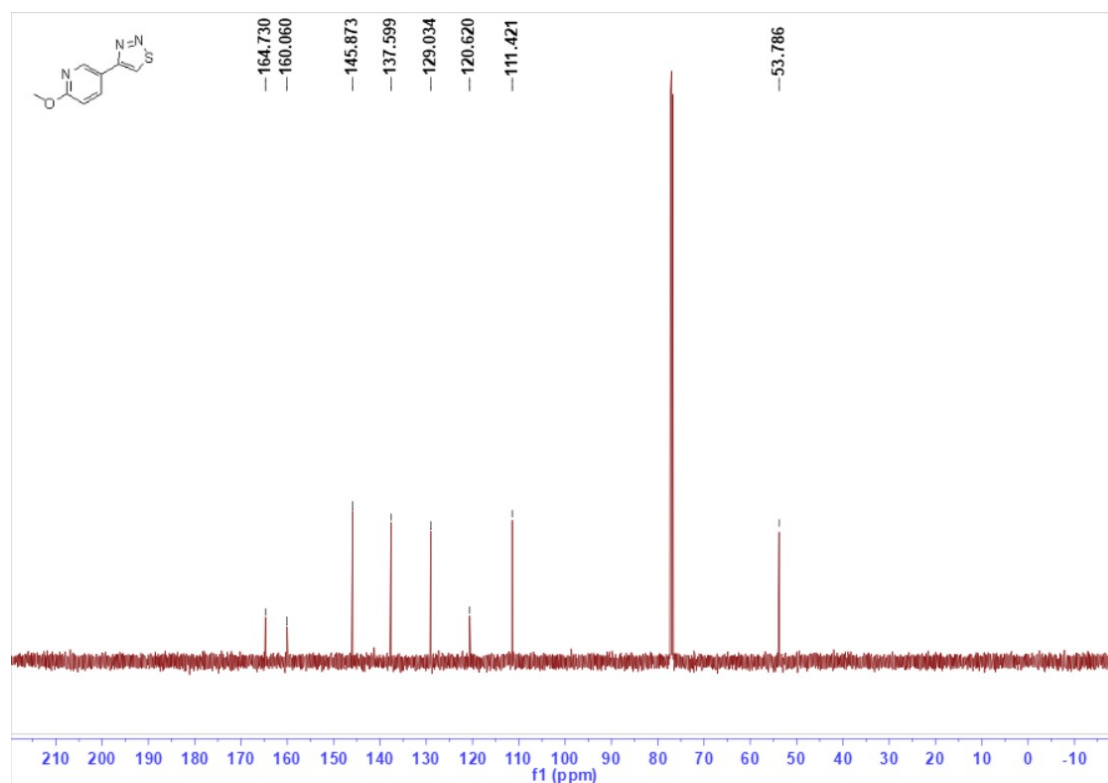

### 4-(5-bromopyridin-3-yl)-1,2,3-thiadiazole (1ey)

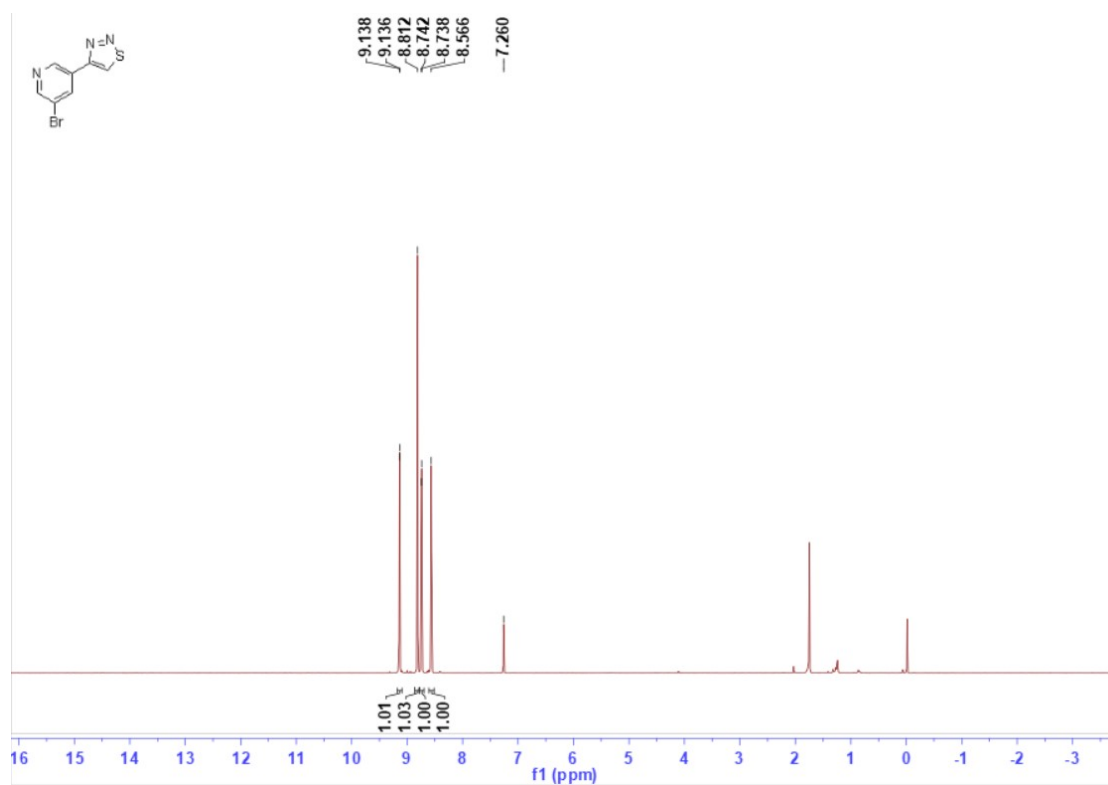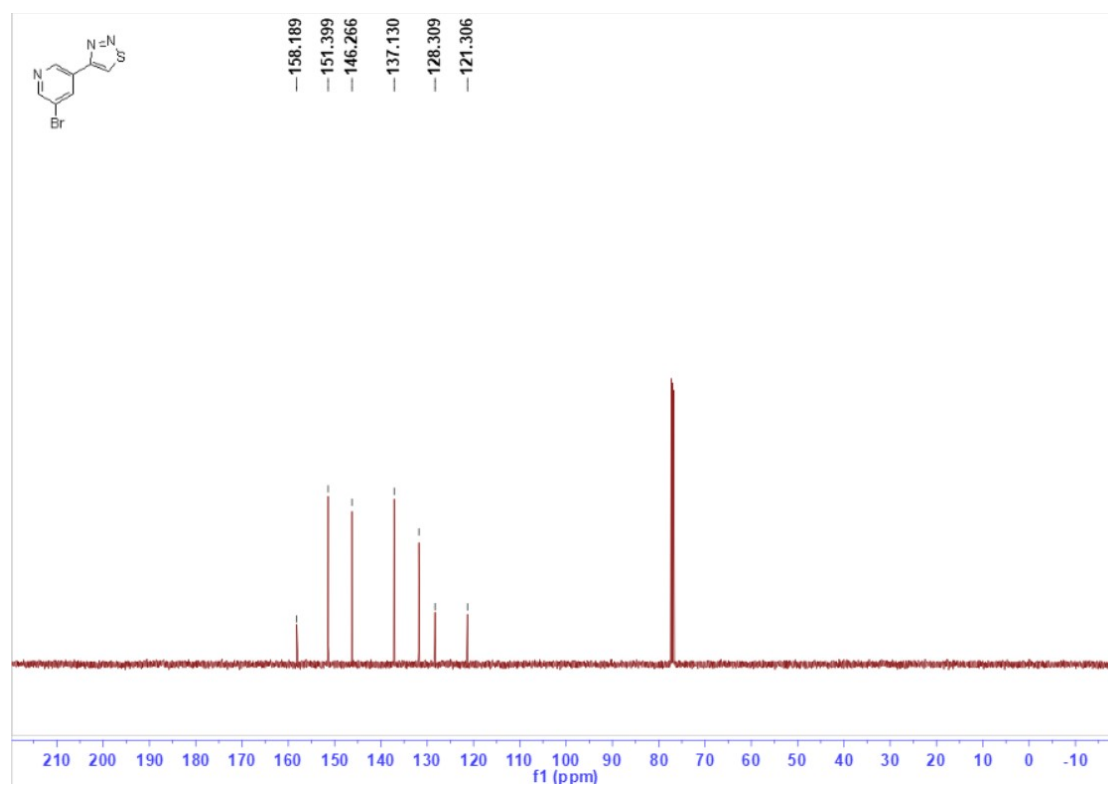

# 4-(pyridin-4-yl)-1,2,3-thiadiazole (1ez)

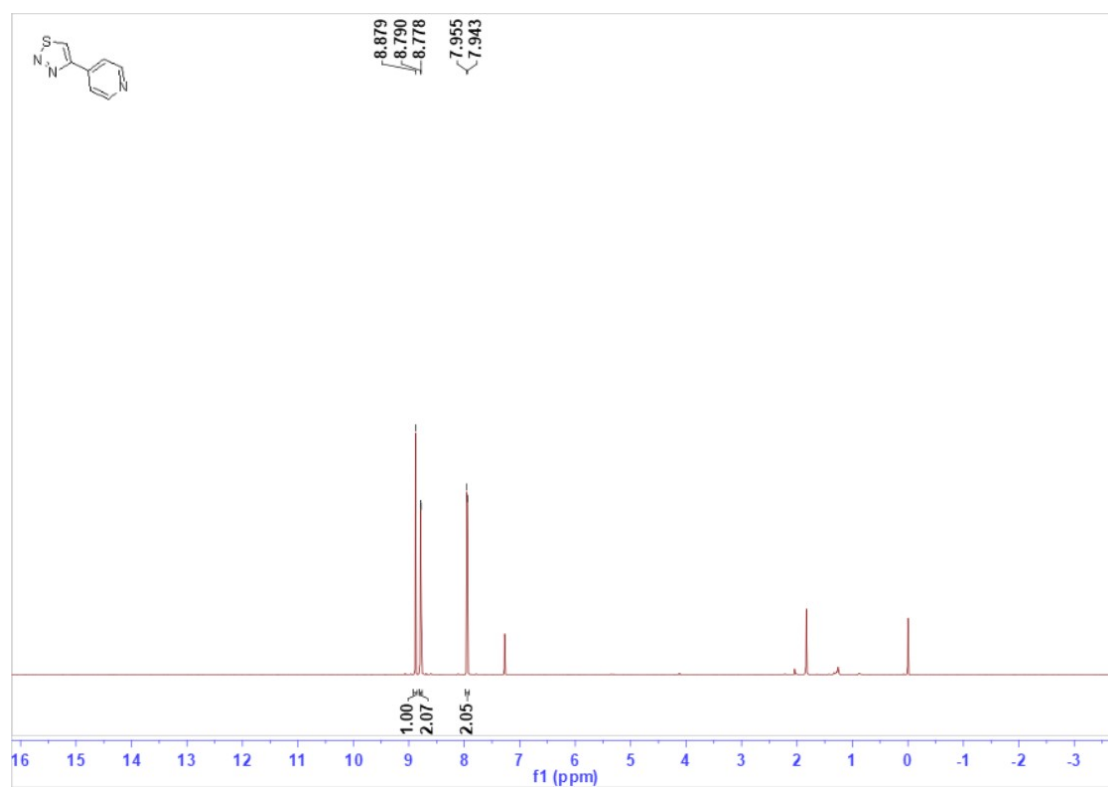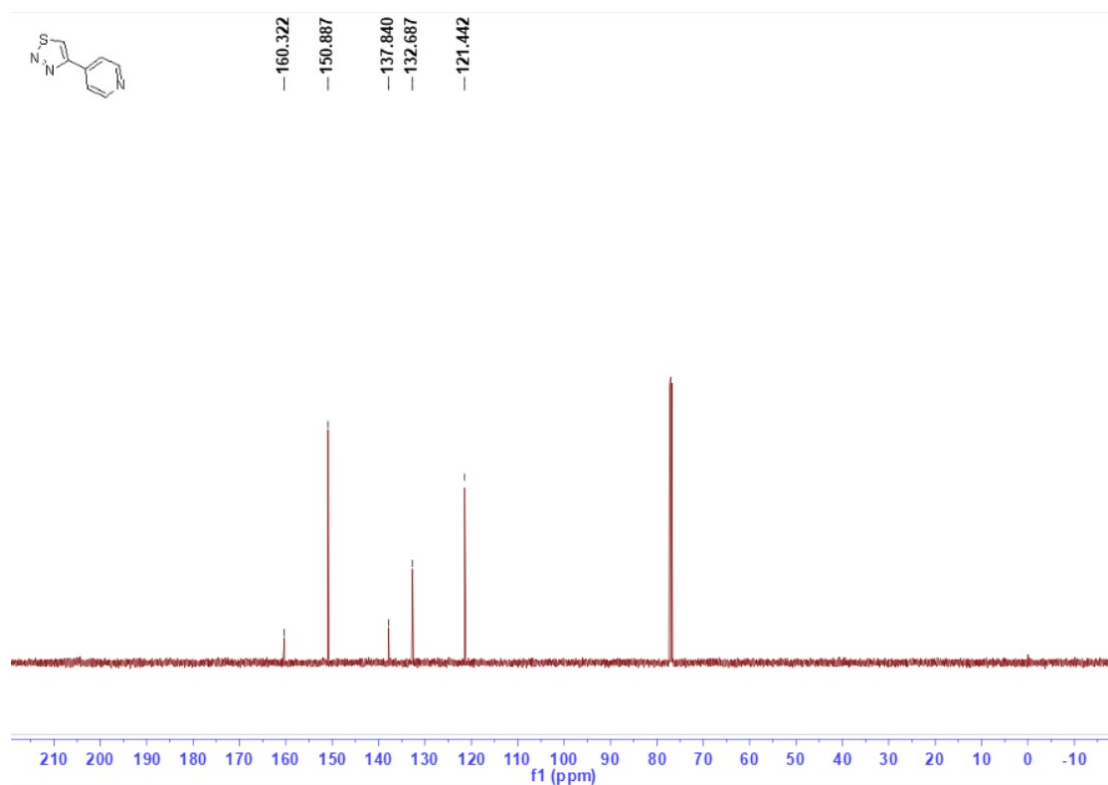

### 4-(3-methylpyrazin-2-yl)-1,2,3-thiadiazole (1eza)

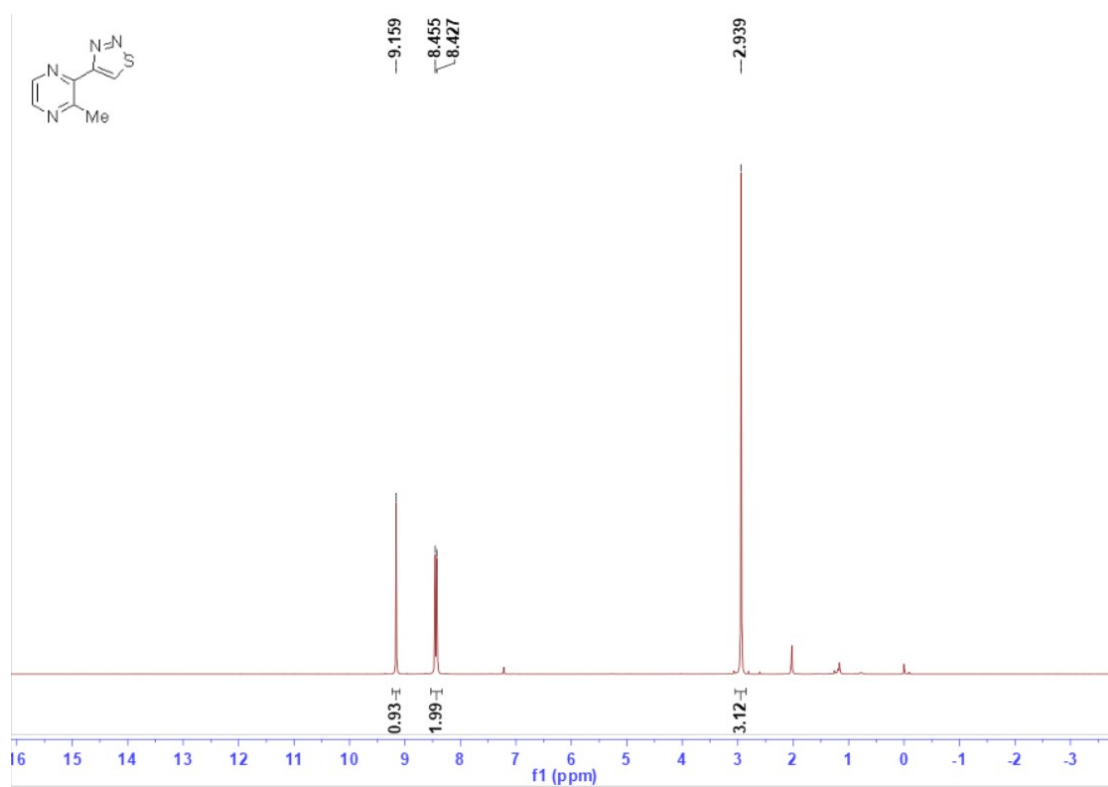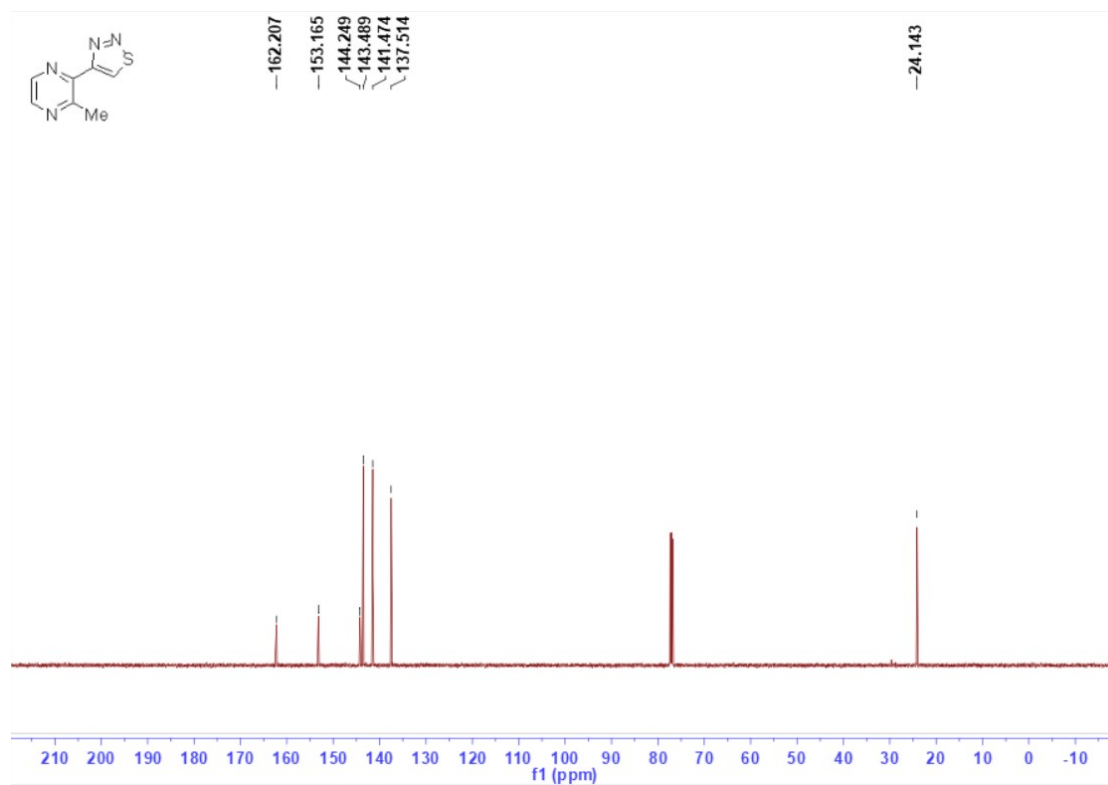

# 4-(1*H*-pyrrolo[2,3-*b*]pyridin-3-yl)-1,2,3-thiadiazole (1ezb)

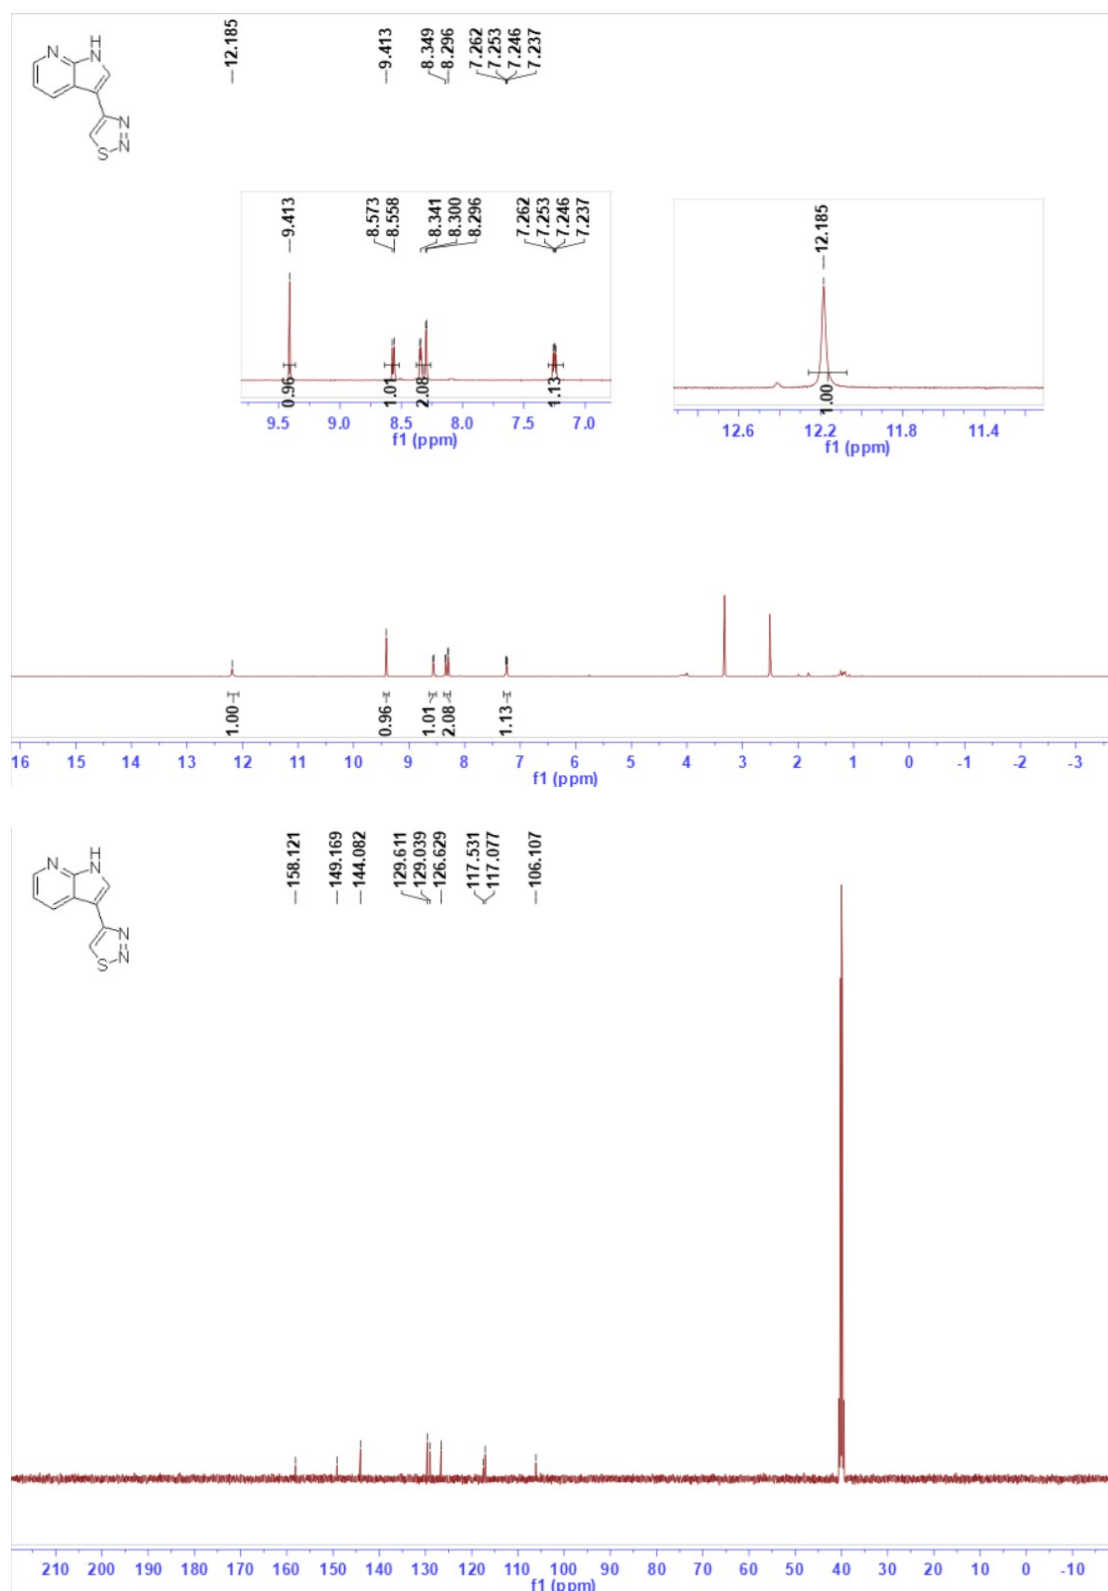

# 4-Phenyl-1,2,3-thiadiazole-5-d (1a-d)

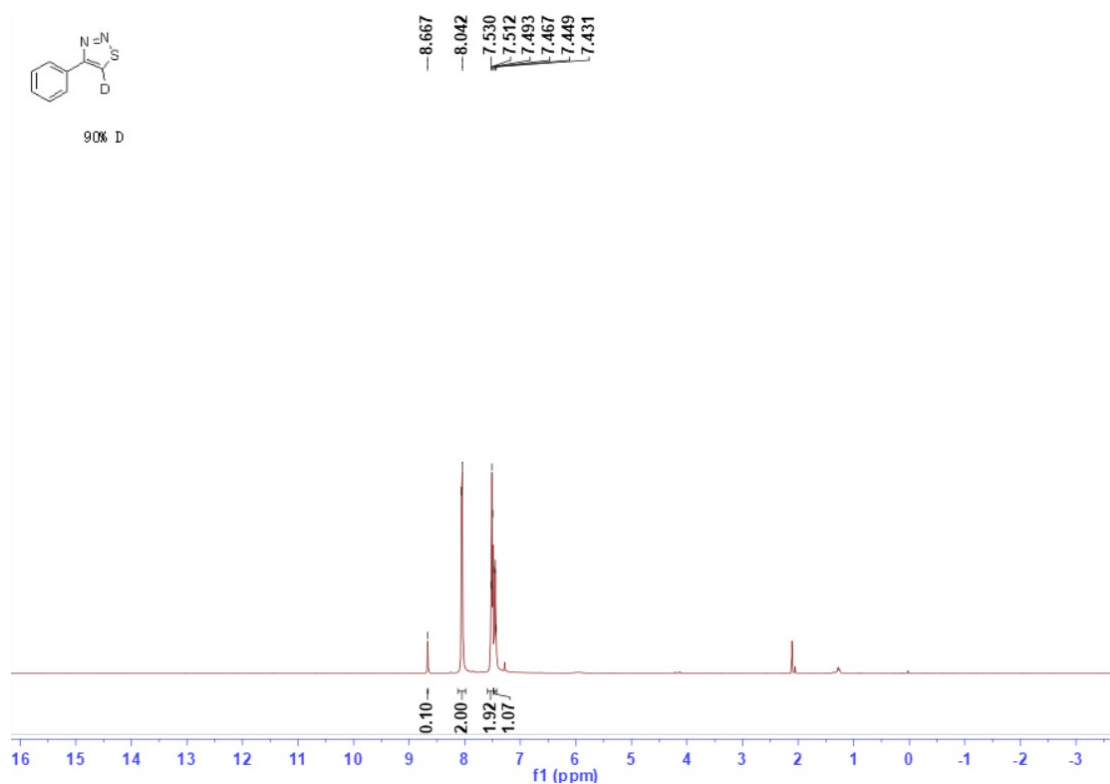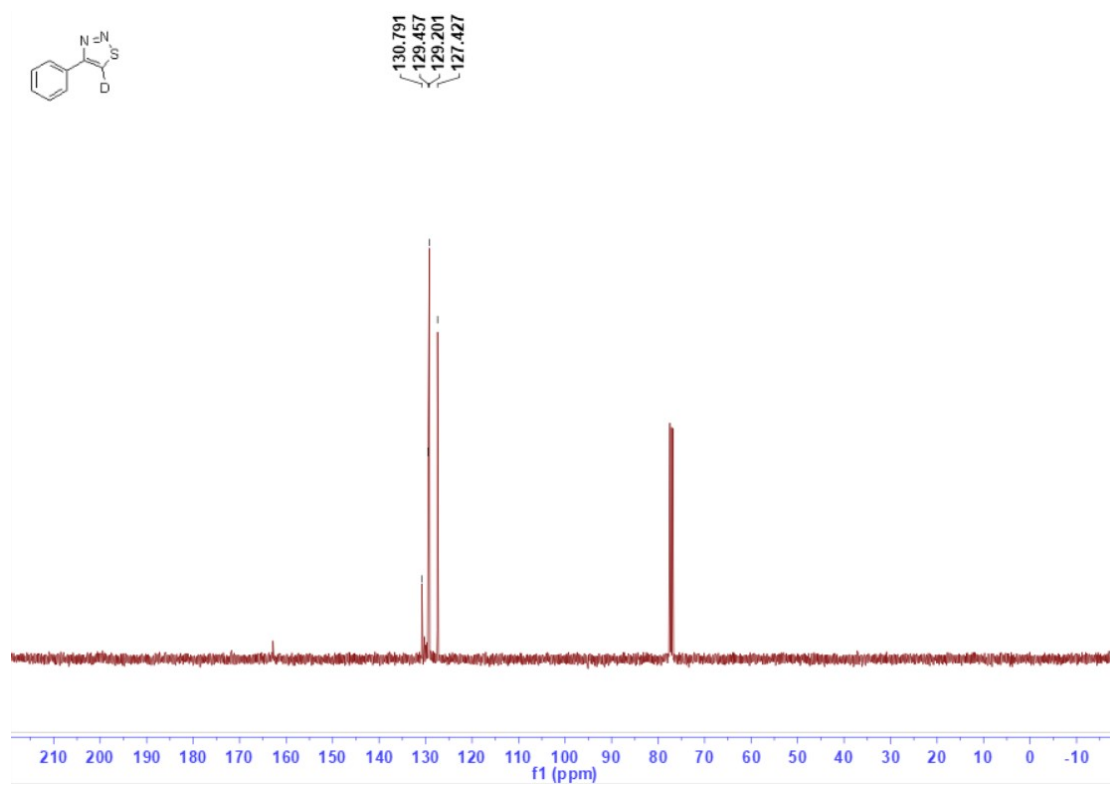

### *N*,2-diphenylethanethioamide (3aa)

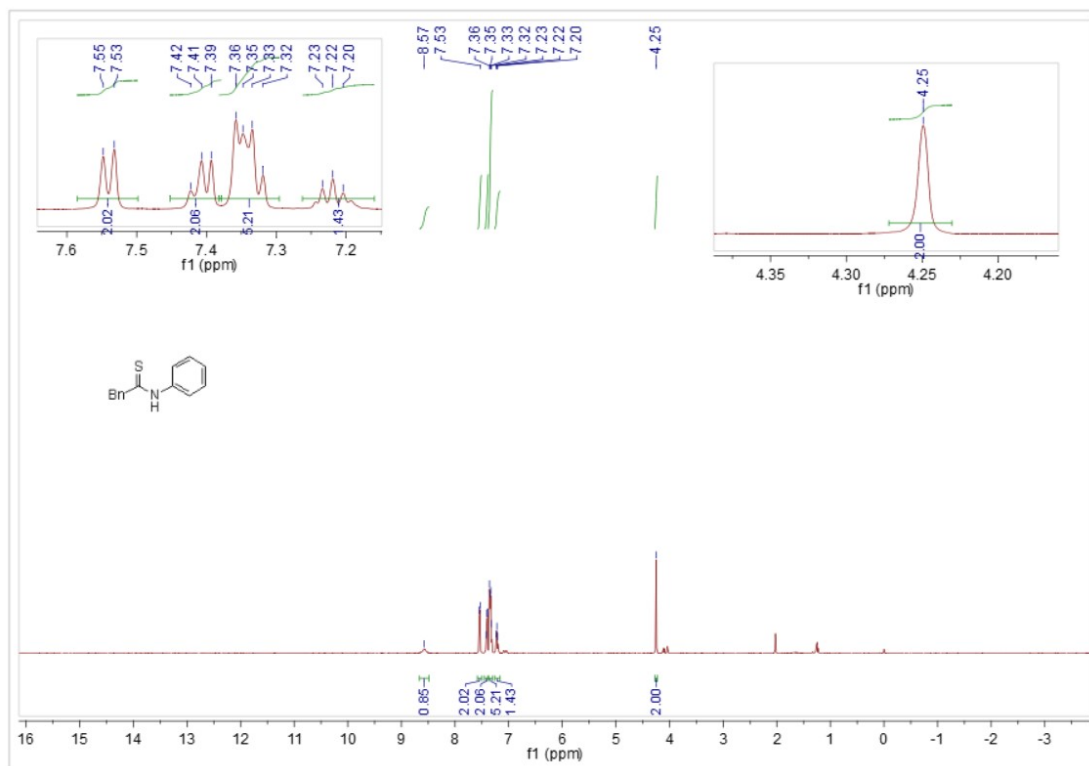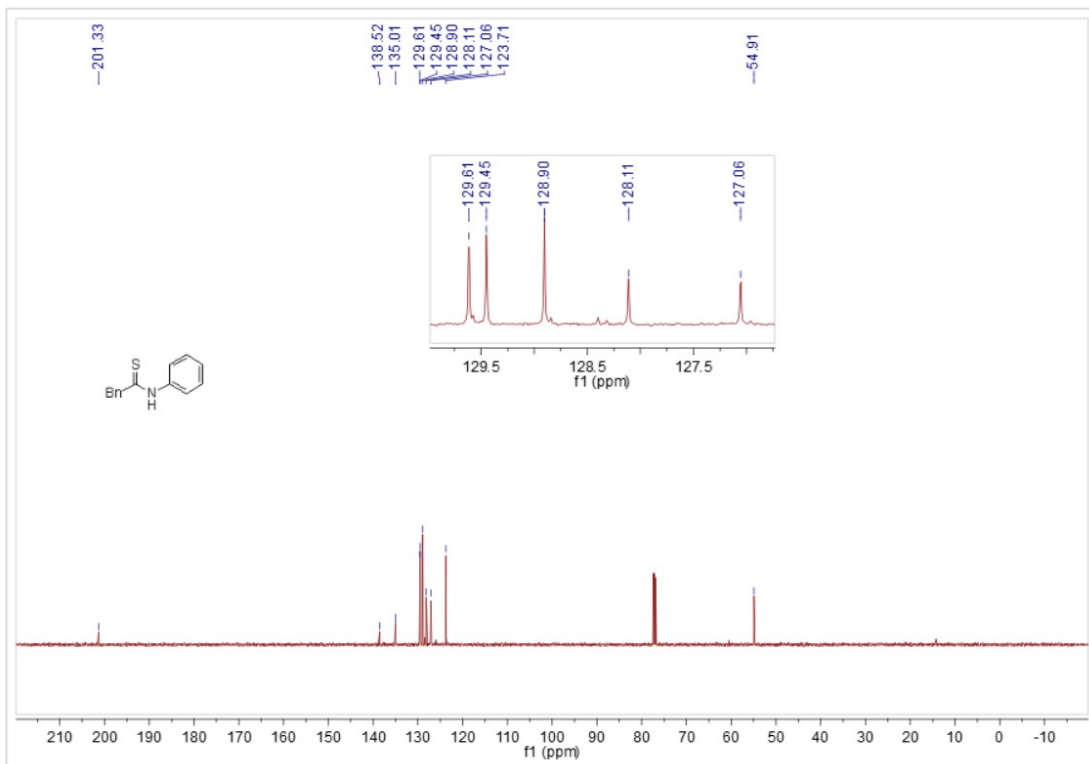



### *N*-(2-methoxyphenyl)-2-phenylethanethioamide (3ab)

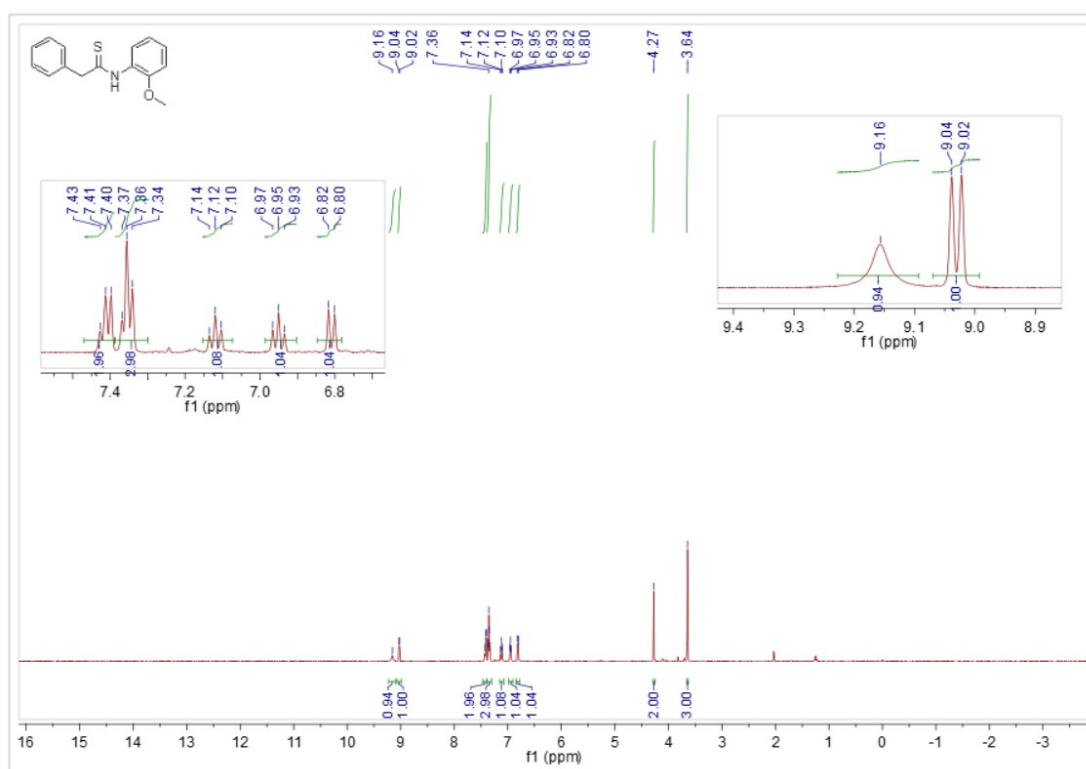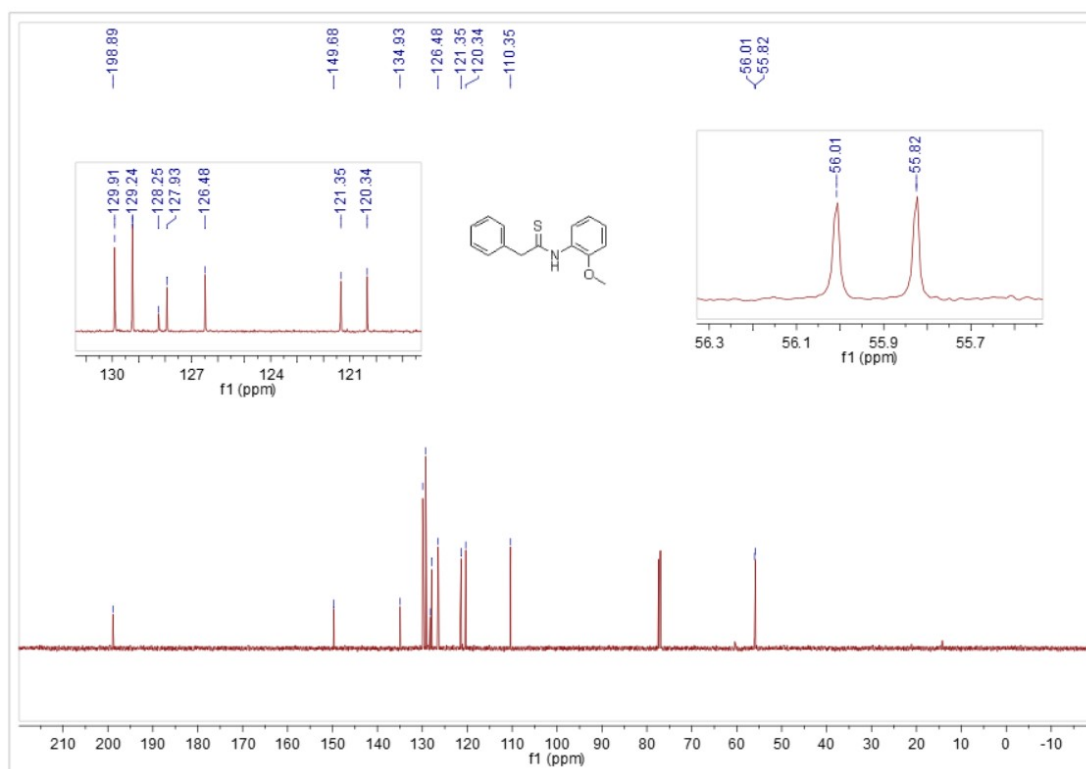

### *N*-(3-ethynylphenyl)-2-phenylethanethioamide (3ac)

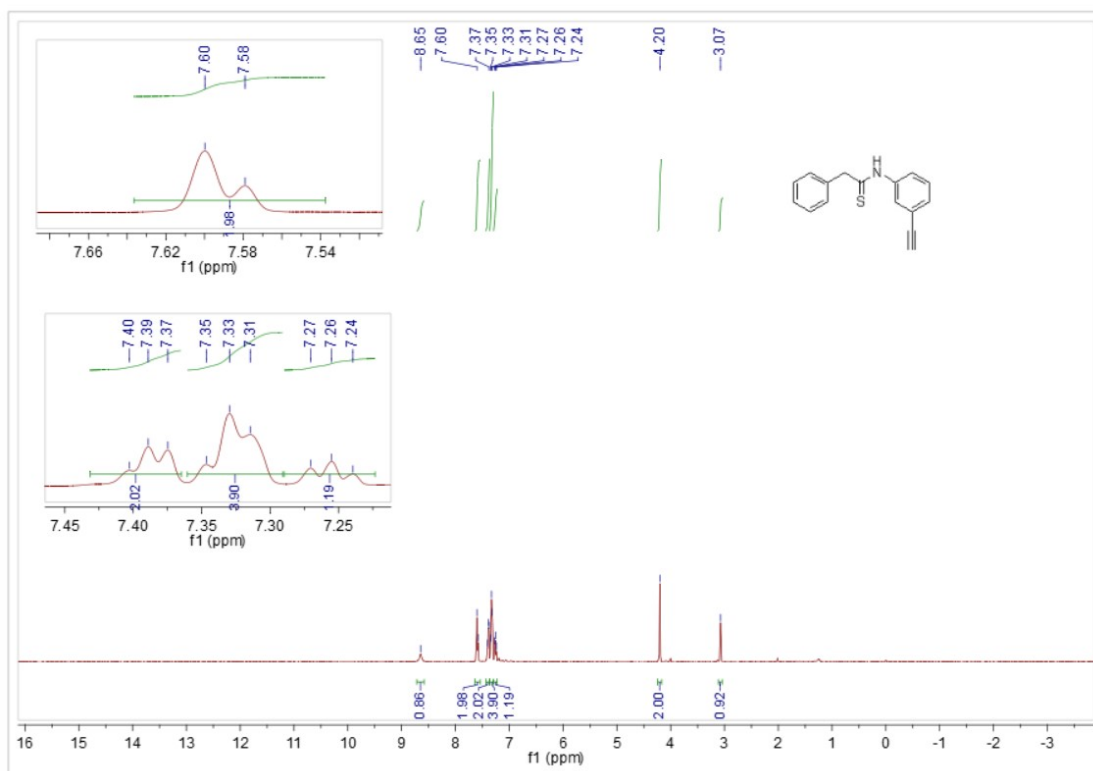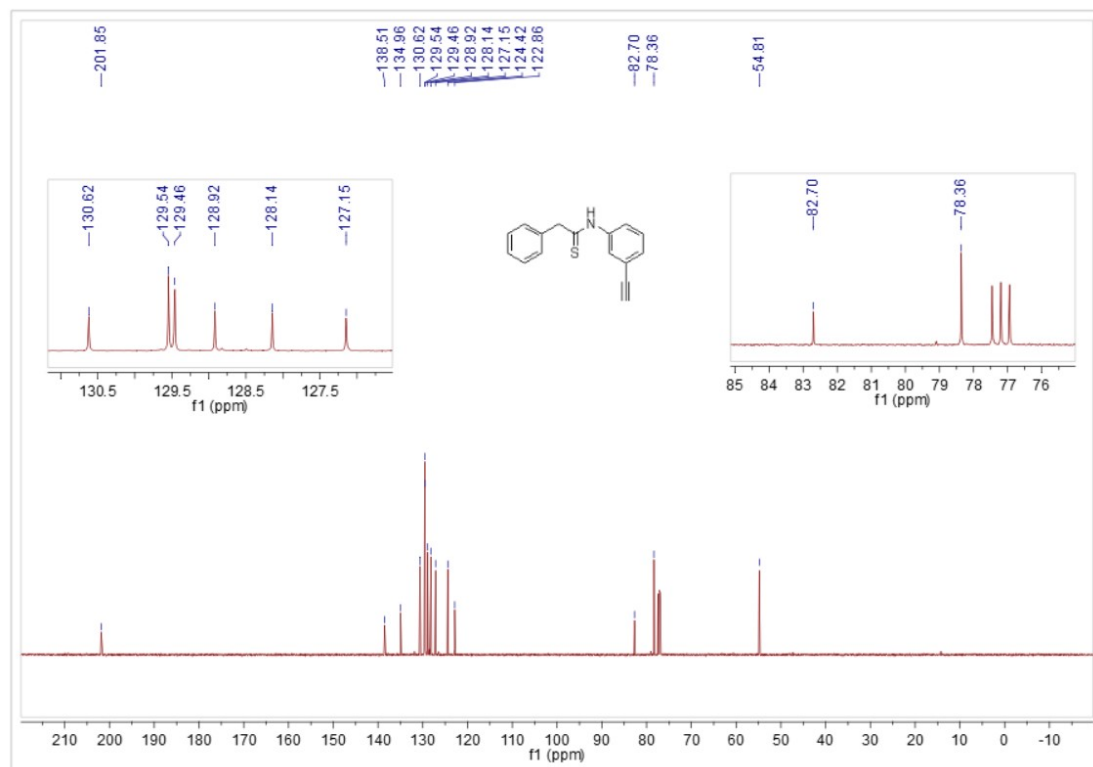

***N*-(2-fluorophenyl)-2-phenylethanethioamide (3ad)**

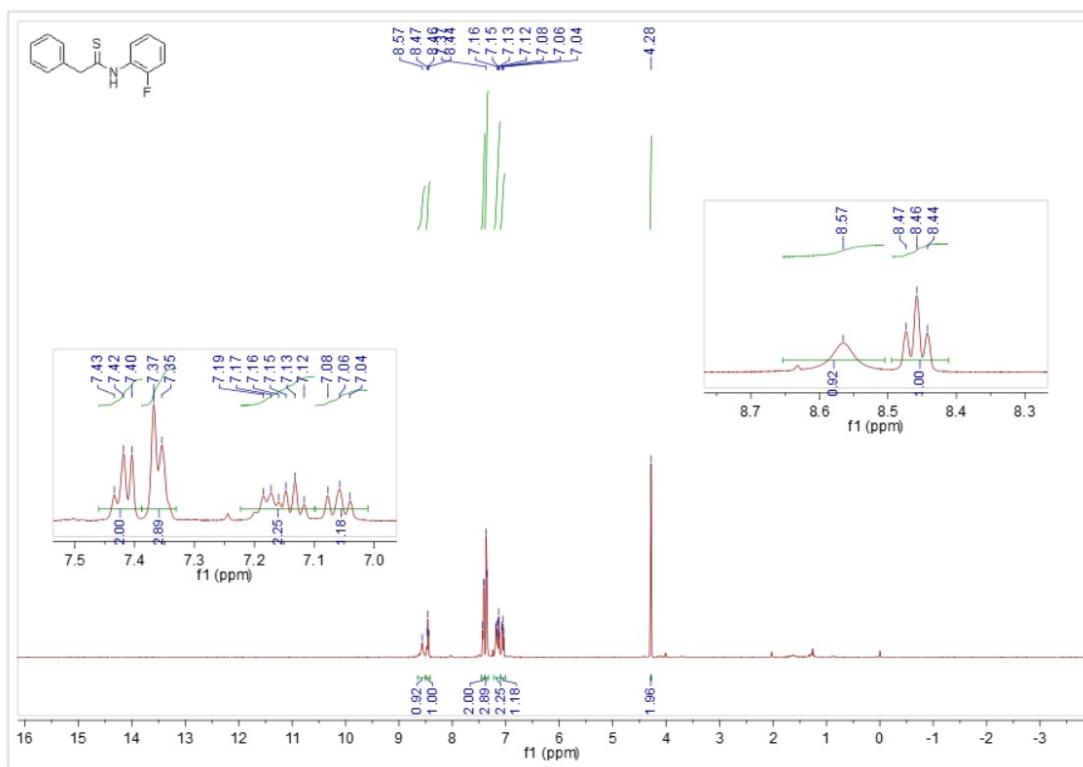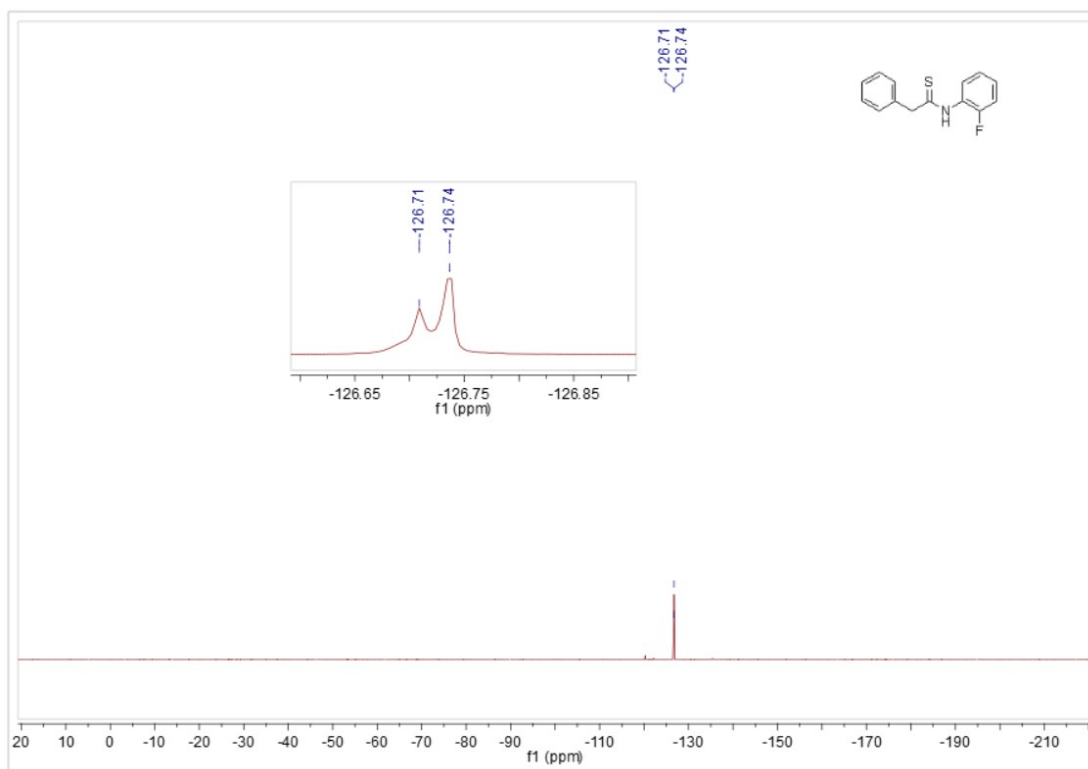

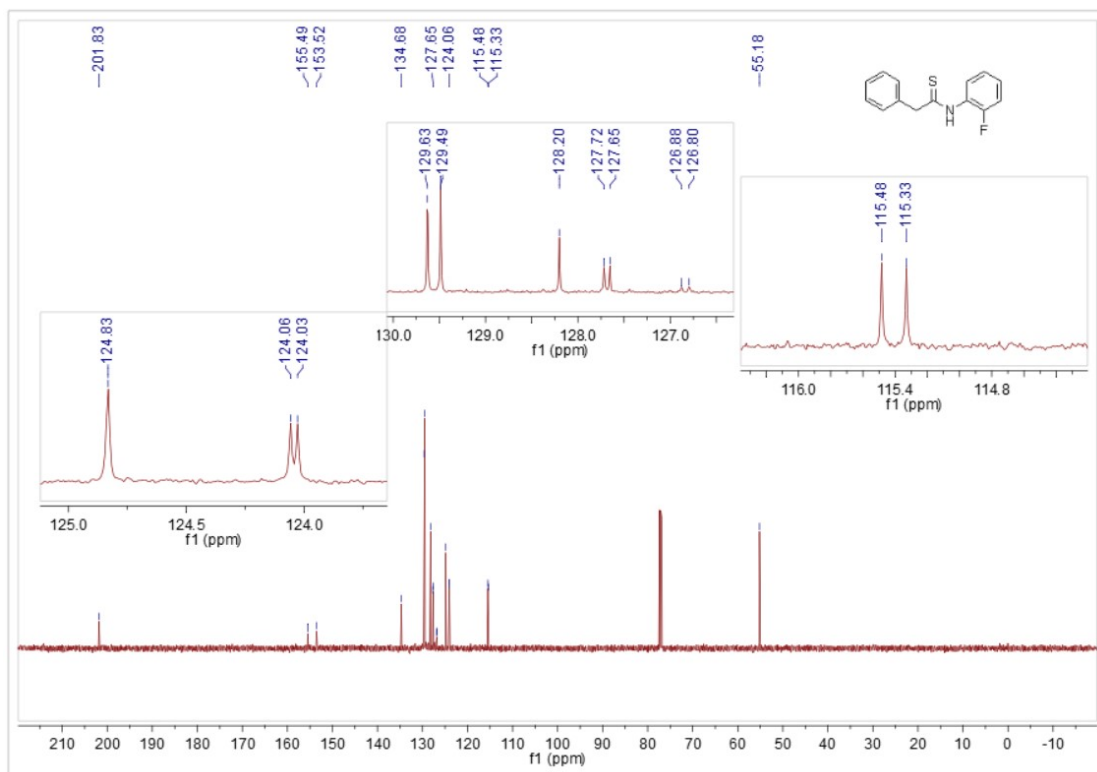

***N*-(4-acetylphenyl)-2-phenylethanethioamide (3ae)**

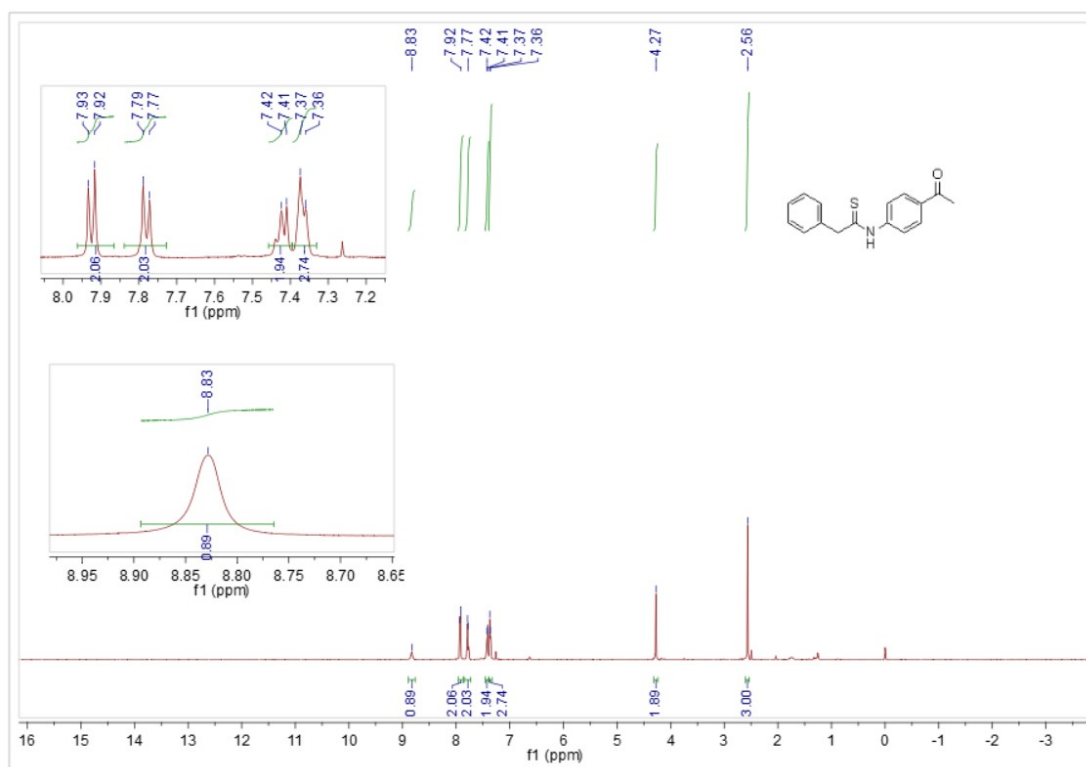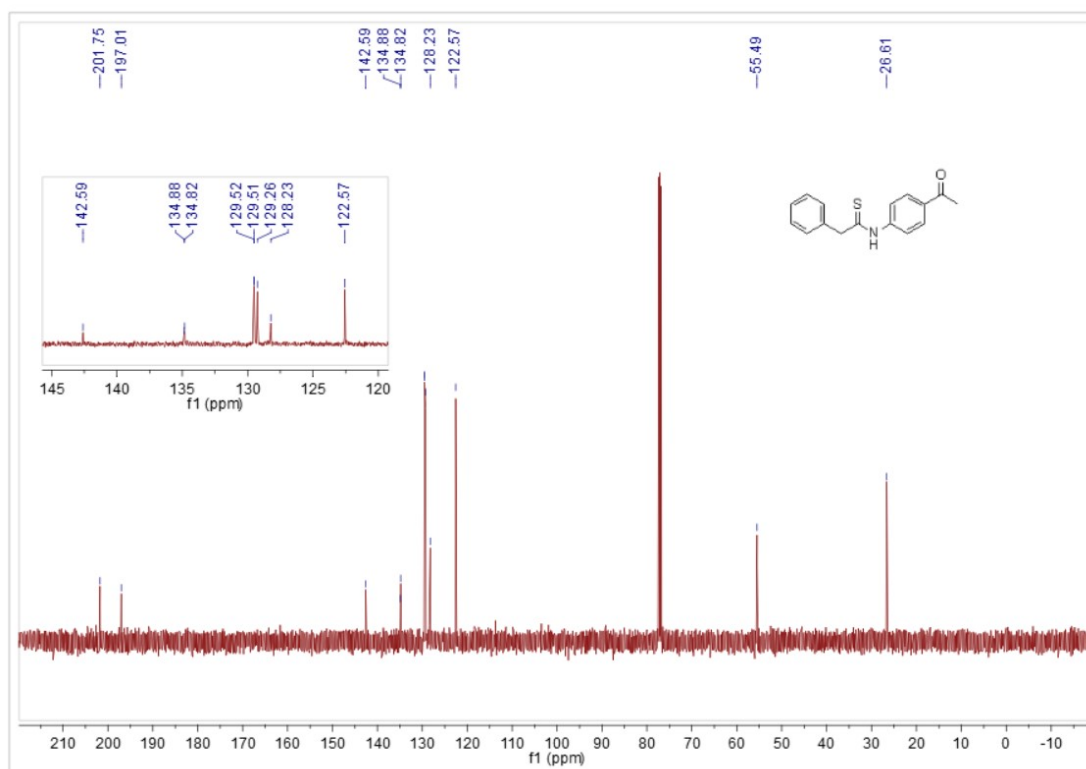

## 2-Phenyl-N-(4-(trifluoromethyl)phenyl)ethanethioamide (3af)

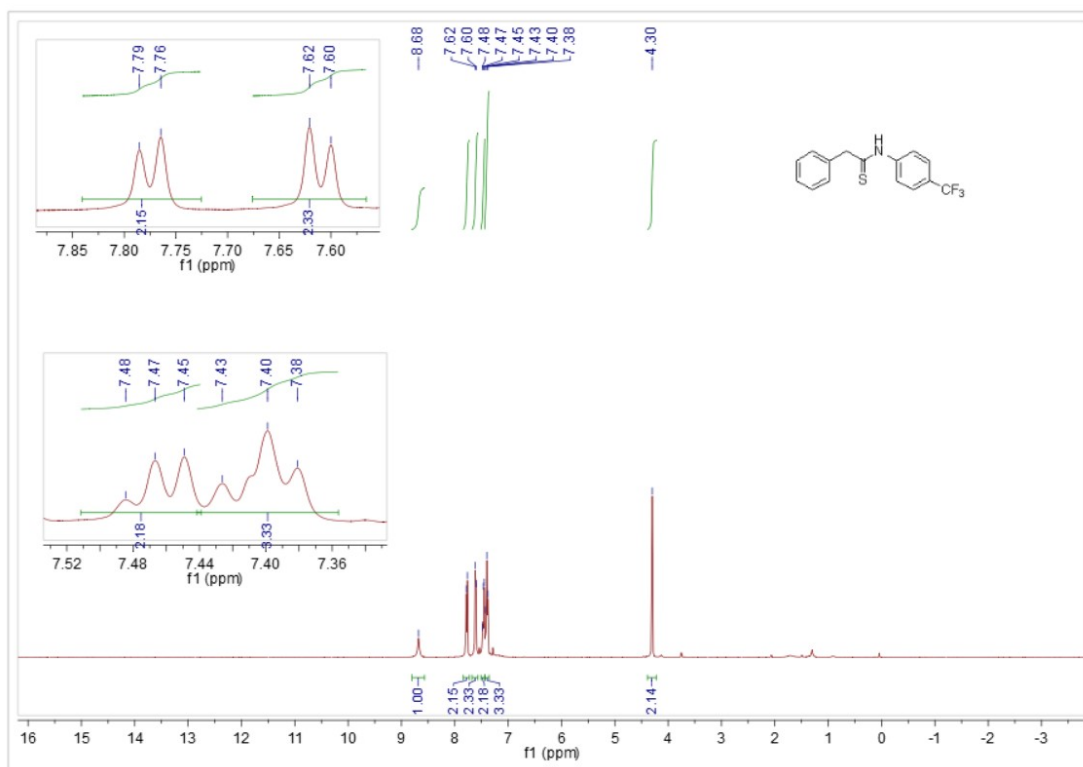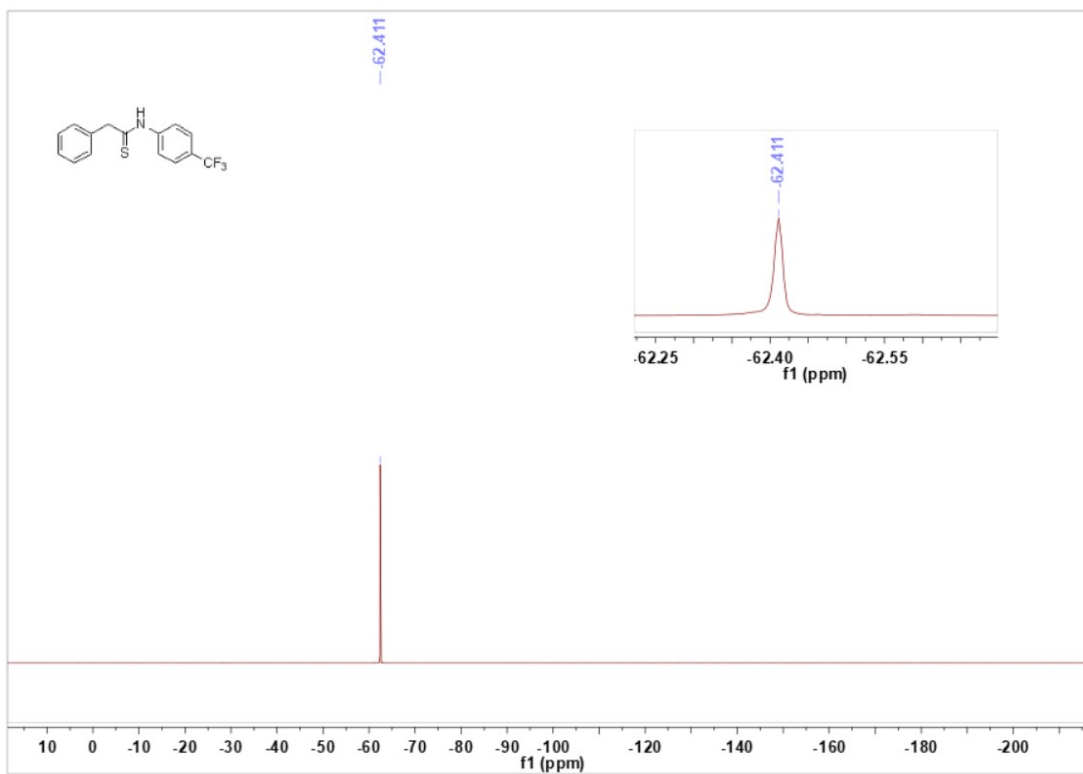

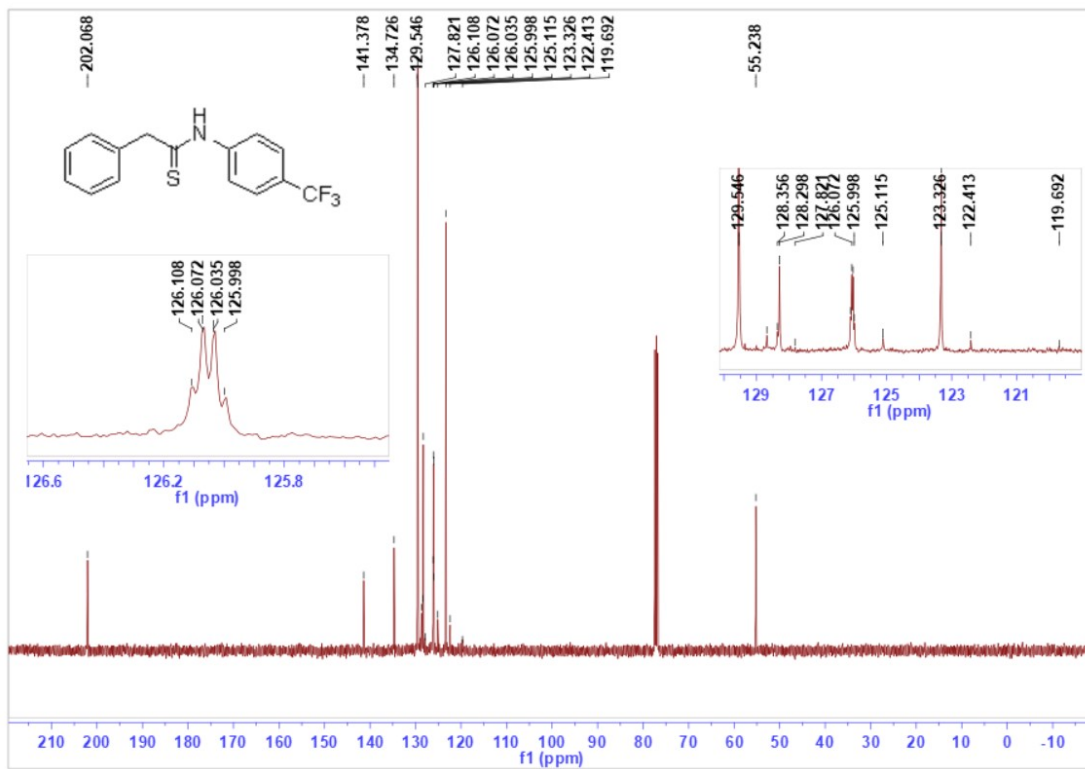

***N*-methyl-*N*,2-diphenylethanethioamide (3ag)**

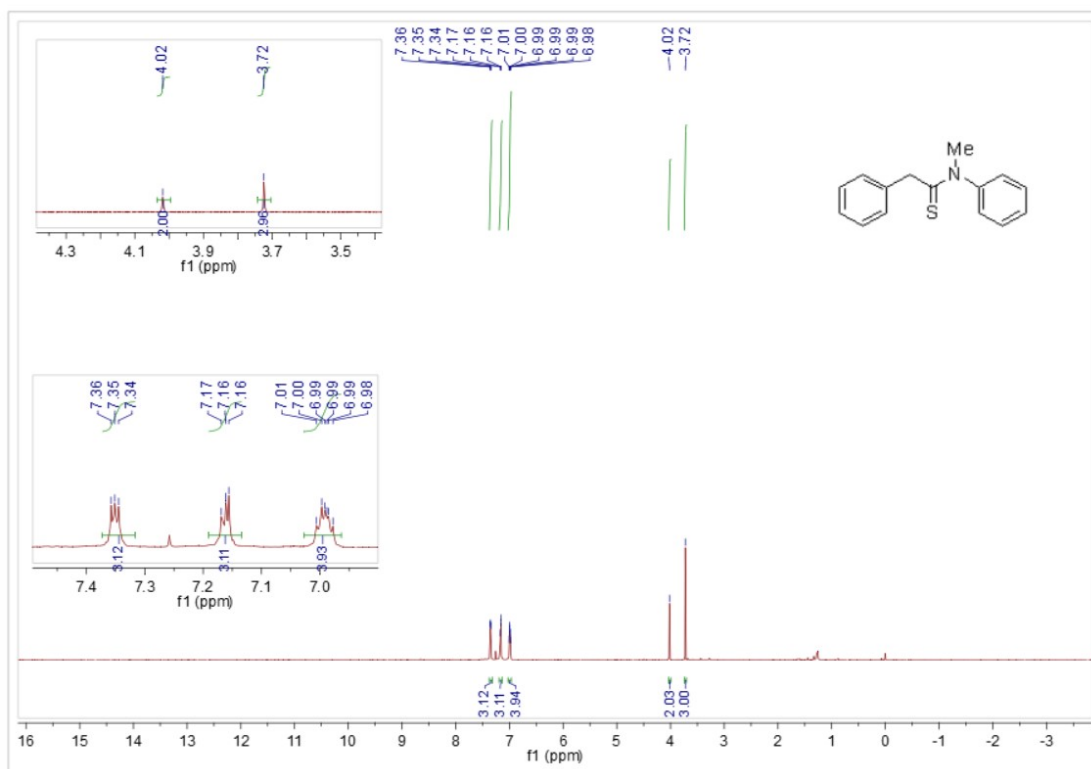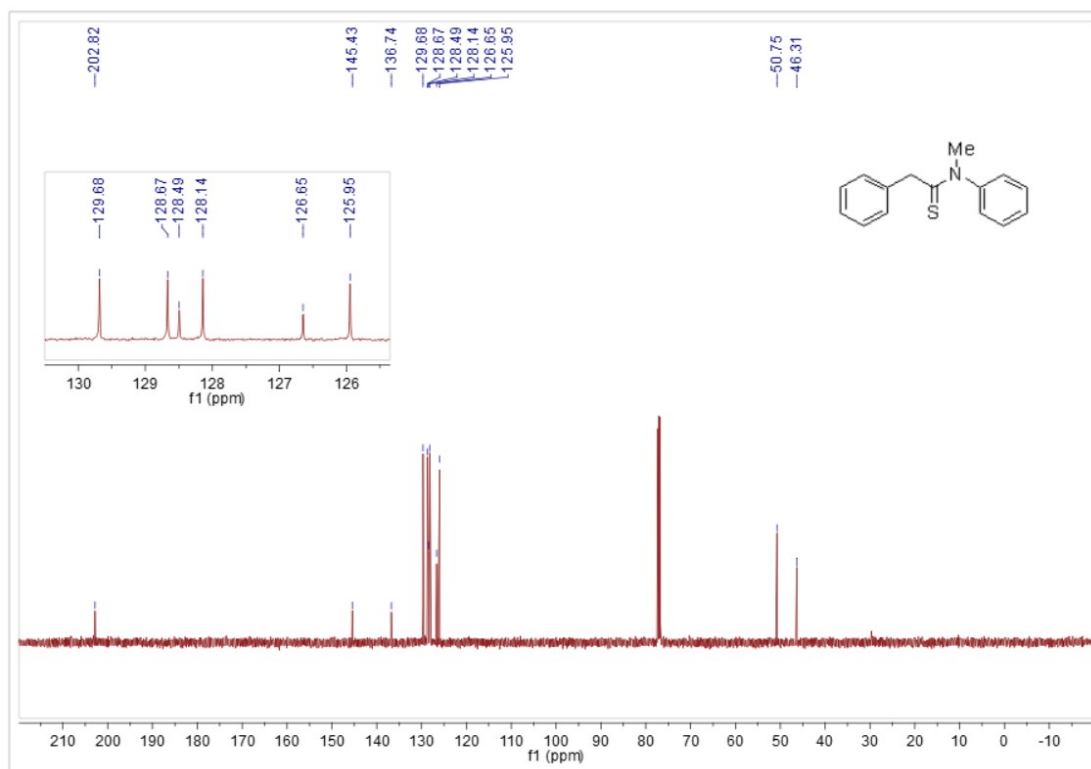



***N*-ethyl-*N*,2-diphenylethanethioamide (3ah)**

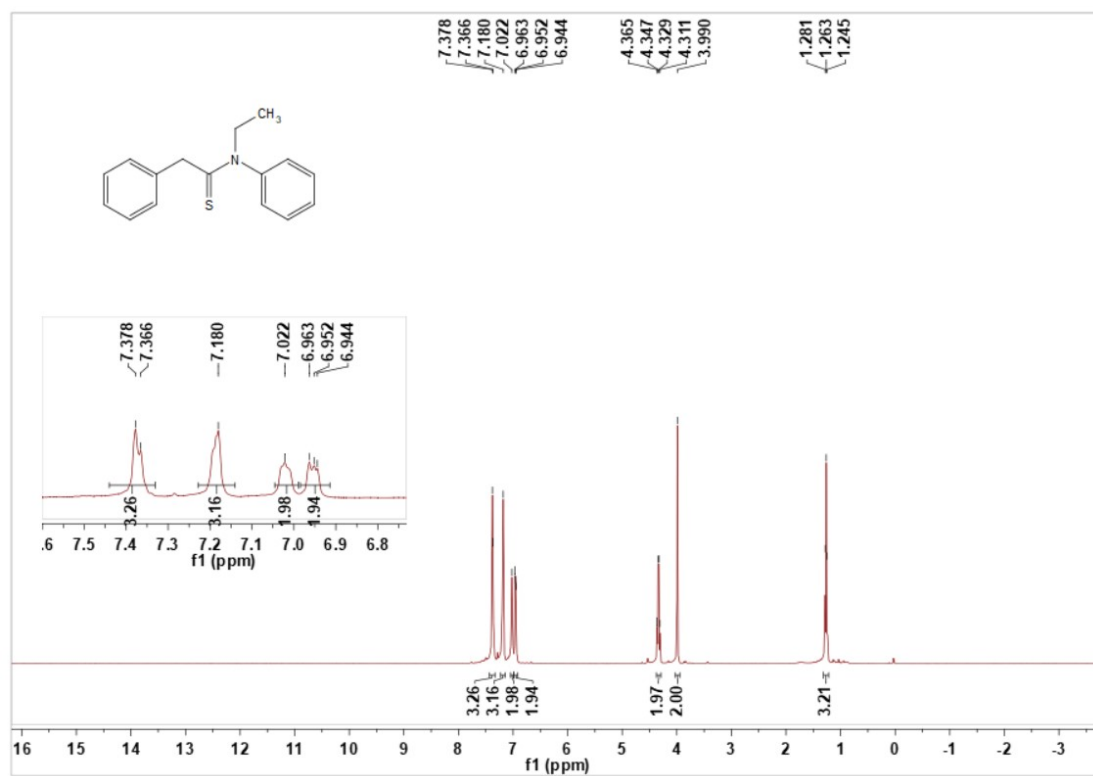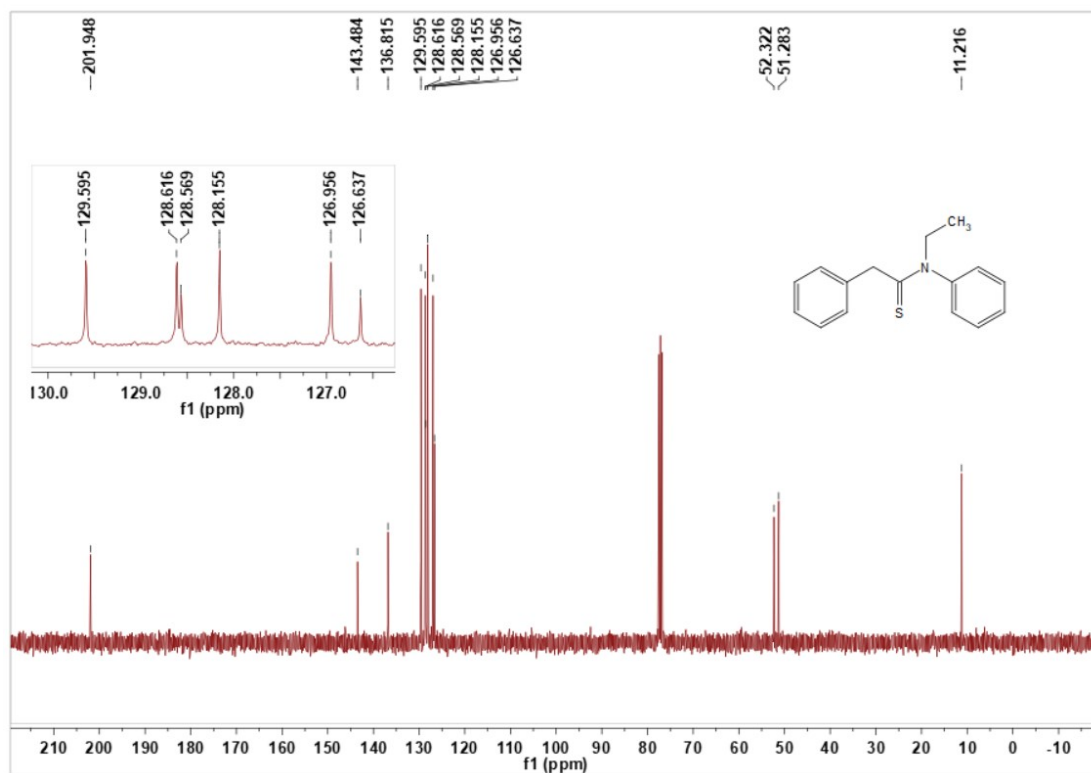

### *N*-isopropyl-*N*,2-diphenylethanethioamide (3ai)

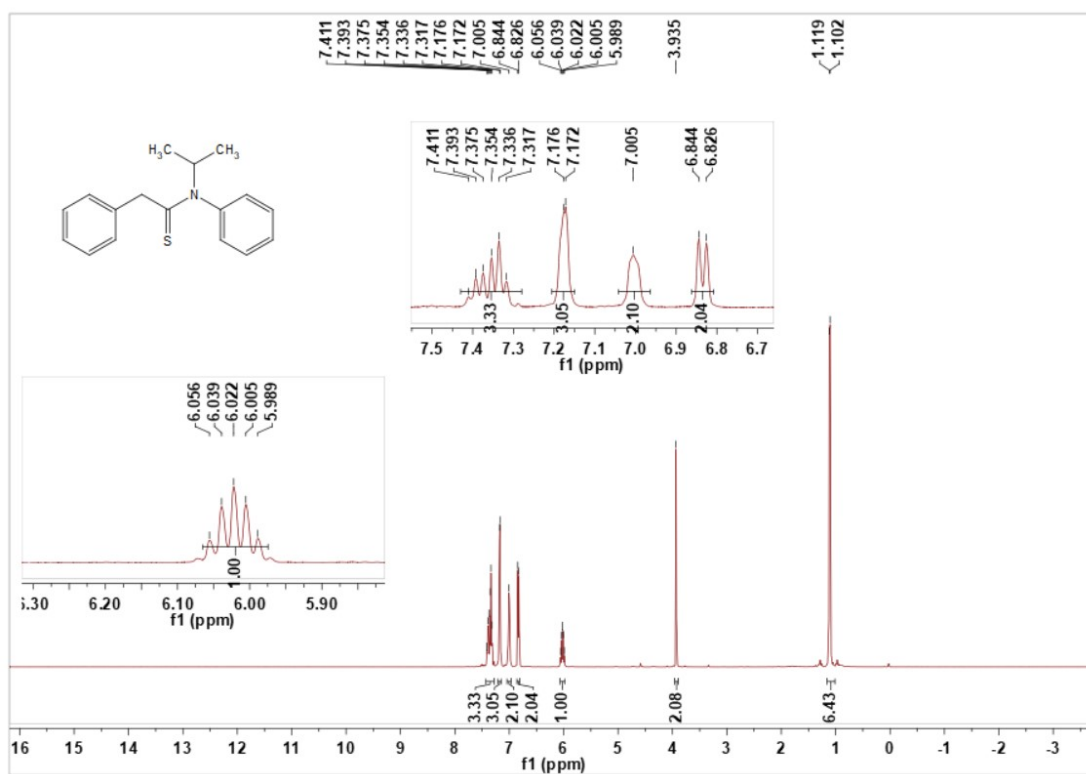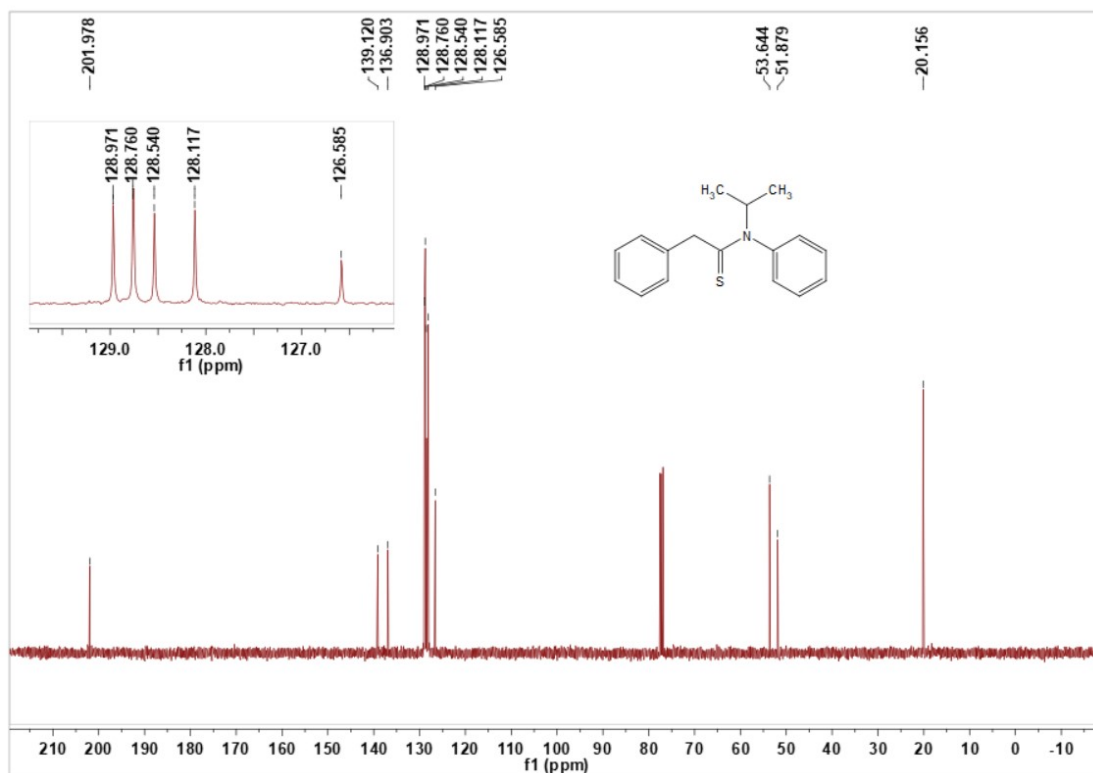

*N*-benzyl-*N*,2-diphenylethanoamide (3aj)

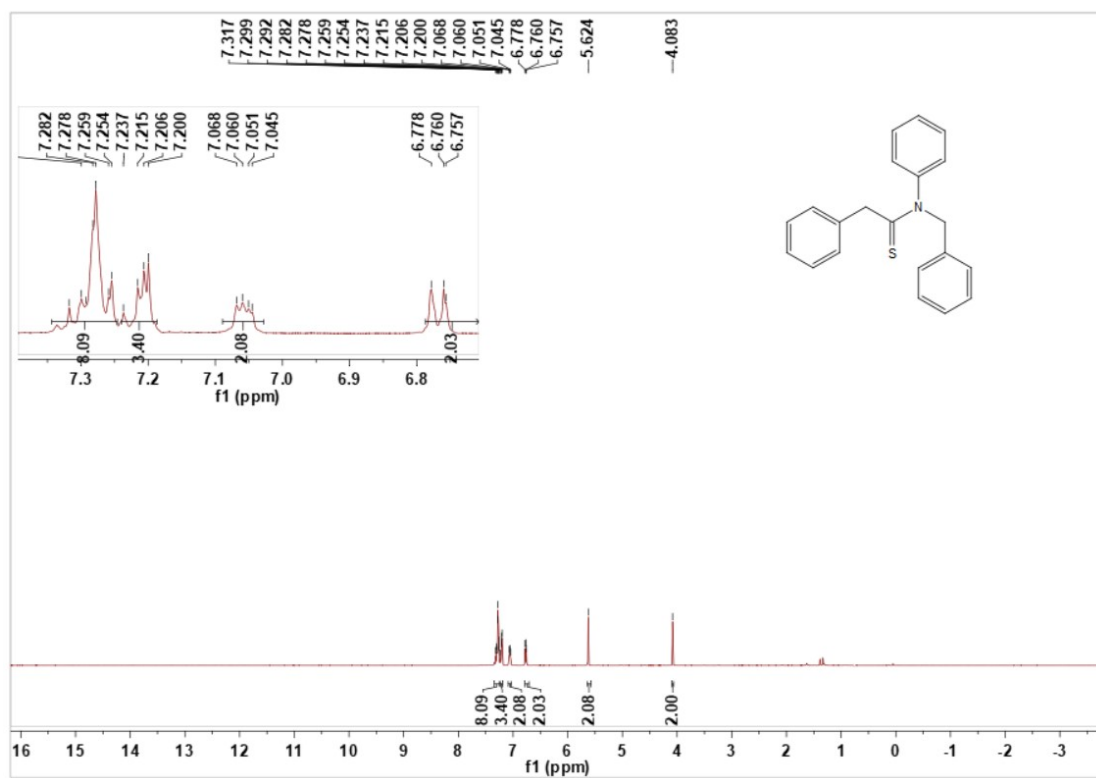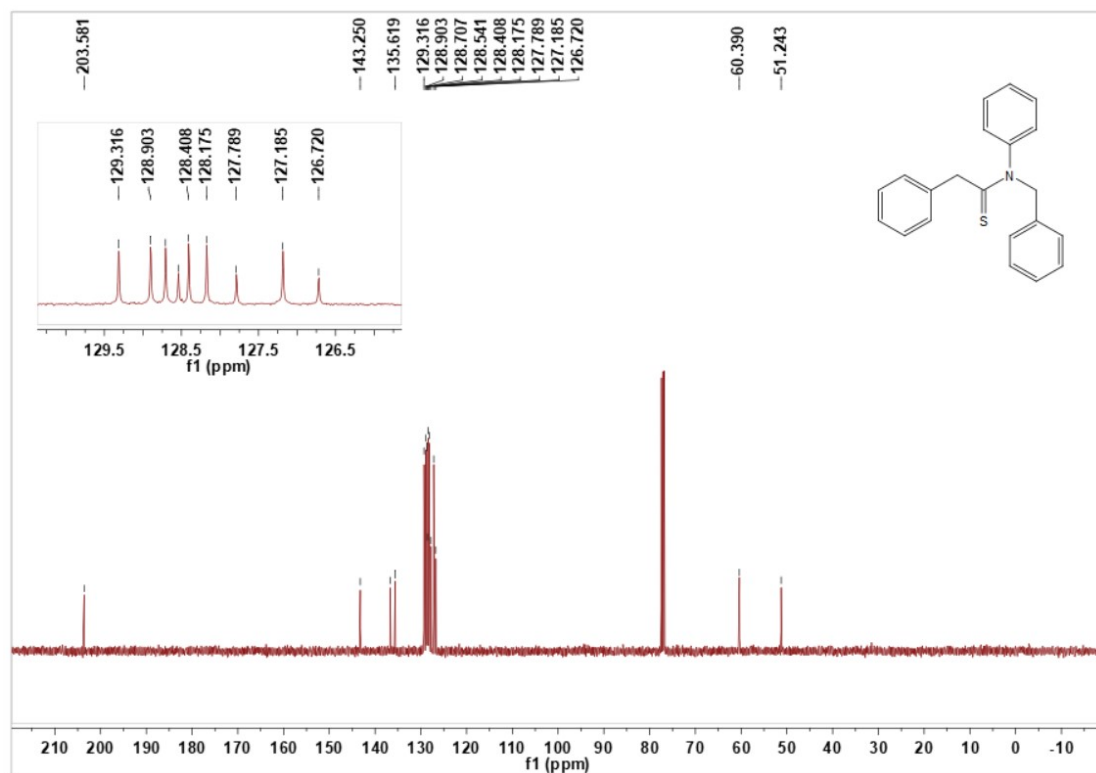

### *N*-(4-chlorophenyl)-*N*-methyl-2-phenylethanethioamide (3ak)

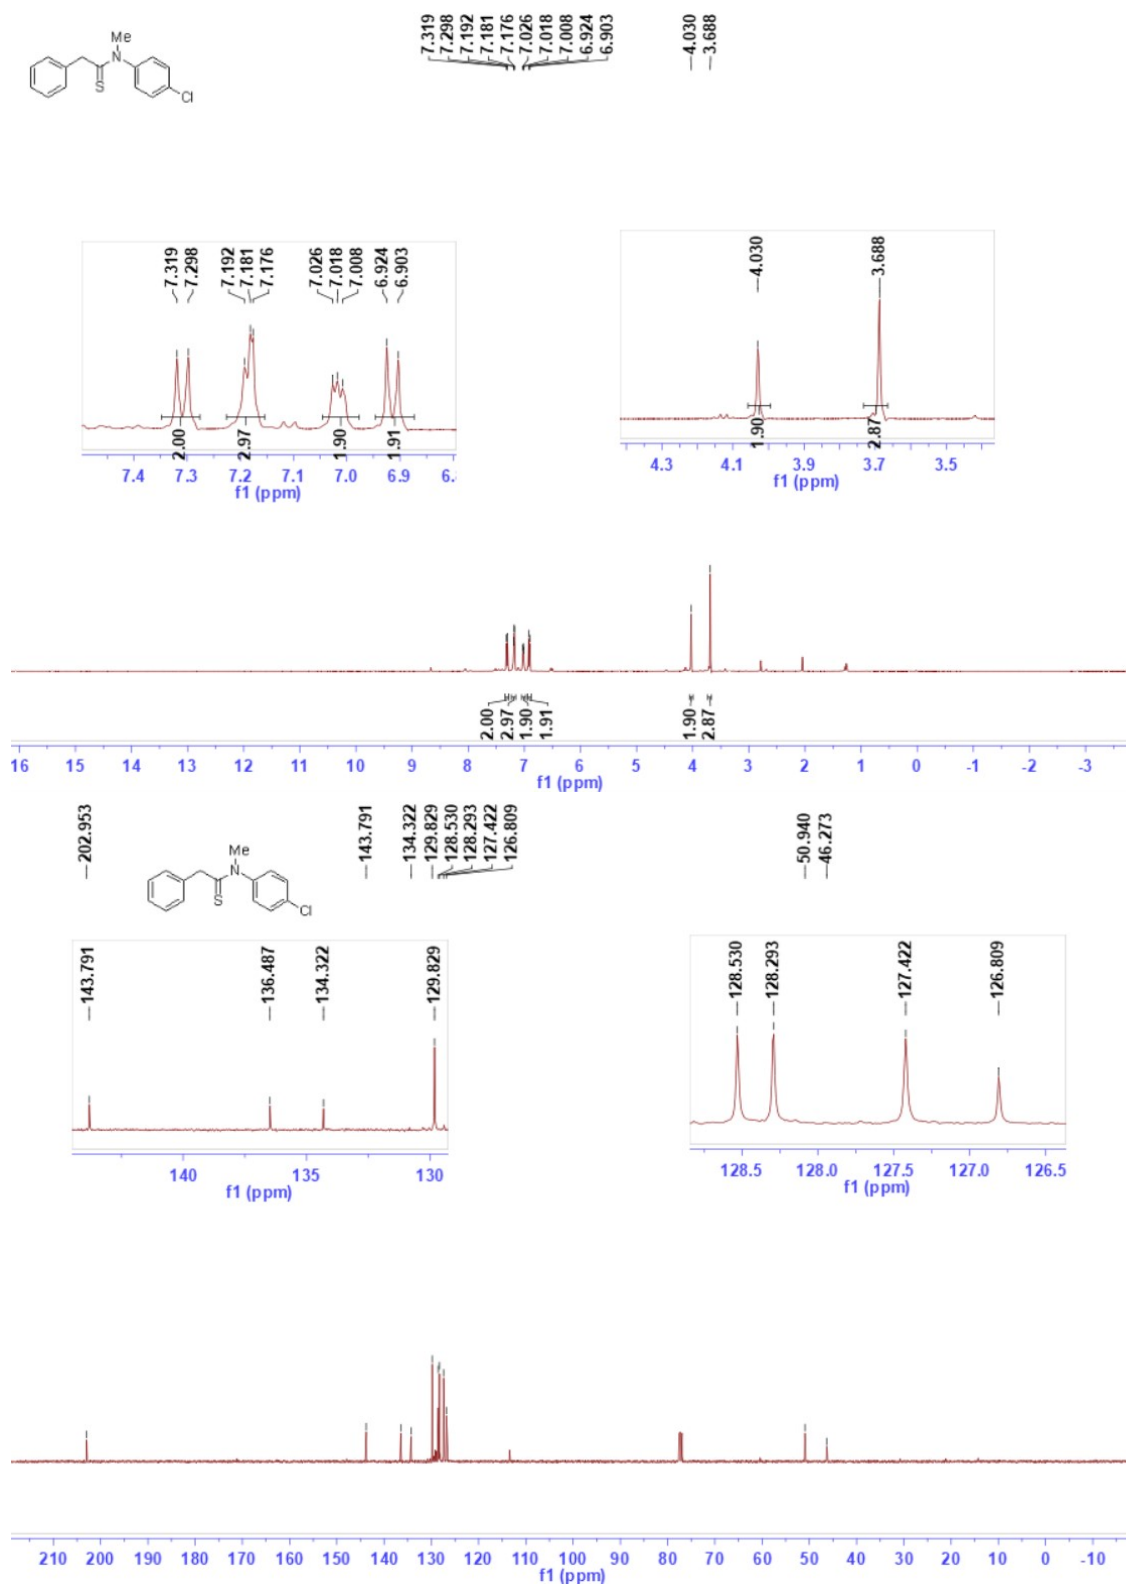

***N*-(4-methoxybenzyl)-2-phenylethanethioamide (3ba)**

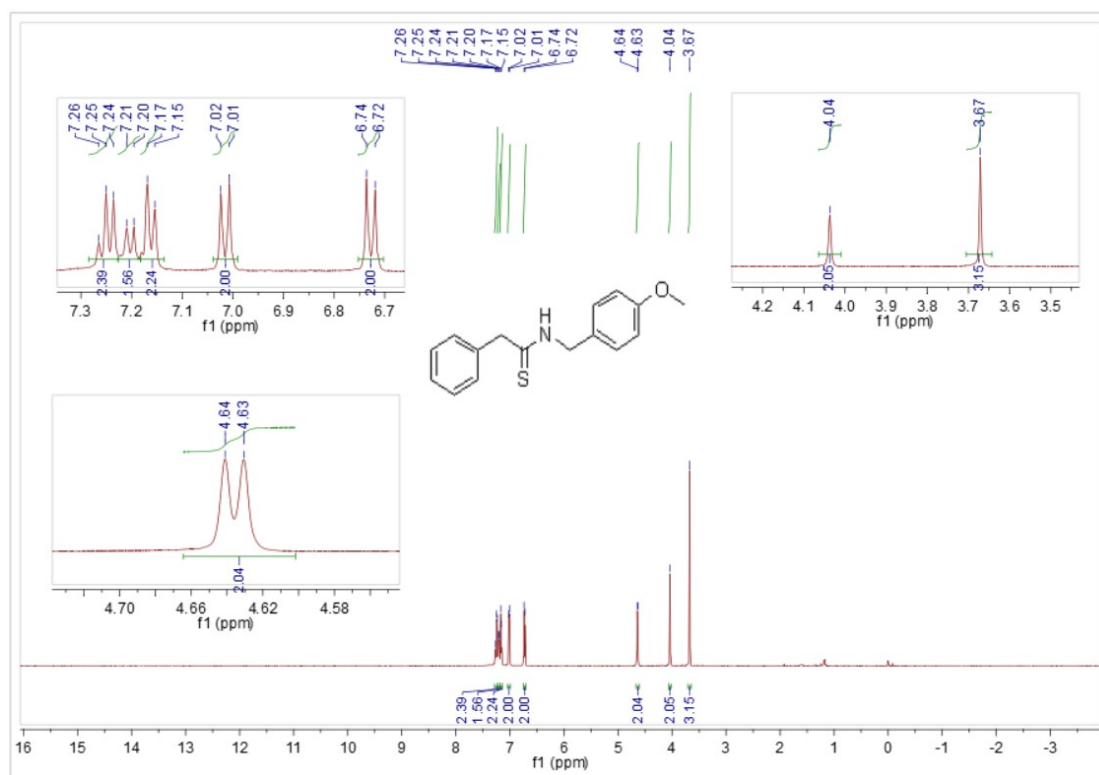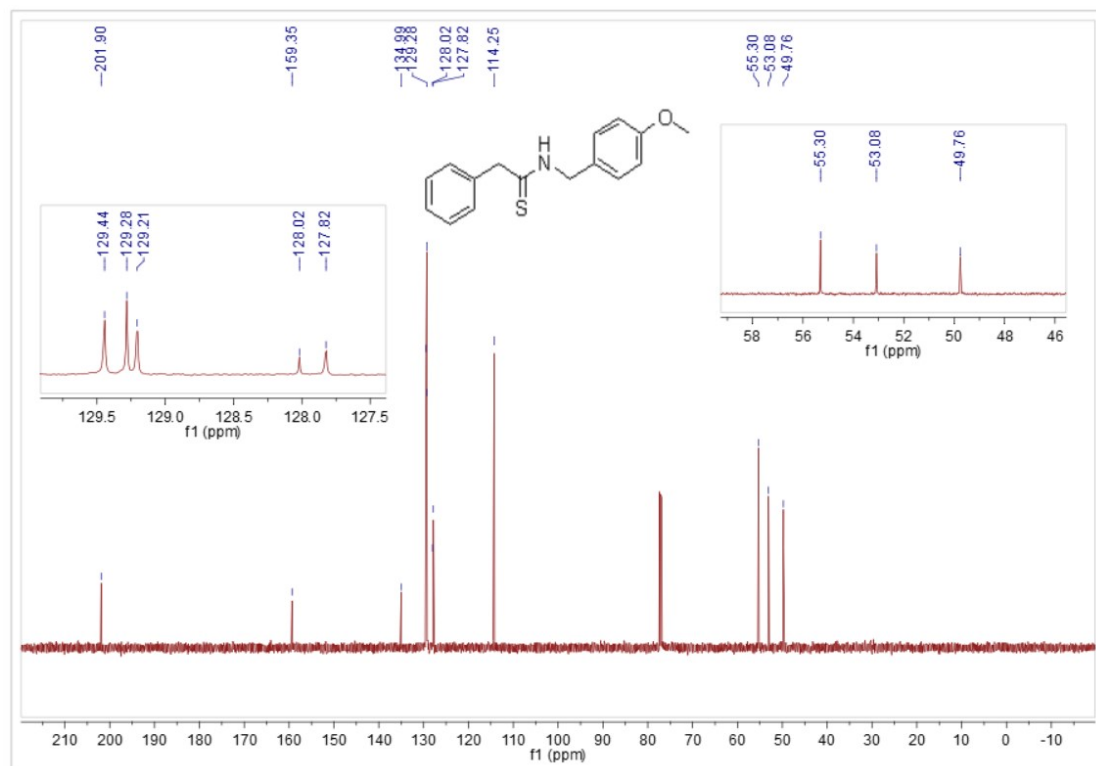

### *N*-benzyl-2-phenylethanethioamide (3b)

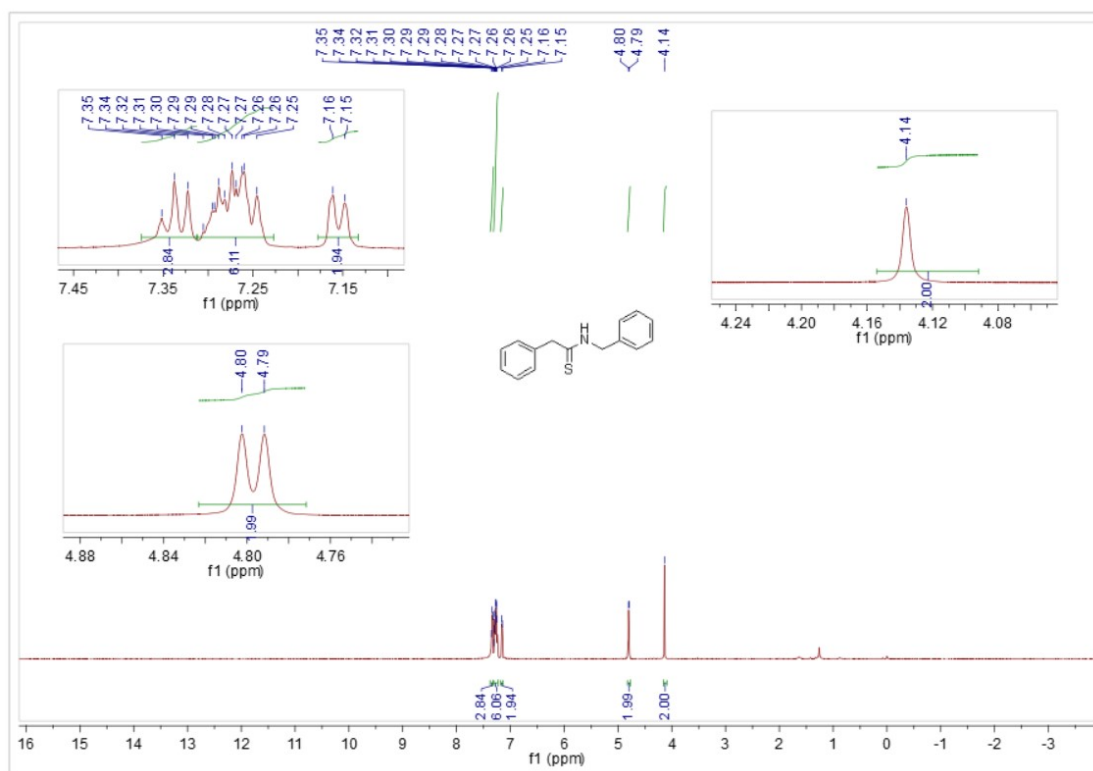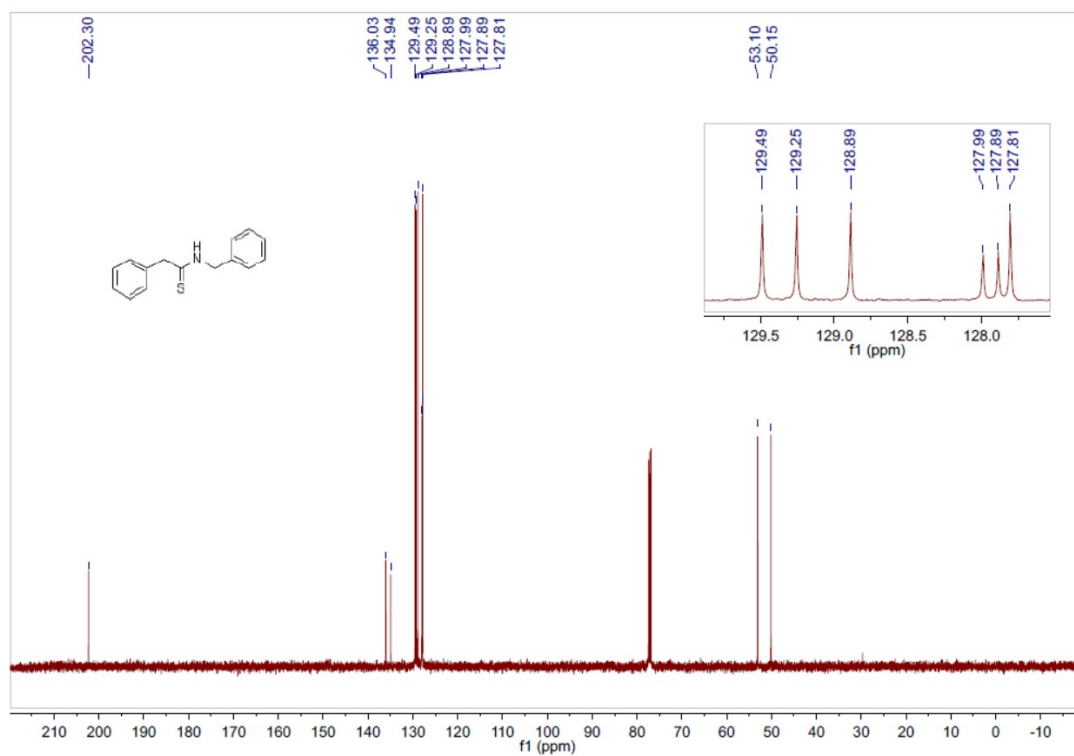

## 2-Phenyl-N-(4-(trifluoromethoxy)benzyl)ethanethioamide (3bc)

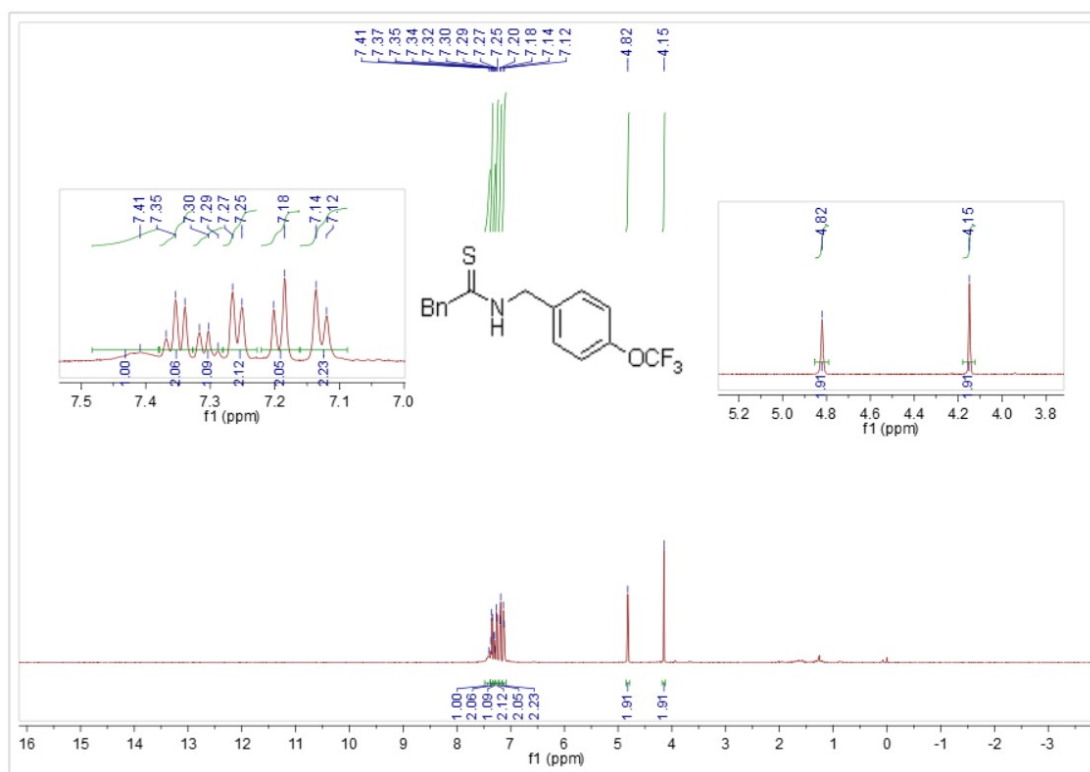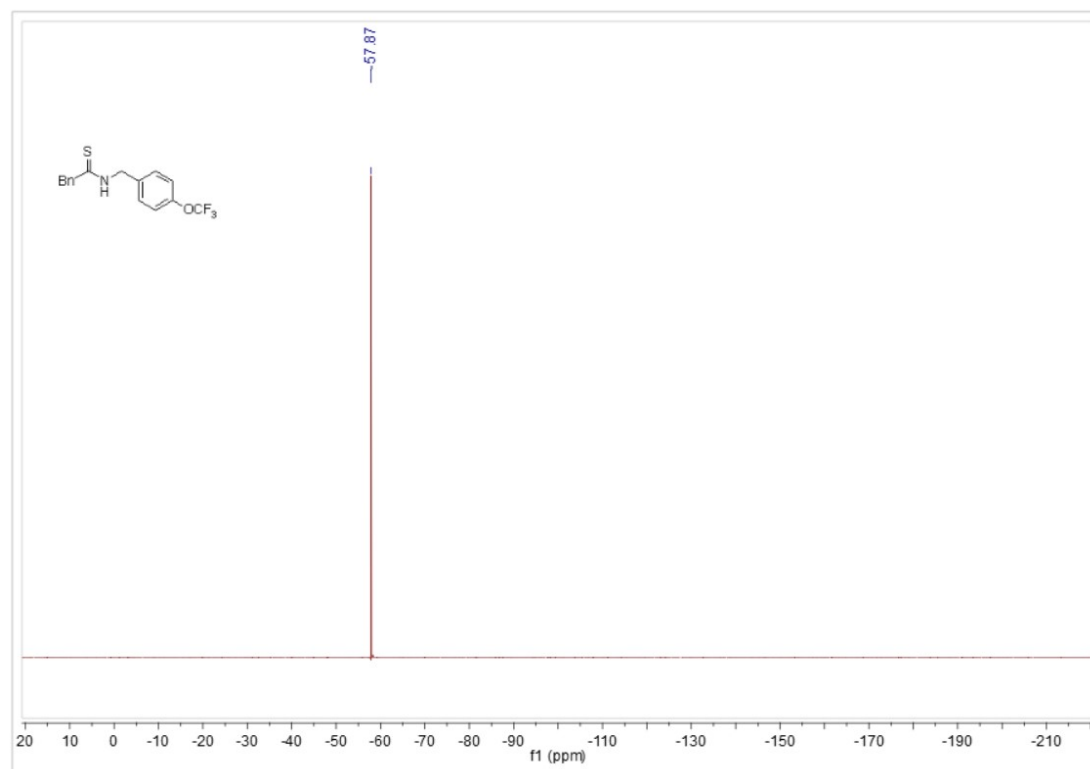

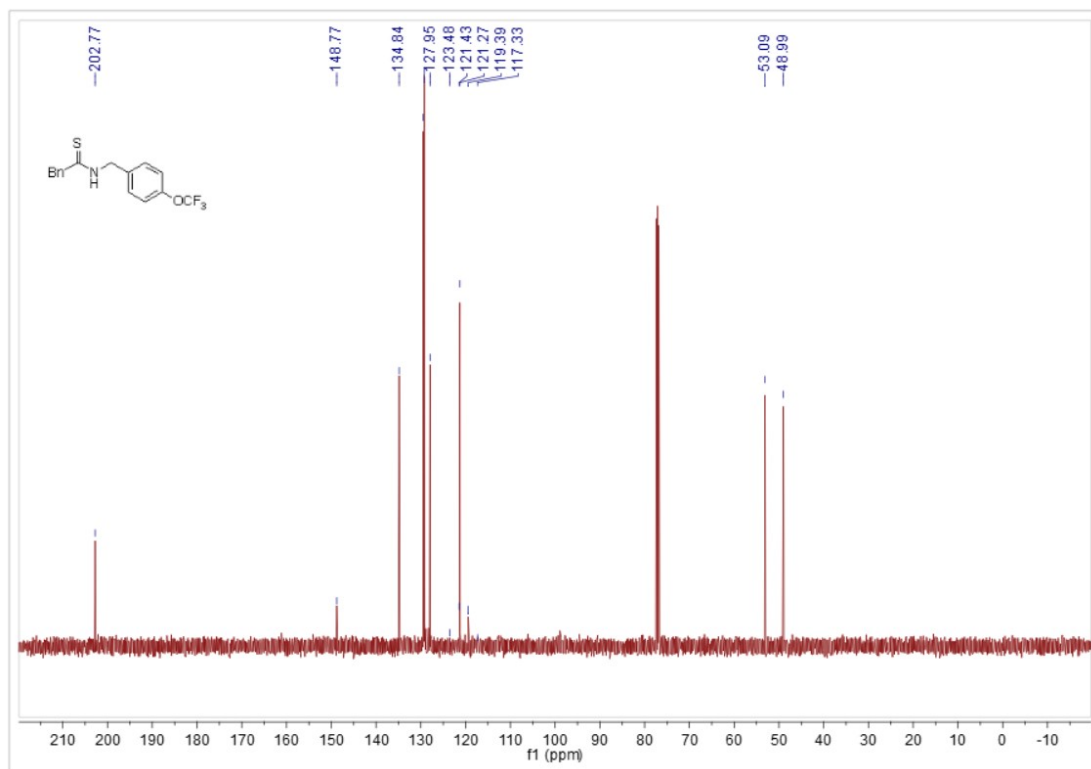



***N*-(4-cyanobenzyl)-2-phenylethanethioamide (3bd)**

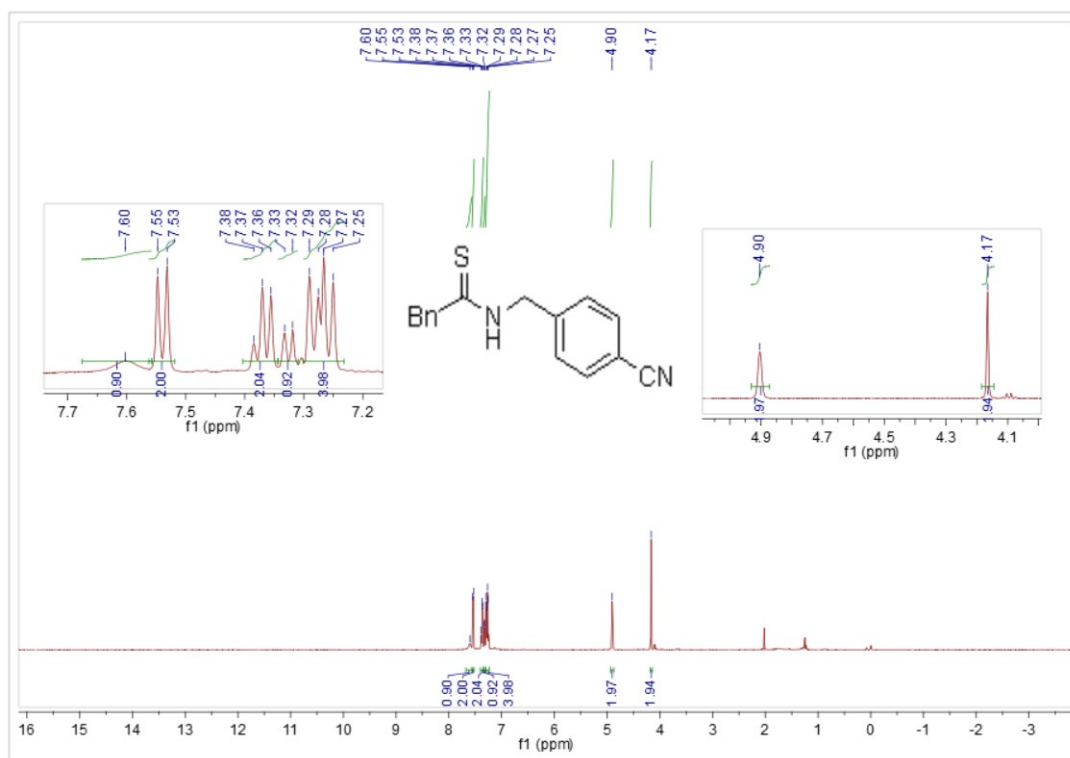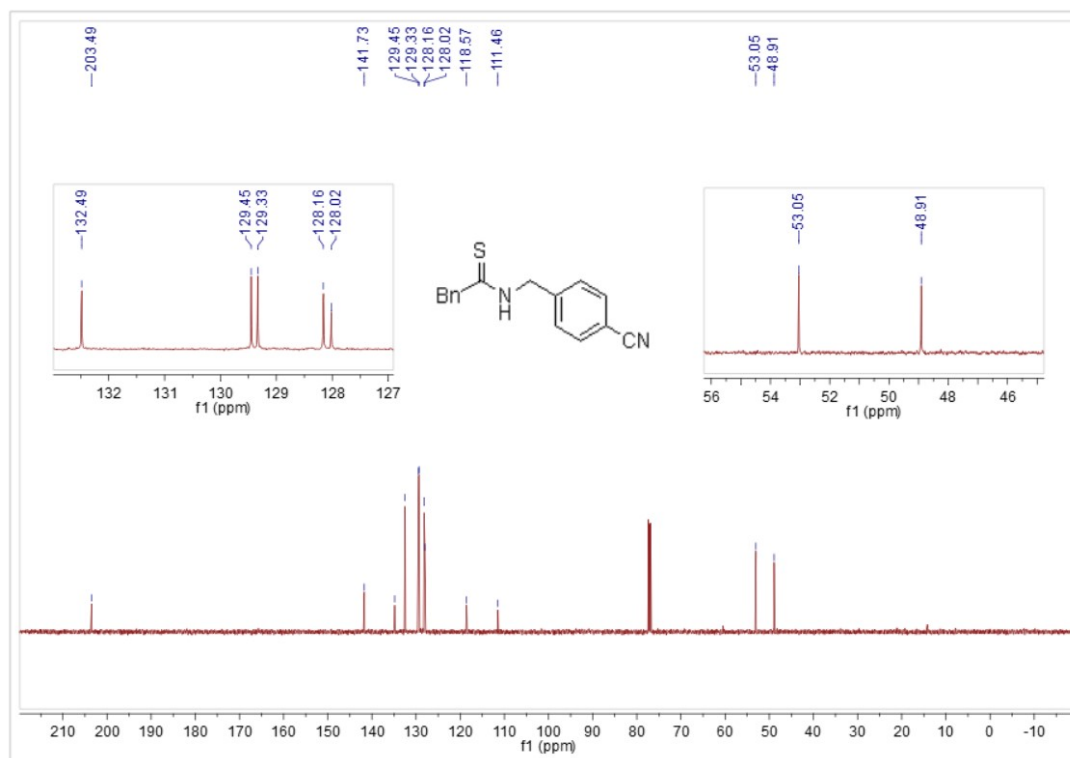

***N*-(4-bromobenzyl)-2-phenylethanethioamide (3be)**

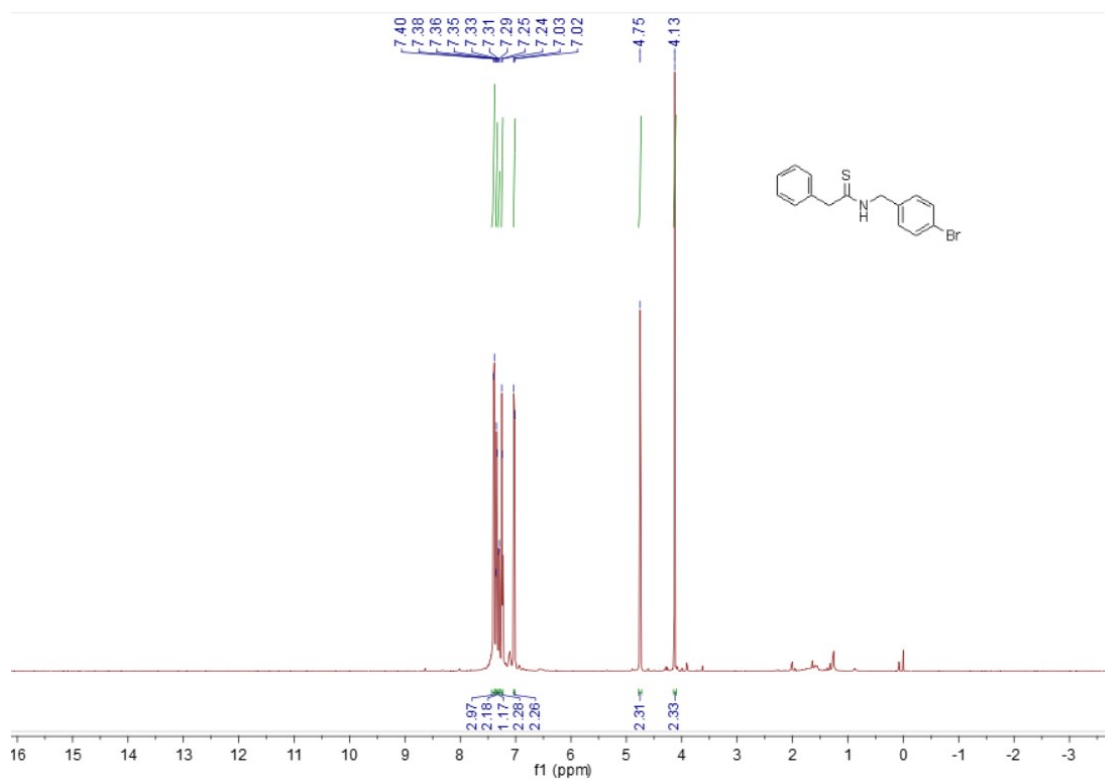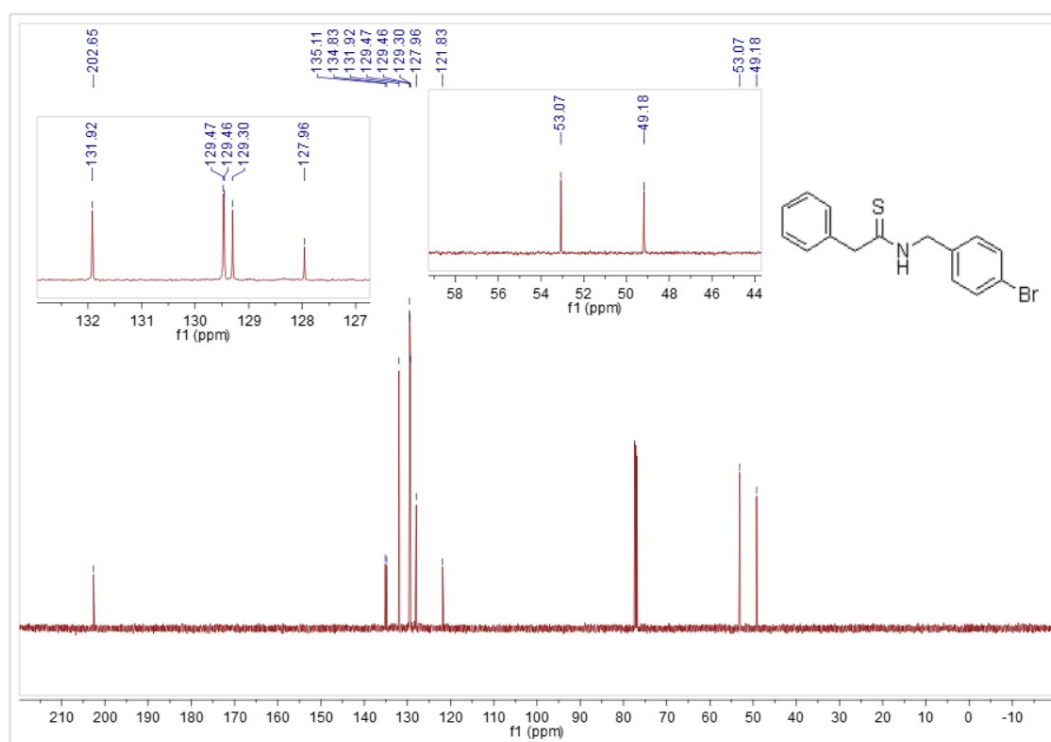

***N*-(3-chloro-4-fluorobenzyl)-2-phenylethanethioamide (3bf)**

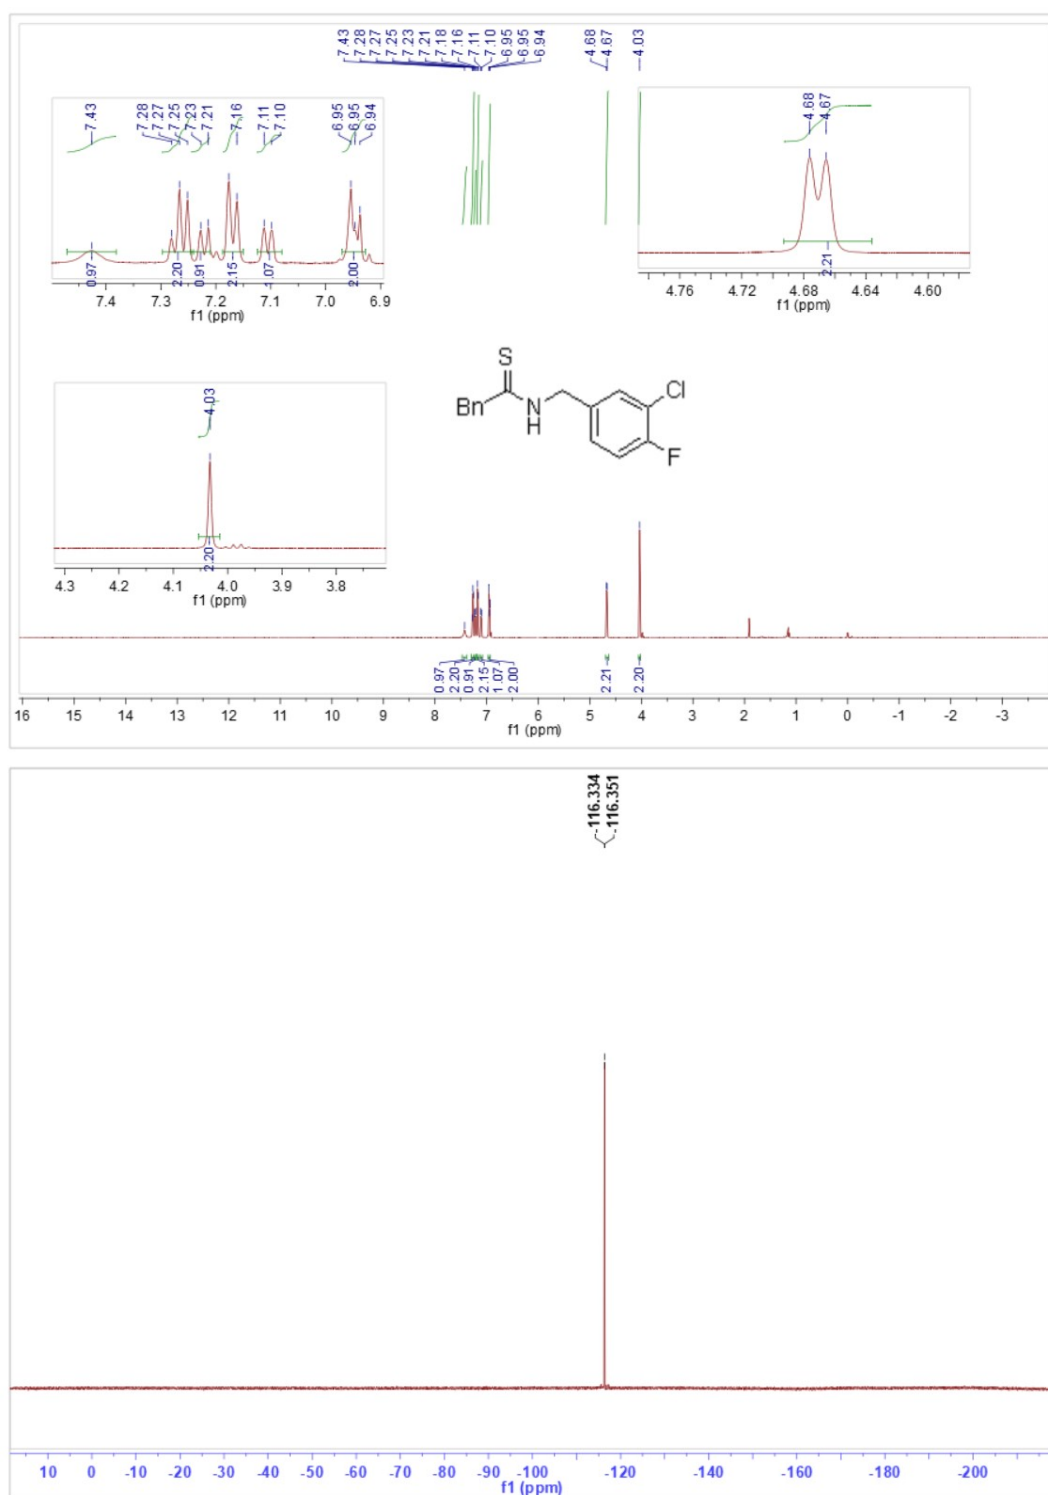

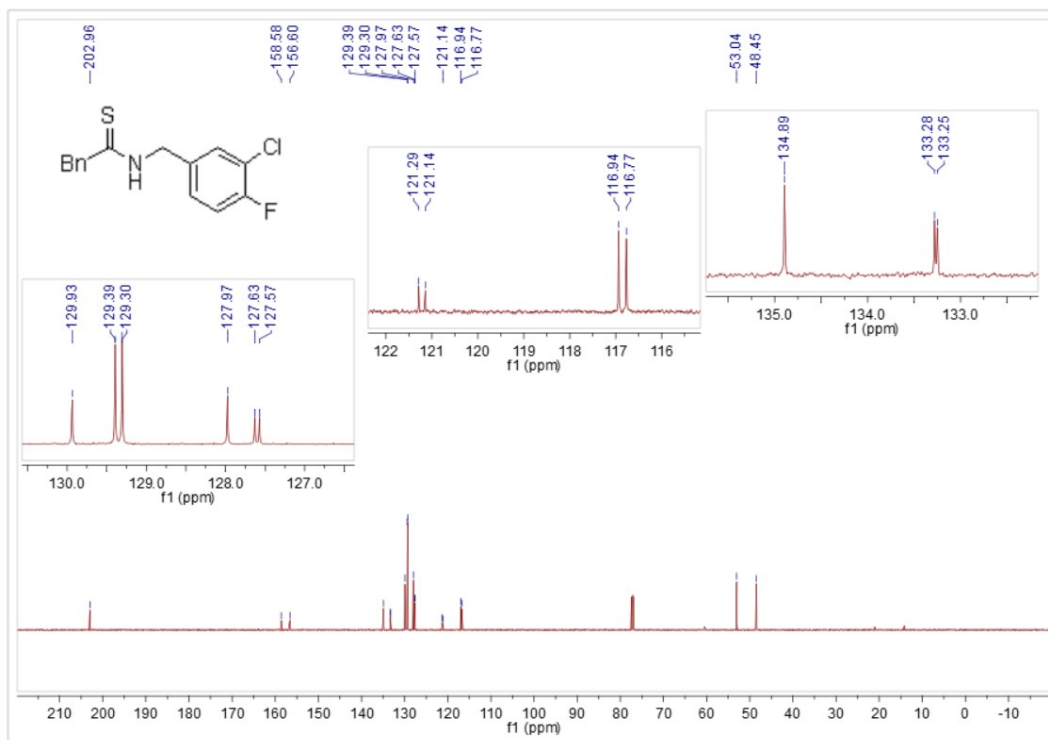

# Phenyl-*N*-(1-phenylethyl)ethanethioamide (3bg)

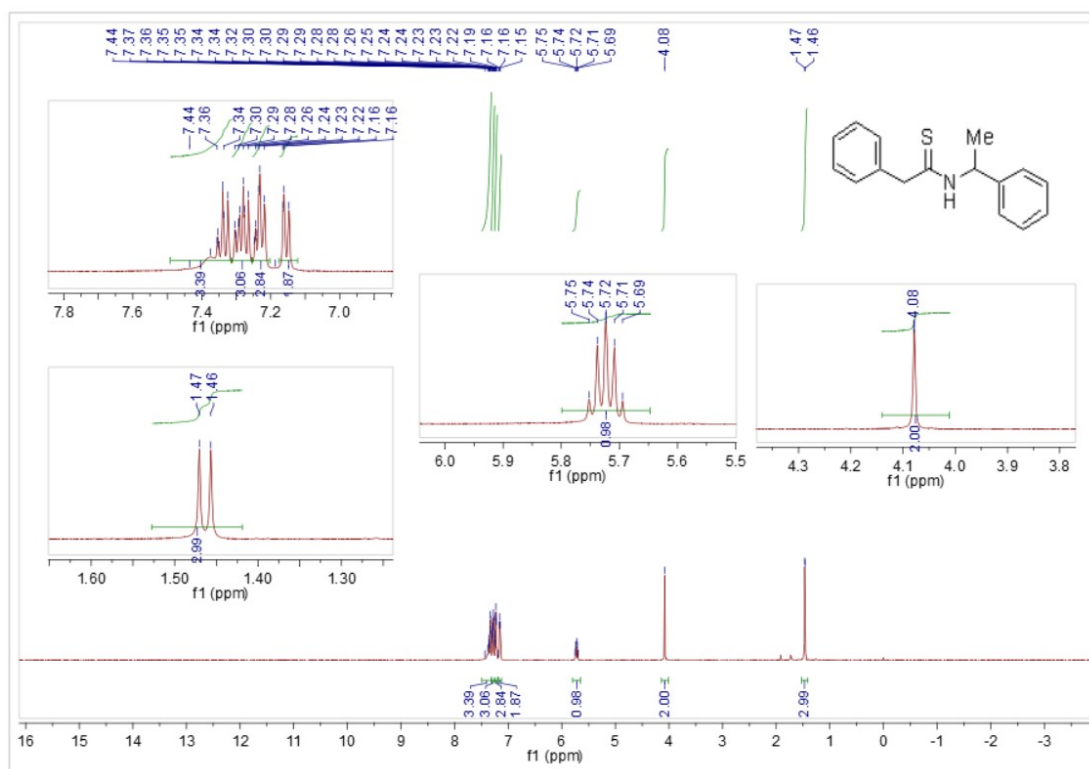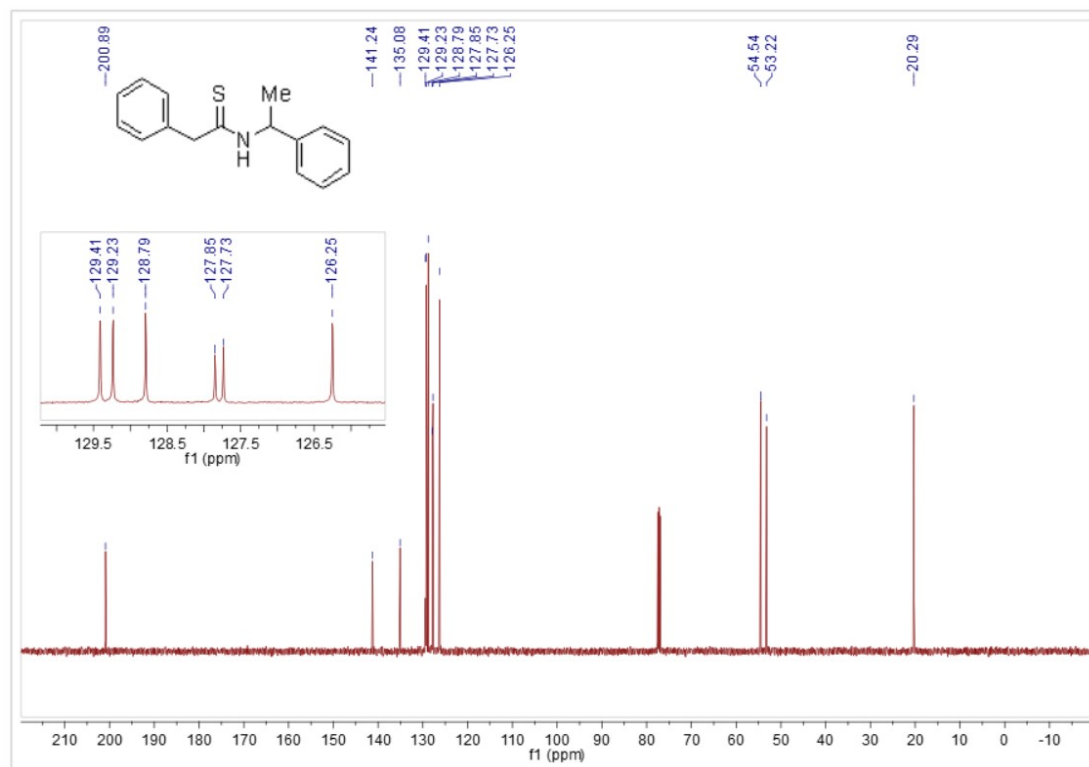

***N*-(2-(1*H*-indol-3-yl)ethyl)-2-phenylethanethioamide (3bh)**

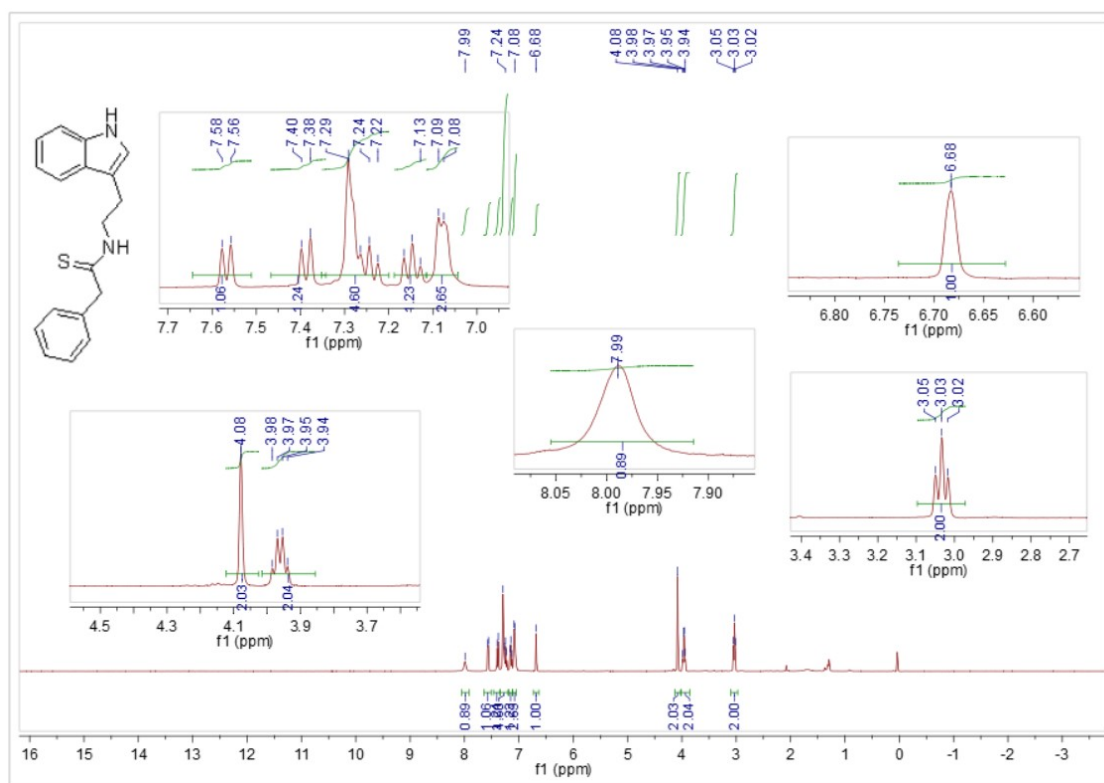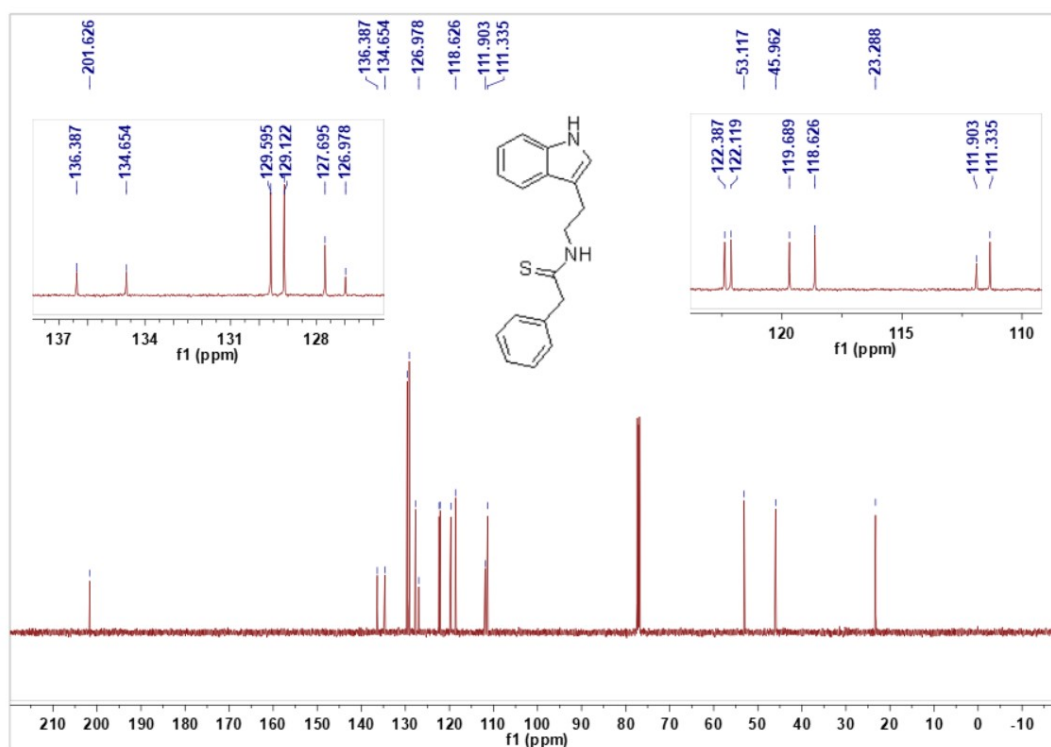

### *N*-(*tert*-butyl)-2-phenylethanethioamide (3b)

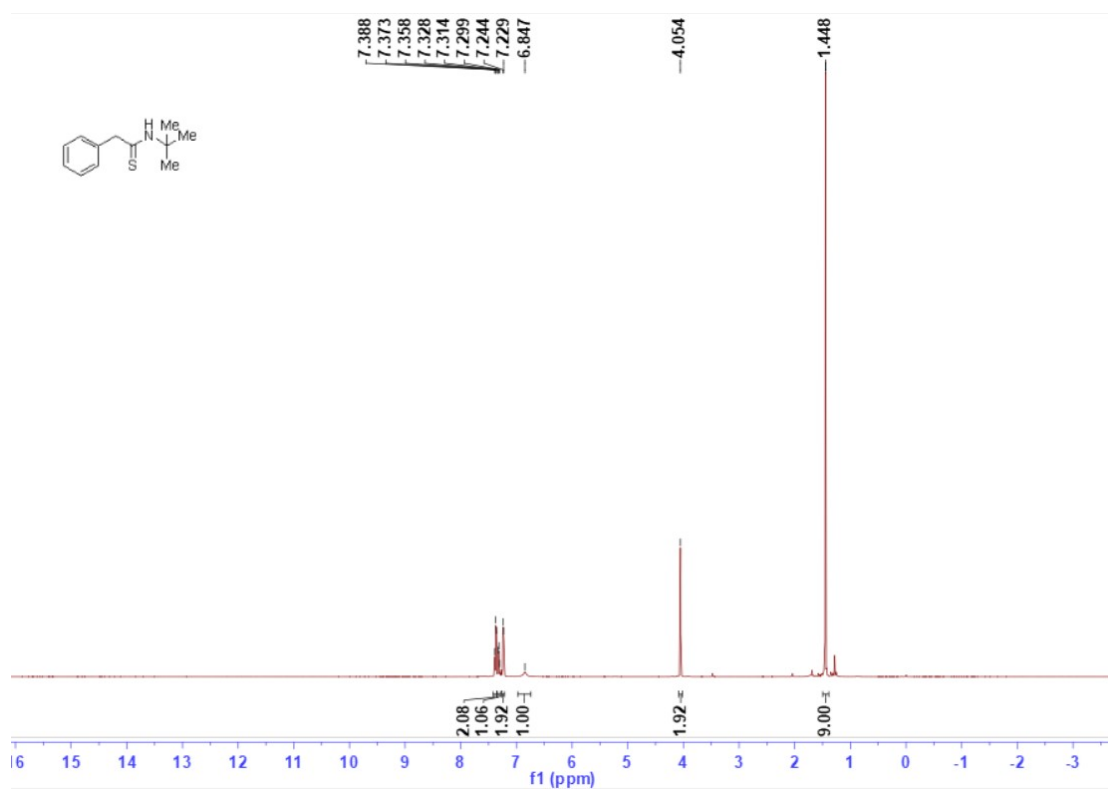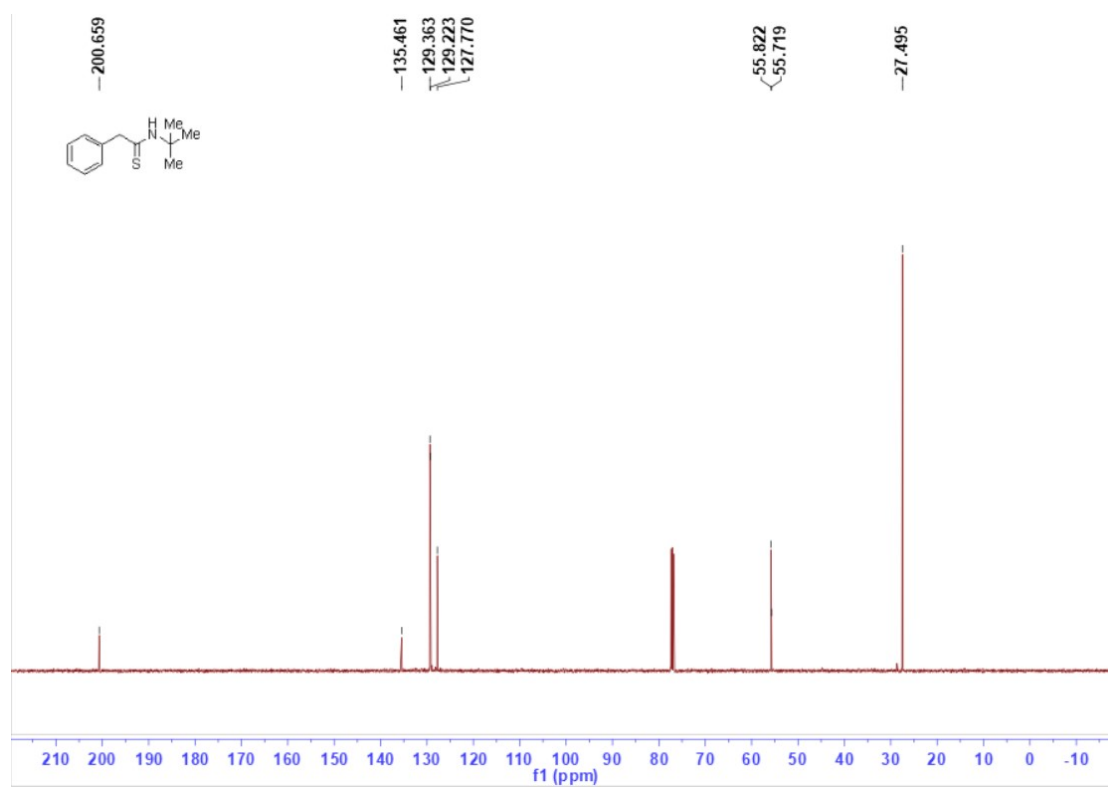

## 2-Phenyl-N-tritylethanethioamide (3bj)

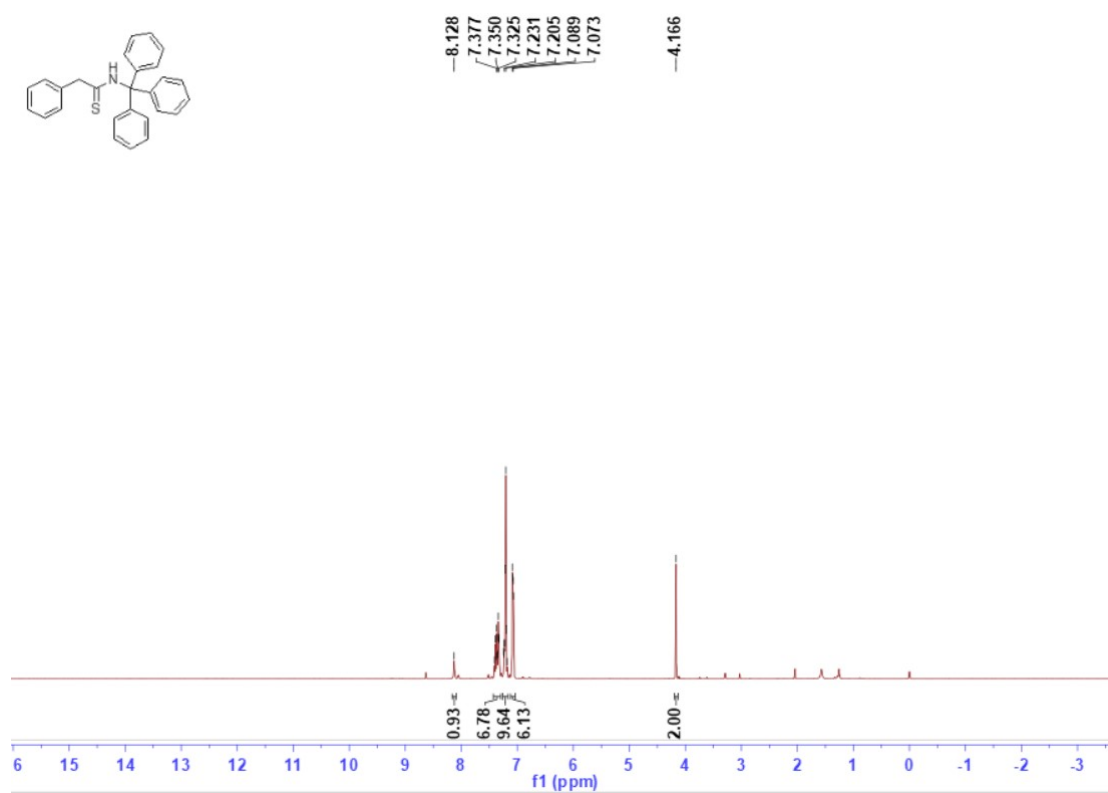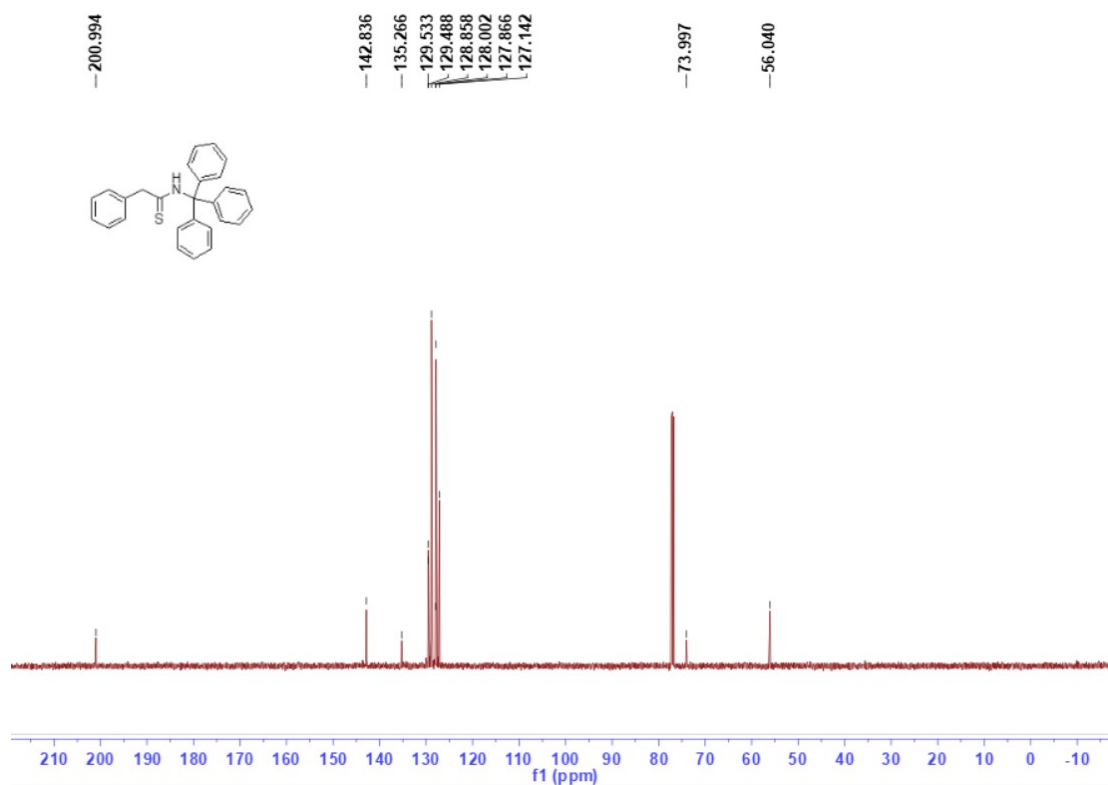



***N*-((3*s*,5*s*,7*s*)-adamantan-1-yl)-2-phenylethioamide (3bk)**

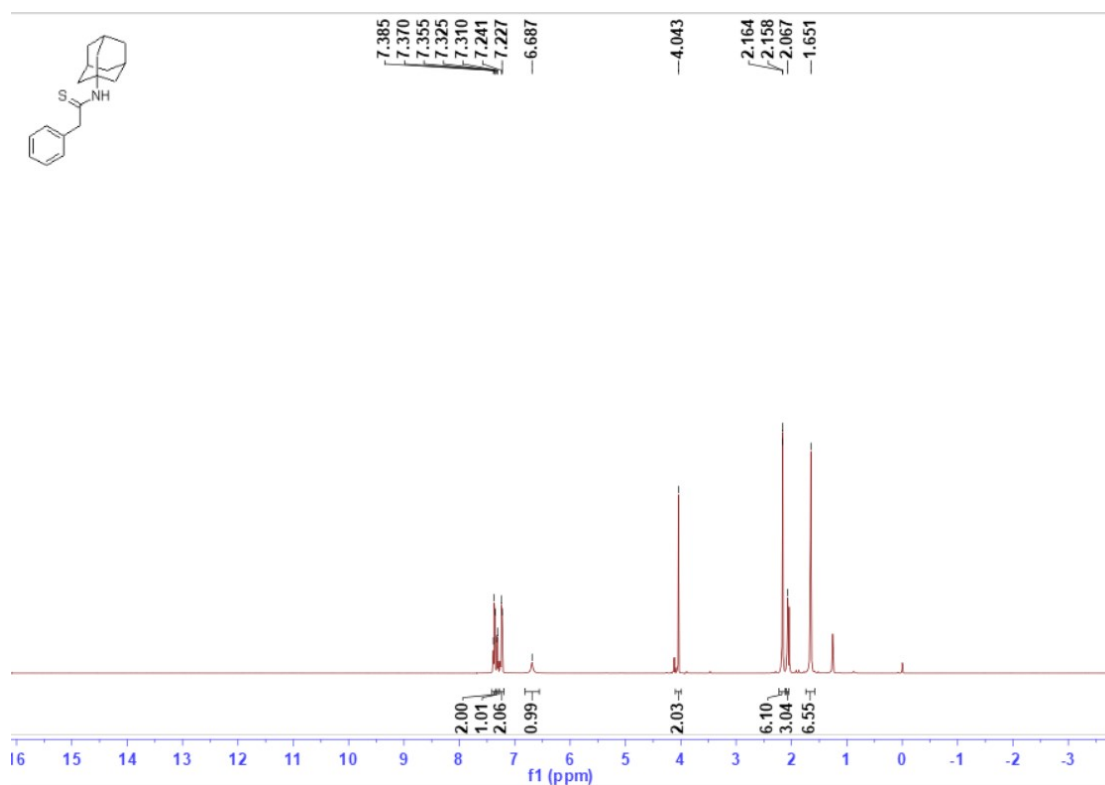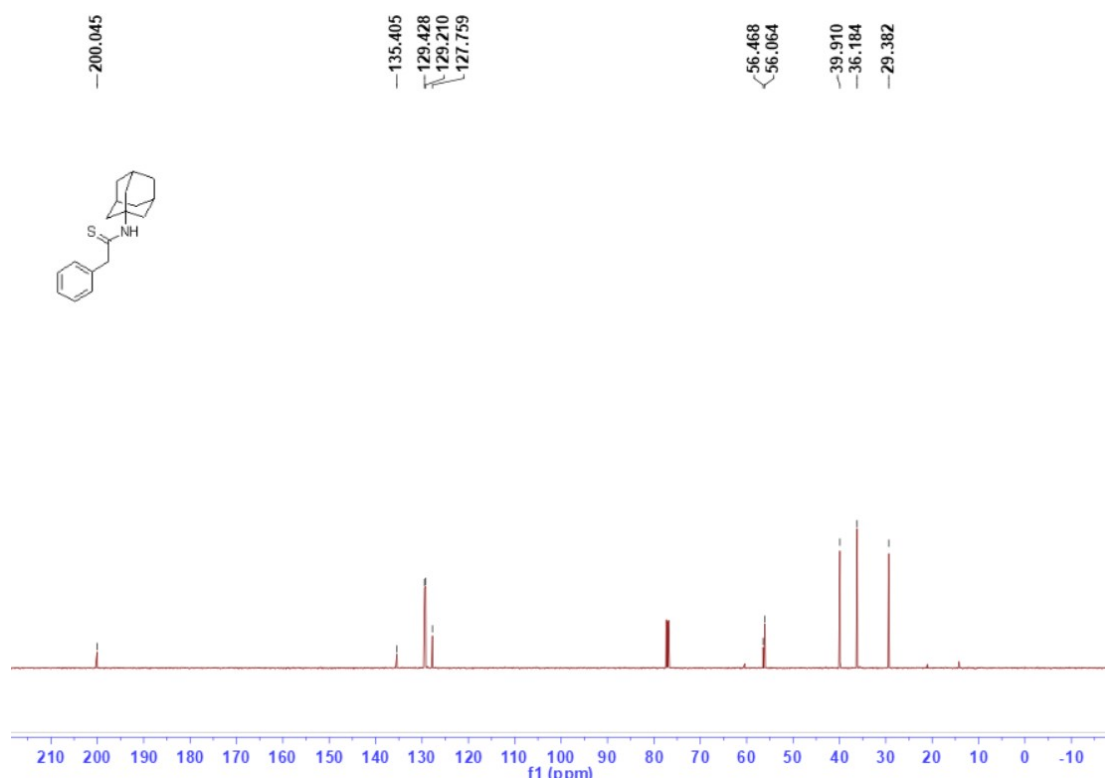

# 1-(2-Phenylethanethiyl)piperidine-2-carboxamide (3bl)

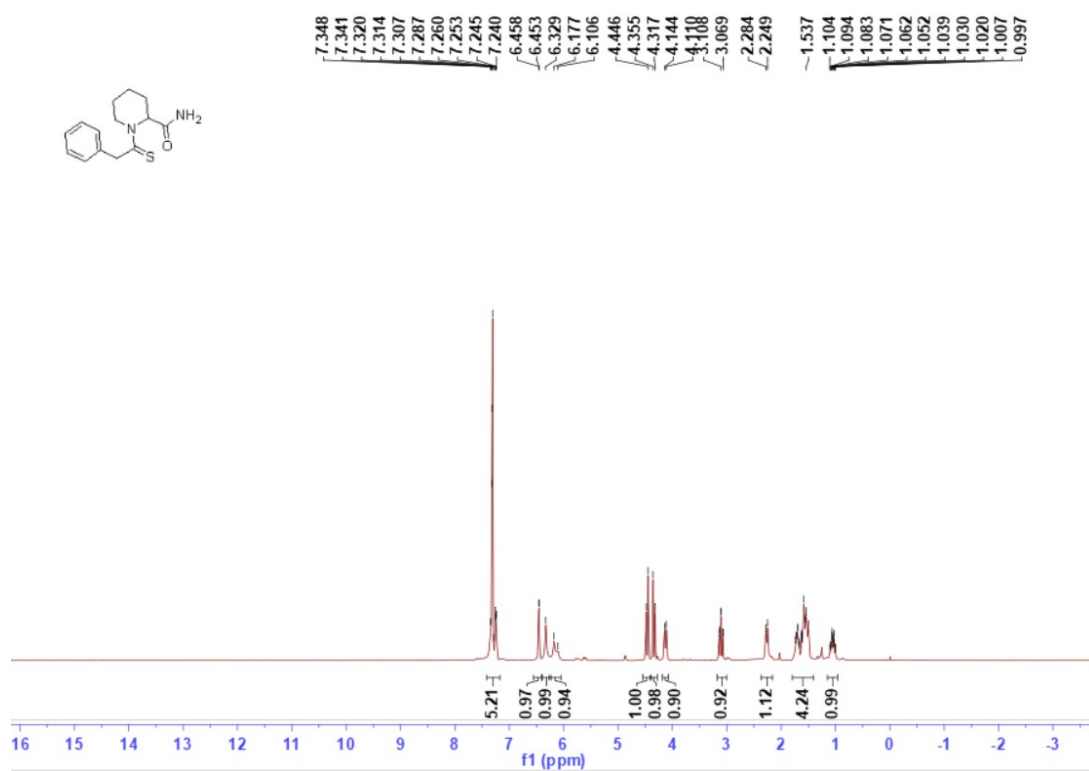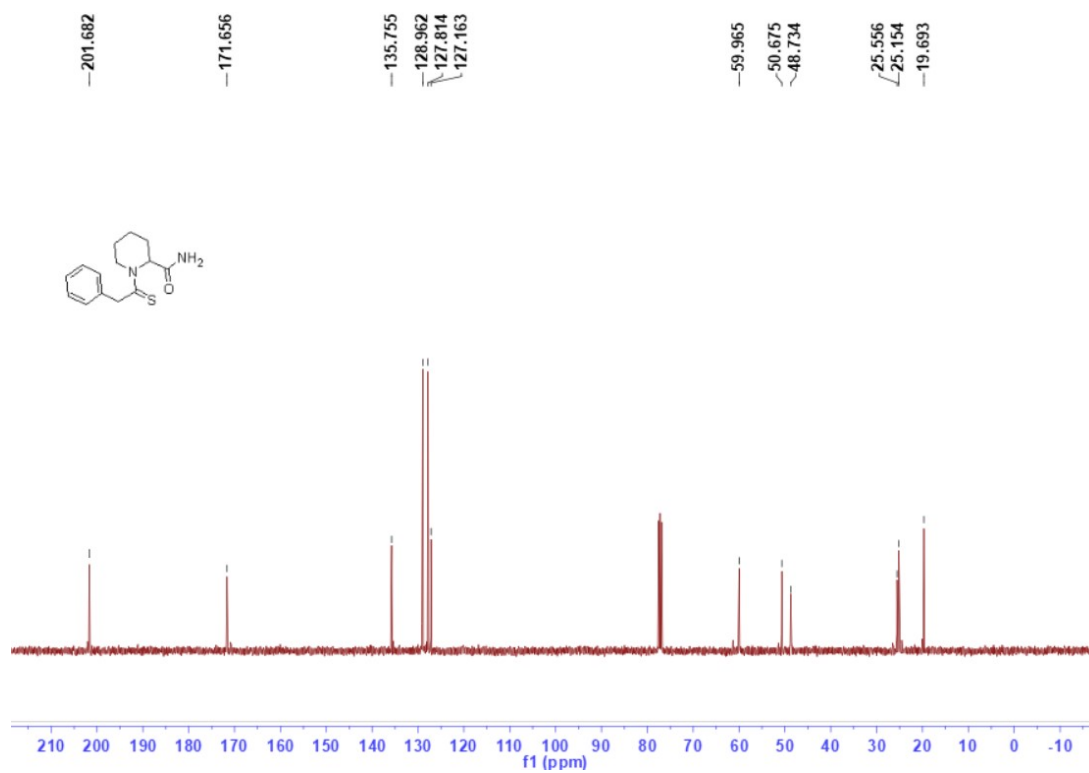

**(1*R*,5*S*)-8-(2-Phenylethanethioyl)-8-azabicyclo[3.2.1]octan-3-one (3bm)**

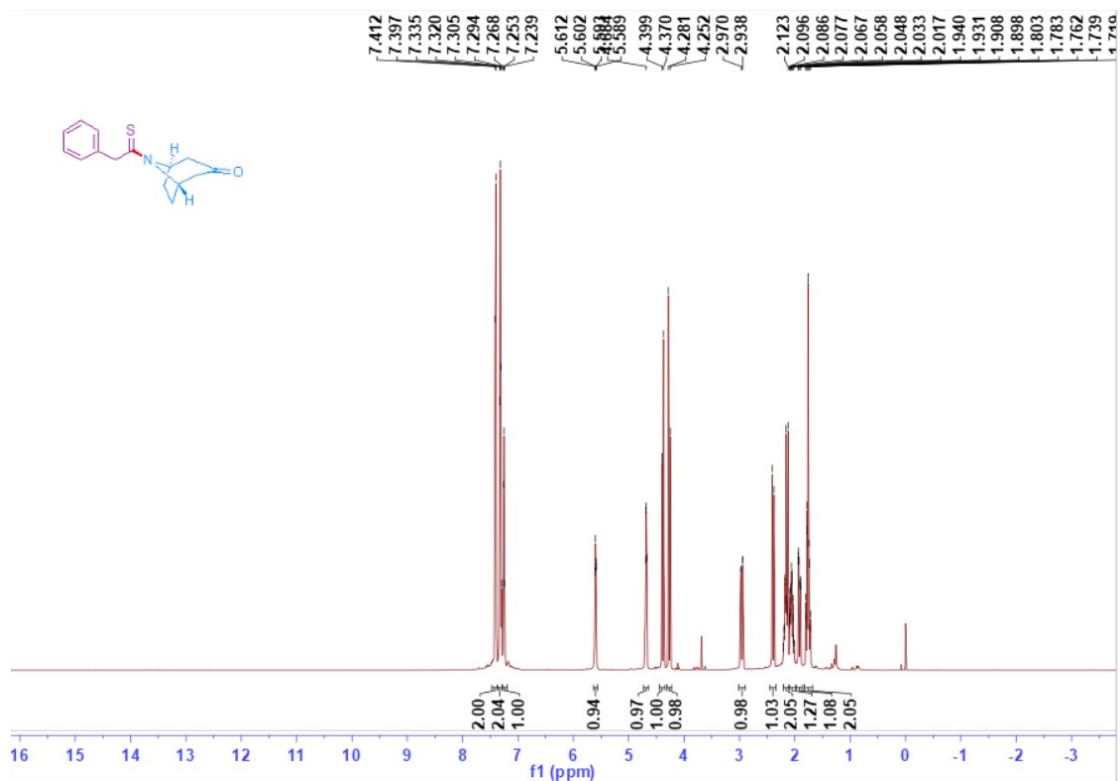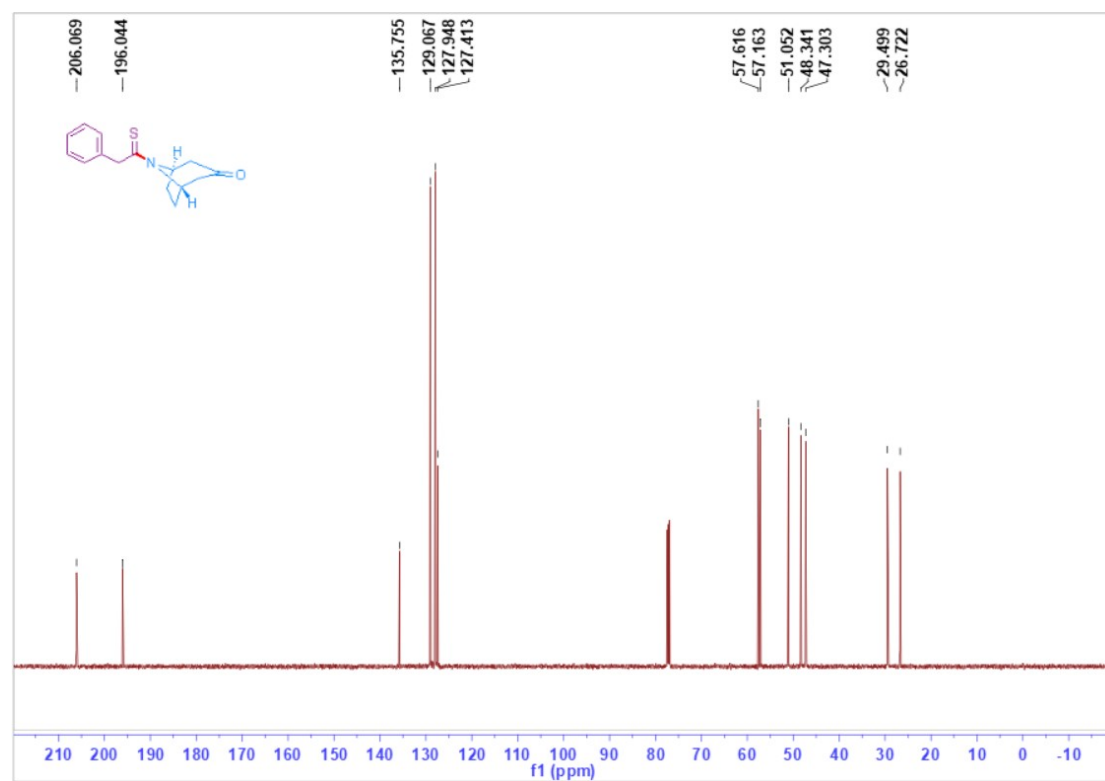

**Tert-butyl (1*S*,4*S*)-5-(2-phenylethanethioyl)-2,5-diazabicyclo[2.2.1]heptane-2-carboxylate (3bn)**

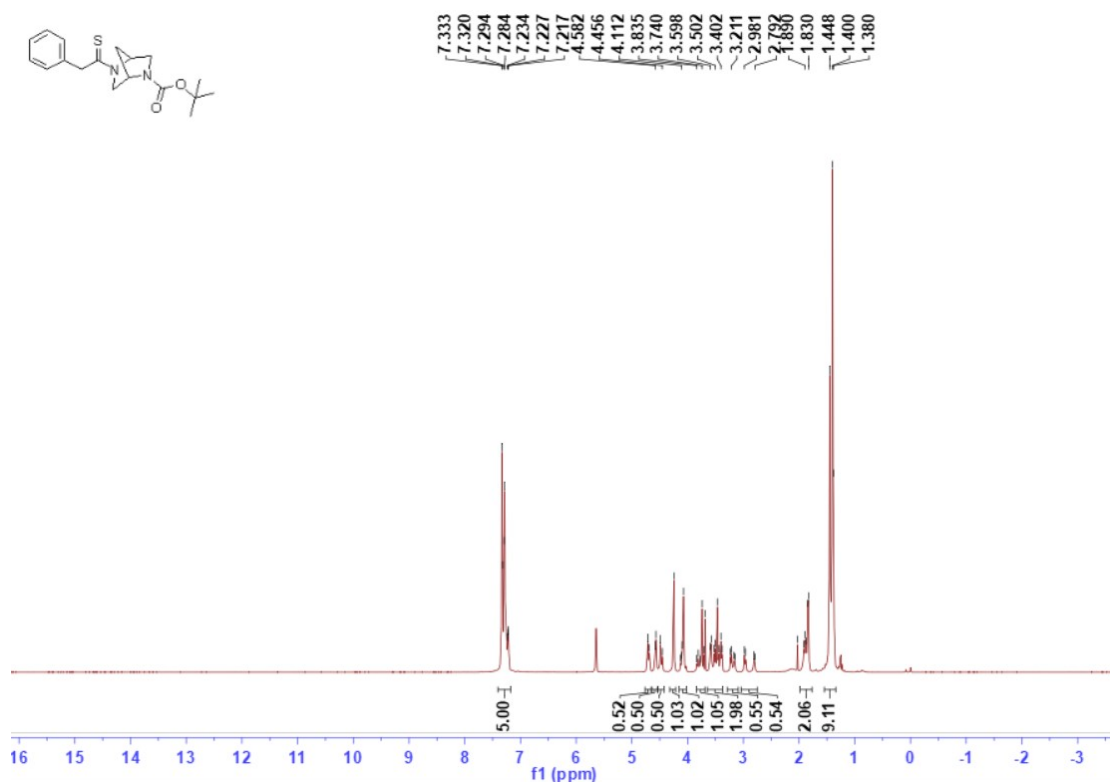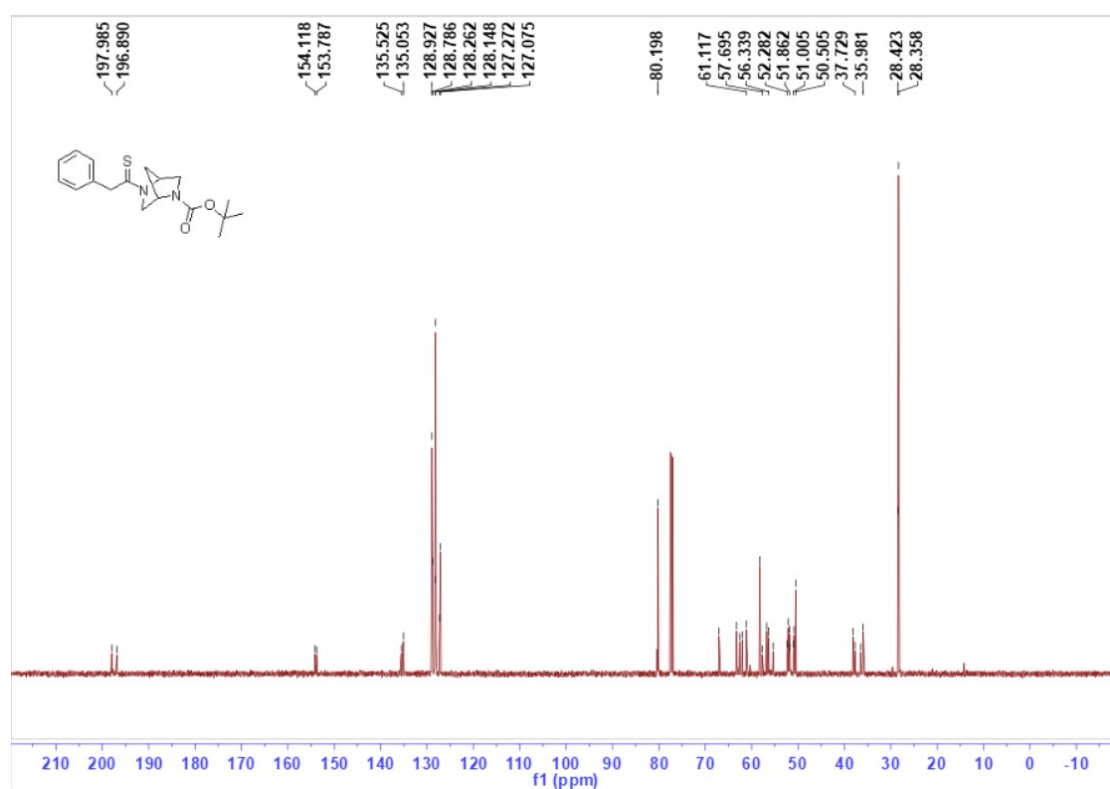

**(1*S*,5*R*)-3-(2-Phenylethanethioyl)-1,2,3,4,5,6-hexahydro-8*H*-1,5-methanopyrido[1,2-*a*][1,5]diazocin-8-one (3b)**

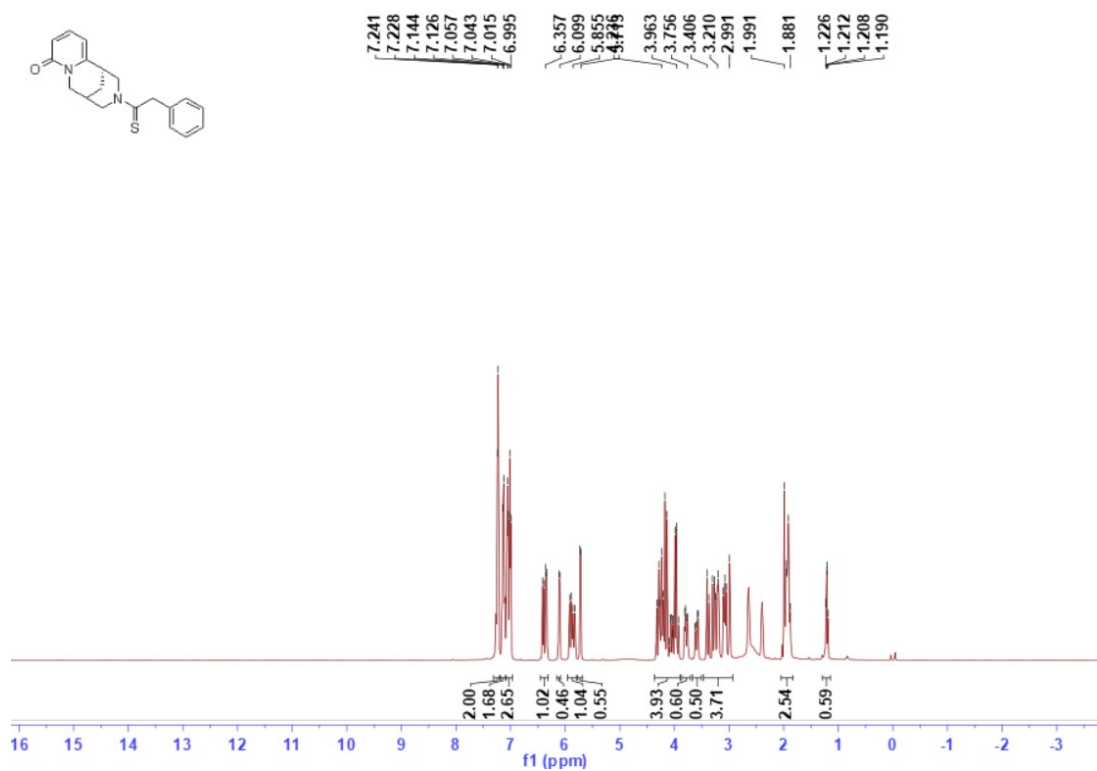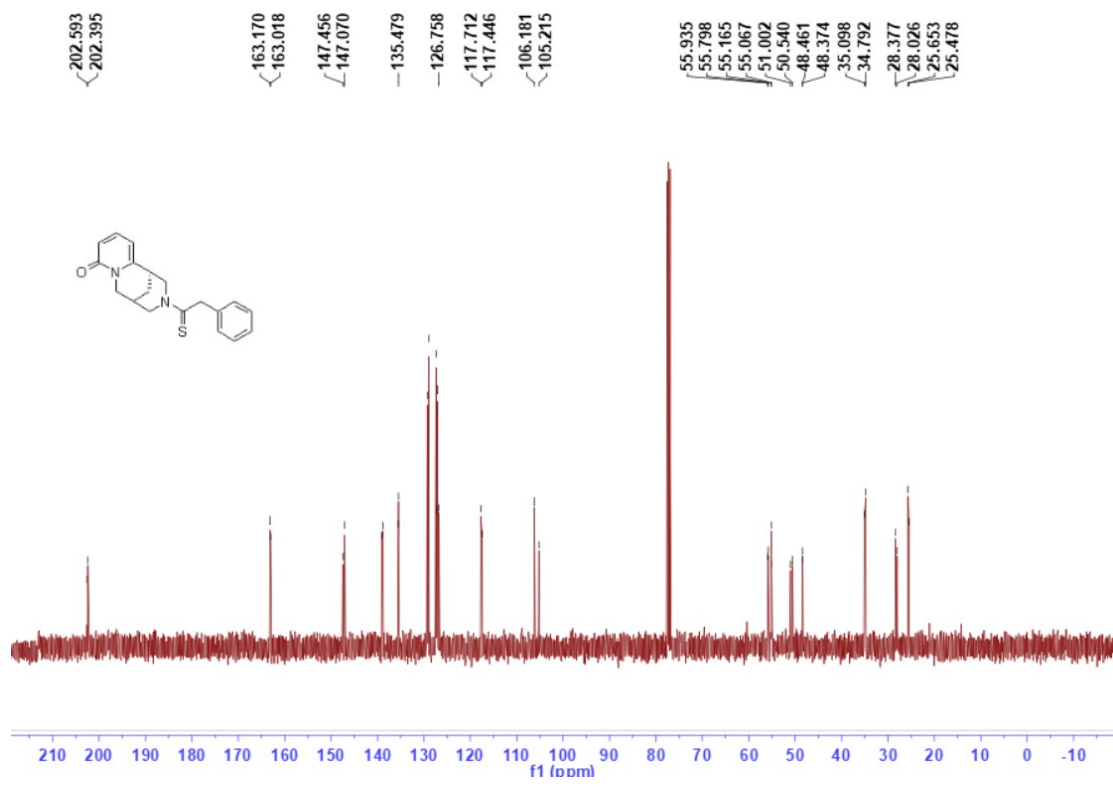

# Methyl (2-phenylethanethioyl)glycinate (3ca)

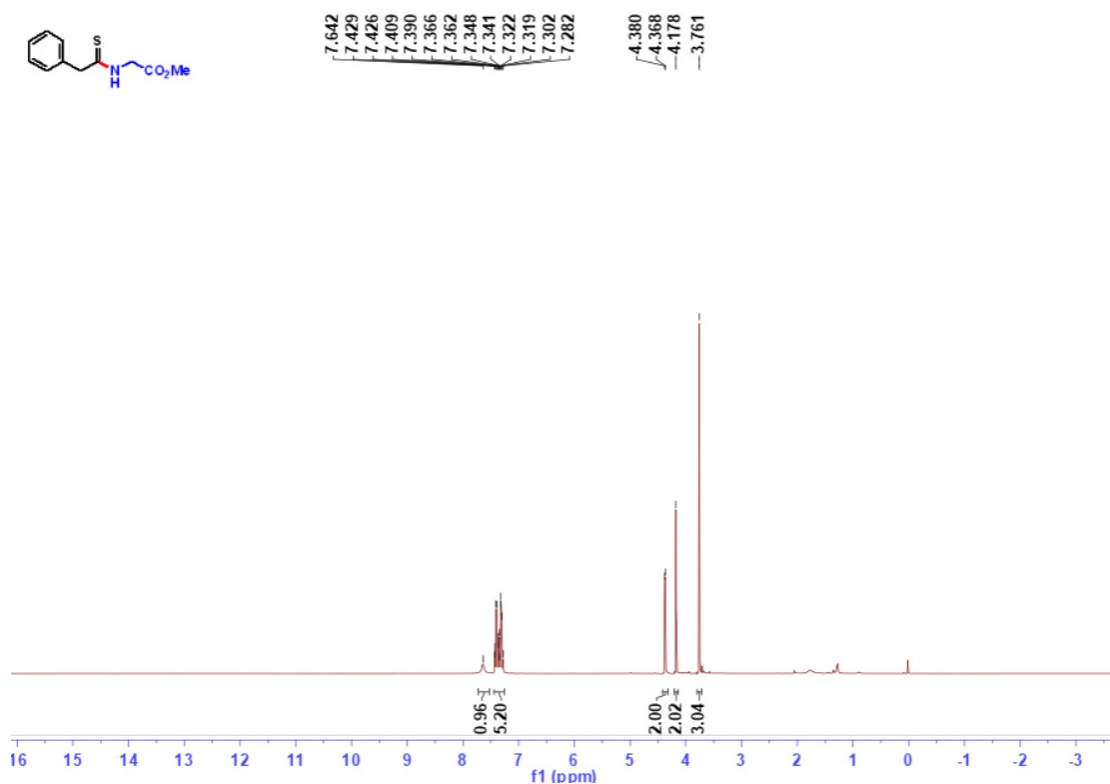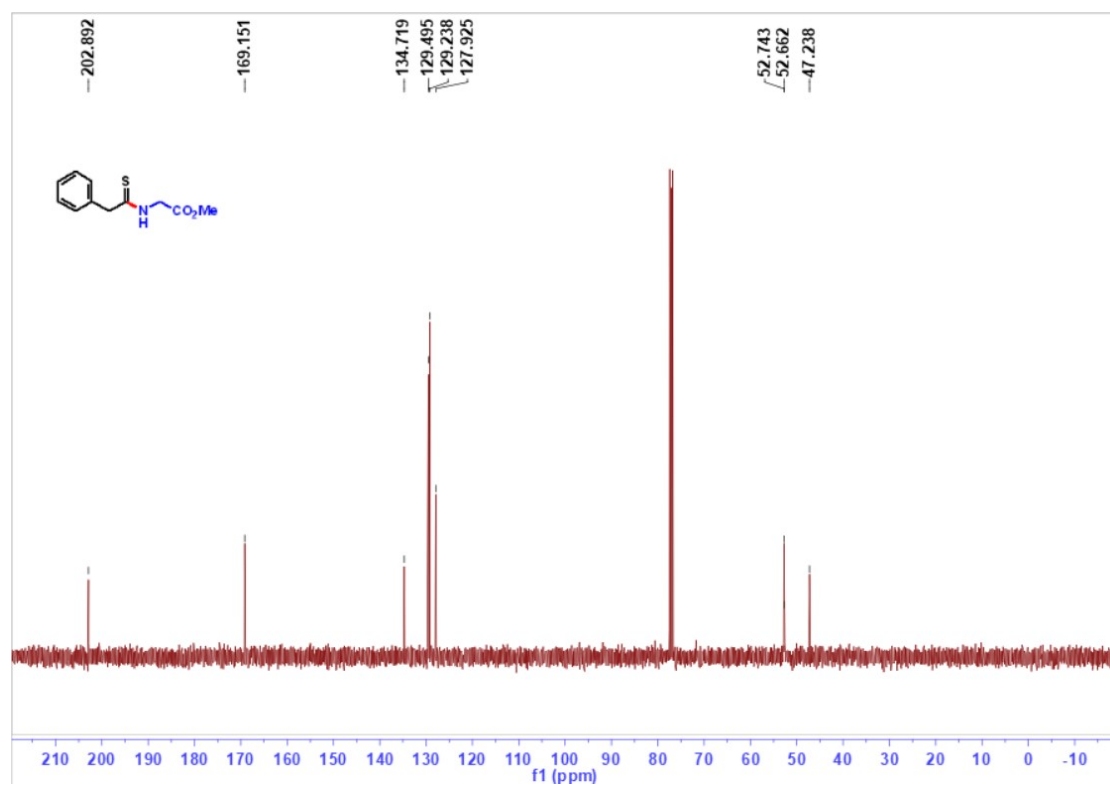

# Methyl (2-phenylethanethioyl)-L-valinate (3cb)

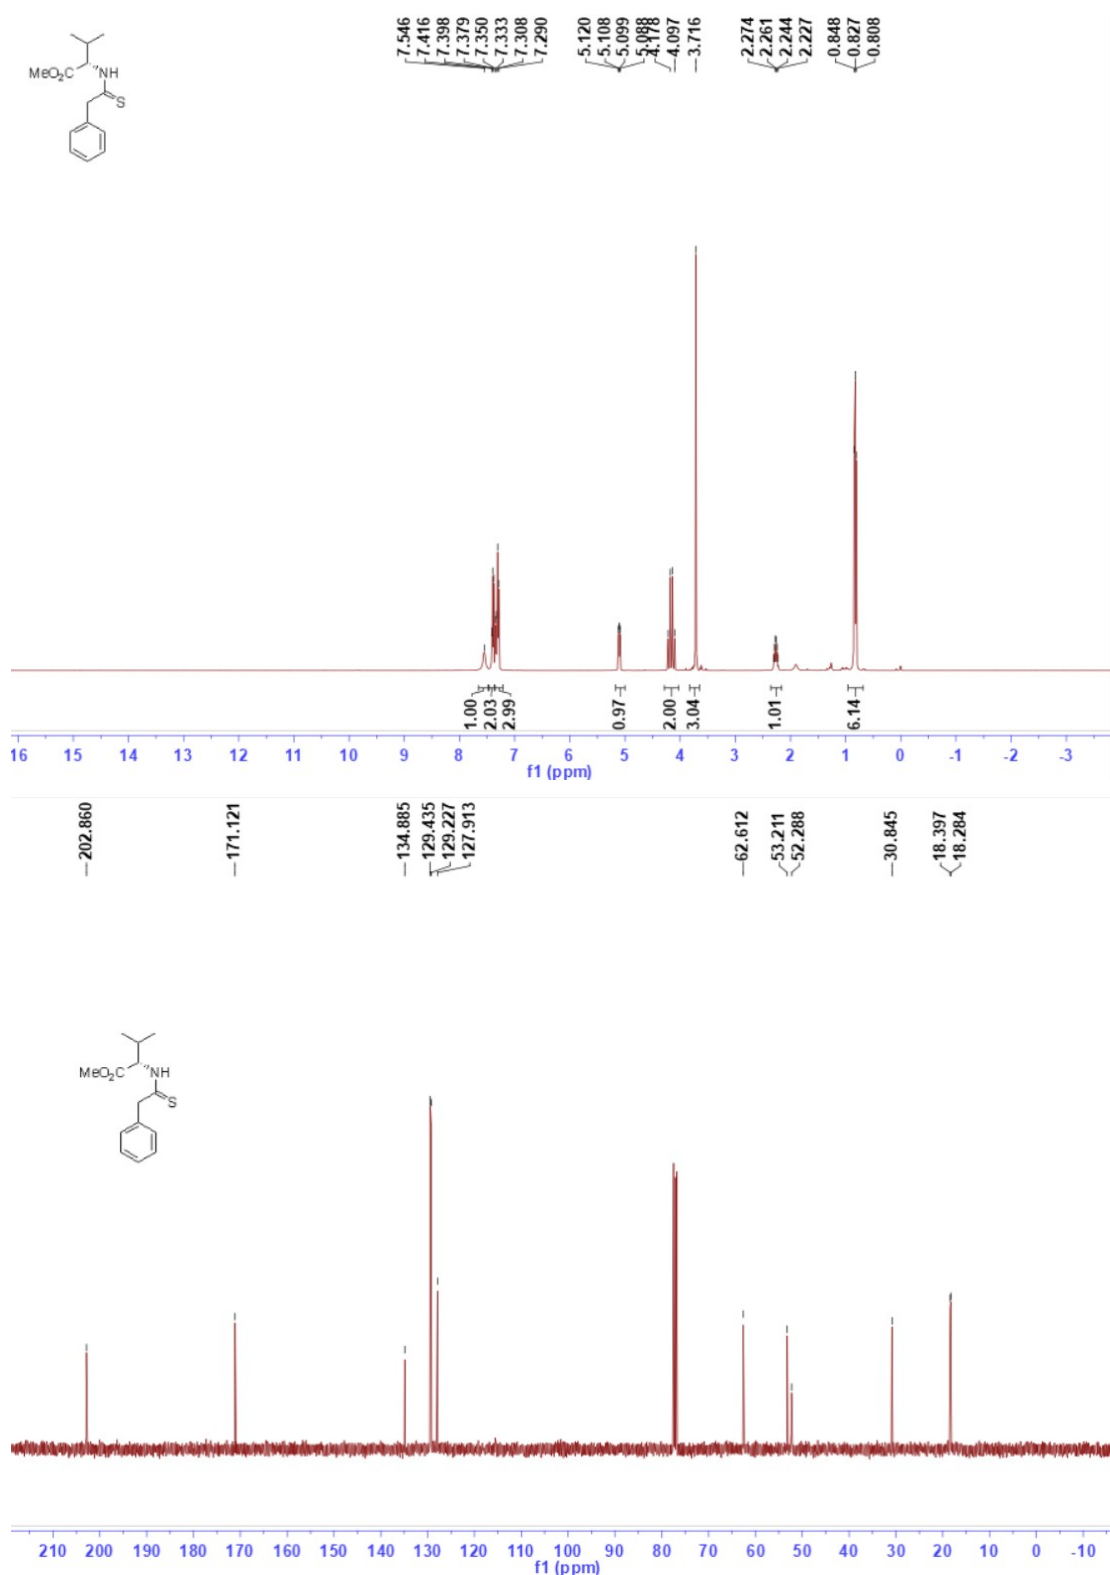

# Methyl (2-phenylethanethioyl)-L-phenylalaninate (3c)

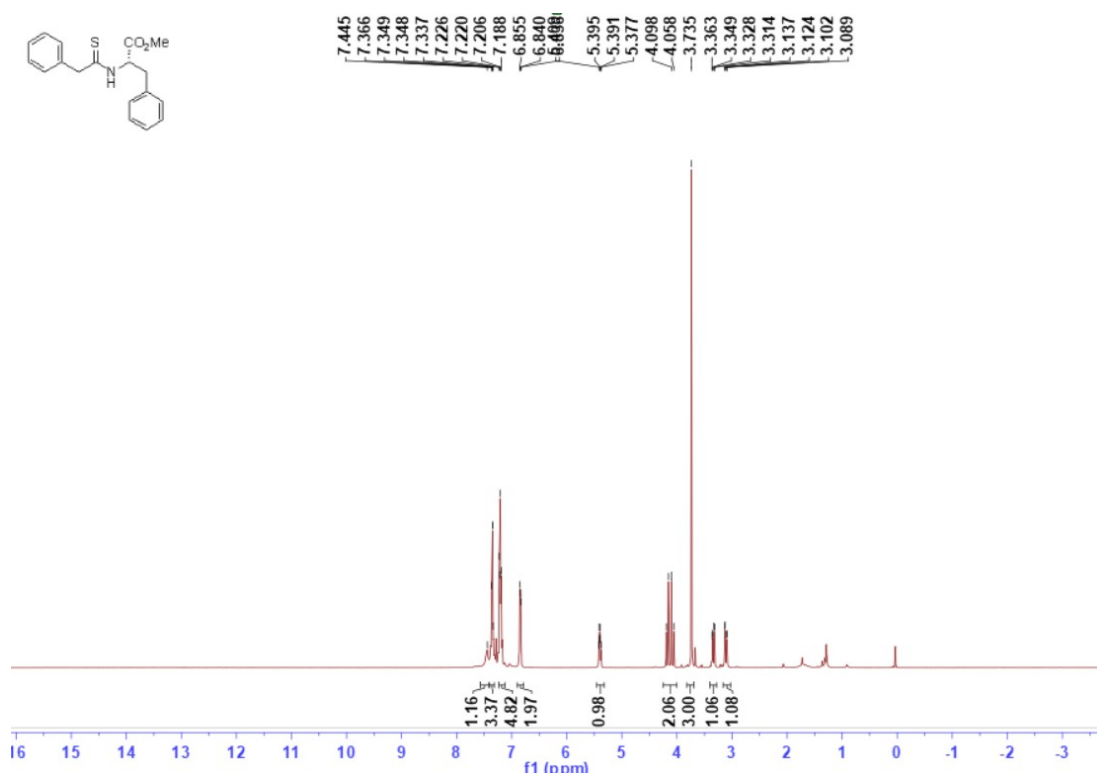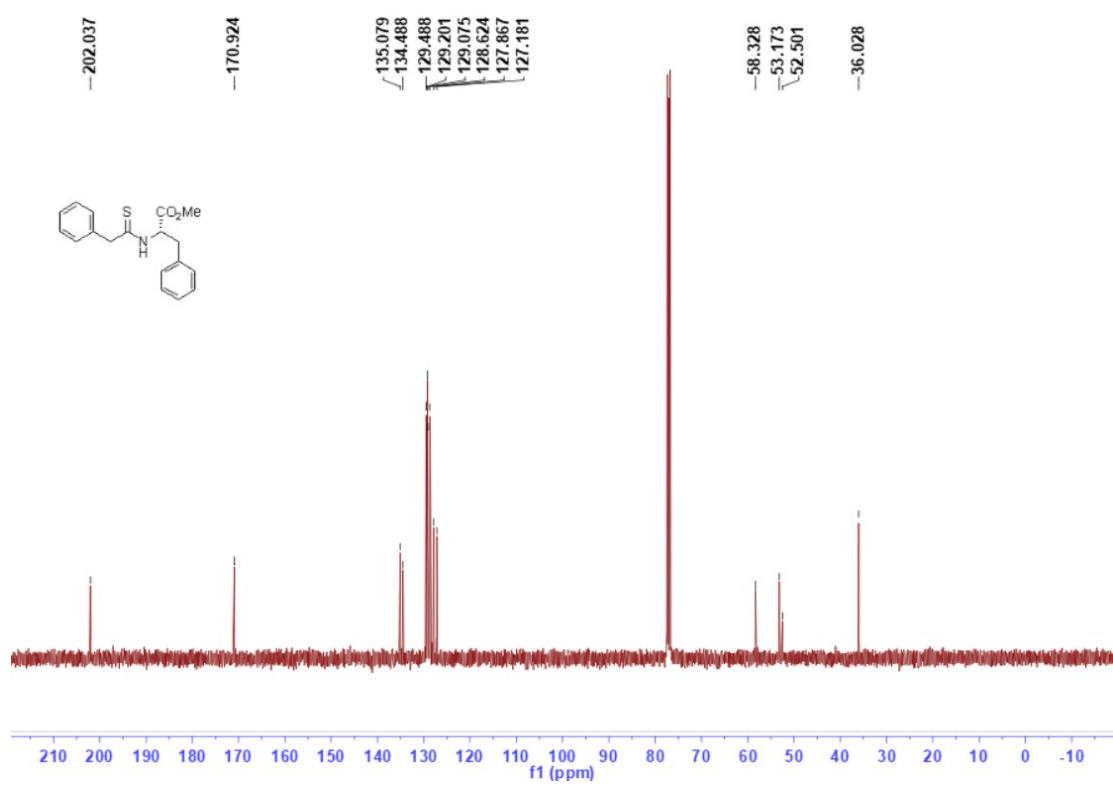



# Methyl (2-phenylethanethioyl)-*D*-tyrosinate (3cd)

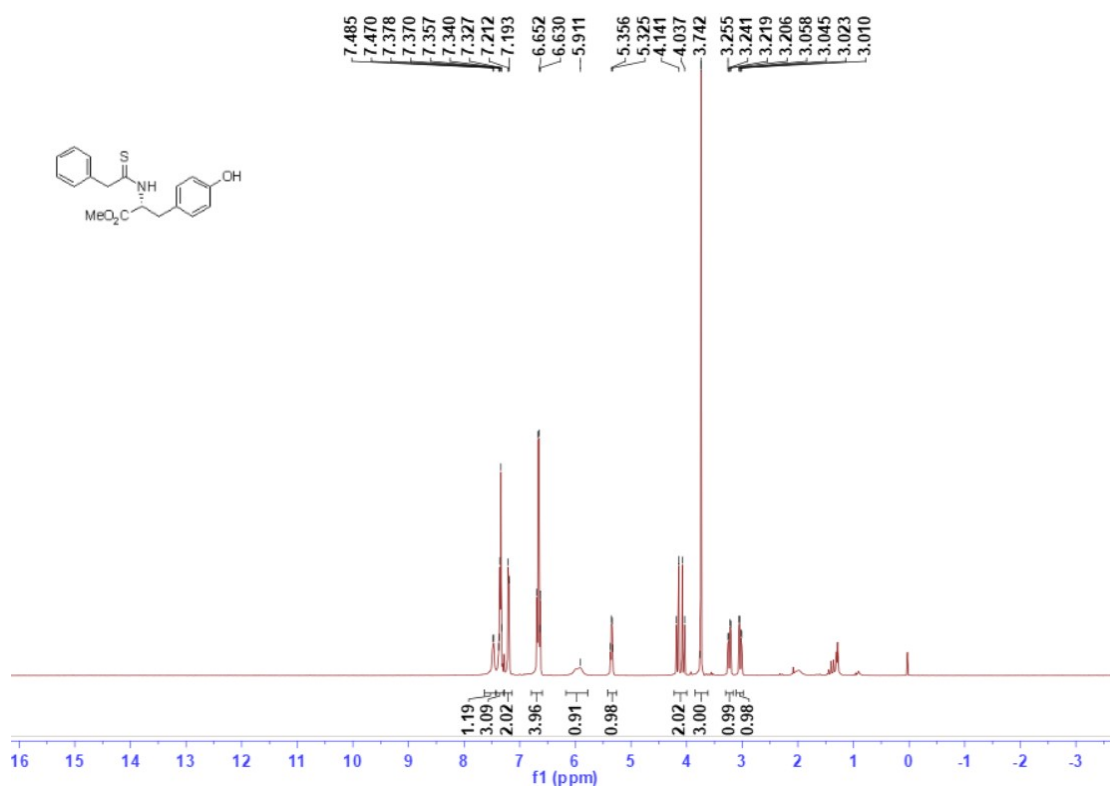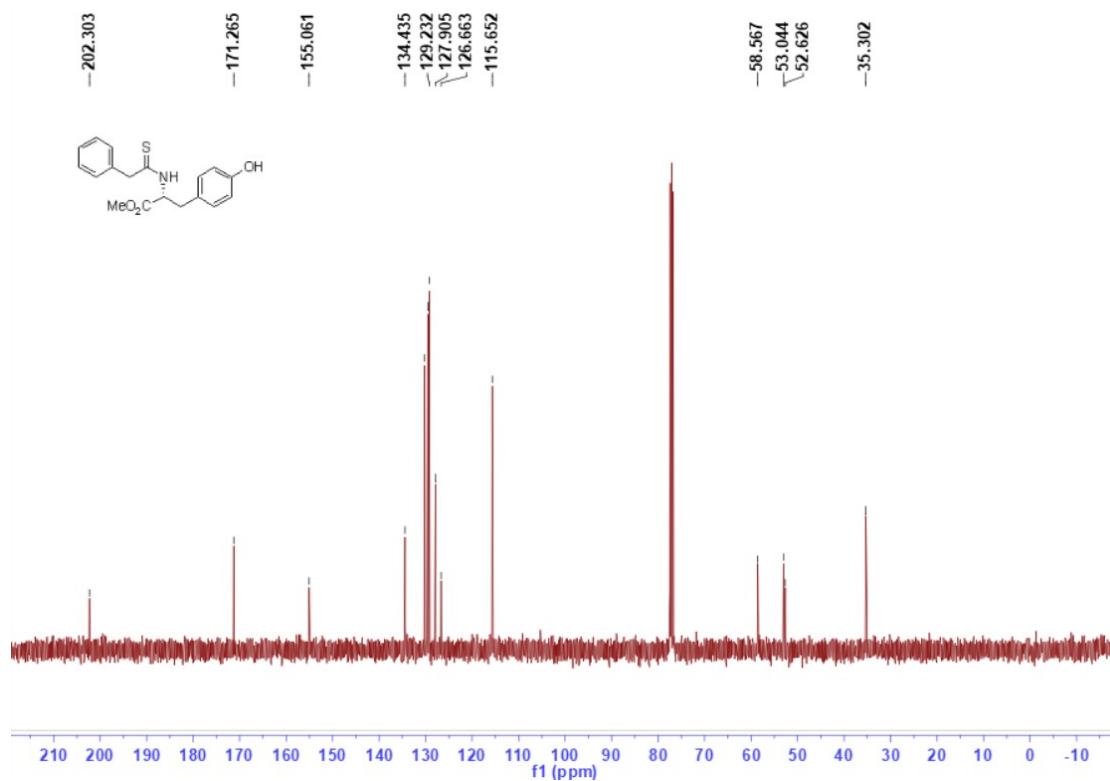

### Methyl (2-phenylethanethioyl)-L-tryptophanate (3ce)

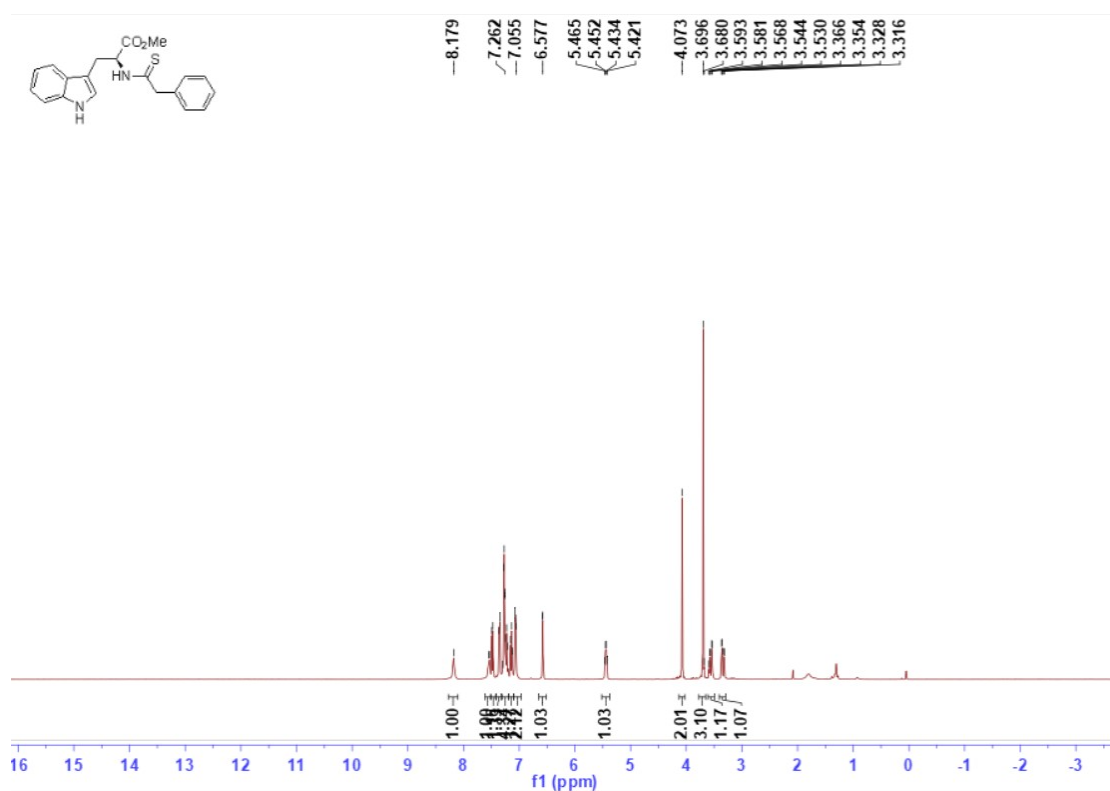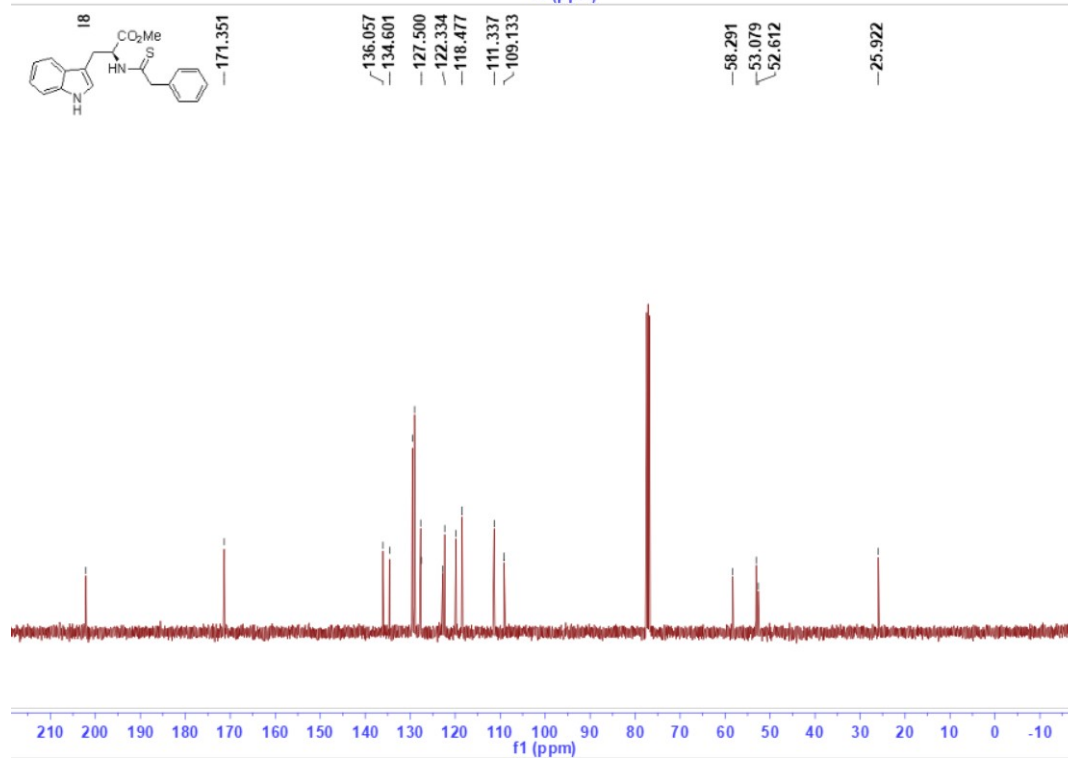

Methyl N2-((benzyloxy)carbonyl)-N6-(2-phenylethanethioyl)-L-lysinate (3cf)

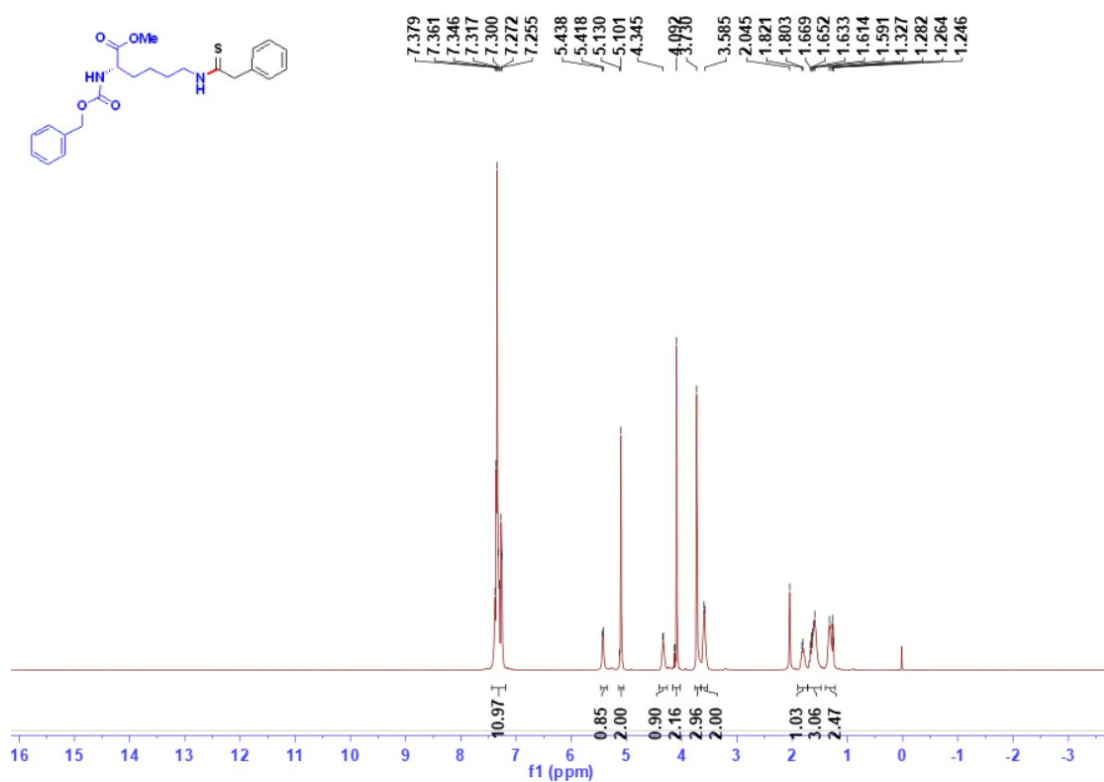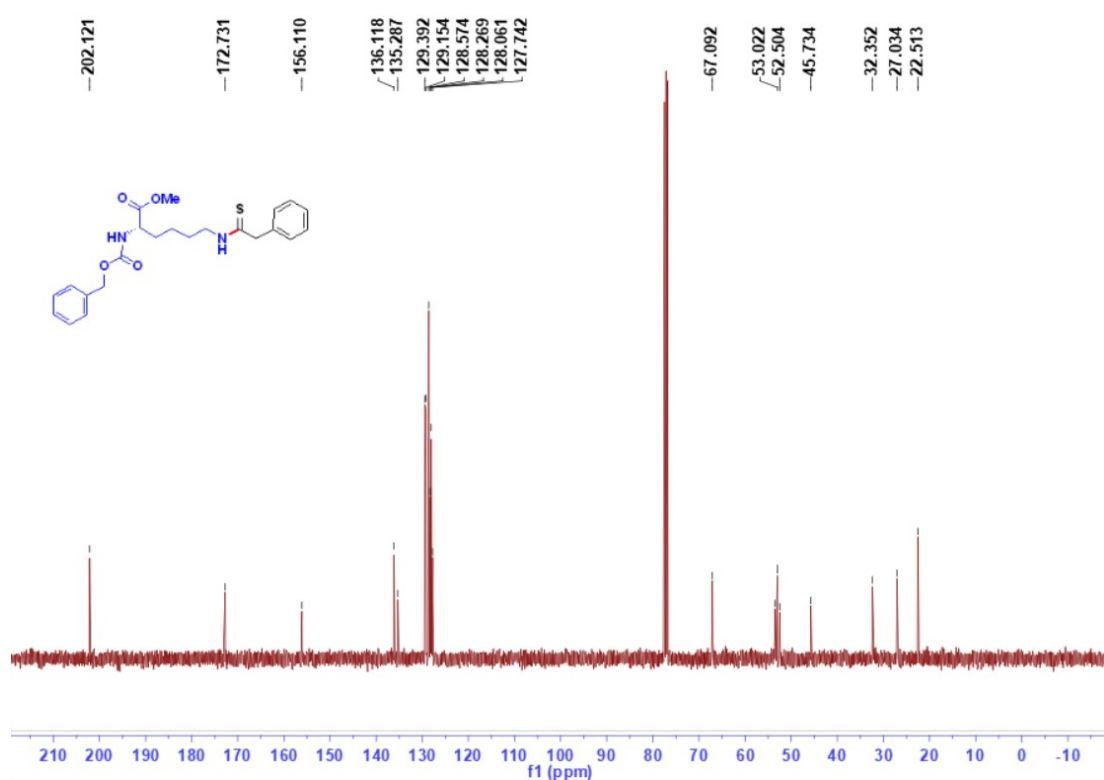

# Ethyl (2-phenylethanethioyl)-L-prolinate (3cg)

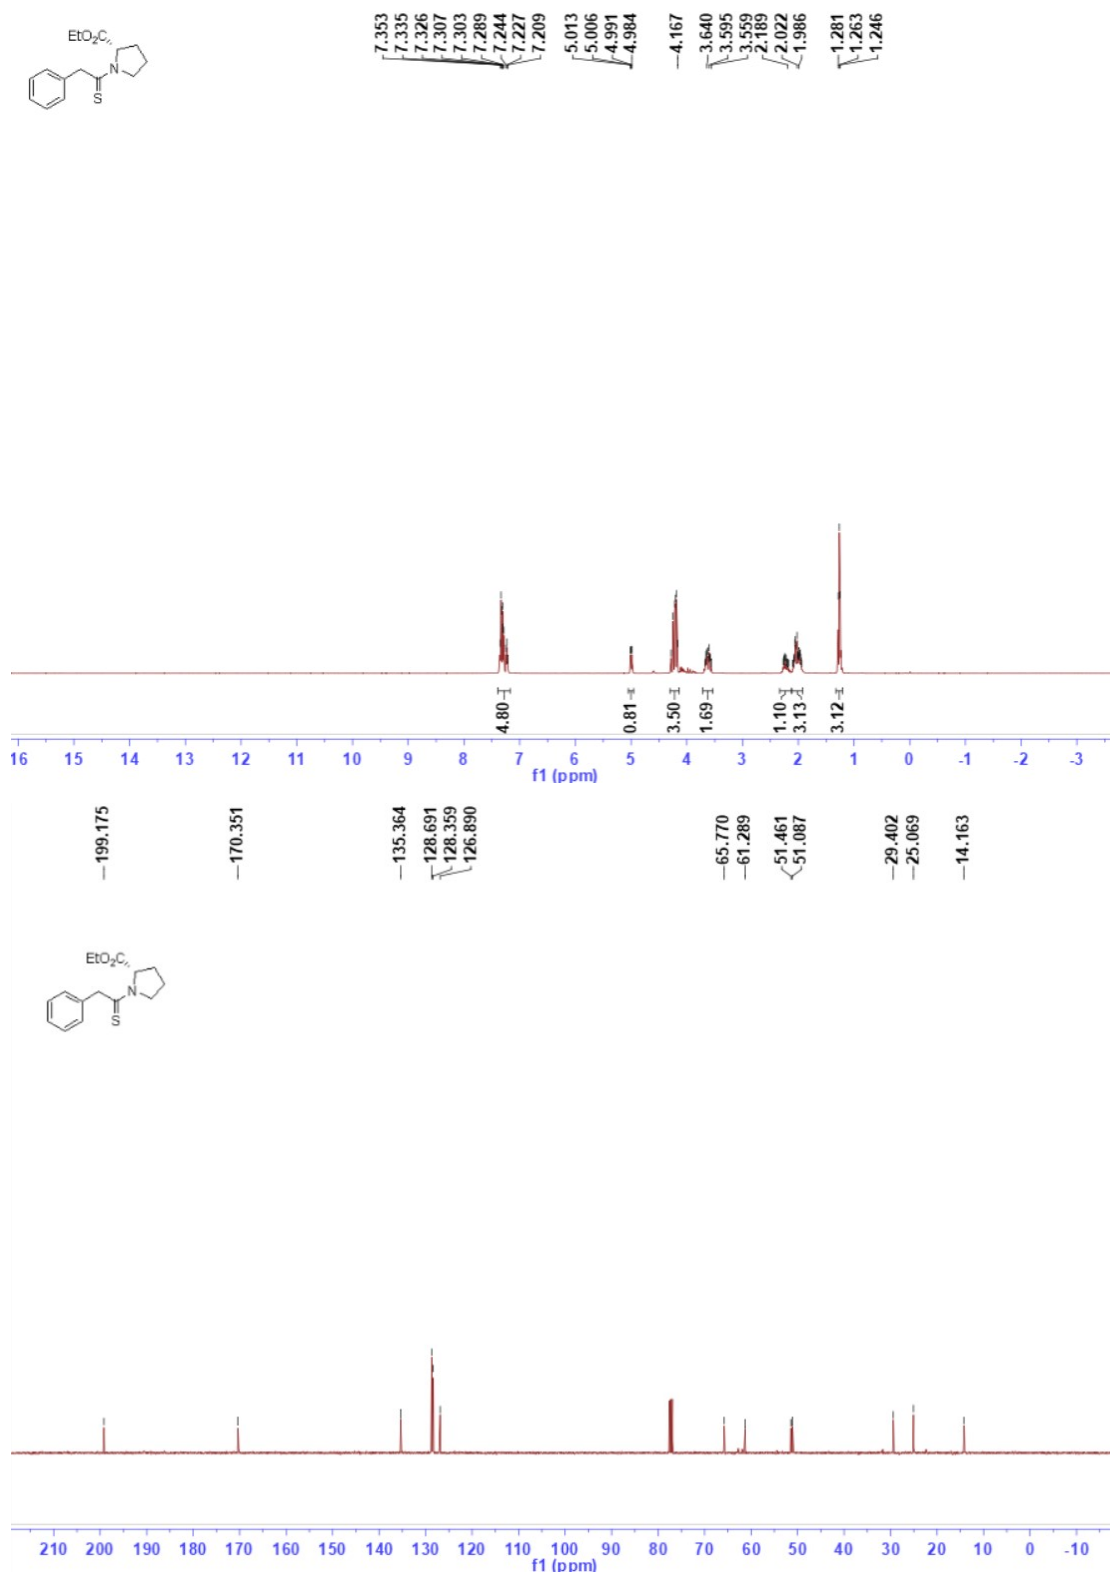

### Aminogluthethimide thiamidation derivative (3da)

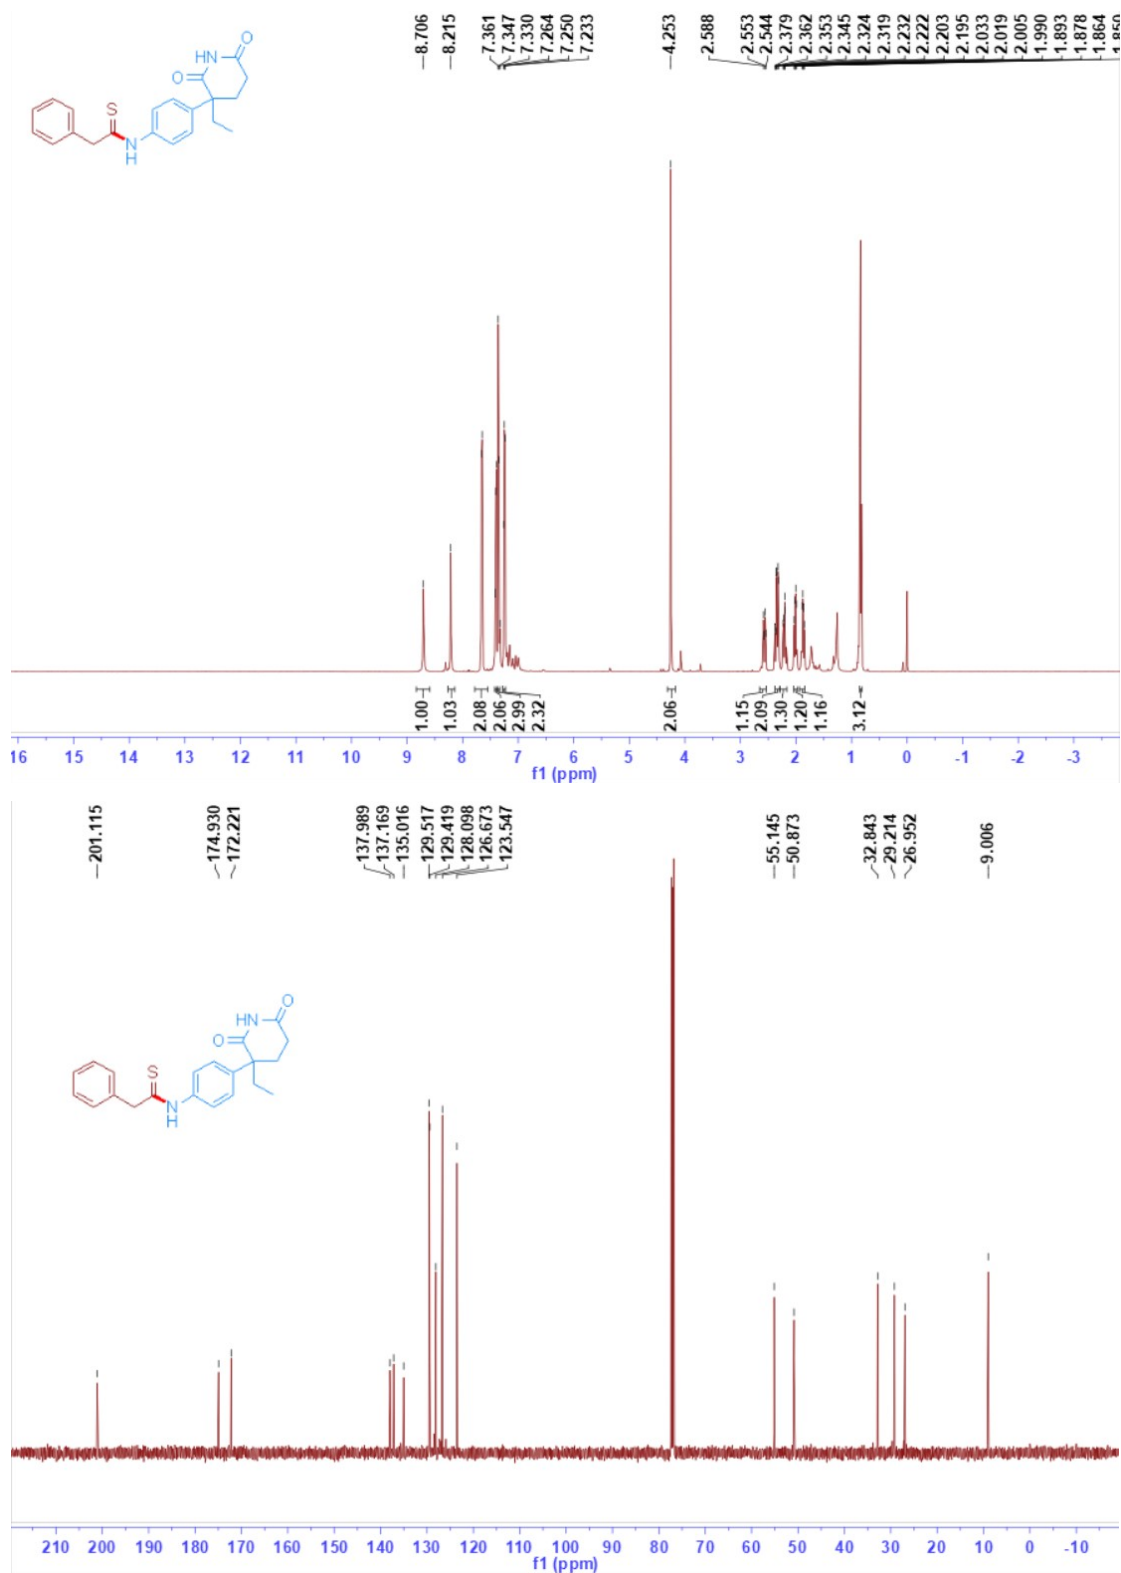

### Ibrutinib intermediate thioamidation (3db)

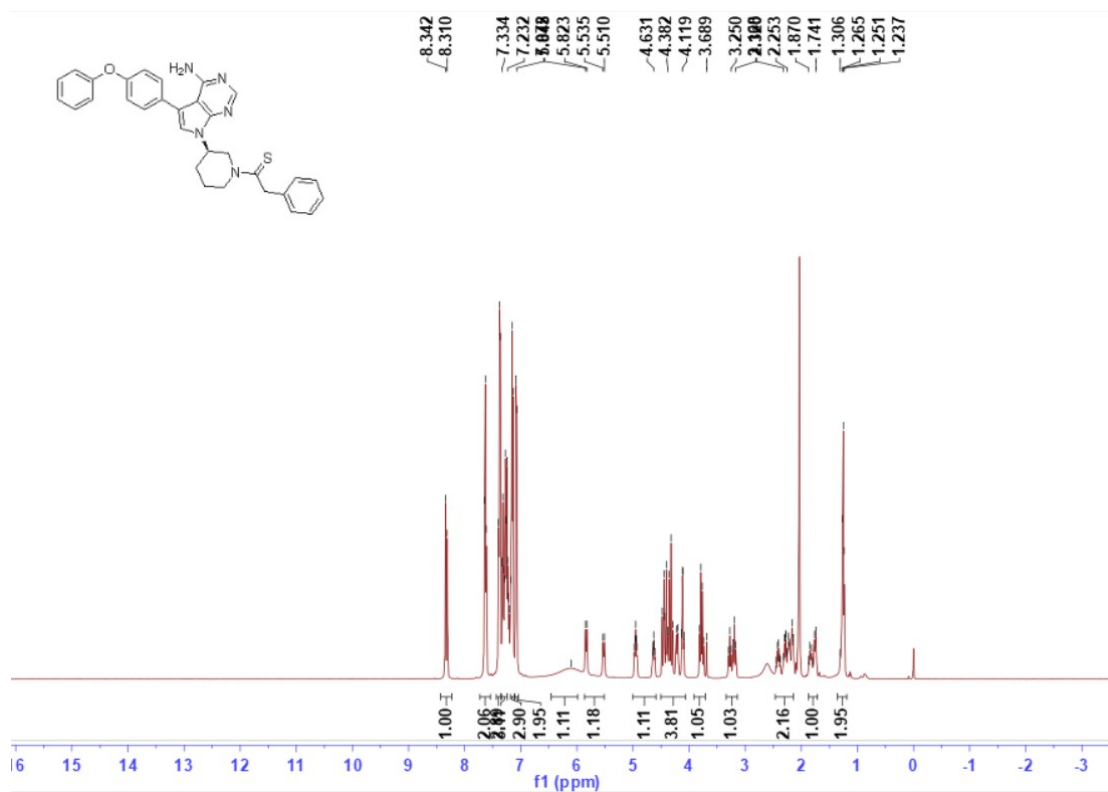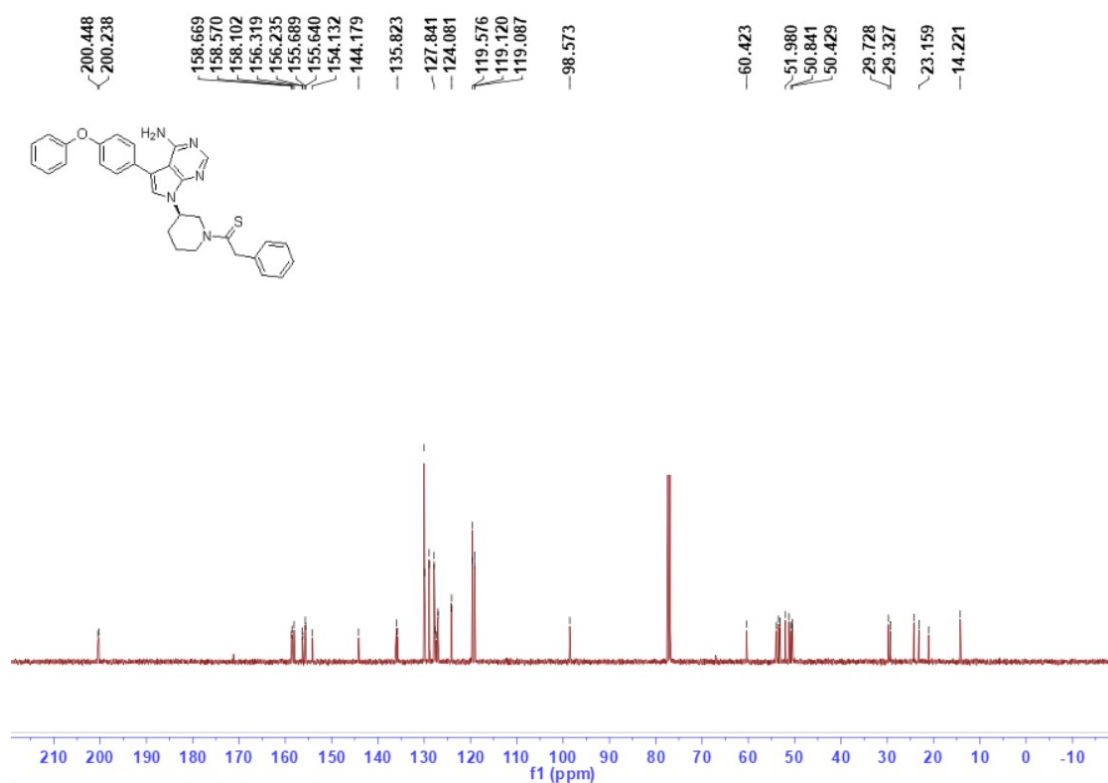

**1-(4-(8-chloro-5,6-dihydro-11H-benzo[5,6]cyclohepta[1,2-b]pyridin-11-ylidene)piperidin-1-yl)-2-phenylethane-1-thione (3dc)**

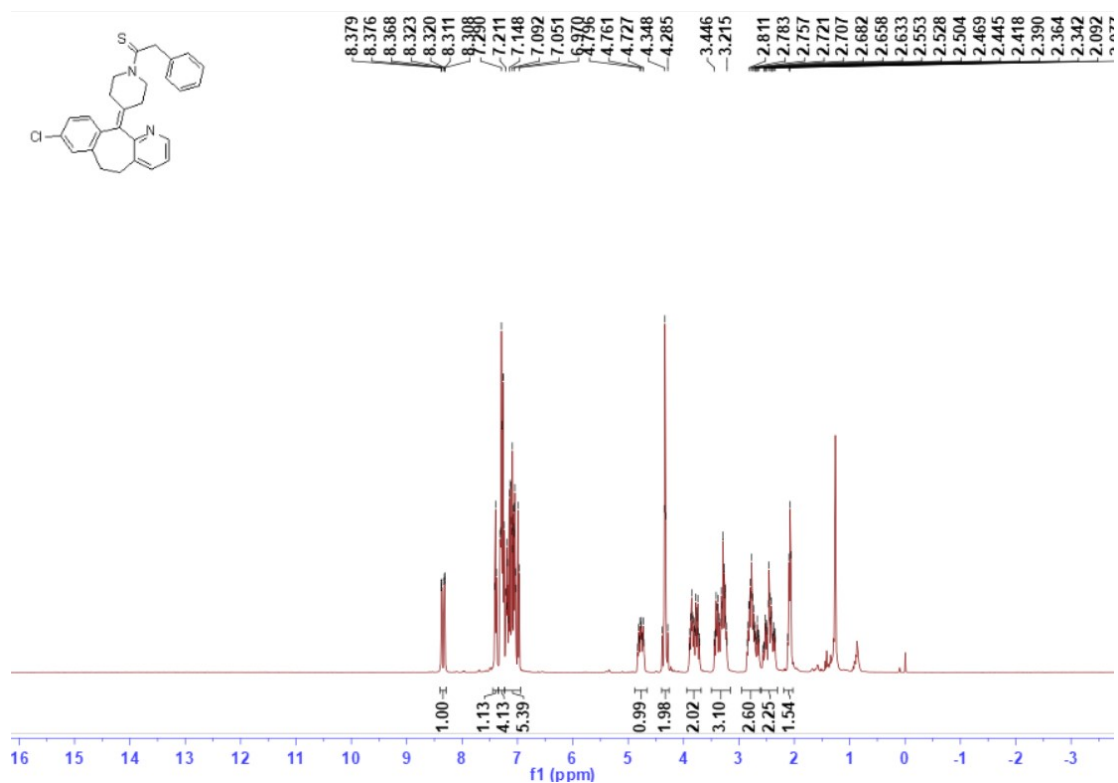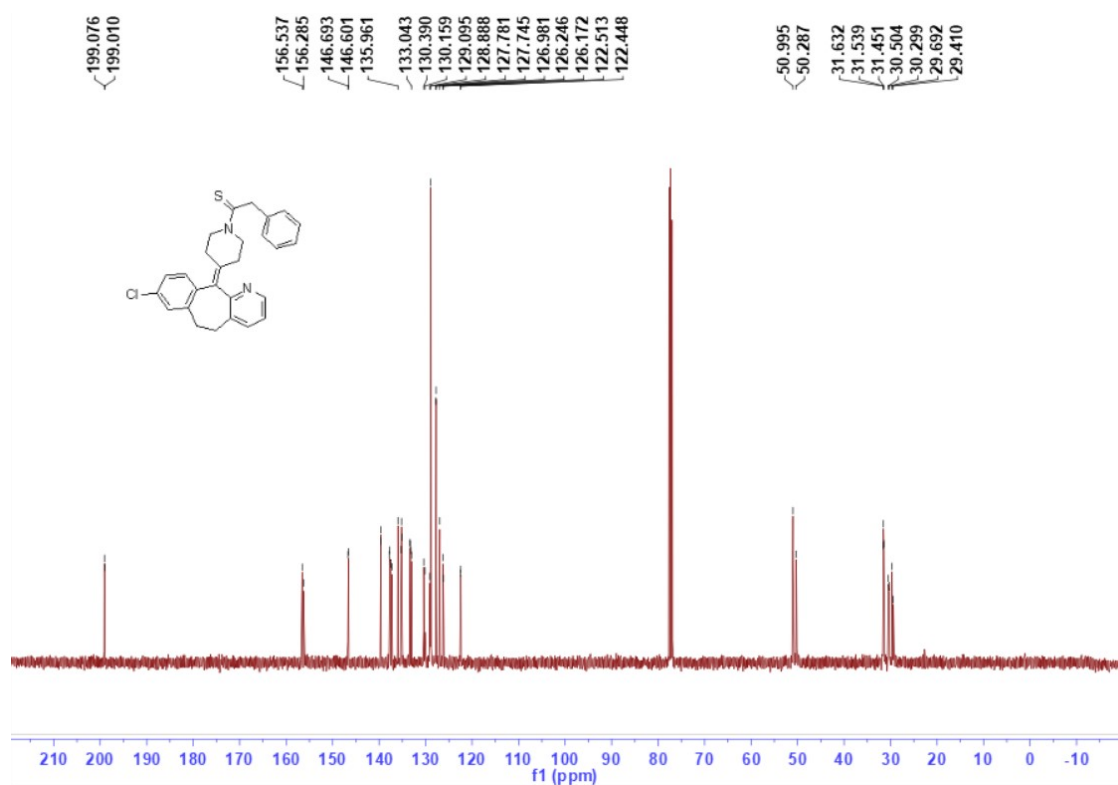

**5,6-Dimethoxy-2-((1-(2-phenylethanethiyl)piperidin-4-yl)methyl)-2,3-dihydro-1H-inden-1-one (3dd)**

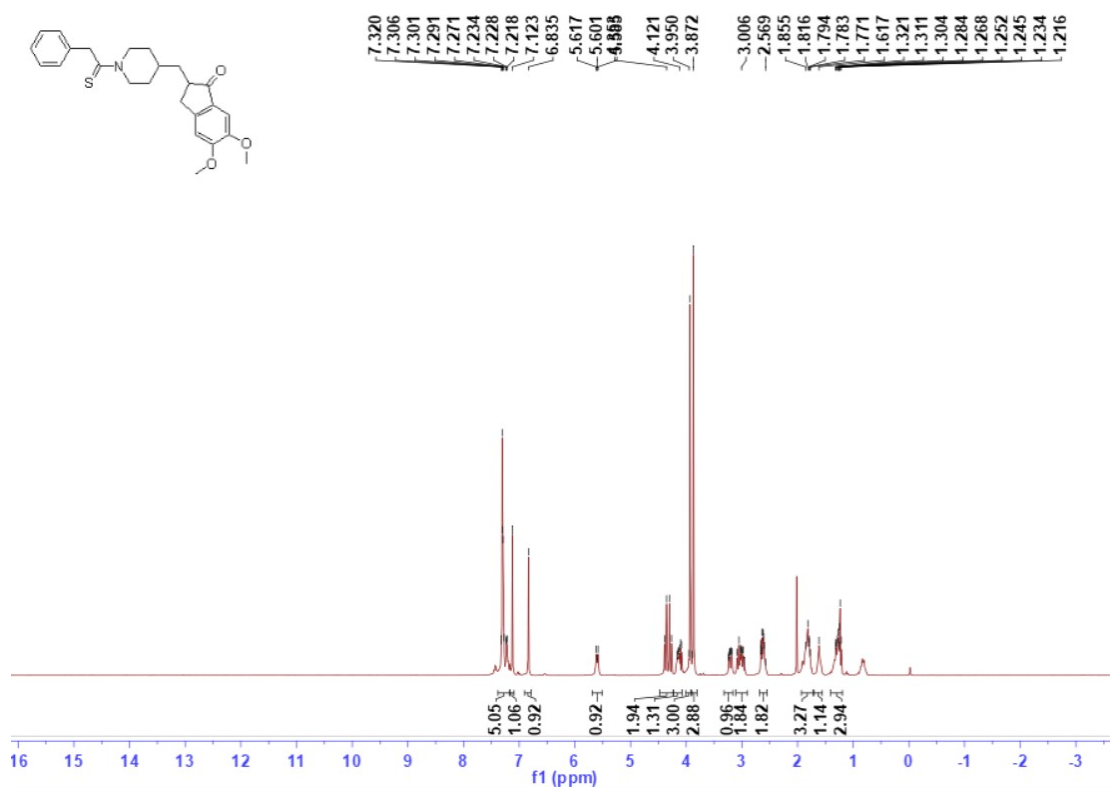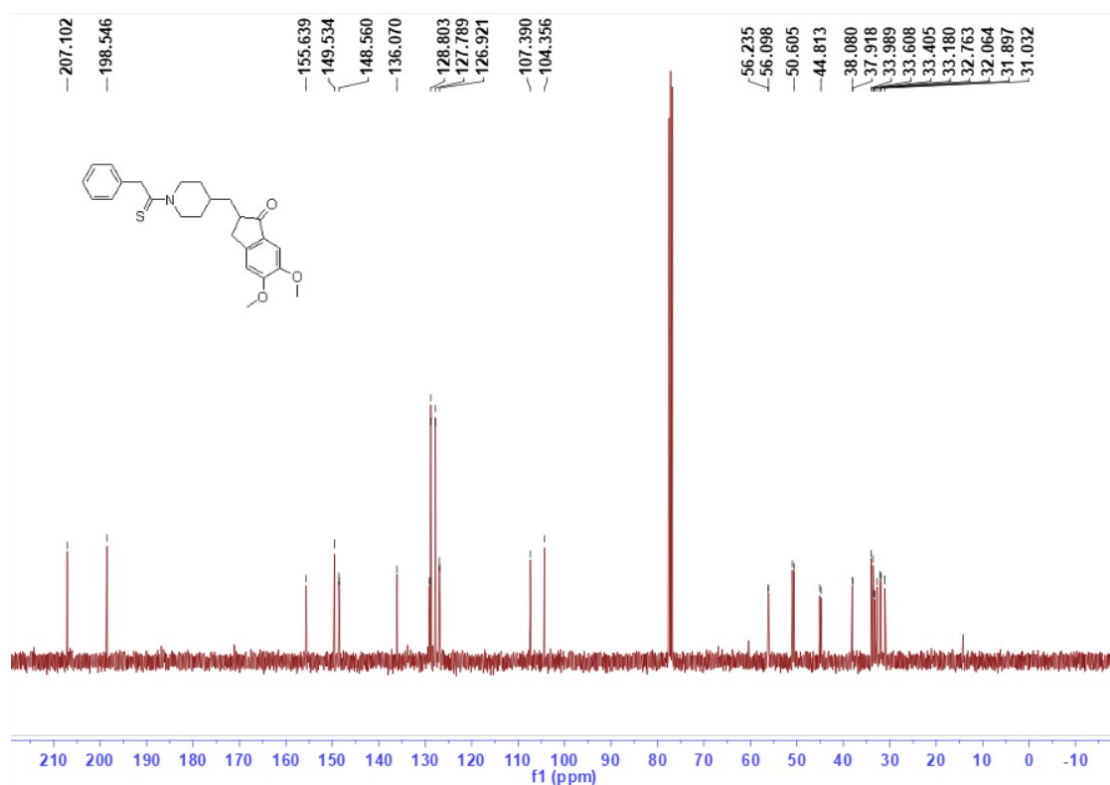



***N*-methyl-2-phenyl-*N*-(3-phenyl-3-(4-(trifluoromethyl)phenoxy)propyl)ethanethioamide (3de)**

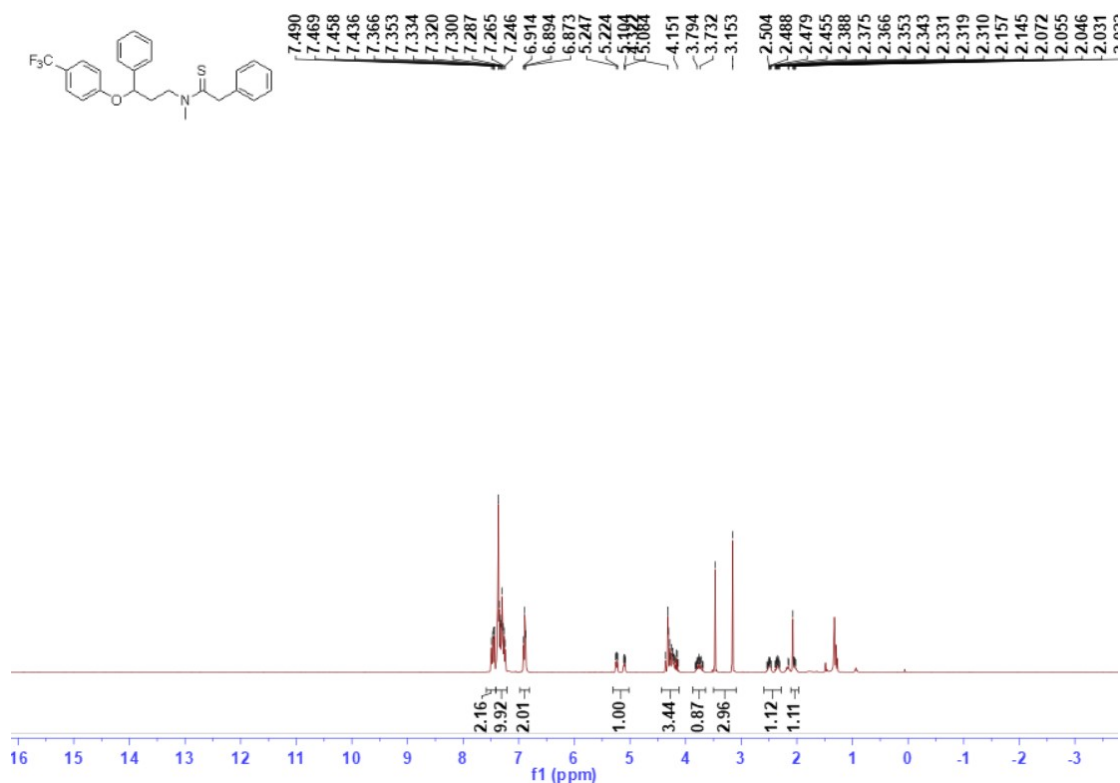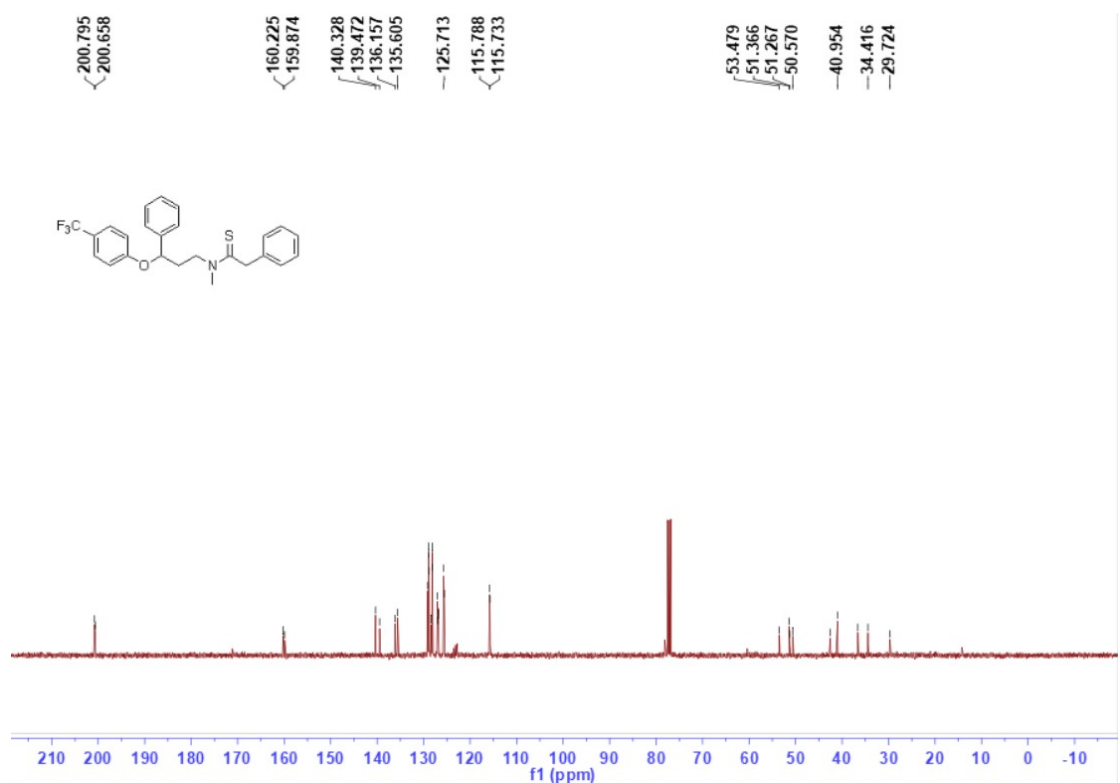

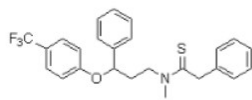

61.456  
61.518

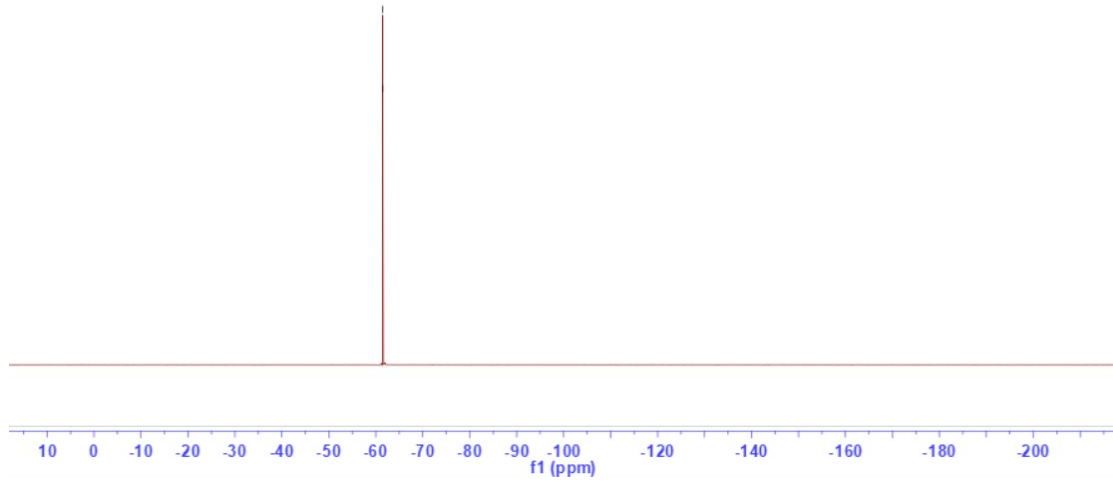

**Ethyl-(*R*)-2''-(1-(2-phenylethanothioamido)ethyl)-[2,4':2',4''-terthiazole]-4-carboxylate (3df)**

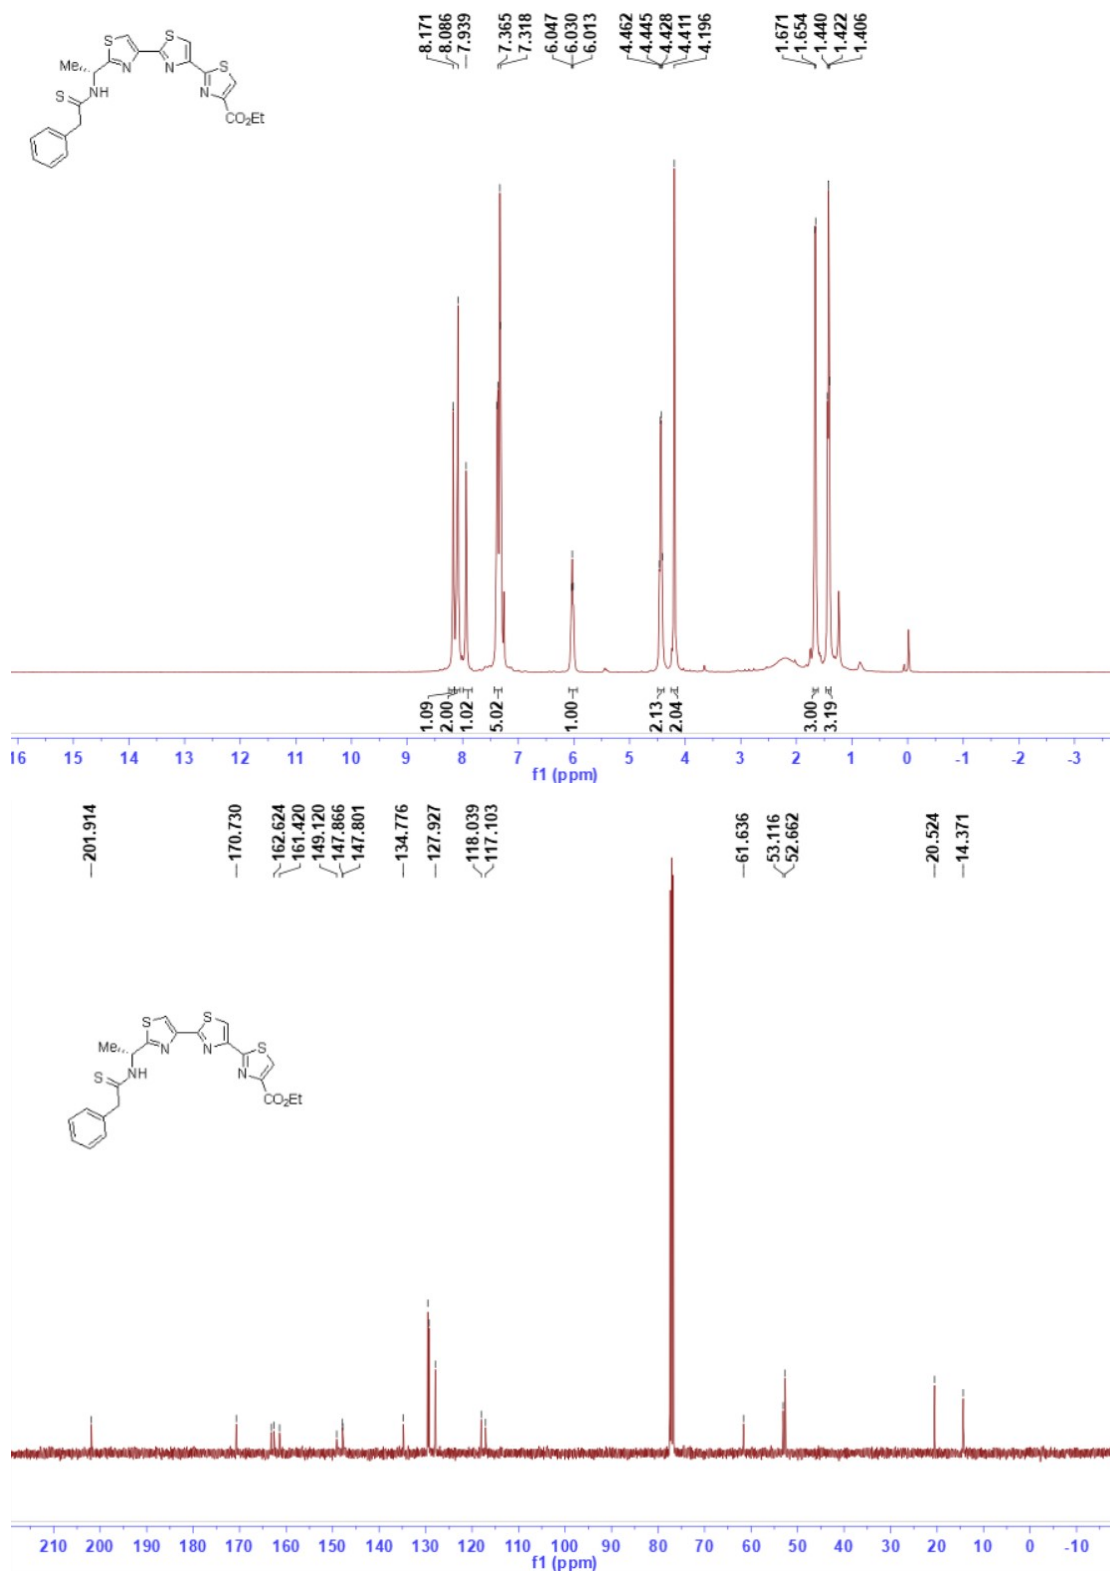

### CbzHN-Lys-Val-OMe thioamide derivatives (3dg)

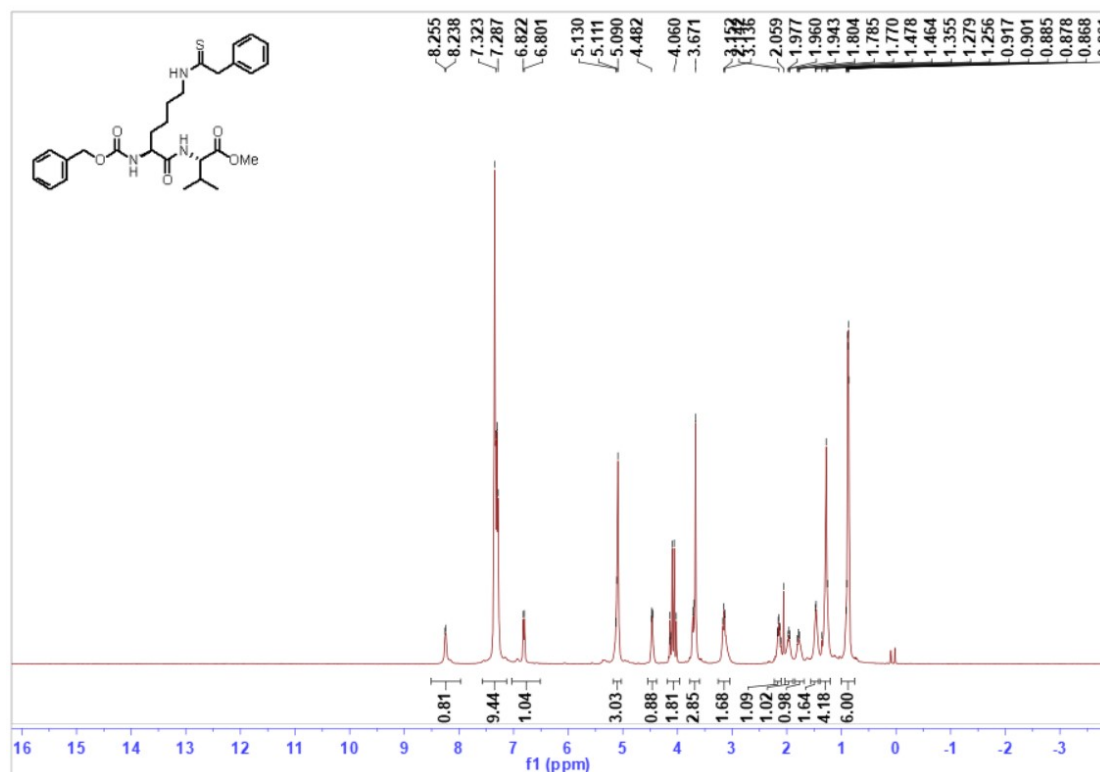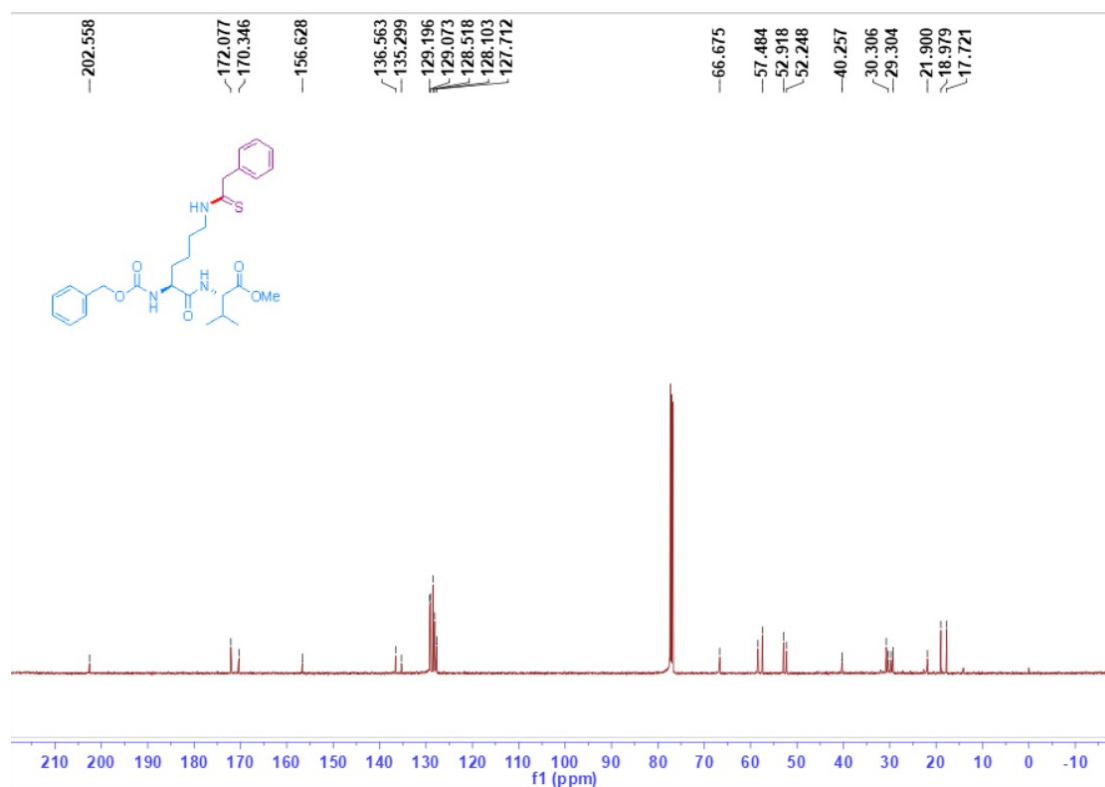

***N***-2-(diphenylphosphanyl)benzyl)-2-phenylethanethioamide (3dh)

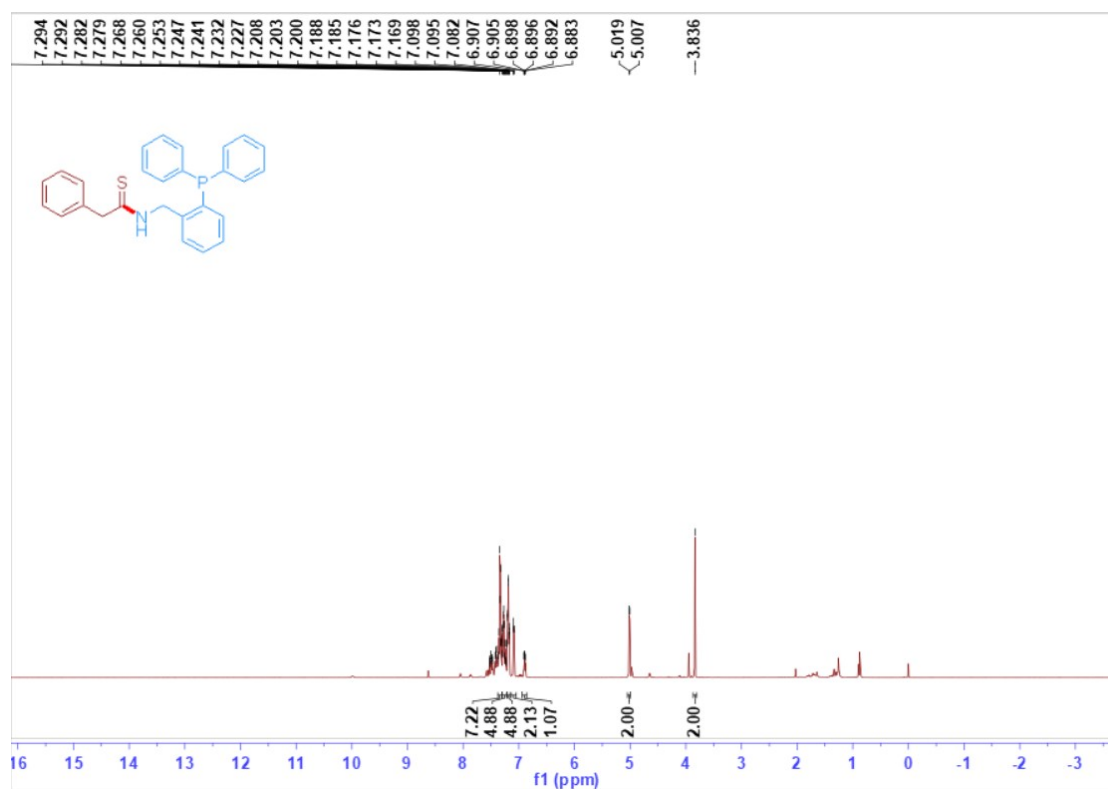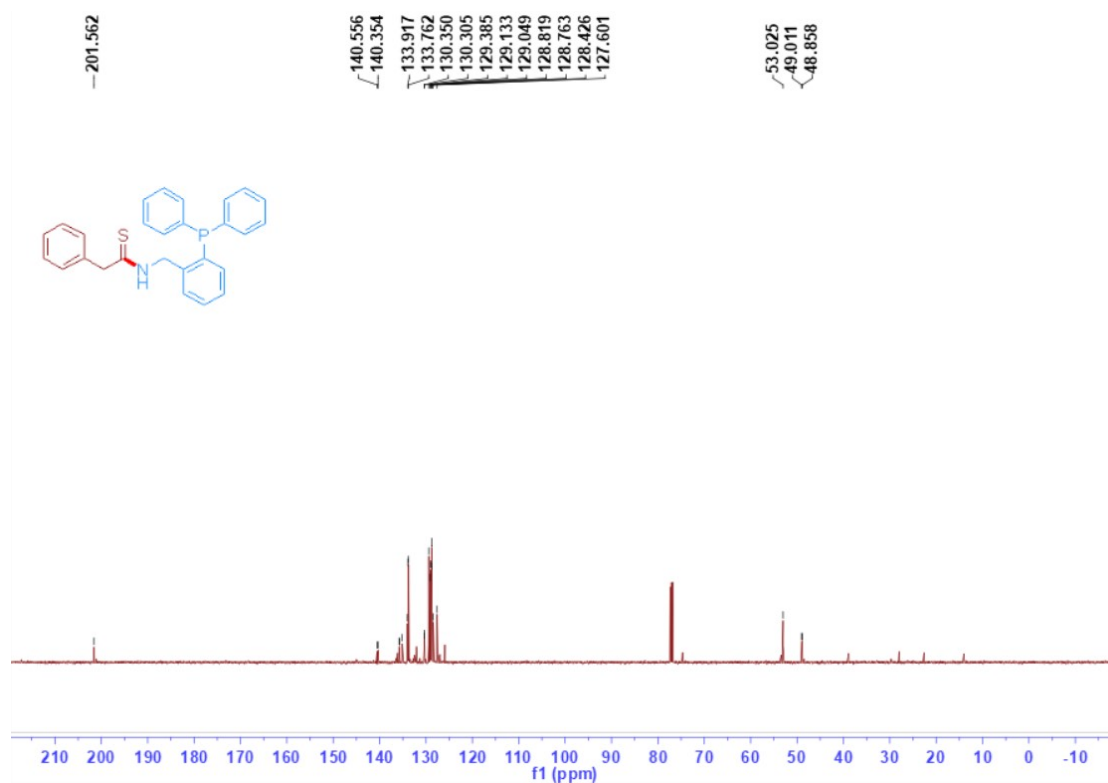

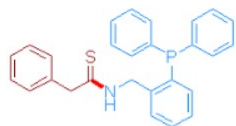

---15.530

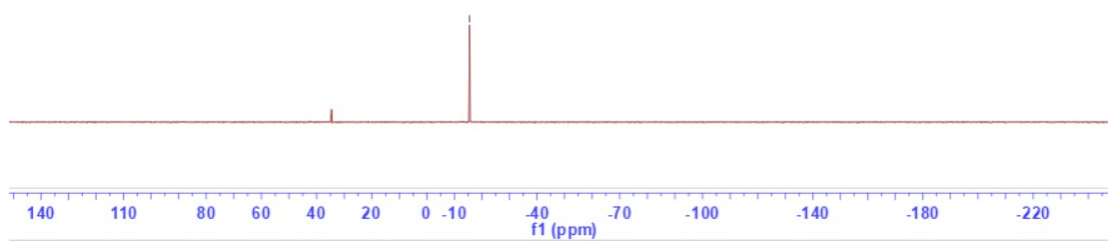

2-Phenyl-N-((R)-quinolin-4-yl((1S,2R,4S,5R)-5-vinylquinuclidin-2-yl)methyl)ethanethioamide (3di)

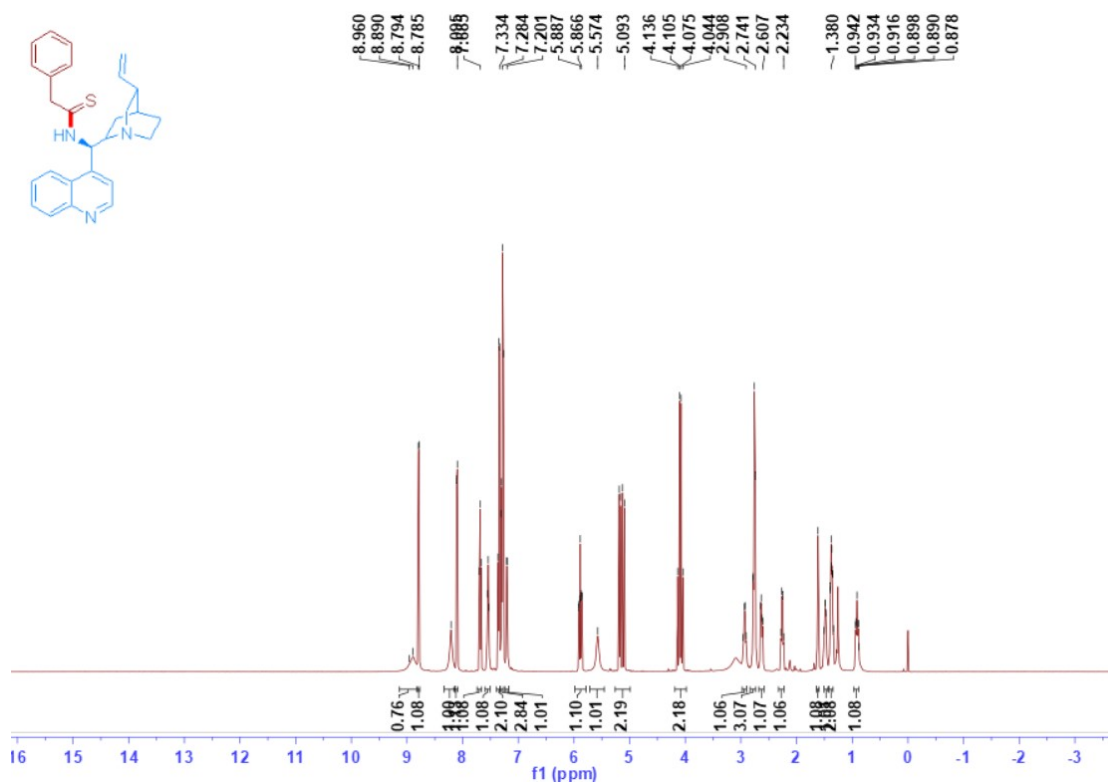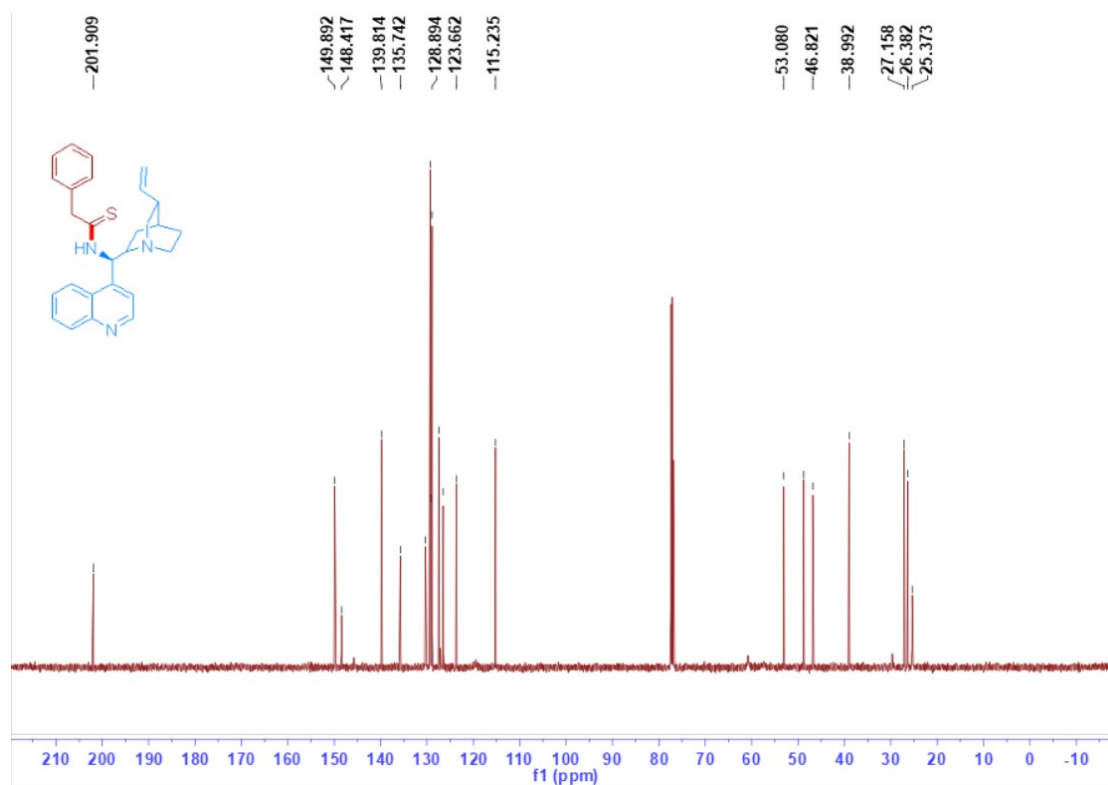

***N*-methyl-*N*-phenyl-2-(*p*-tolyl)ethanethioamide (3ea)**

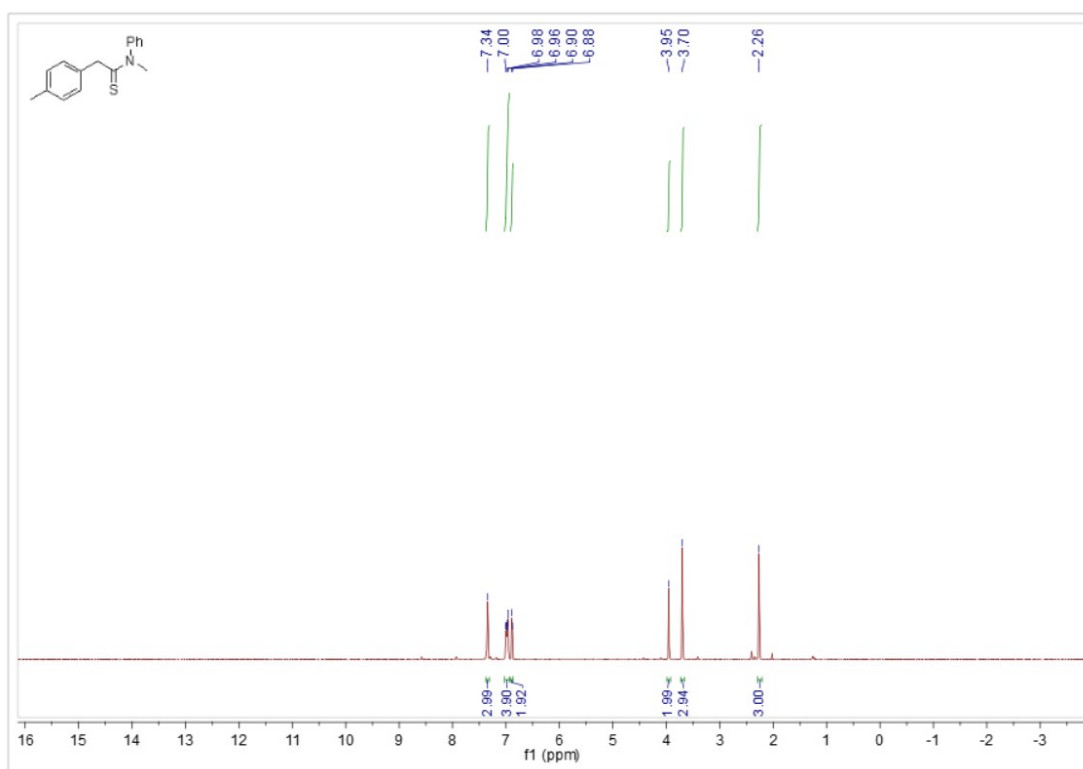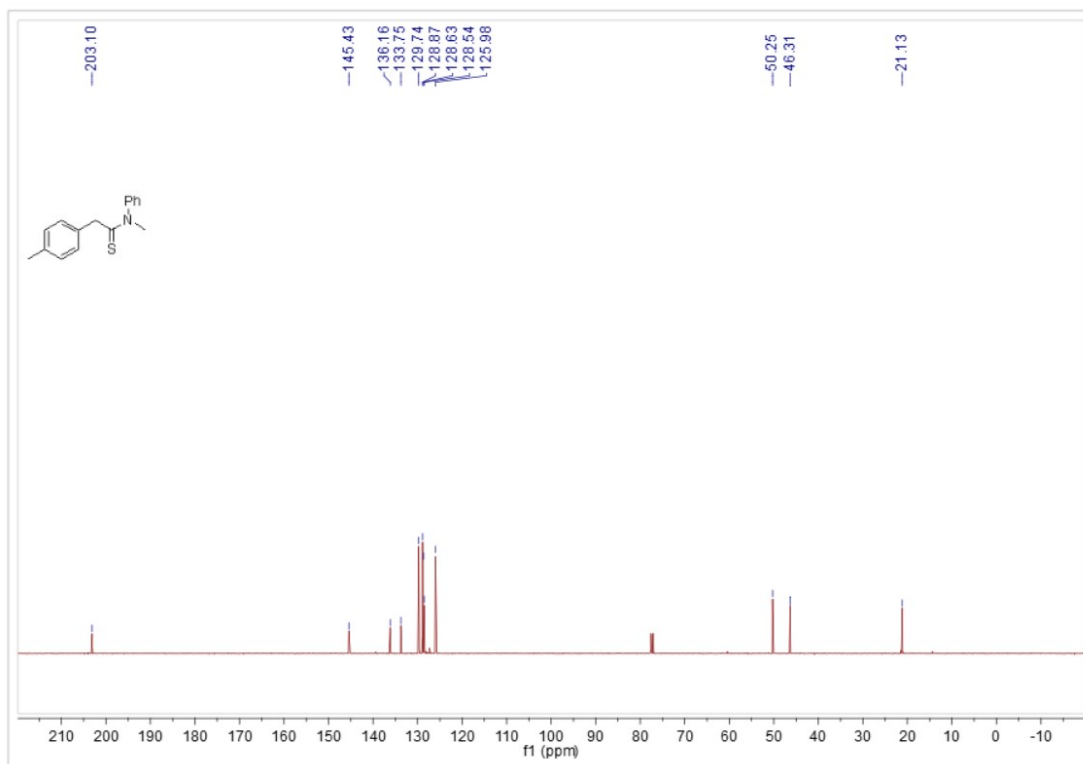



## 2-(4-Methoxyphenyl)-*N*-methyl-*N*-phenylethanethioamide (3eb)

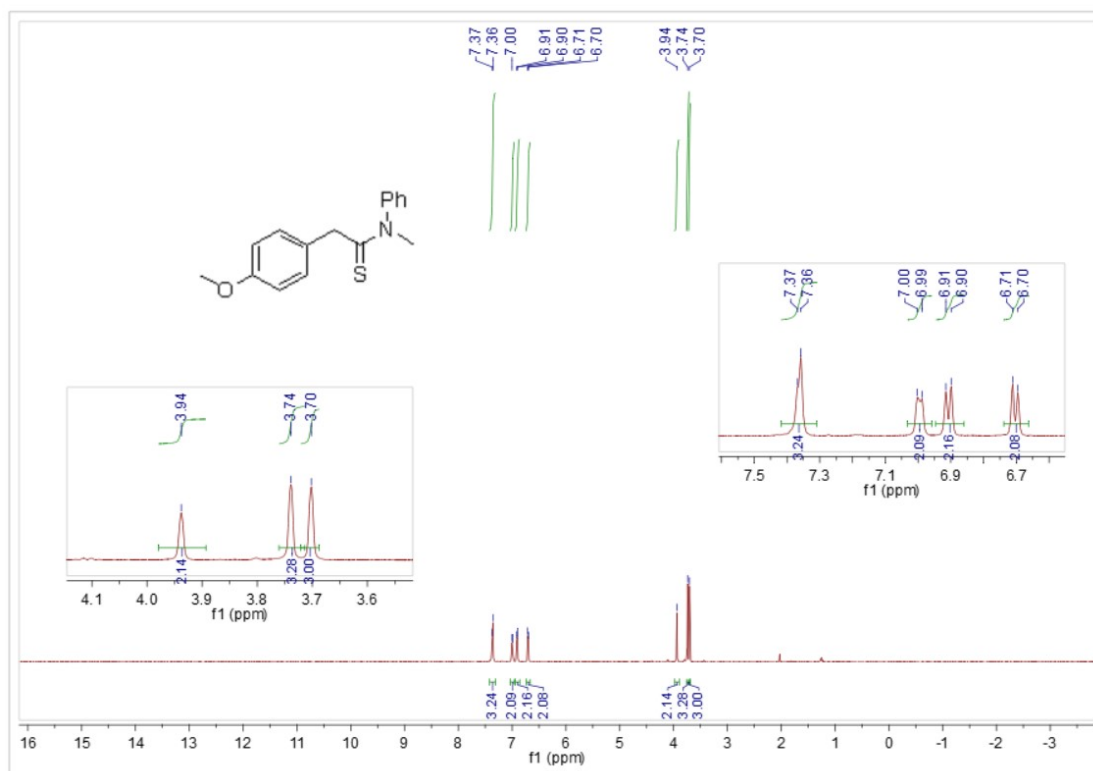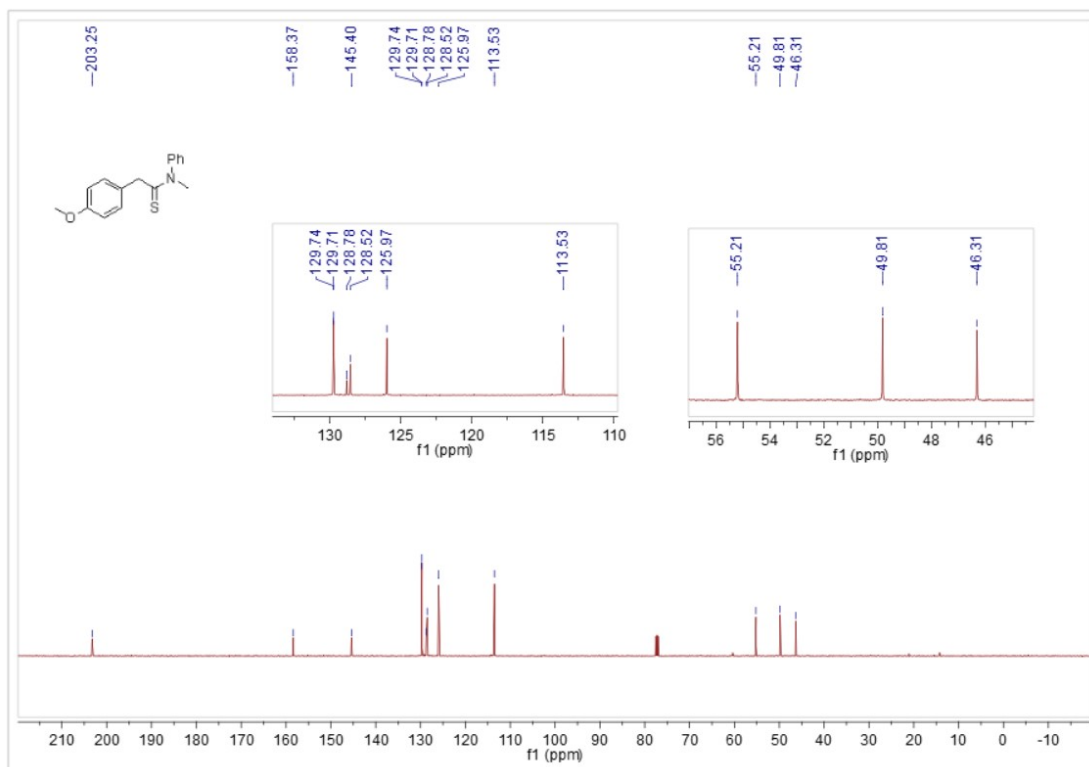

## 2-(4-Chlorophenyl)-*N*-methyl-*N*-phenylethanethioamide (3ec)

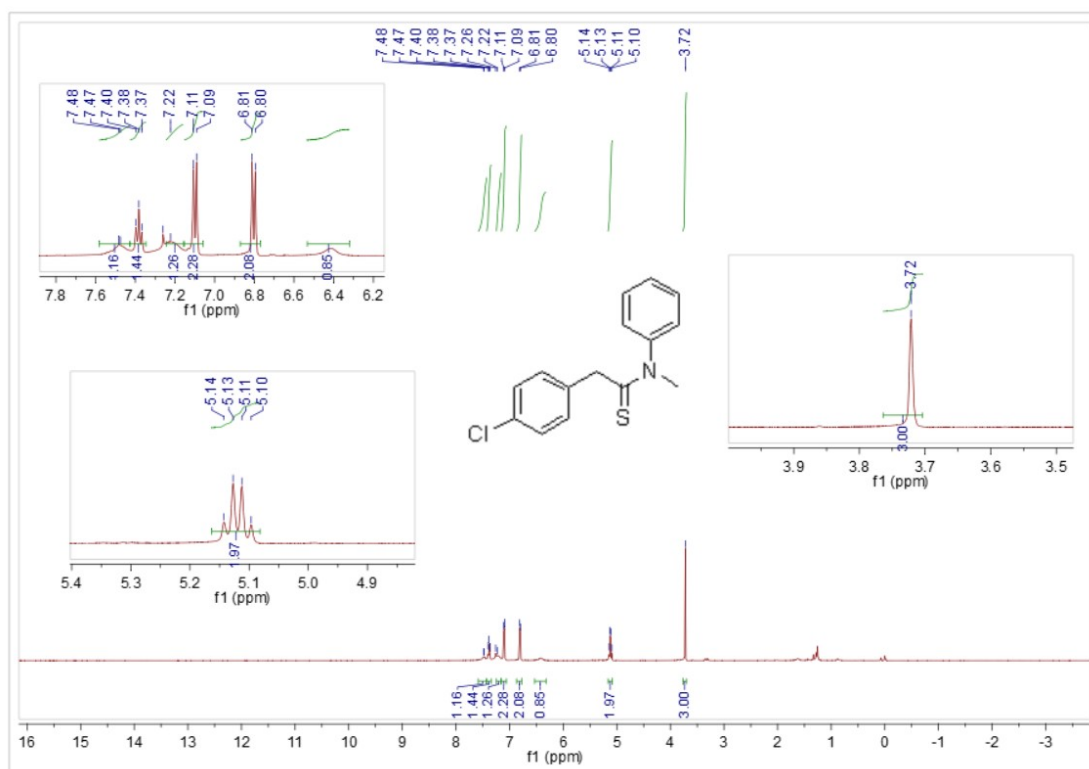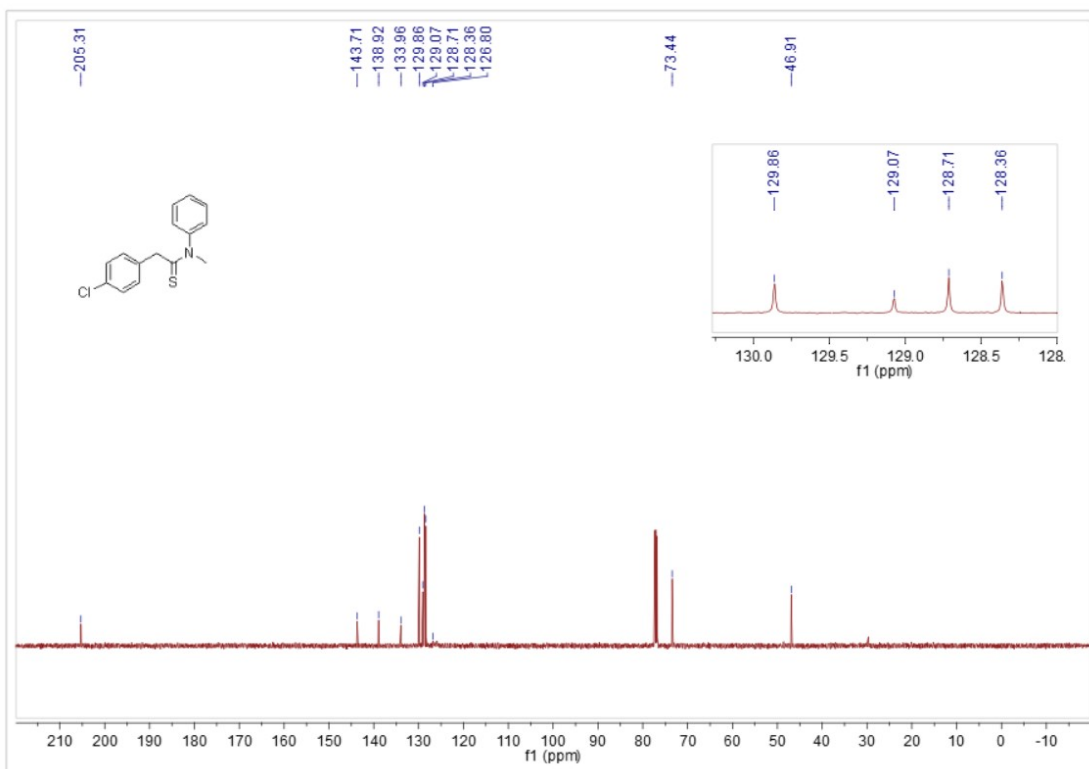

## 2-(4-Bromophenyl)-*N*-methyl-*N*-phenylethanethioamide (3ed)

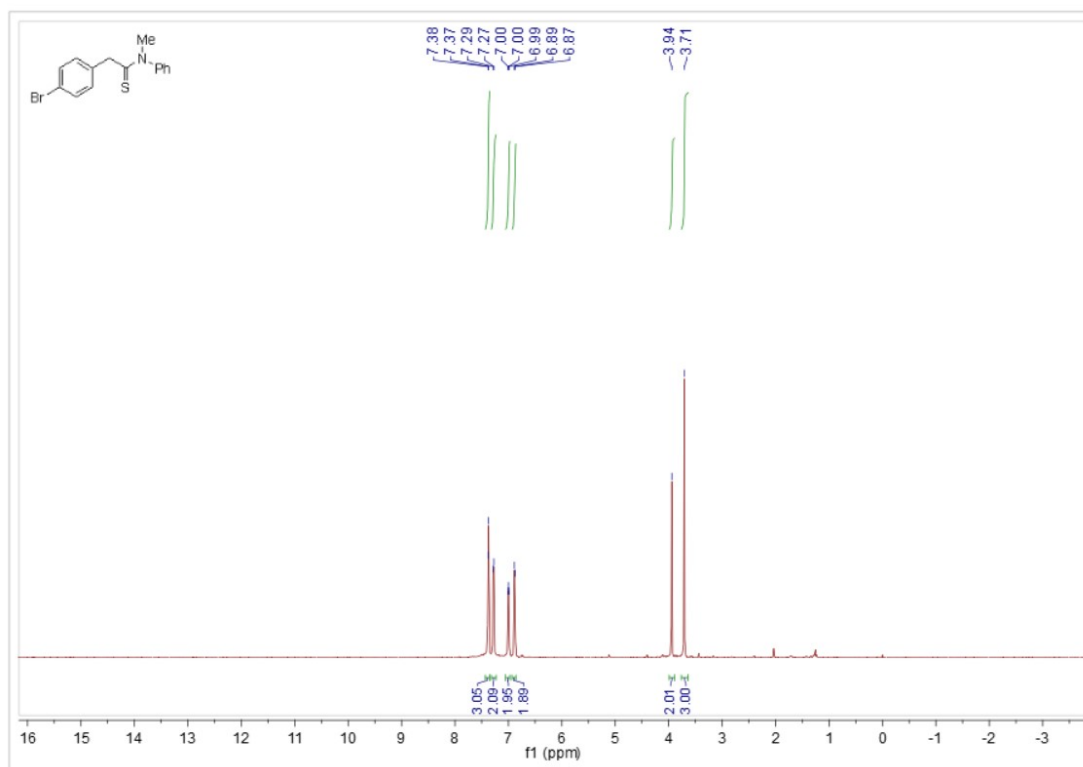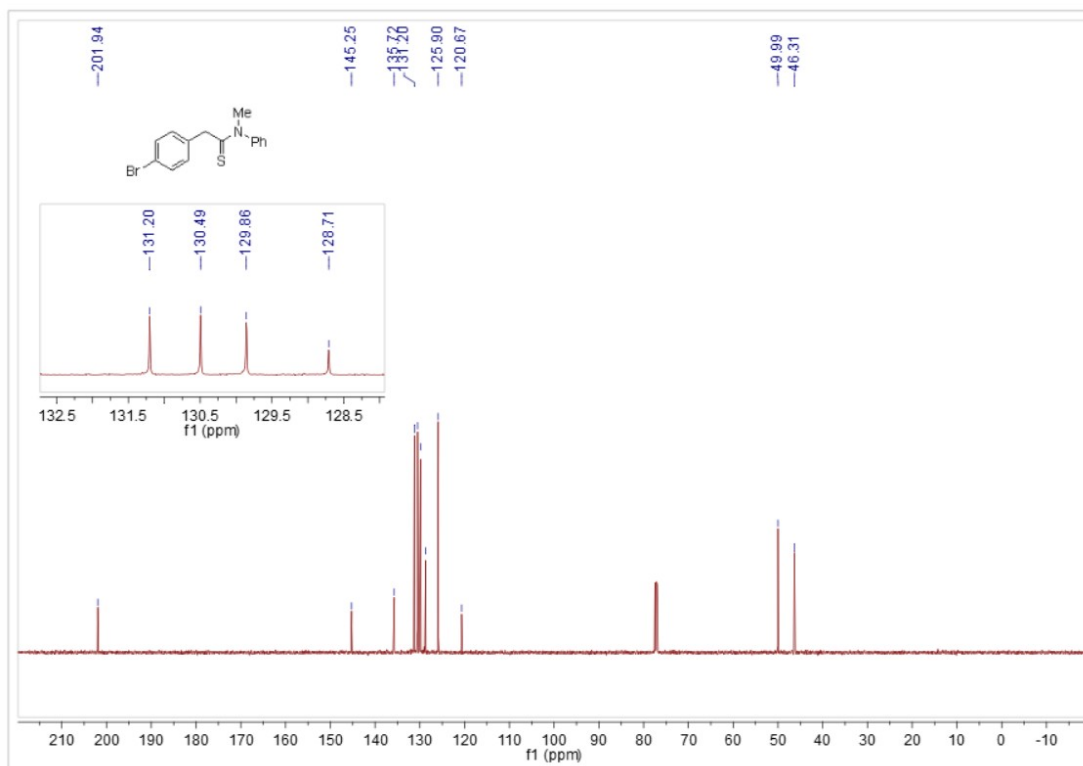

## 2-(4-Cyanophenyl)-N-methyl-N-phenylethanoamide (3ee)

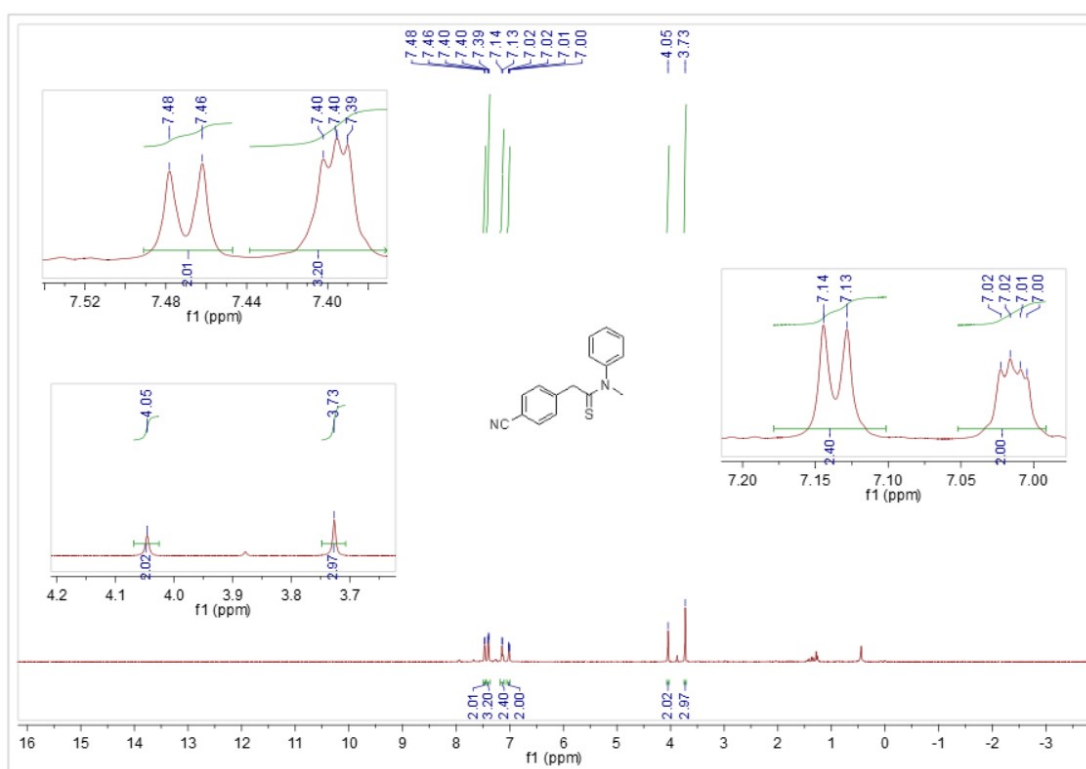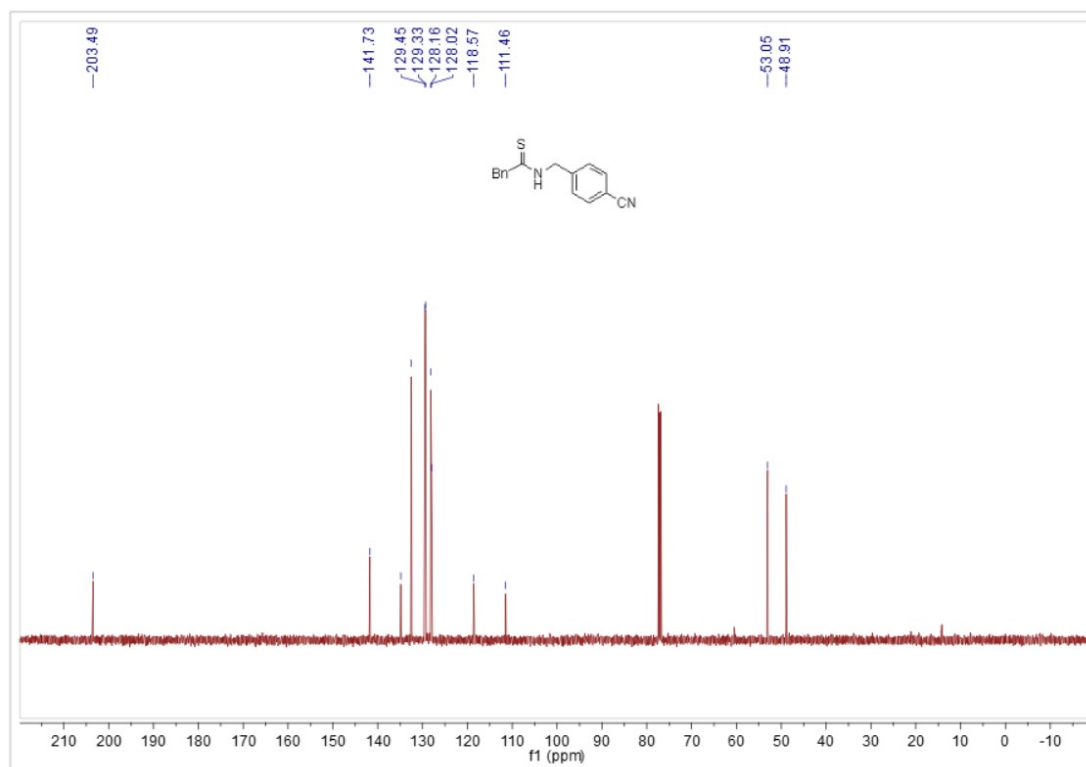

## 2-(3-Fluorophenyl)-*N*-methyl-*N*-phenylethanethioamide (3ef)

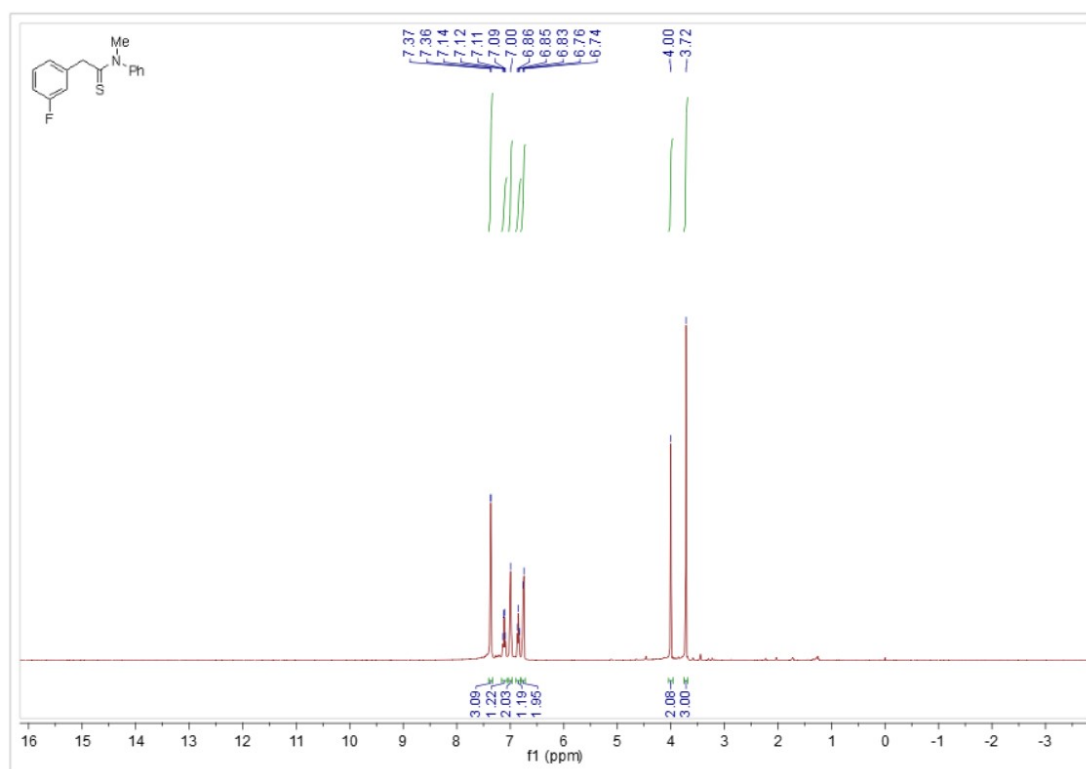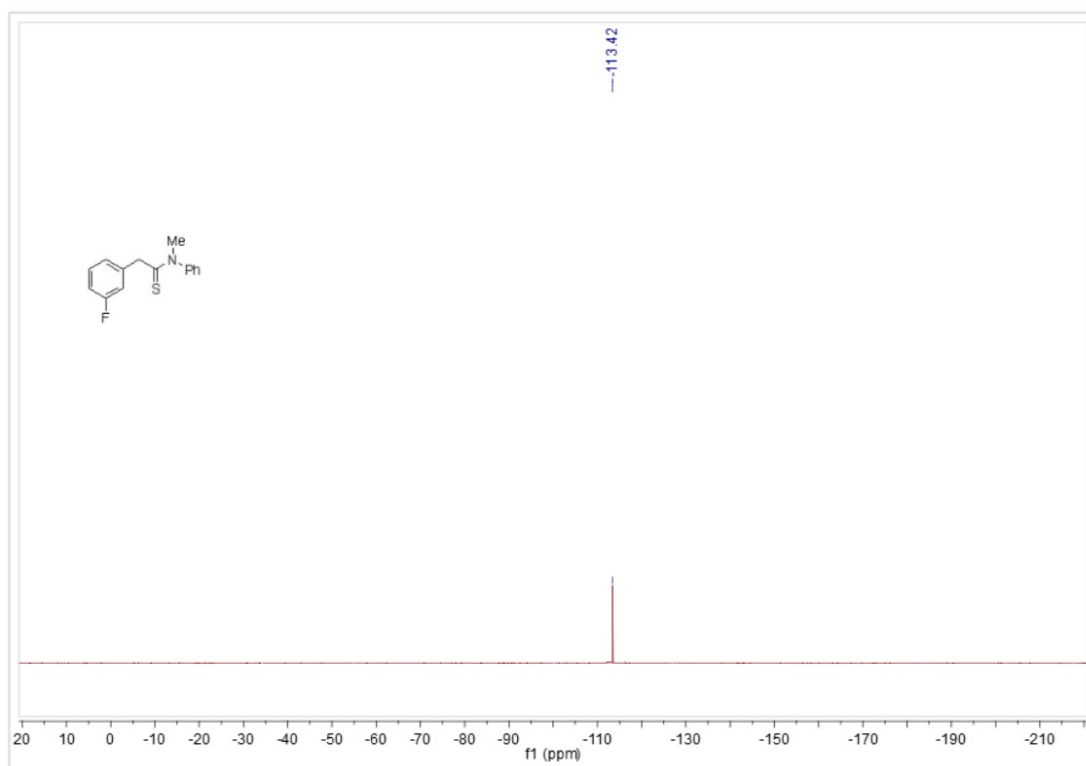

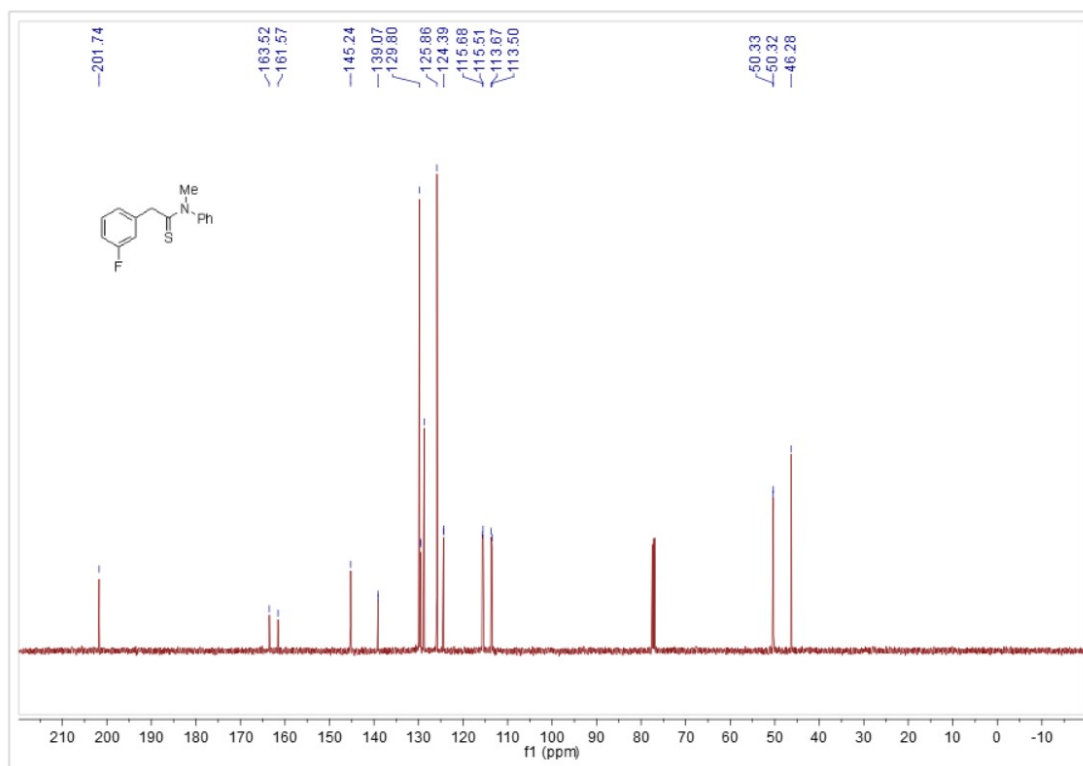

## 2-(Benzo[d][1,3]dioxol-5-yl)-*N*-methyl-*N*-phenylethanethioamide (3eg)

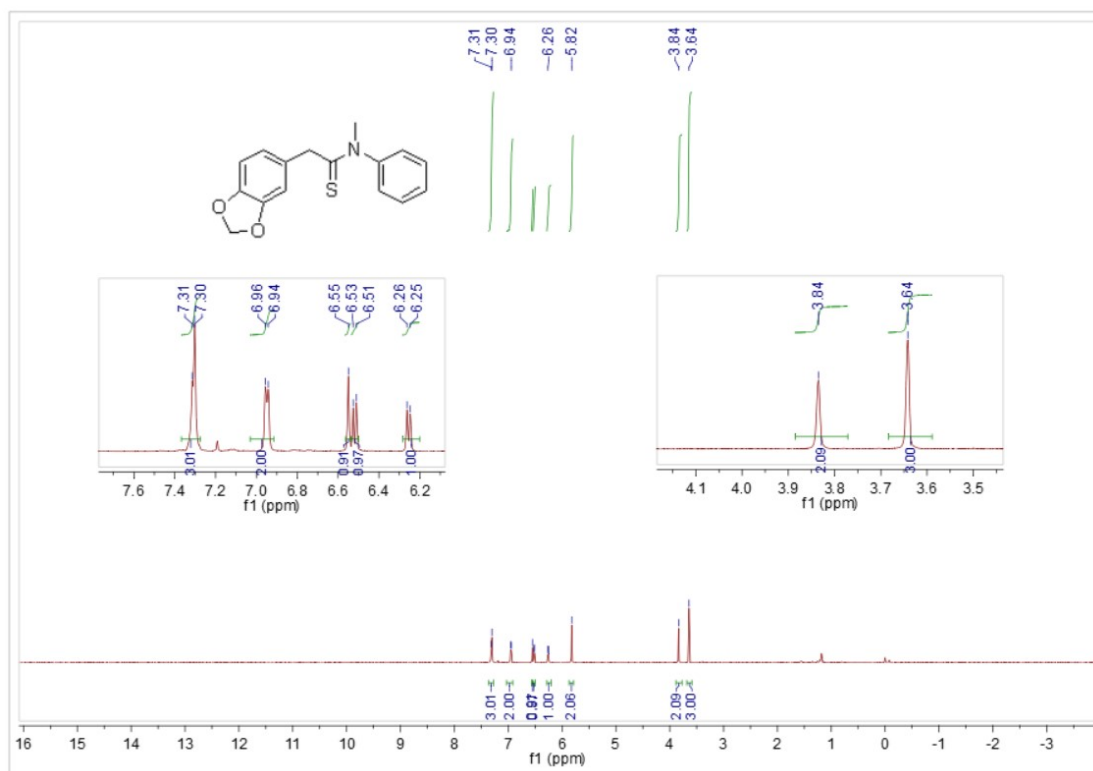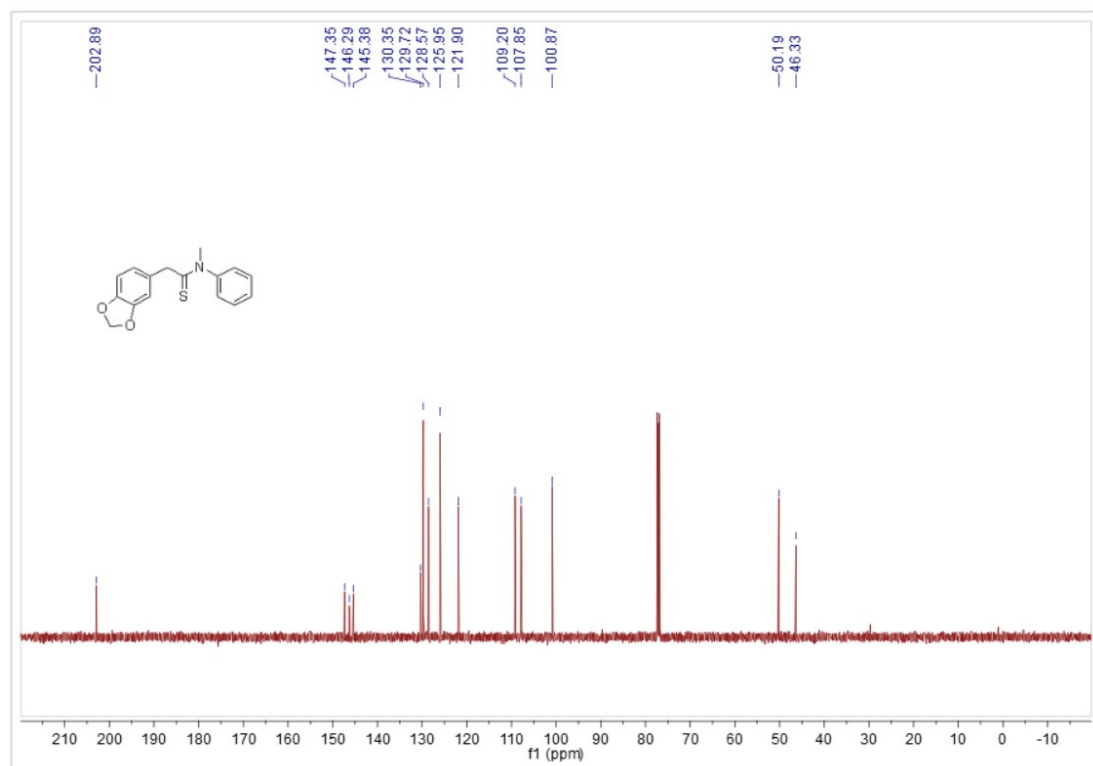

# 1-(Benzofuran-2-yl)-*N*-methyl-*N*-phenylethanethioamide (3eh)

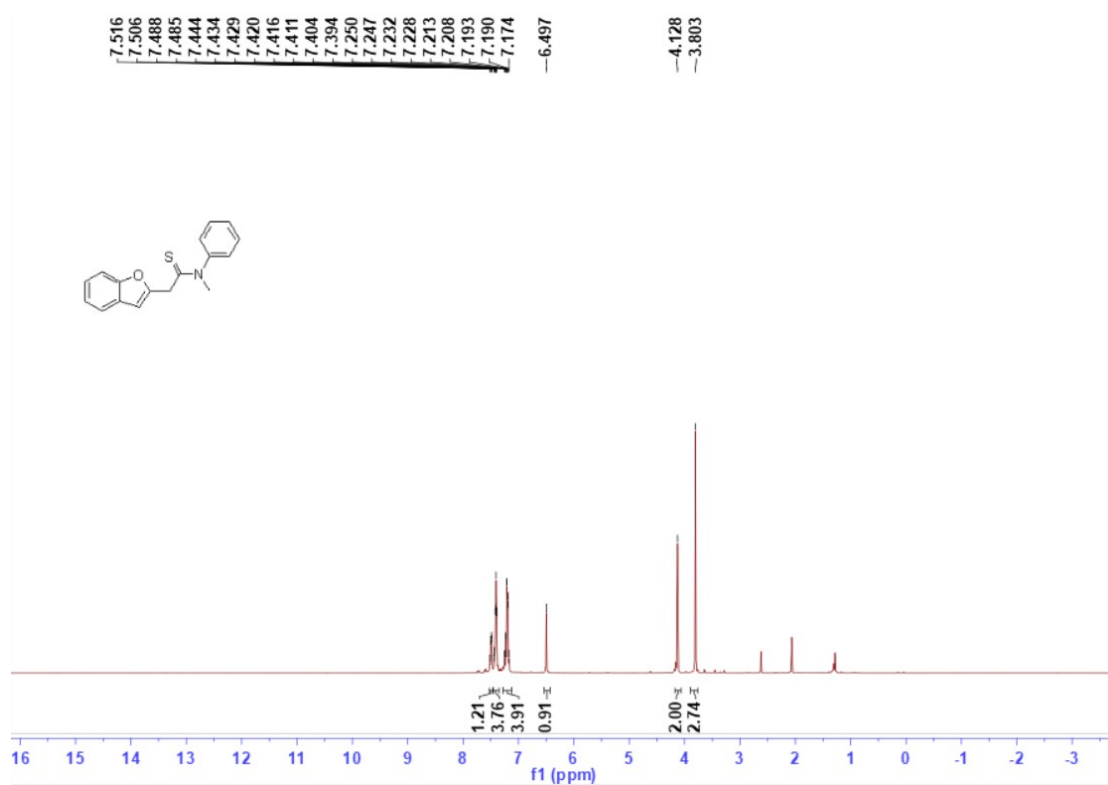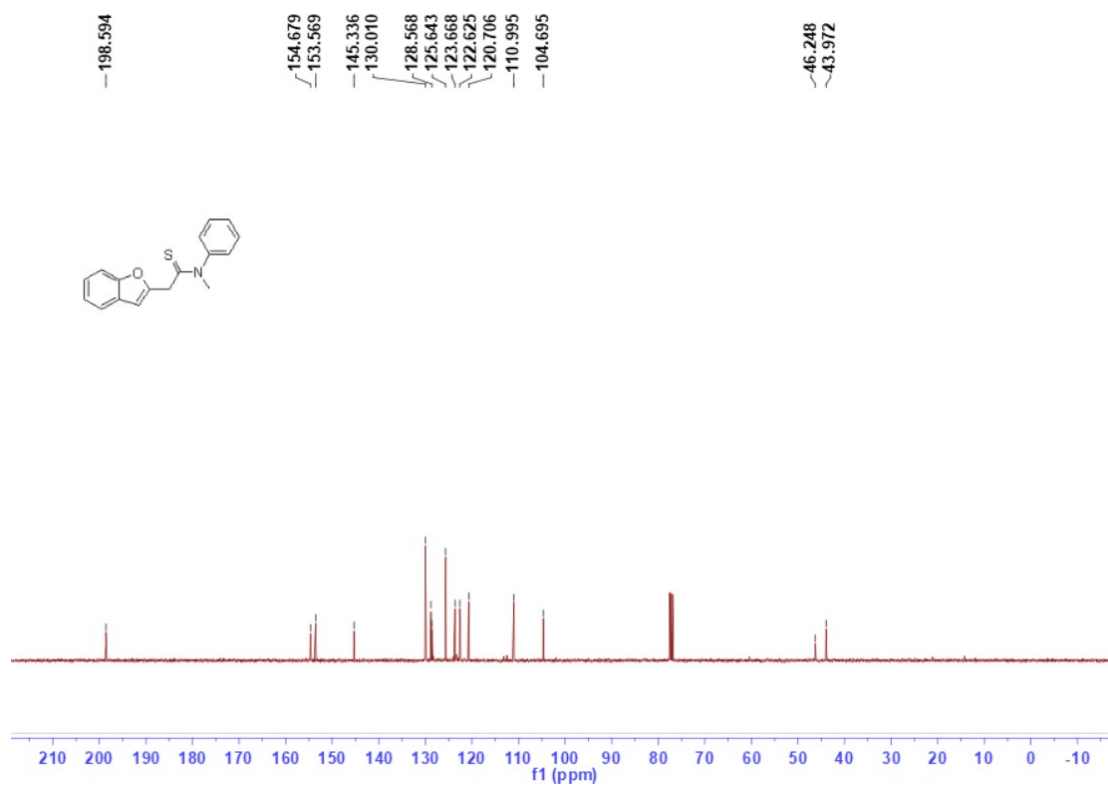



### Cyclohexyl-*N*-methyl-*N*-phenylethanethioamide (3ei)

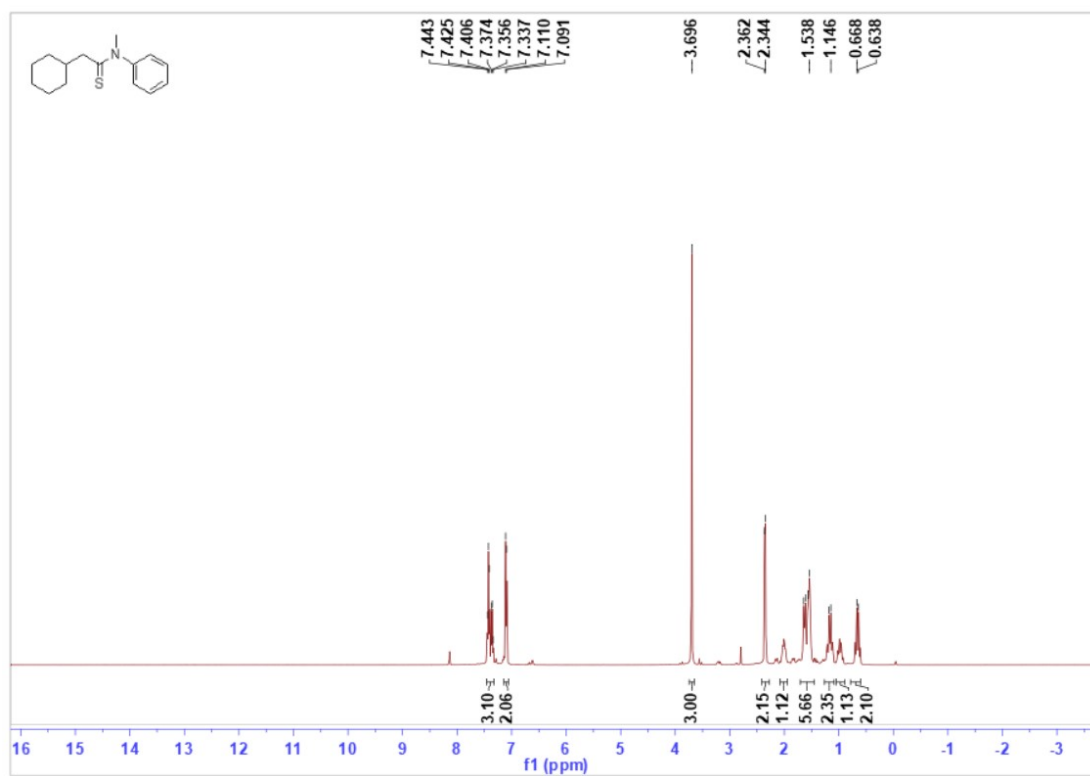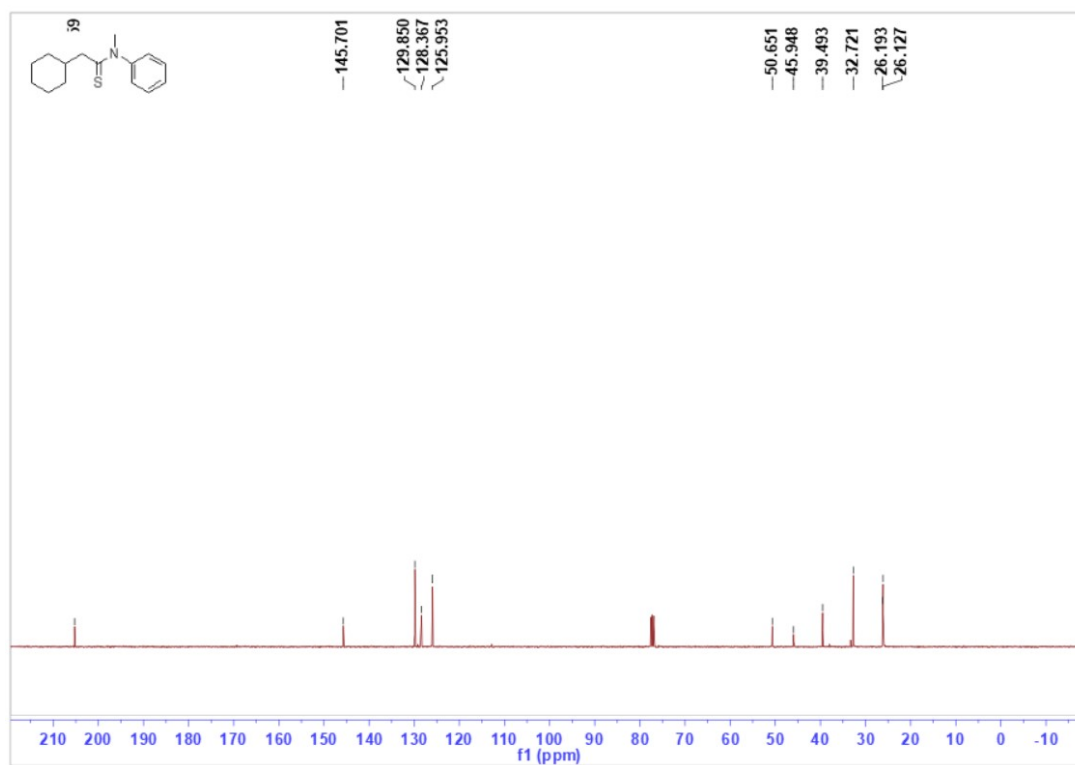

### *N*,3,3-trimethyl-*N*-phenylbutanethioamide (3ej)

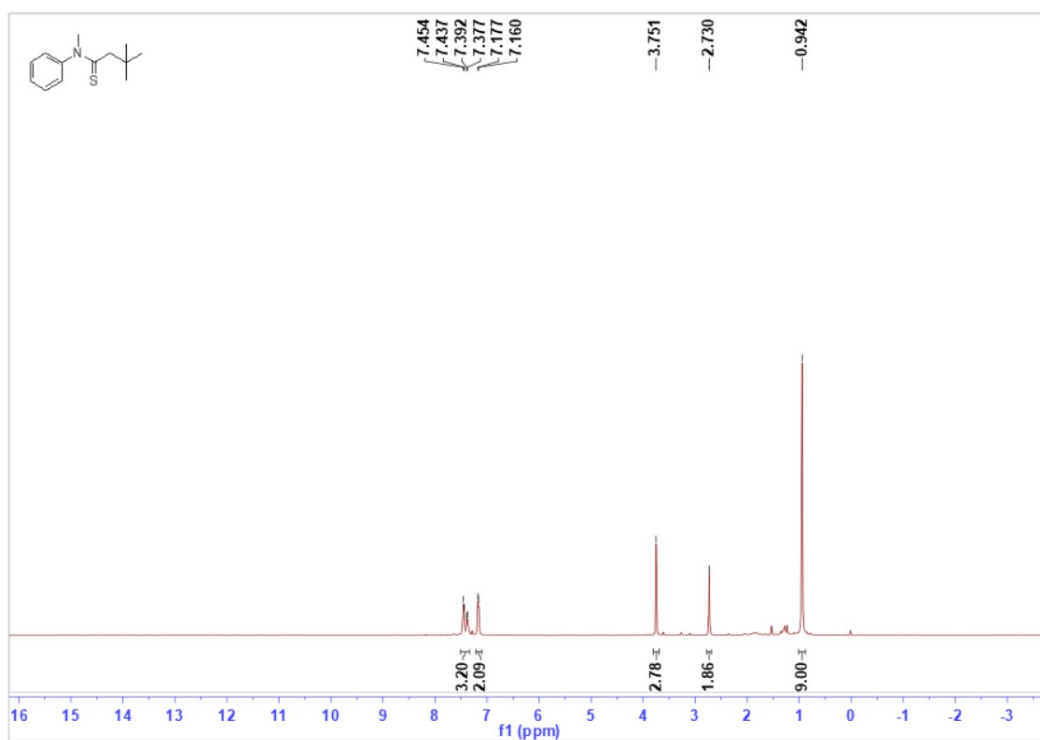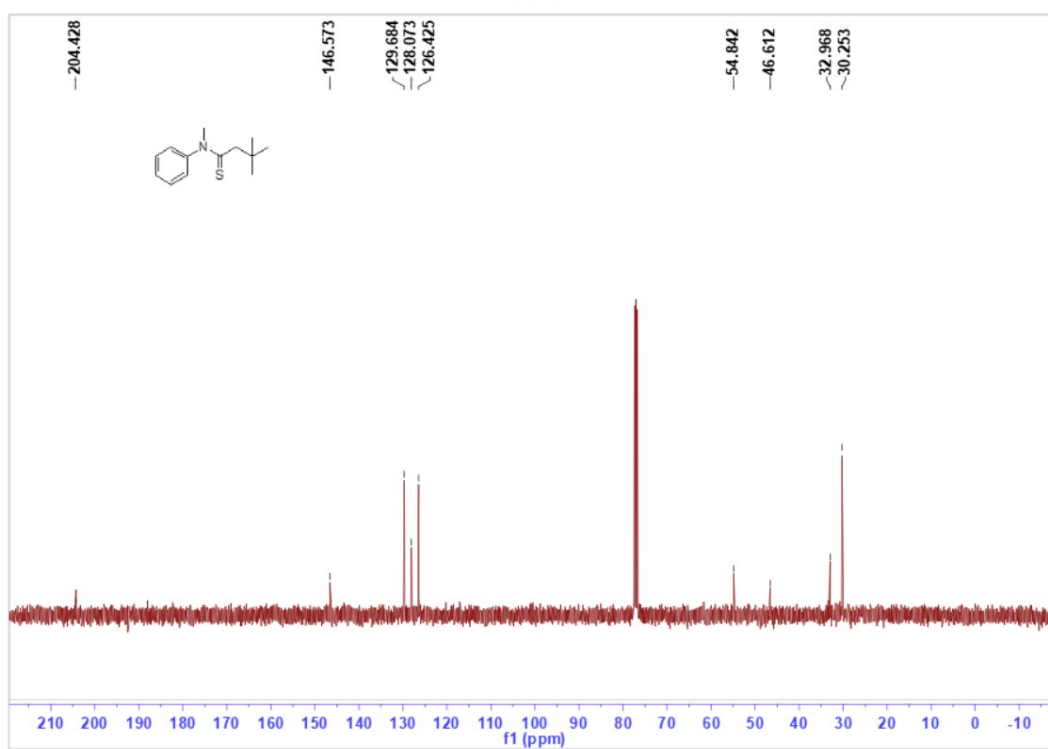

### Ethyl 3-(methyl(phenyl)amino)-3-thioxopropanoate (3ek)

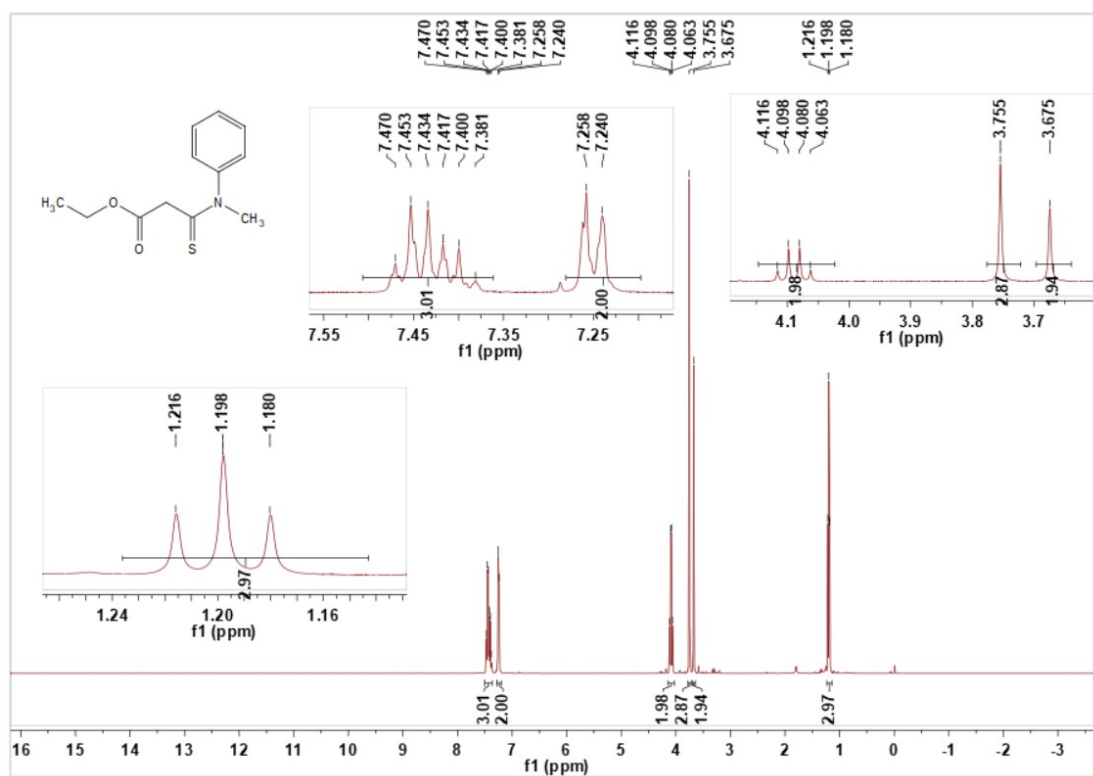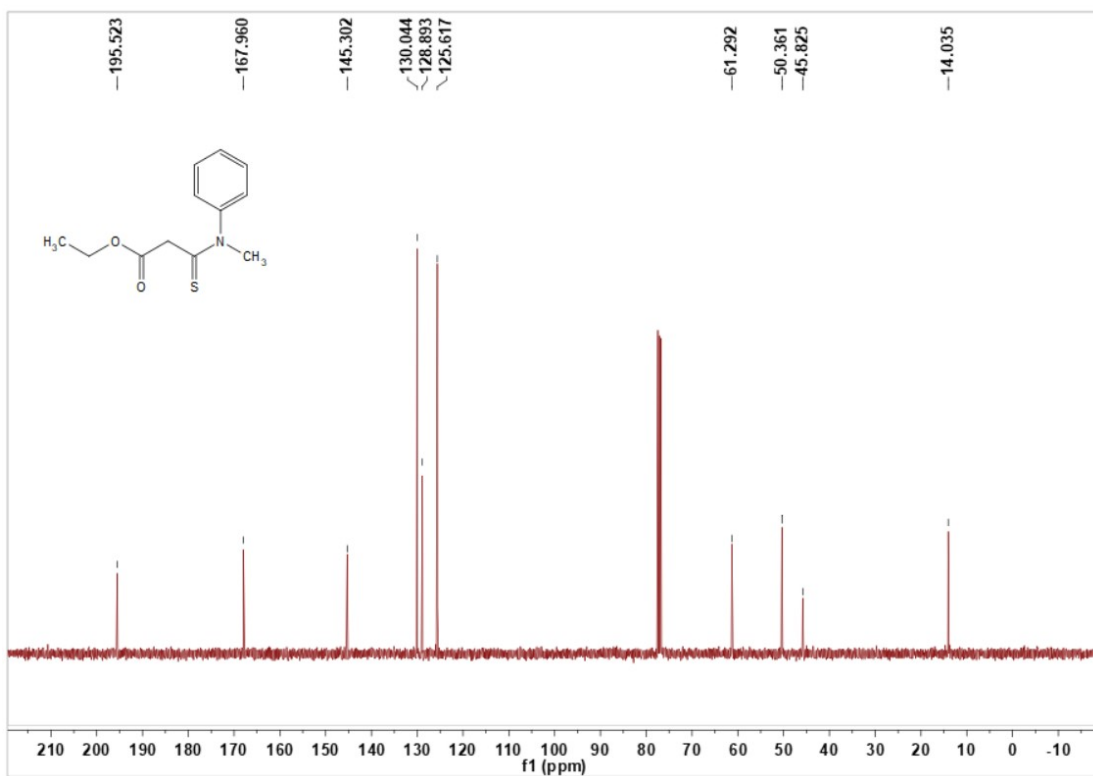

## 2,2'-(1,3-Phenylene)bis(*N*-methyl-*N*-phenylethanethioamide) (3el)

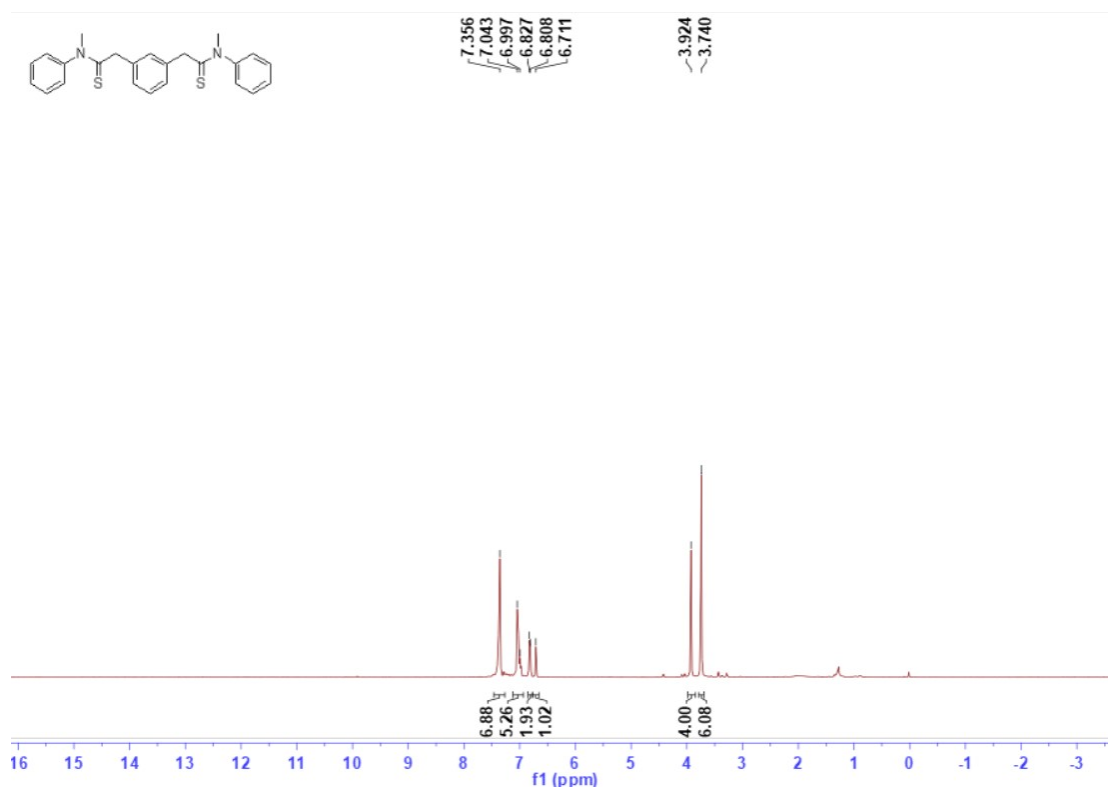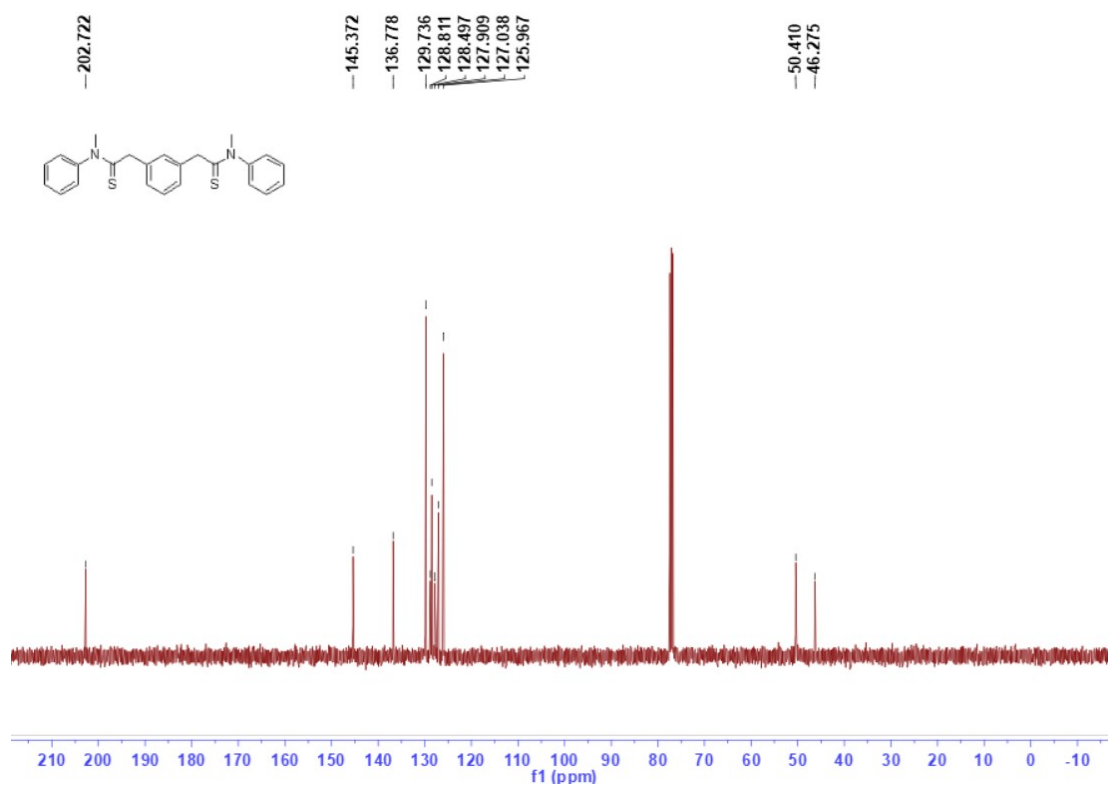

2-([1,1'-Biphenyl]-4-yl)-N-(4-methoxybenzyl)ethanethioamide (3em)

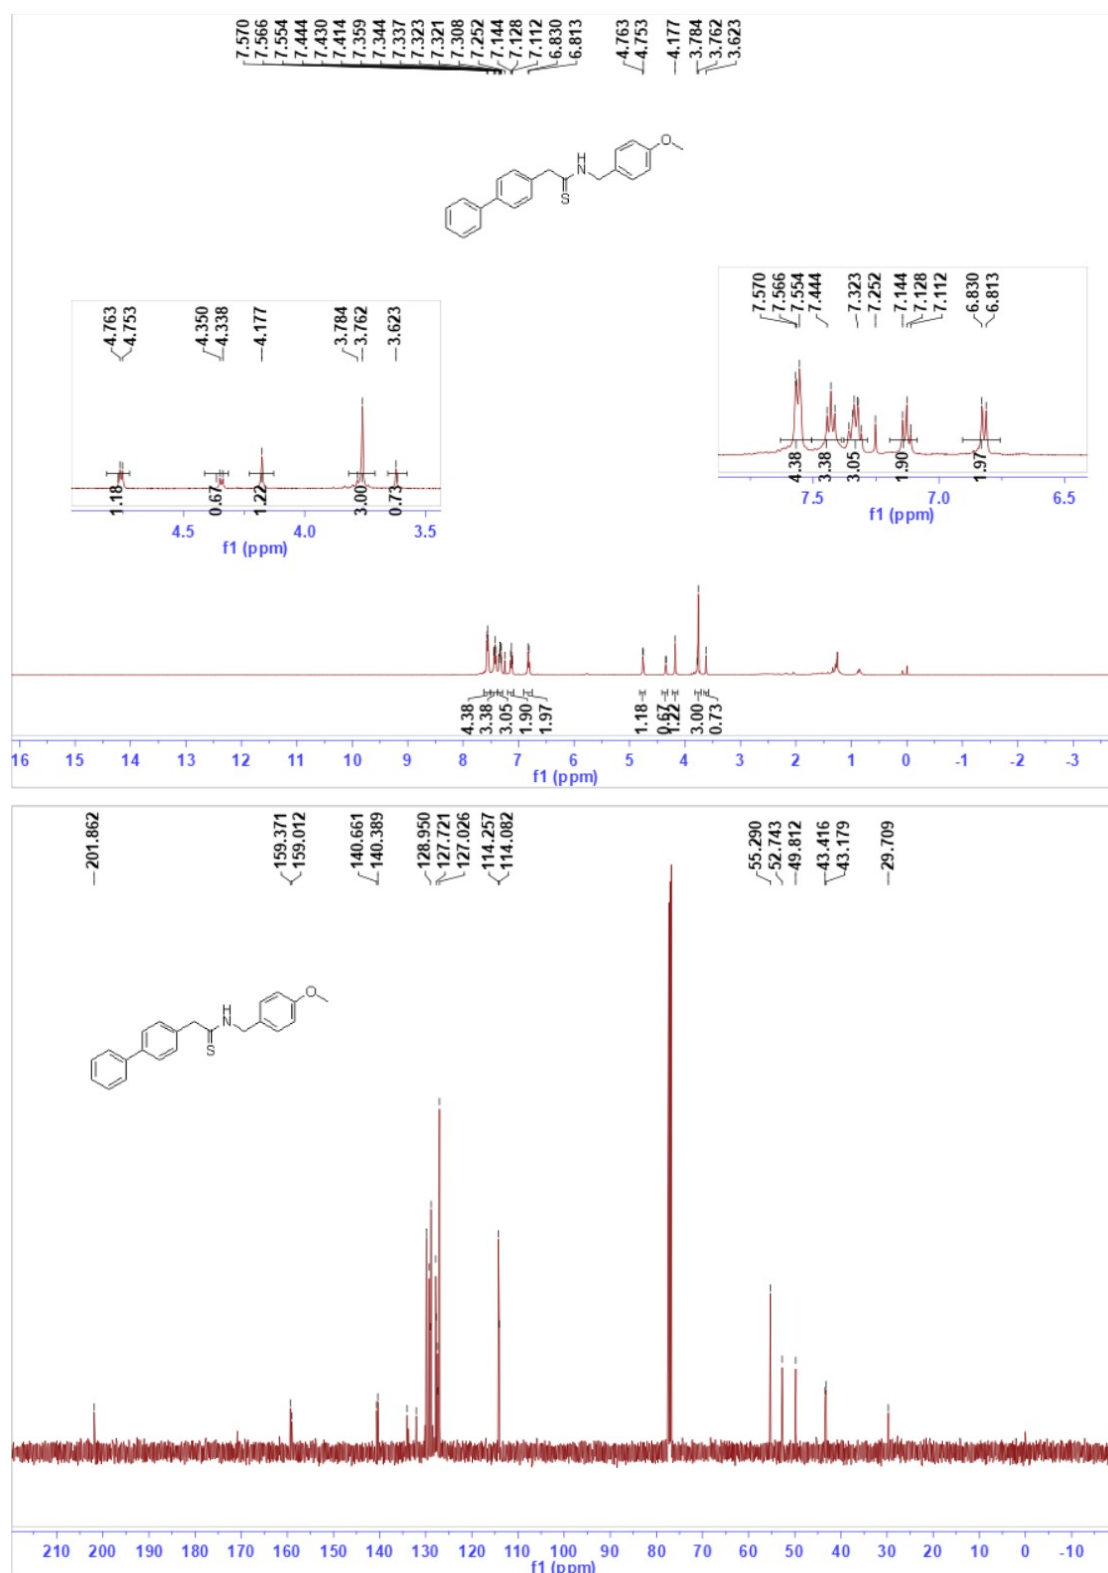

***N*-(4-methoxybenzyl)-2-(4-(trifluoromethoxy)phenyl)ethanethioamide (3en)**

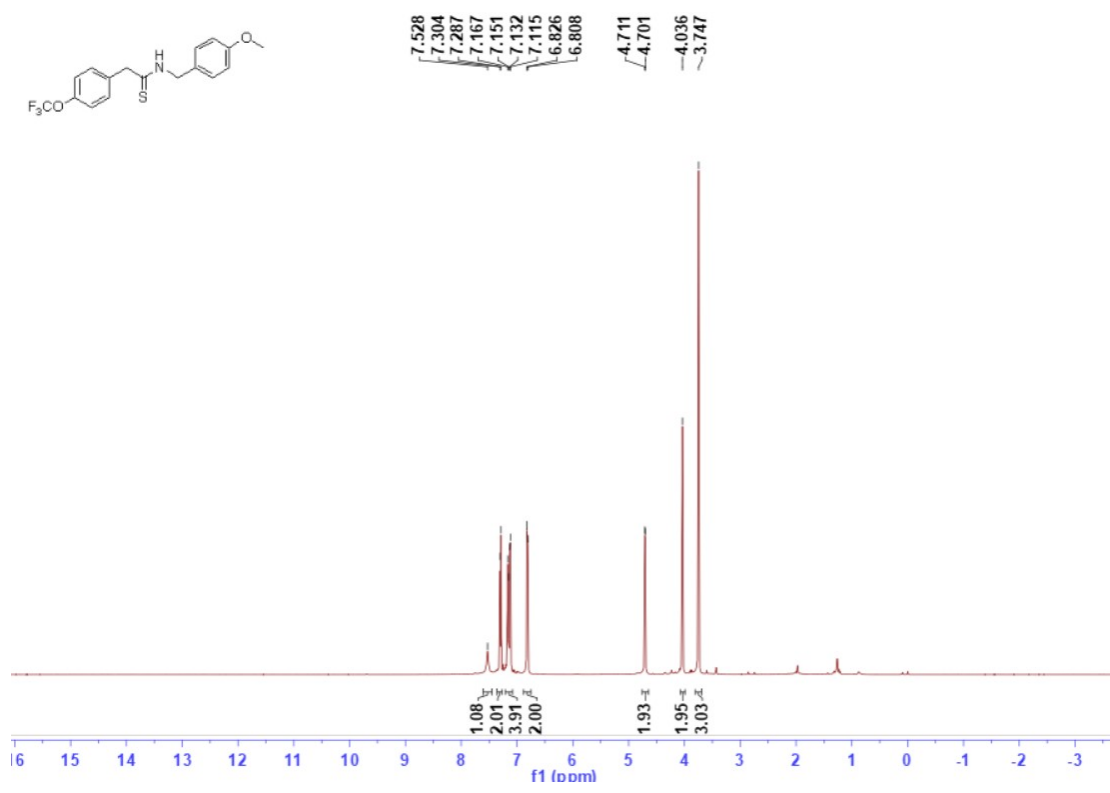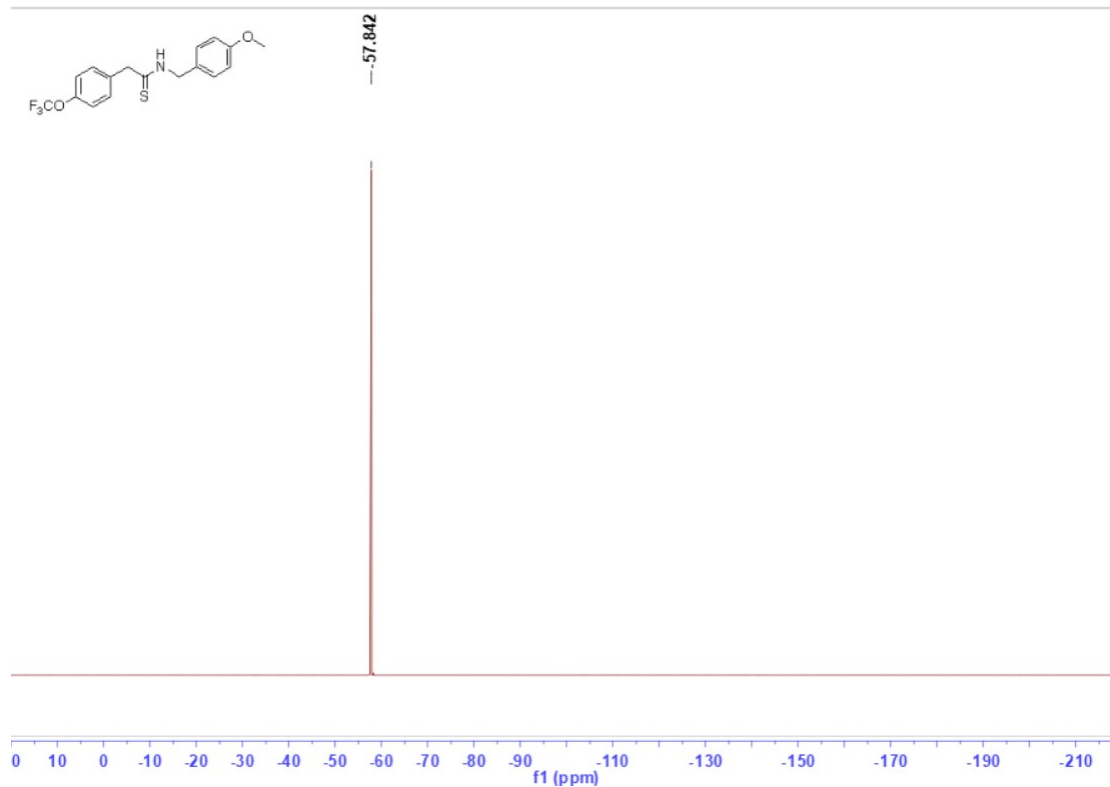

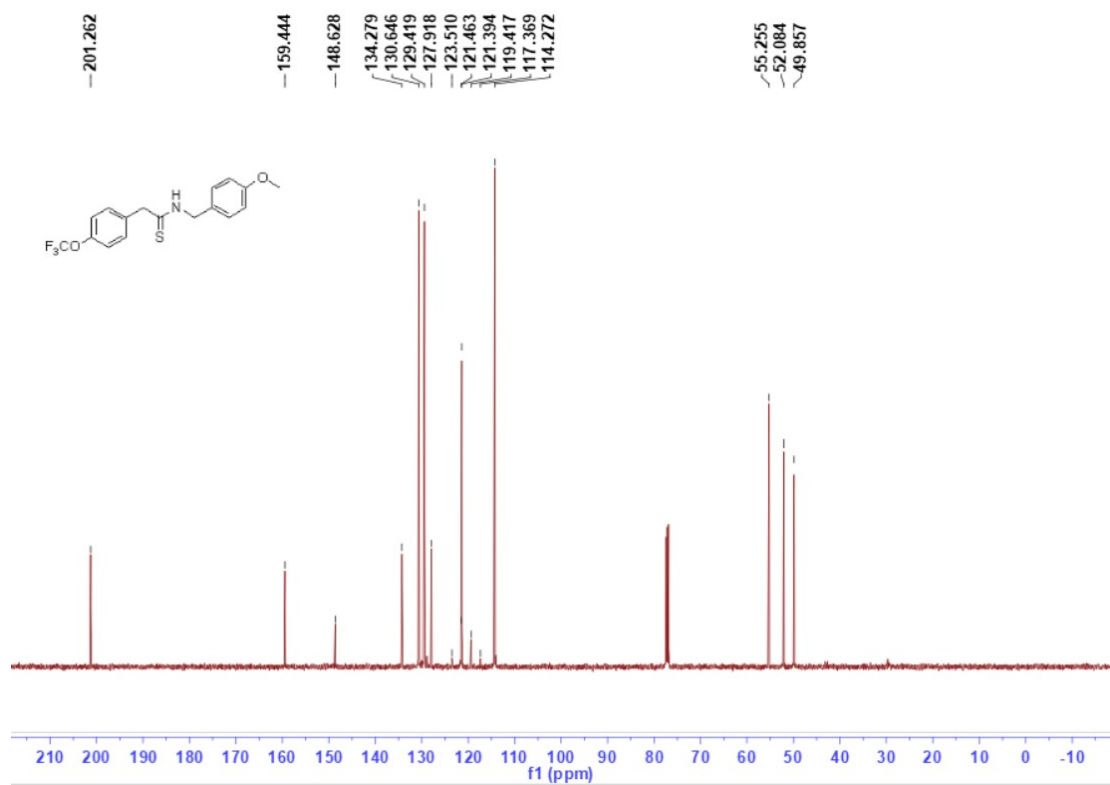

***N*-(4-methoxybenzyl)-2-(4-(methylthio)phenyl)ethanethioamide (3eo)**

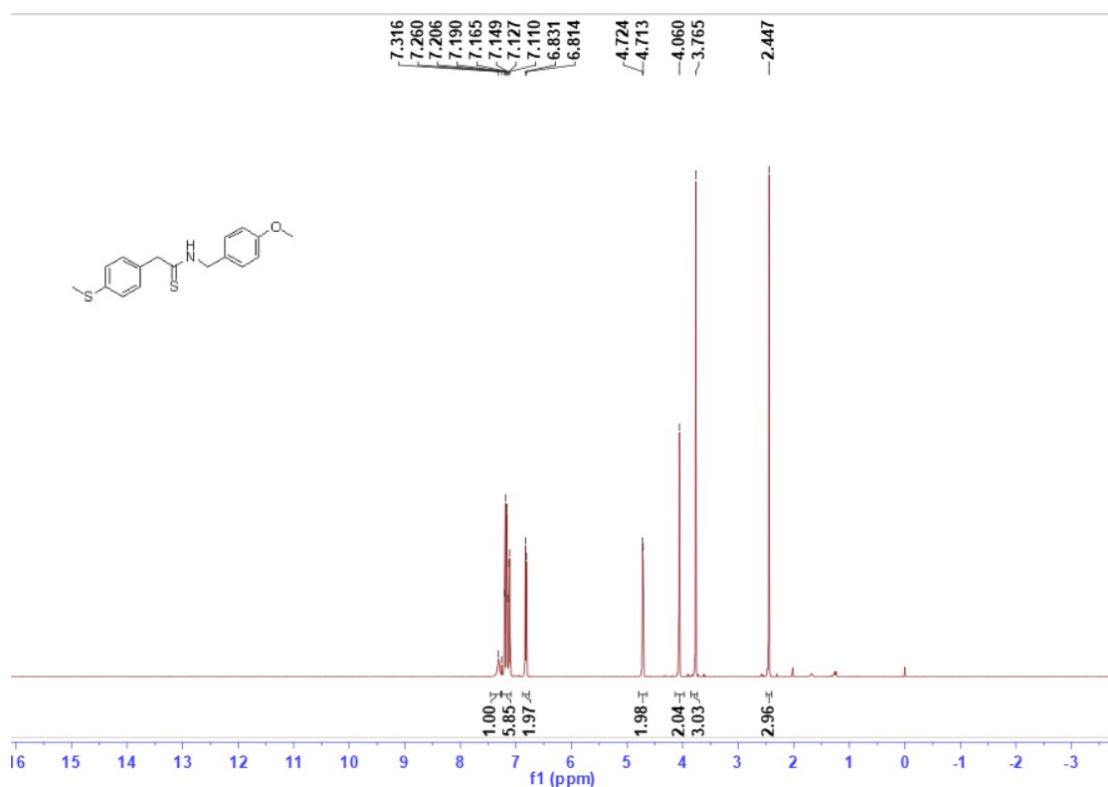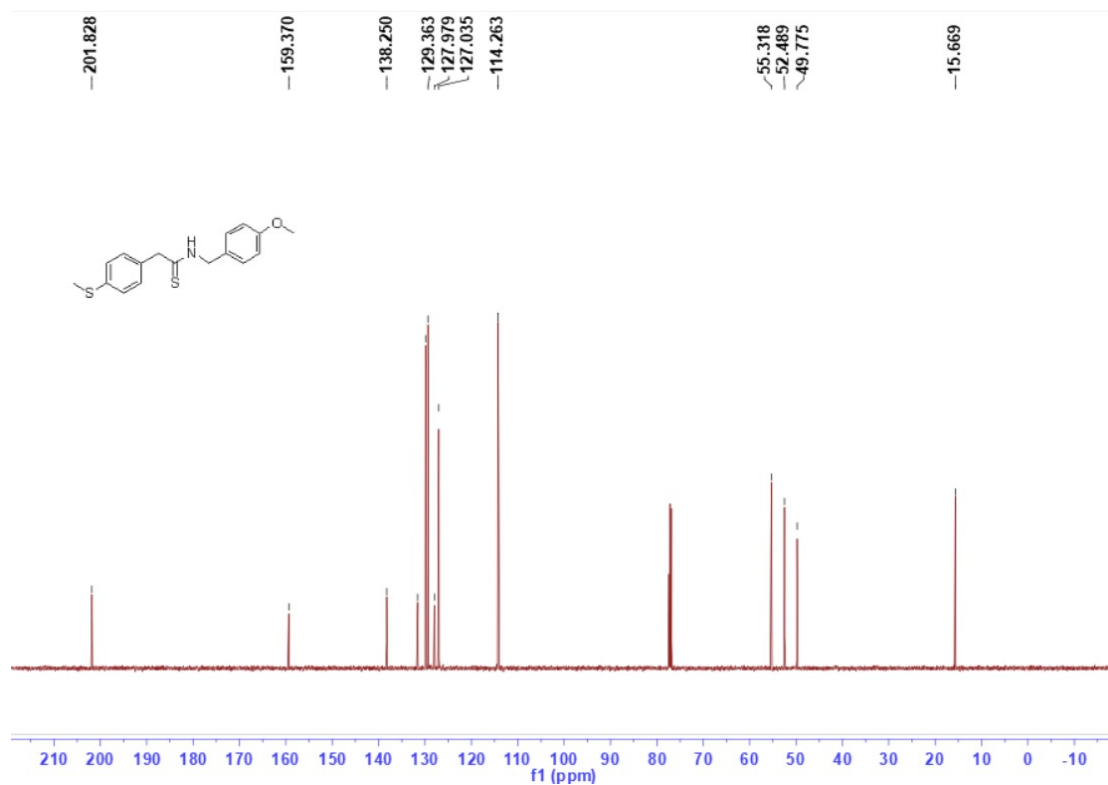



***N*-(4-methoxybenzyl)-2-(4-(4,4,5,5-tetramethyl-1,3,2-dioxaborolan-2-yl)phenyl)ethanethioamide (3ep)**

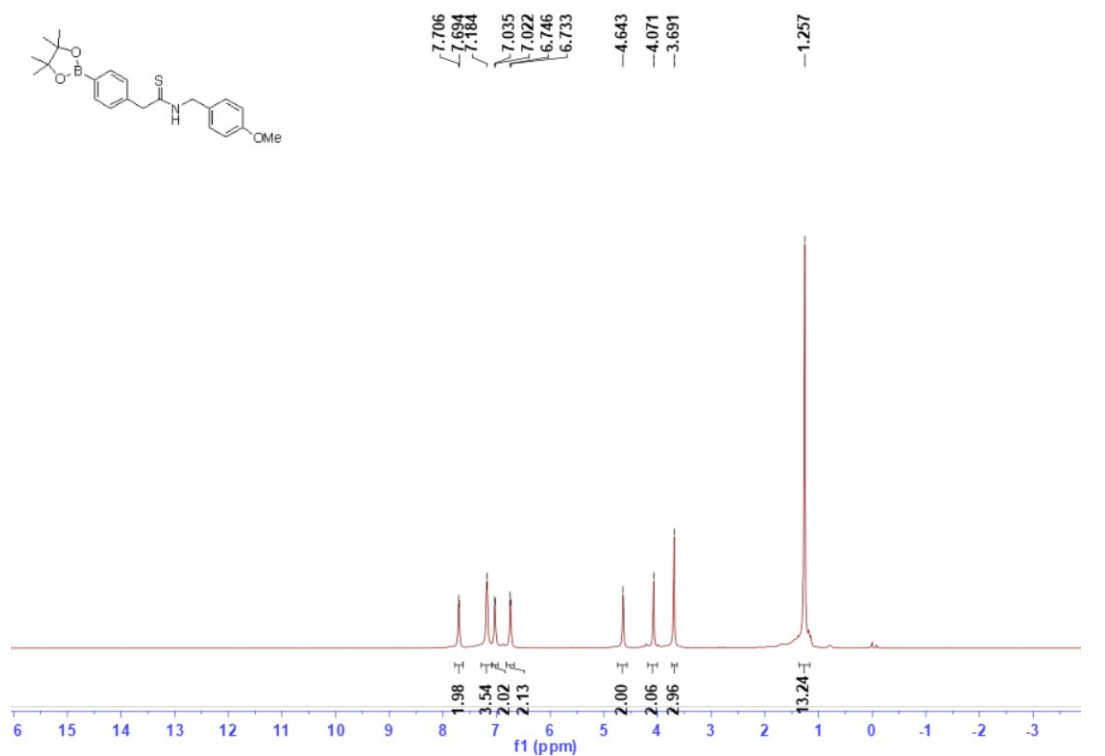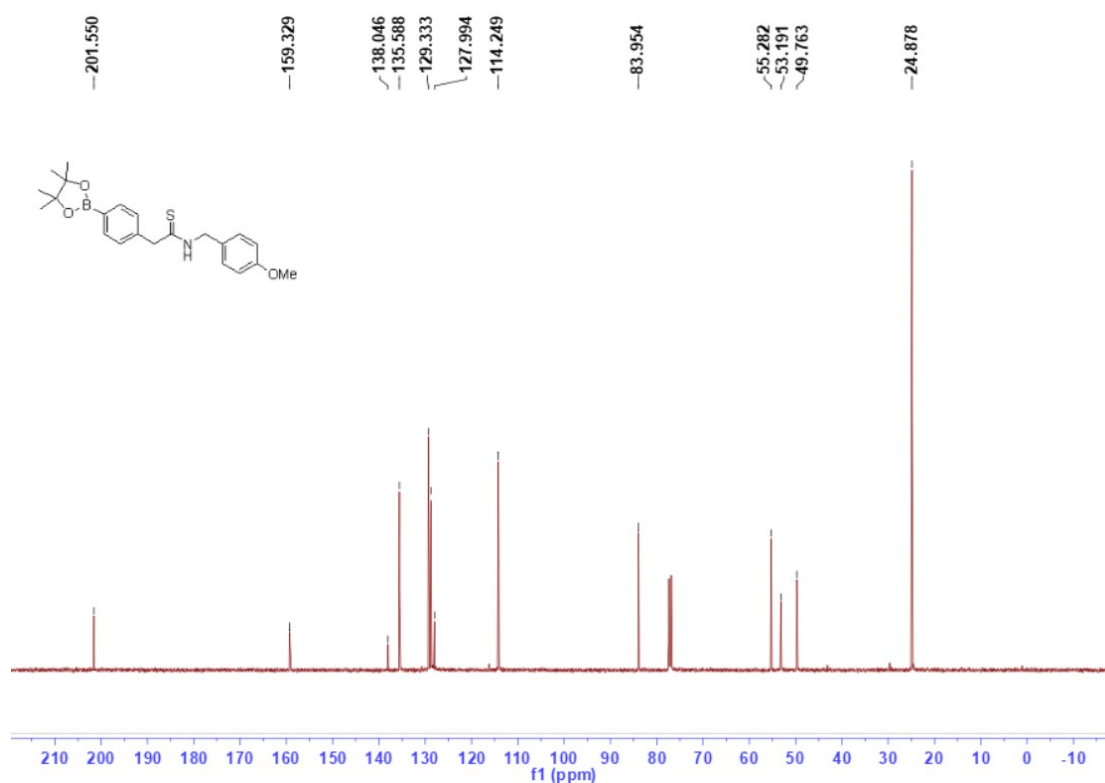

***N*-(4-methoxybenzyl)-2-(4-(morpholine-4-carbonyl)phenyl)ethanethioamide (3eq)**

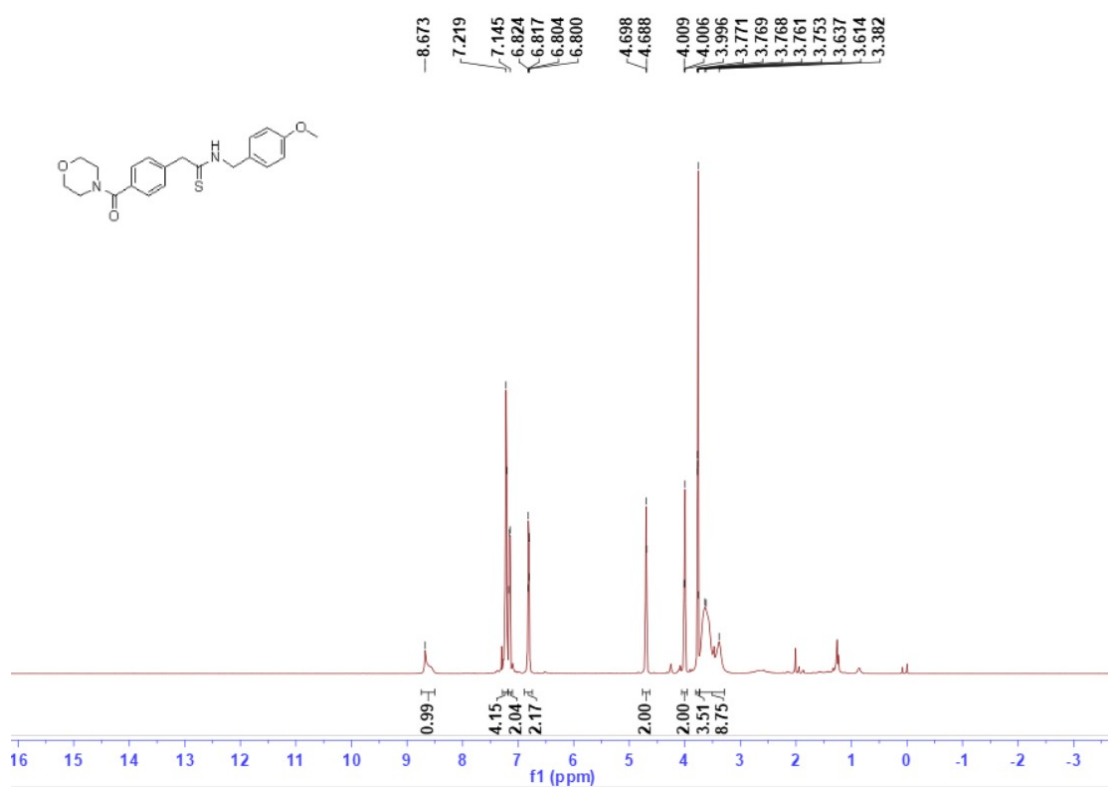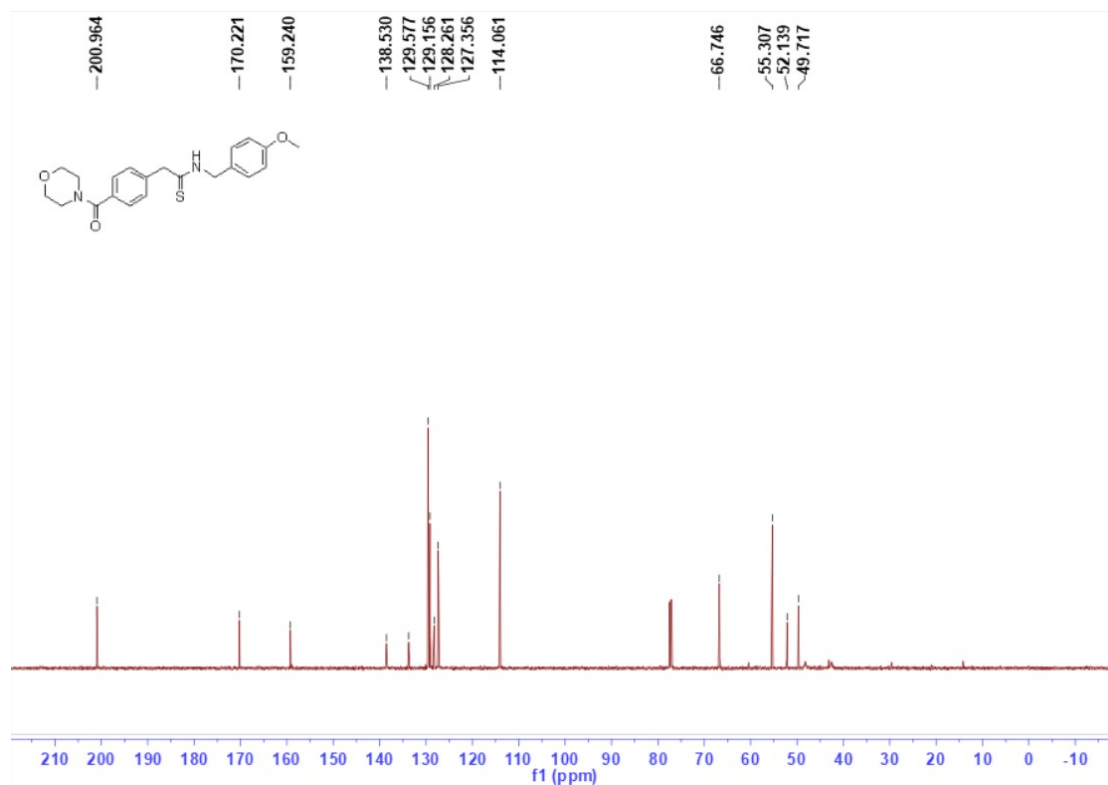

# *N*-(4-methoxybenzyl)-3-morpholino-3-oxopropanethioamide (3er)

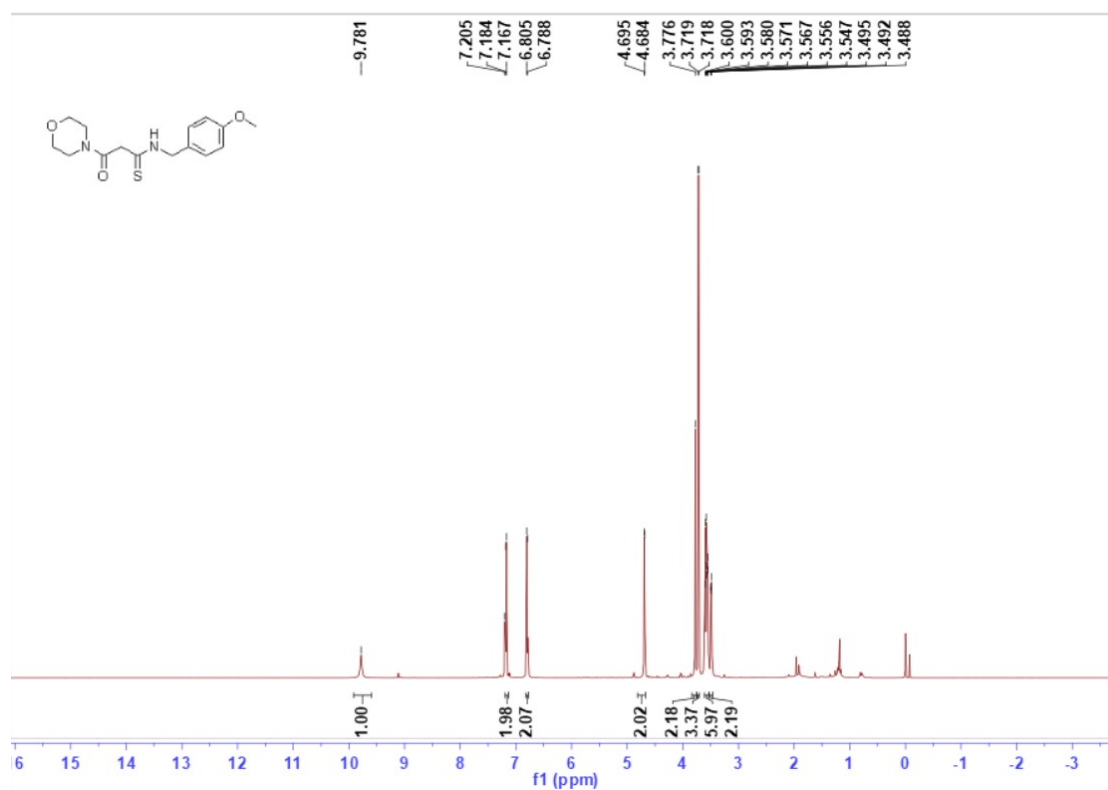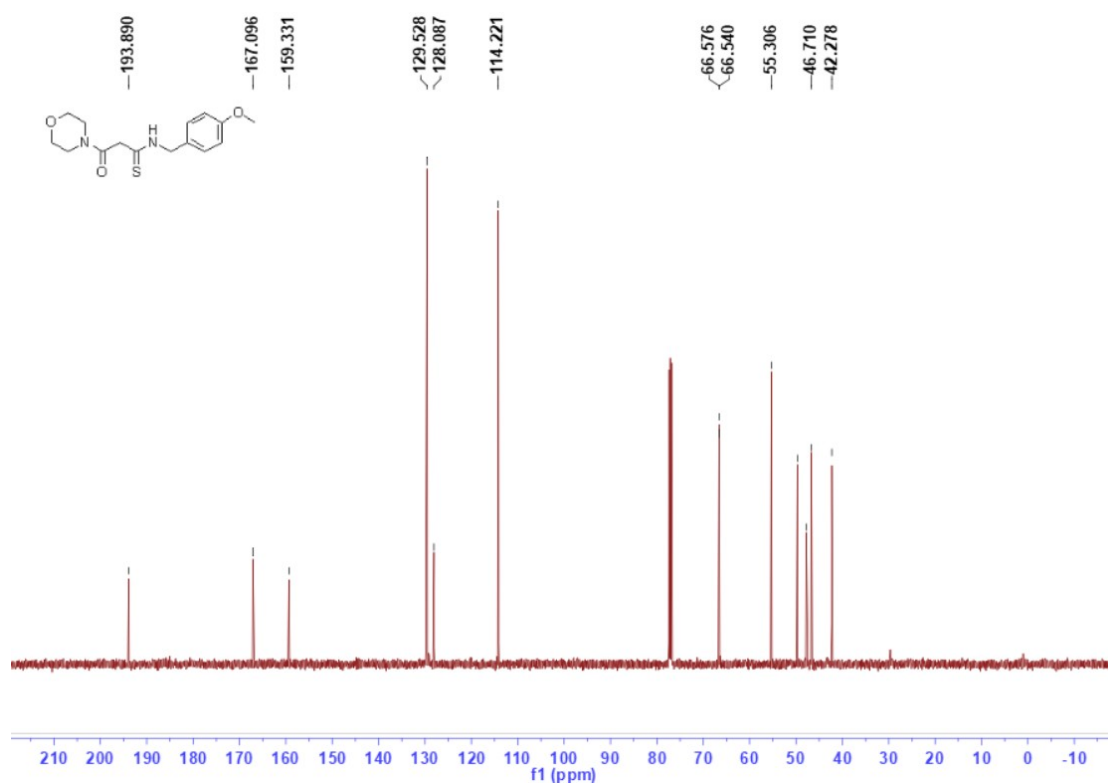

### *N*-(2,6-dioxopiperidin-3-yl)-2-phenylethanothioamide (3es)

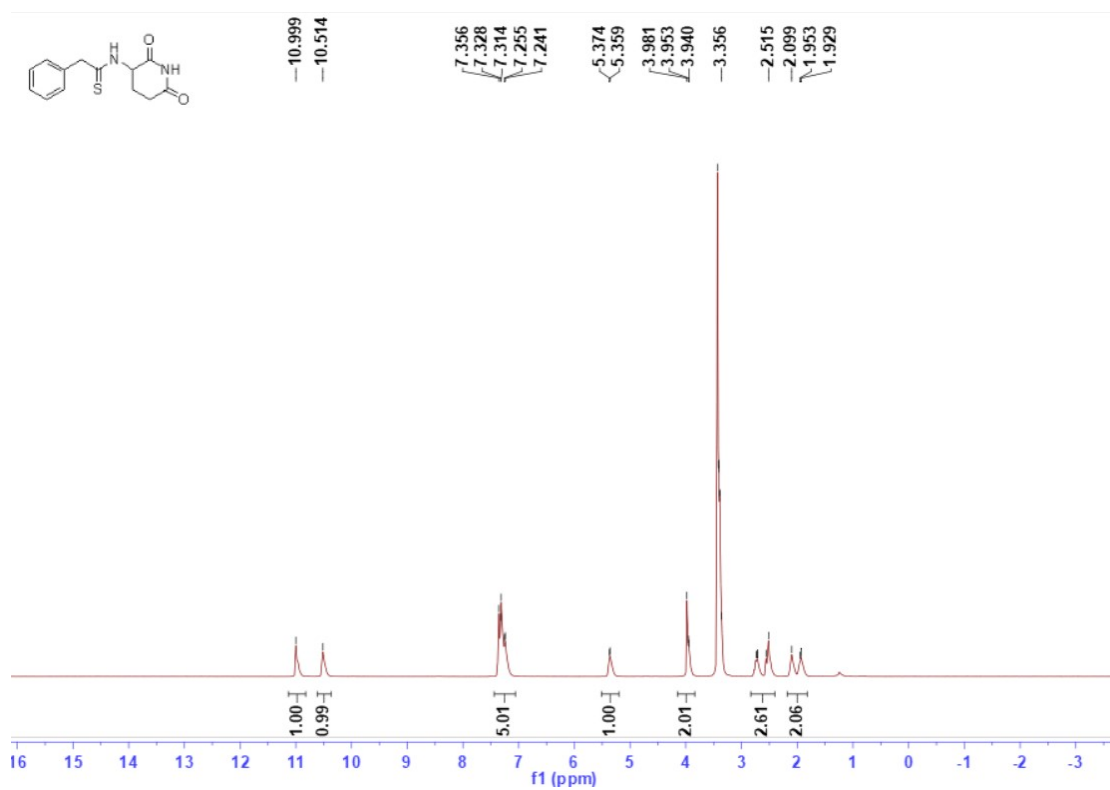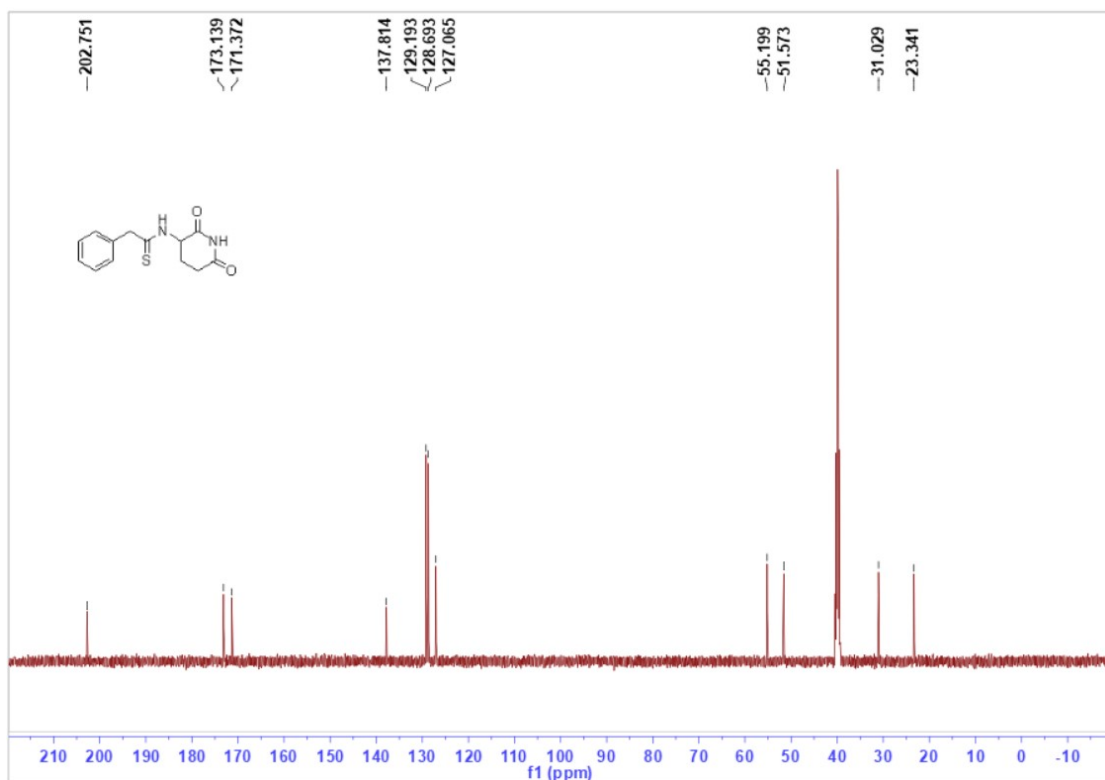

***N*-(2,6-dioxopiperidin-3-yl)-2-(4-hydroxyphenyl)ethanethioamide (3et)**

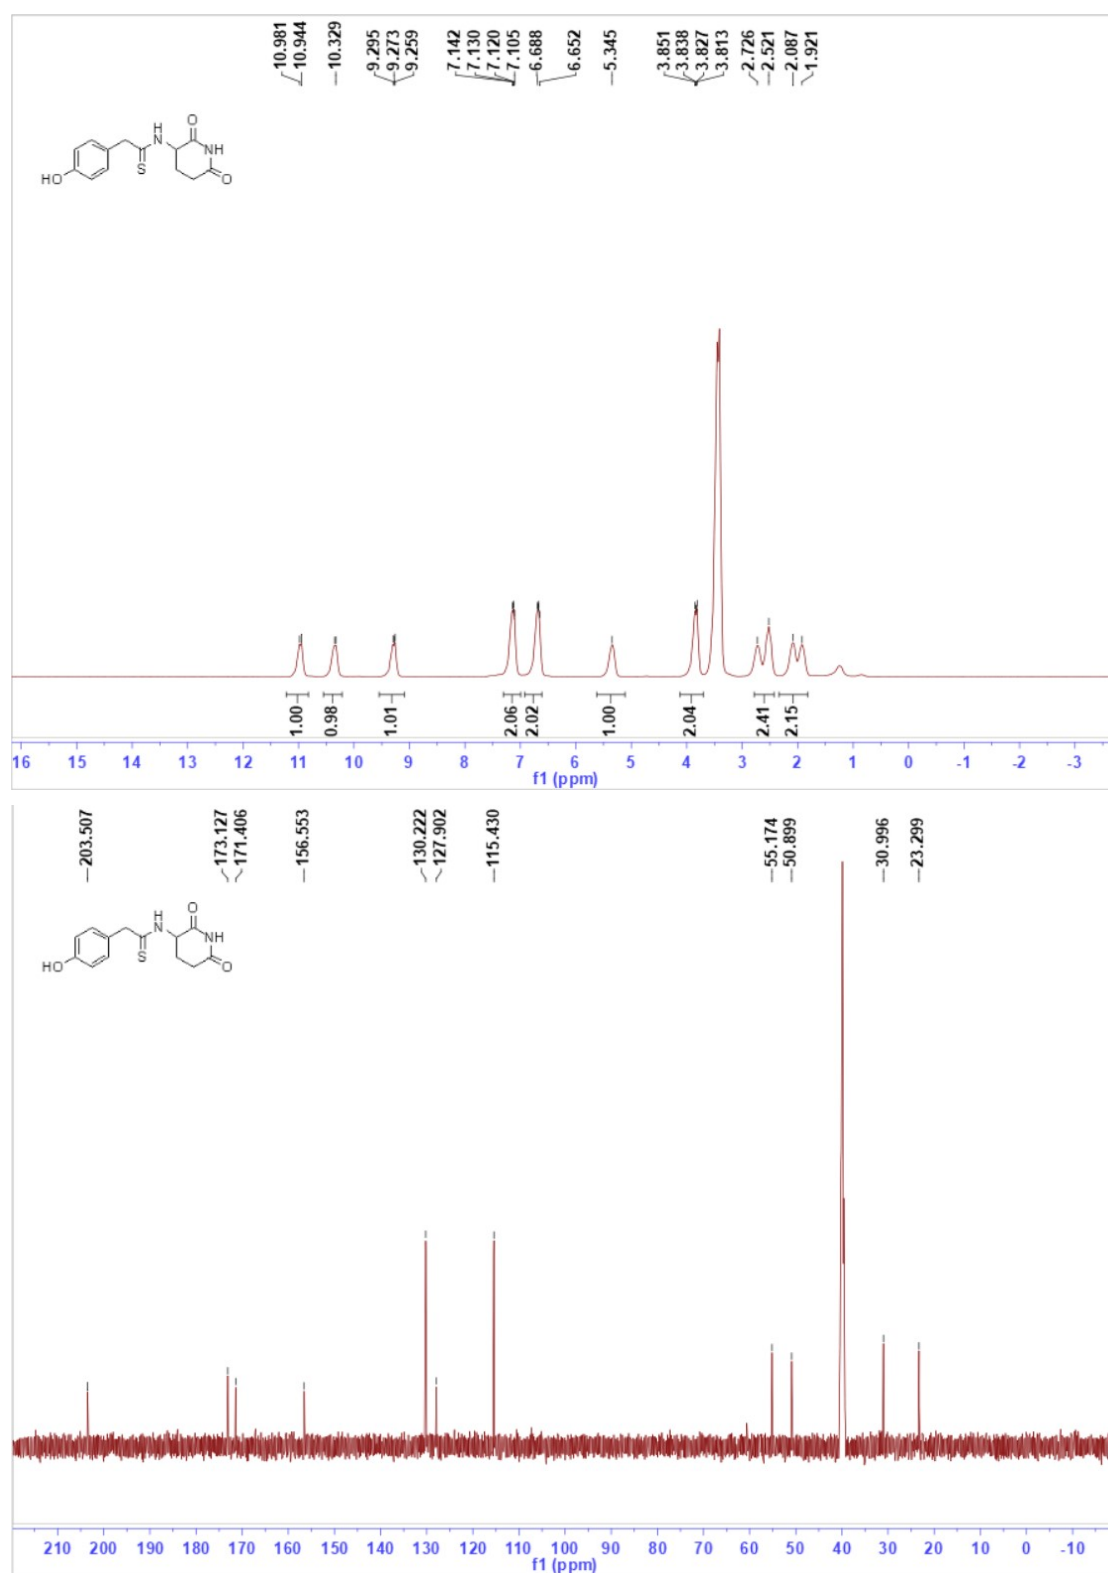

# *N*-propyl-2-(thiophen-2-yl)ethanethioamide (3eu)

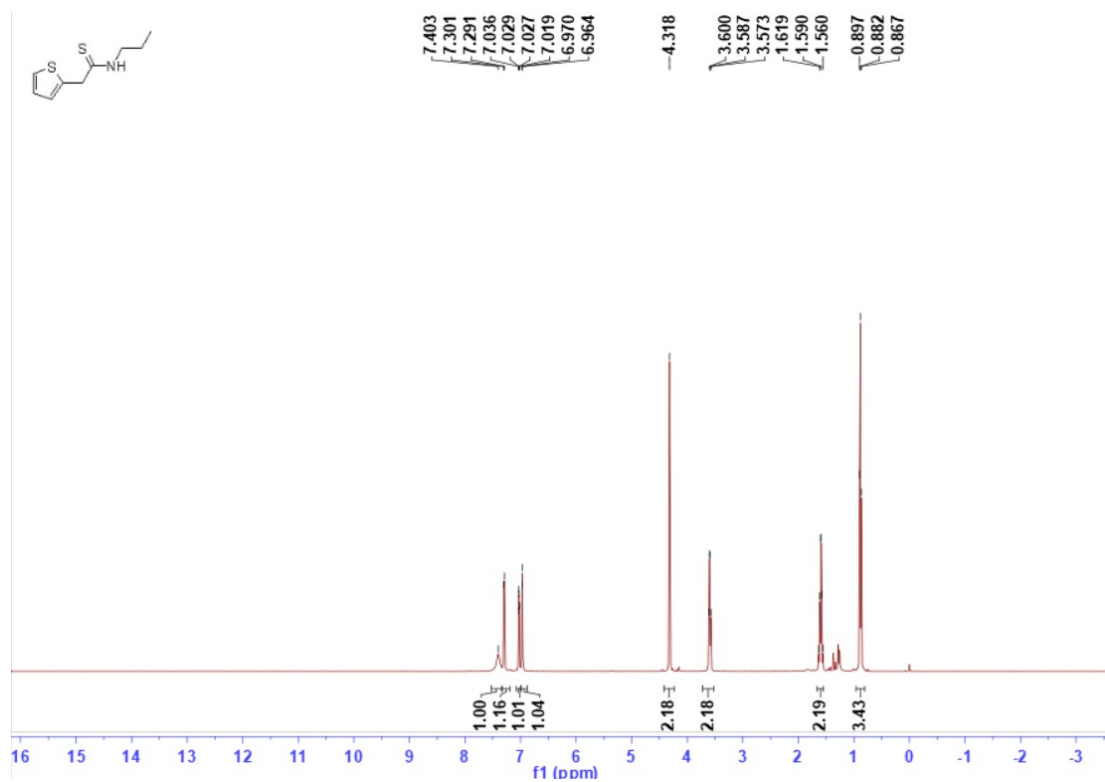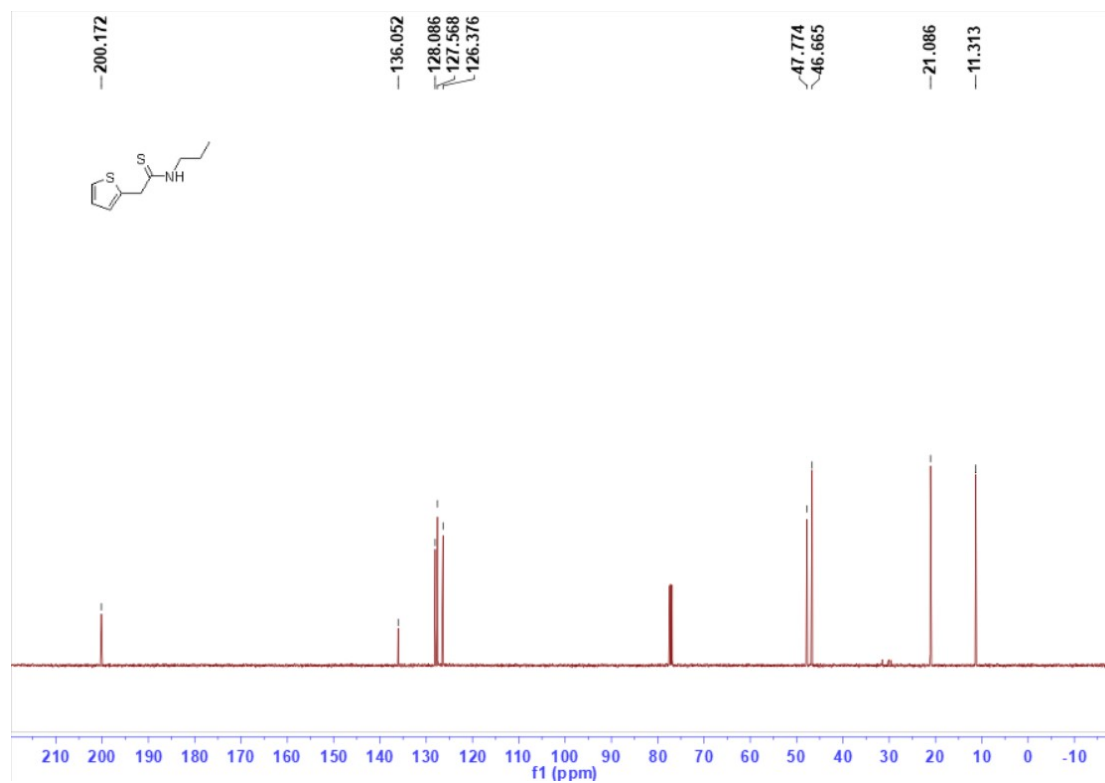

### (2-(Thiophen-2-yl)ethyl)propan-1-amine (3ev)

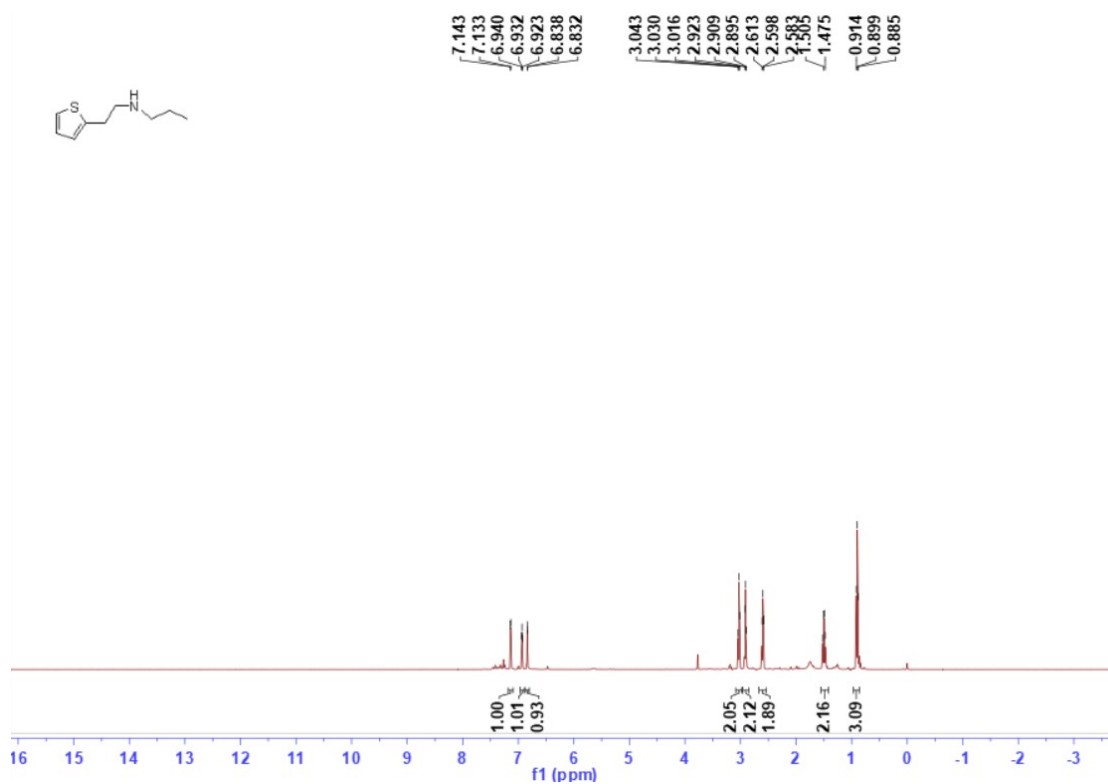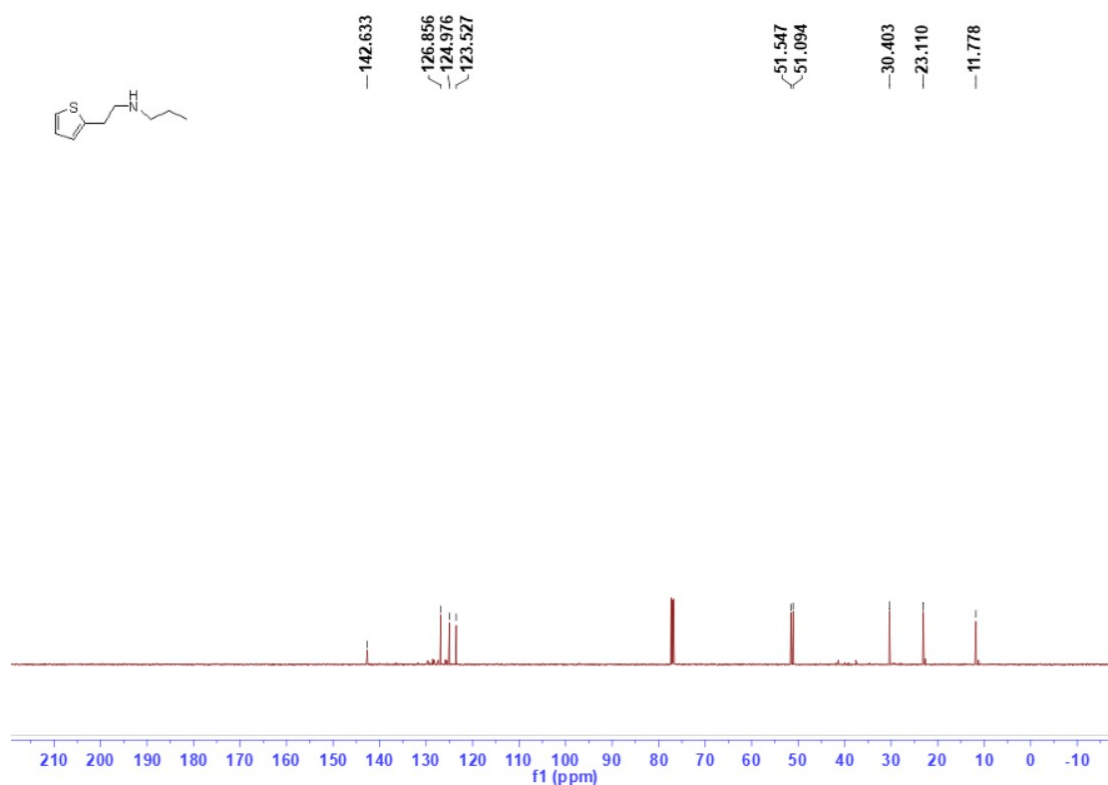

**1-(4-((4-(tert-butyl)phenyl)sulfonyl)piperazin-1-yl)-2-(pyridin-2-yl)ethane-1-thione (3ew)**

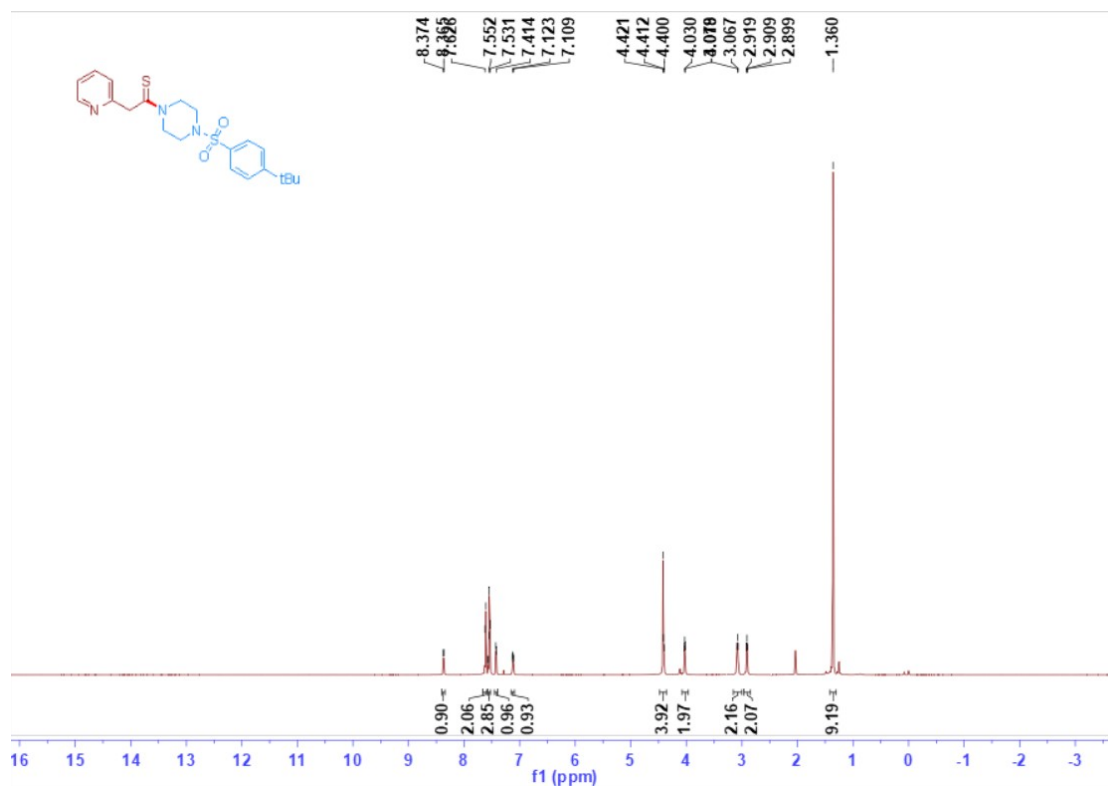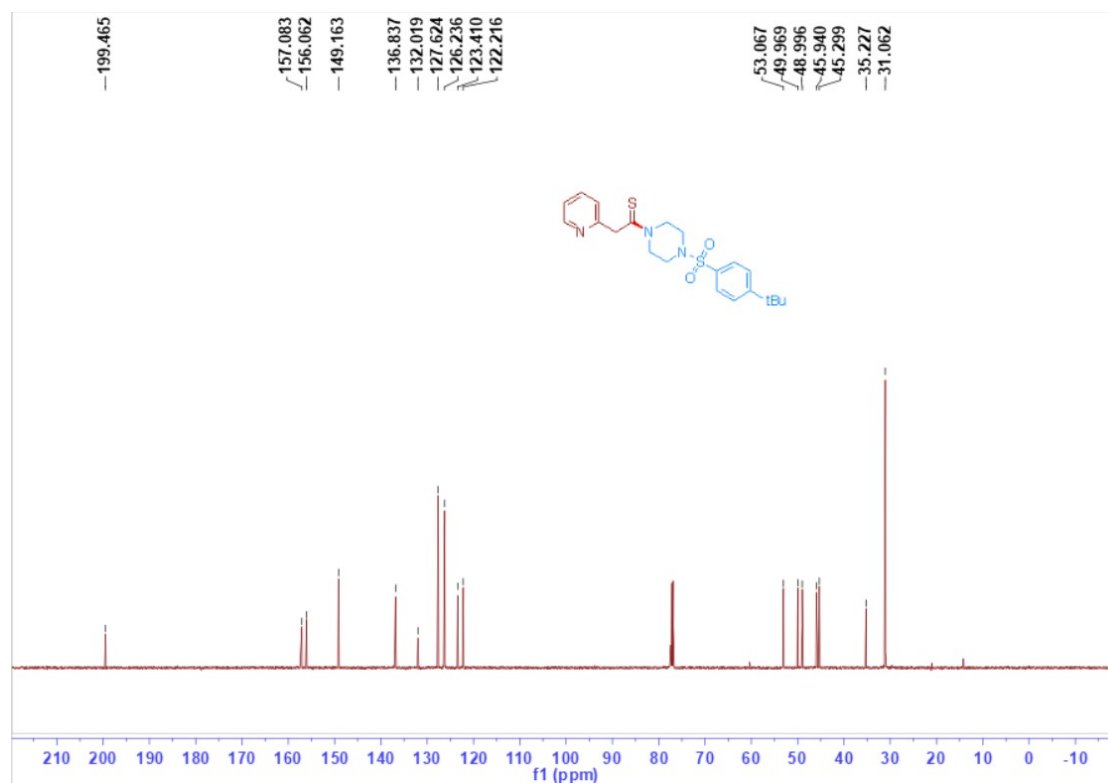



**1-(4-((4-(tert-butyl)phenyl)sulfonyl)piperazin-1-yl)-2-(6-methoxypyridin-3-yl)ethane-1-thione (3ex)**

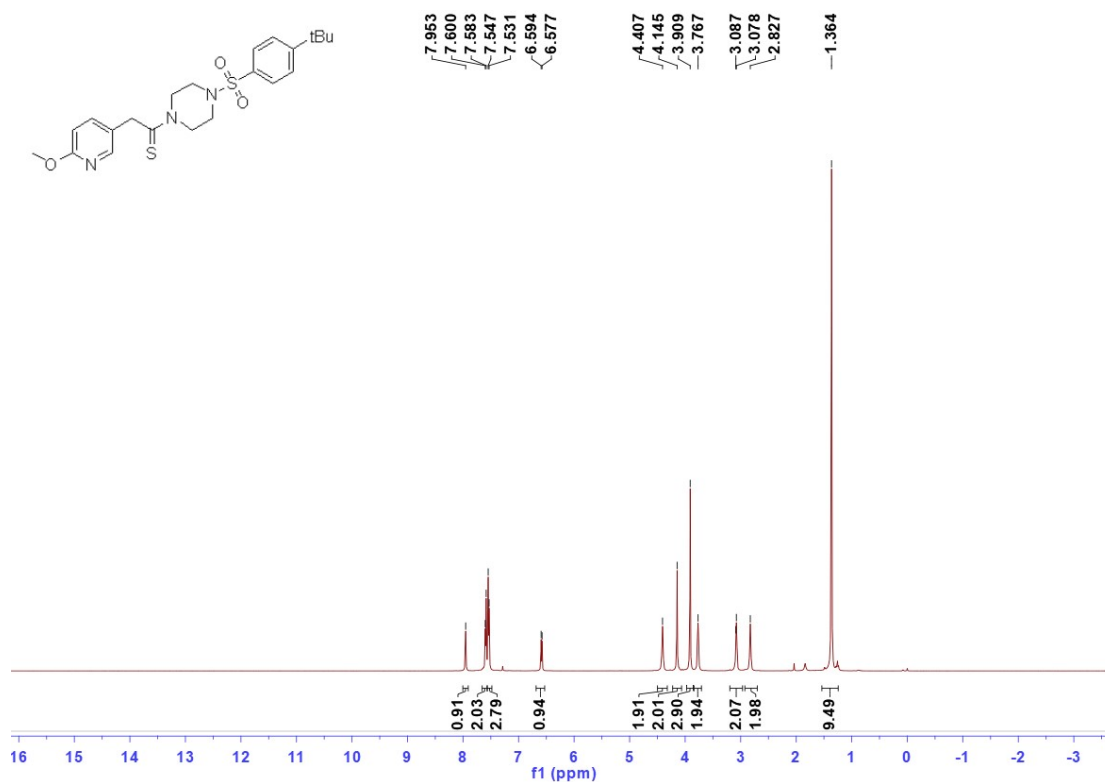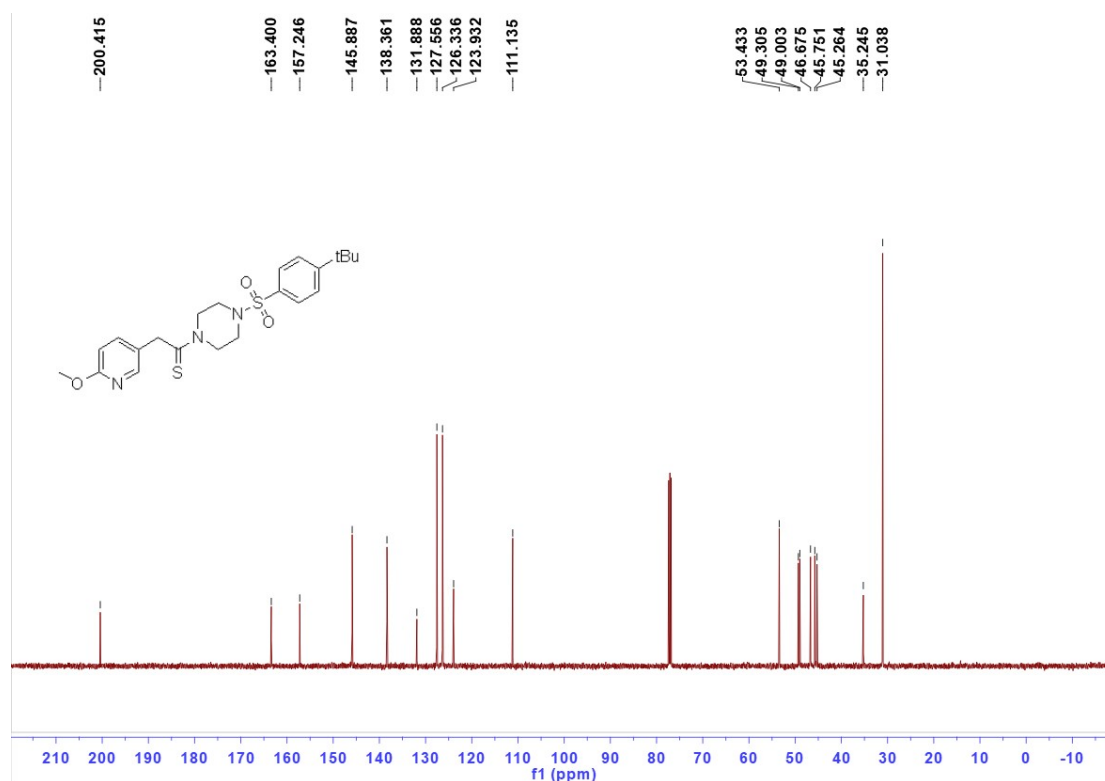

**2-(5-bromopyridin-3-yl)-1-(4-((4-(tert-butyl)phenyl)sulfonyl)piperazin-1-yl)ethane-1-thione (3ey)**

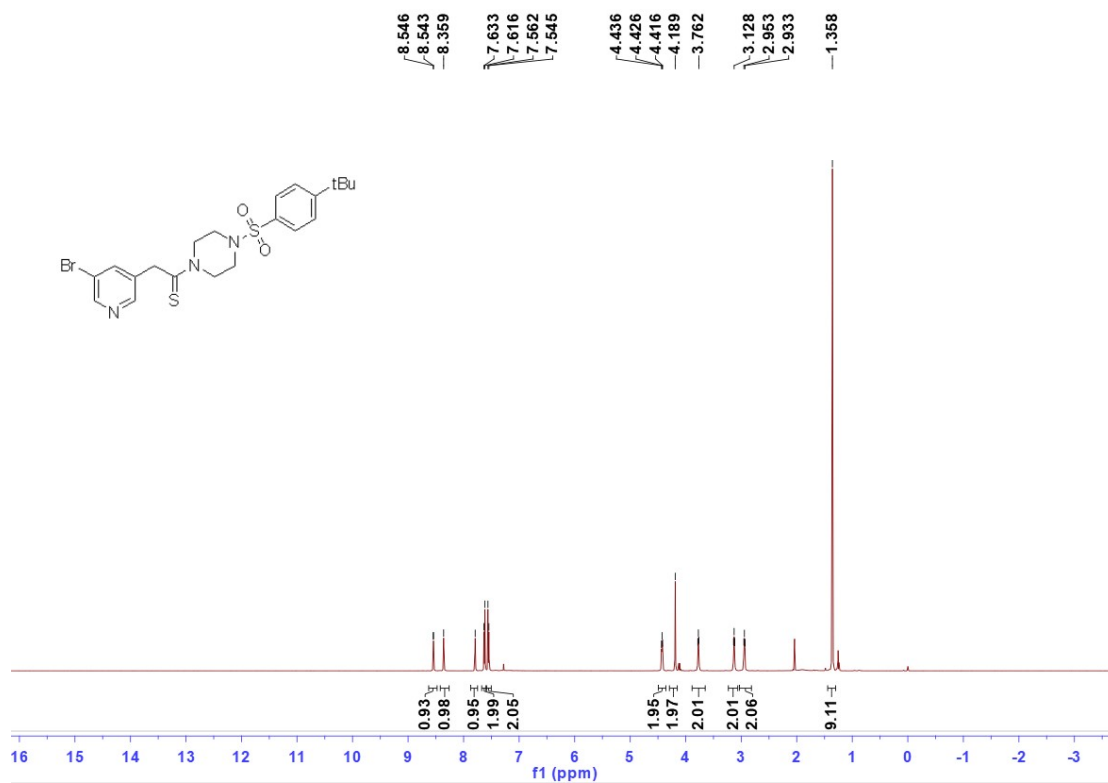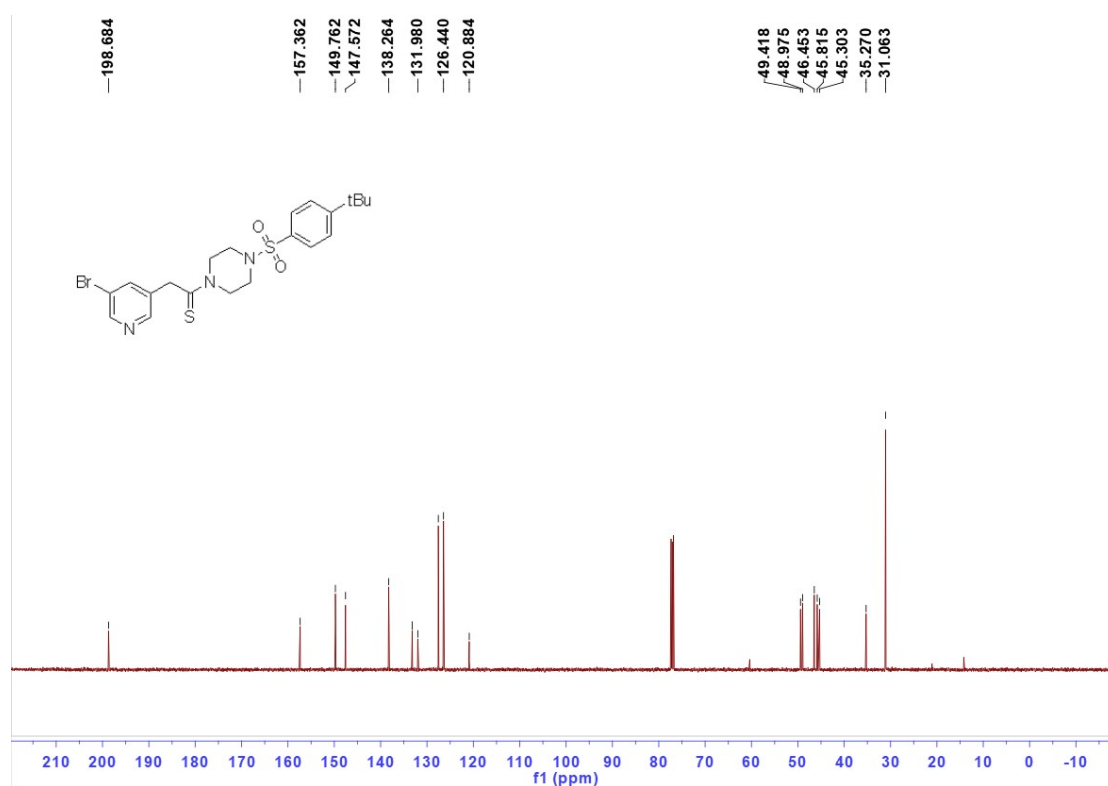

**1-(4-((4-(tert-butyl)phenyl)sulfonyl)piperazin-1-yl)-2-(pyridin-4-yl)ethane-1-thione (3ez)**

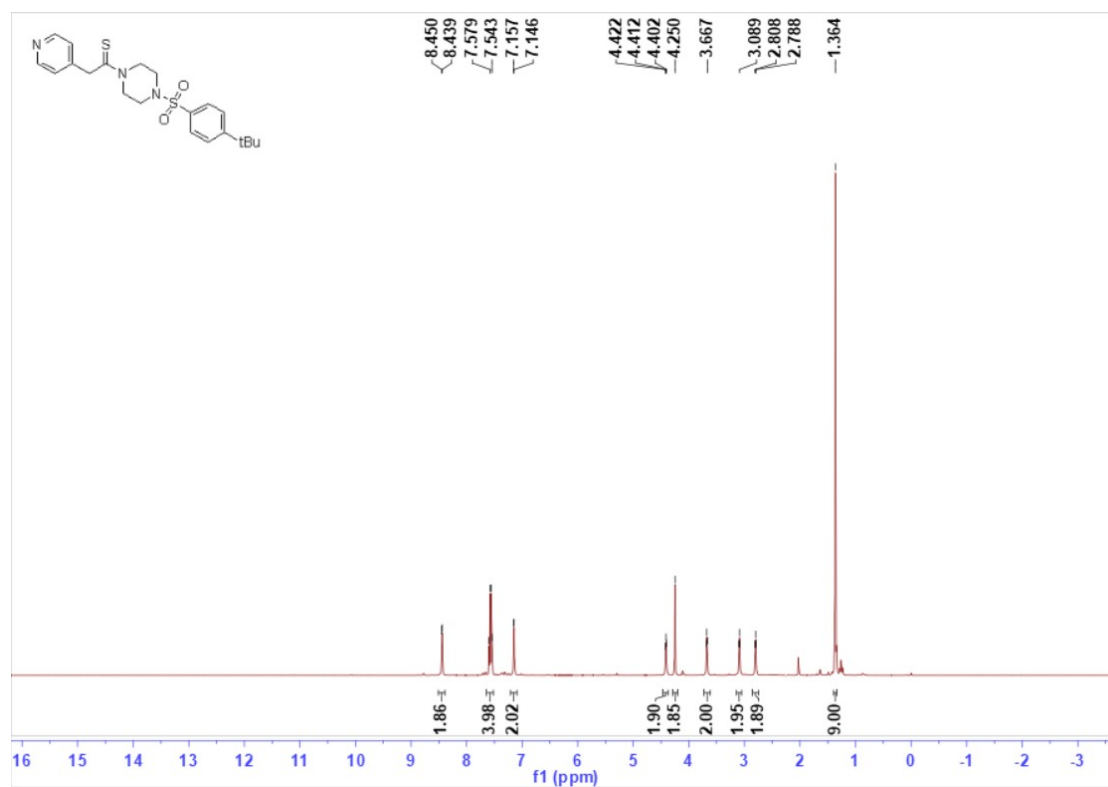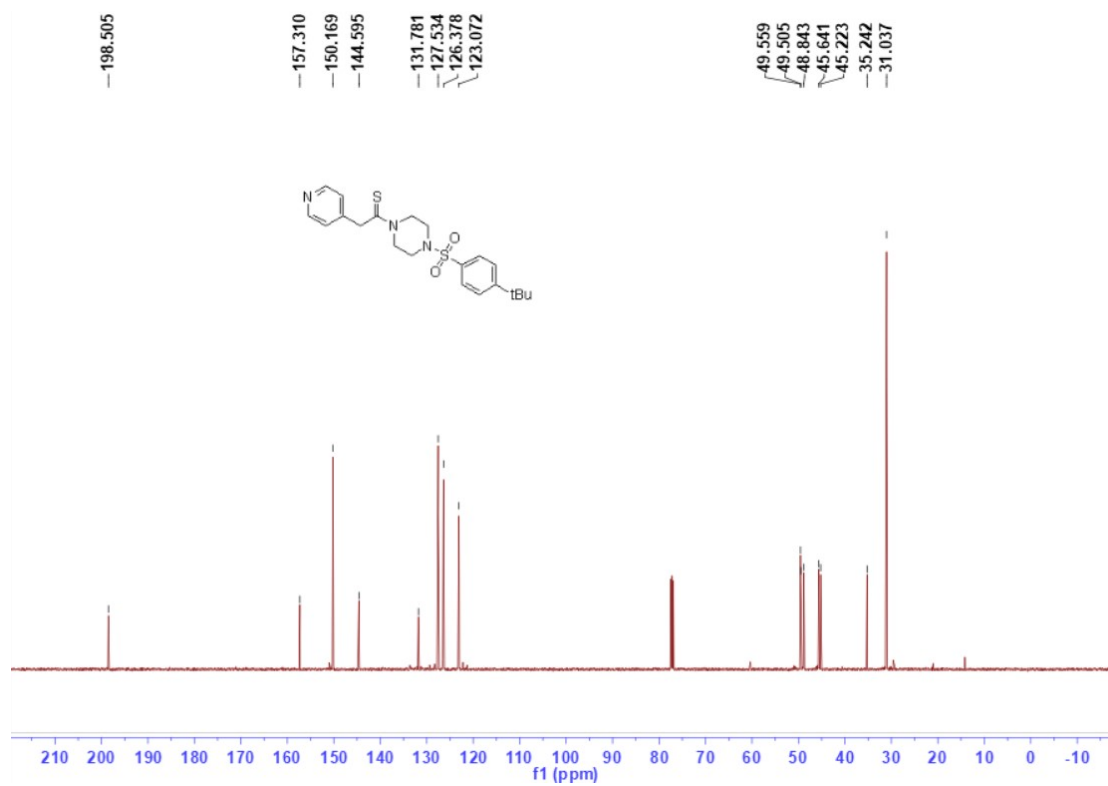

**1-(4-((4-(tert-butyl)phenyl)sulfonyl)piperazin-1-yl)-2-(3-methylpyrazin-2-yl)ethane-1-thione (3eza)**

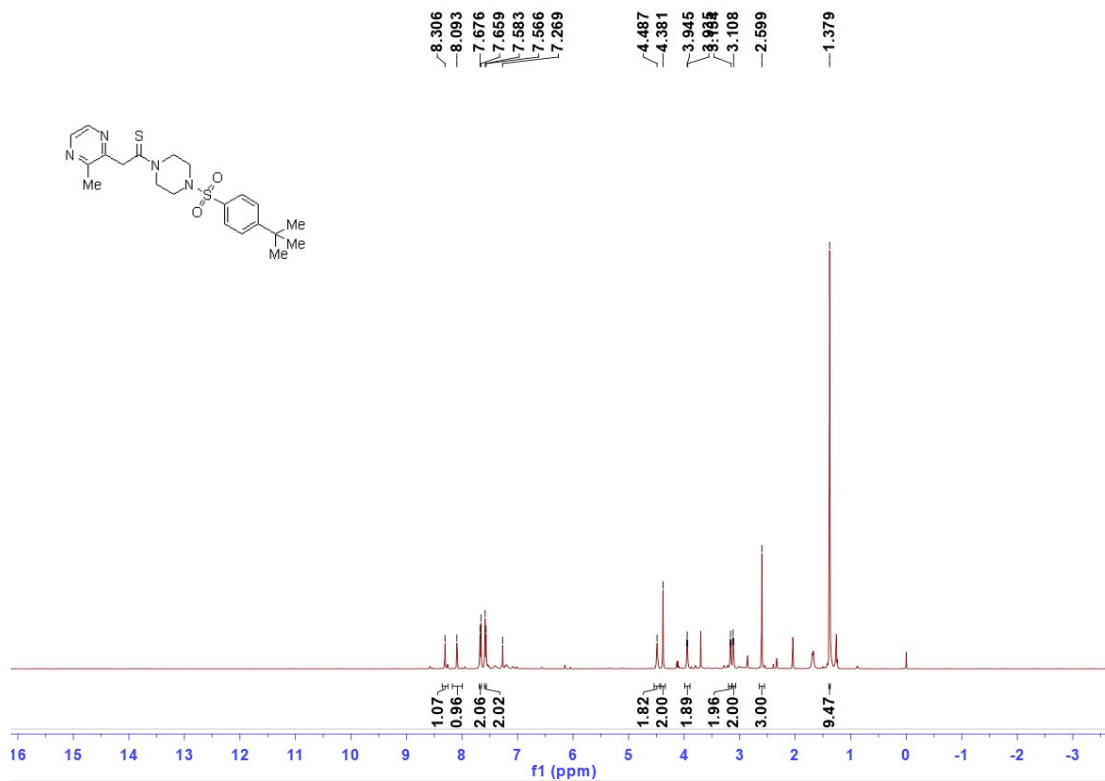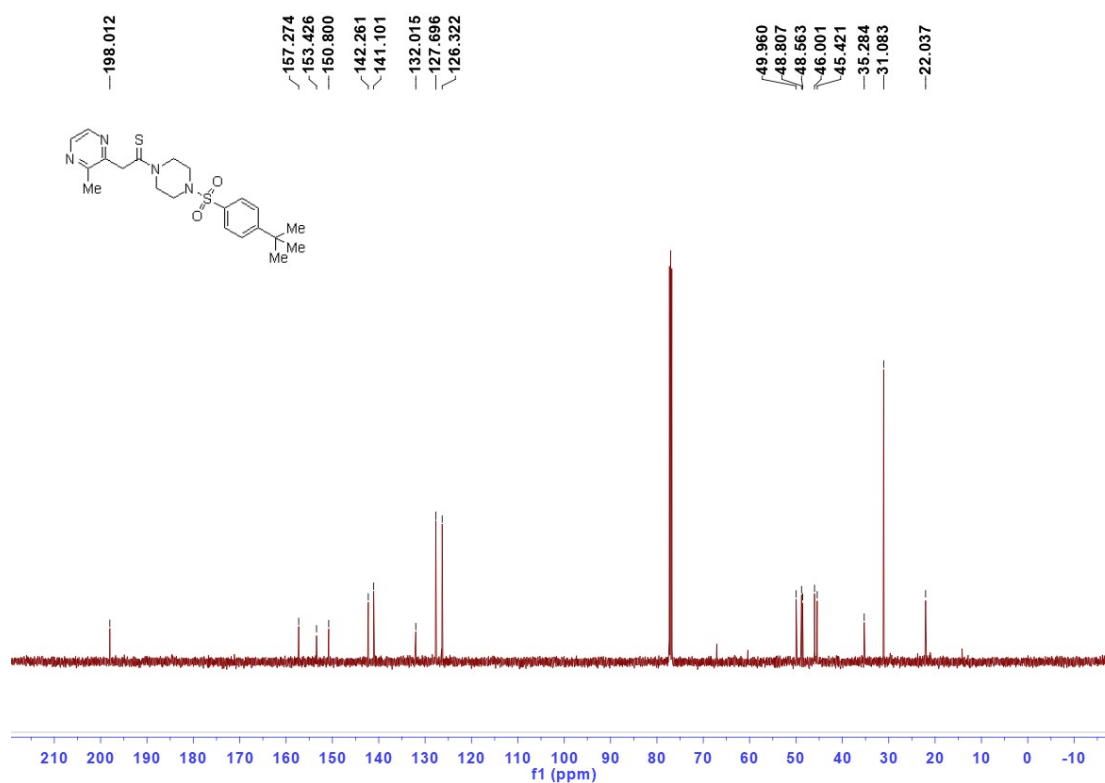

**1-(4-((4-(tert-butyl)phenyl)sulfonyl)piperazin-1-yl)-2-(1H-pyrrolo[2,3-b]pyridin-3-yl)ethane-1-thione (3ezb)**

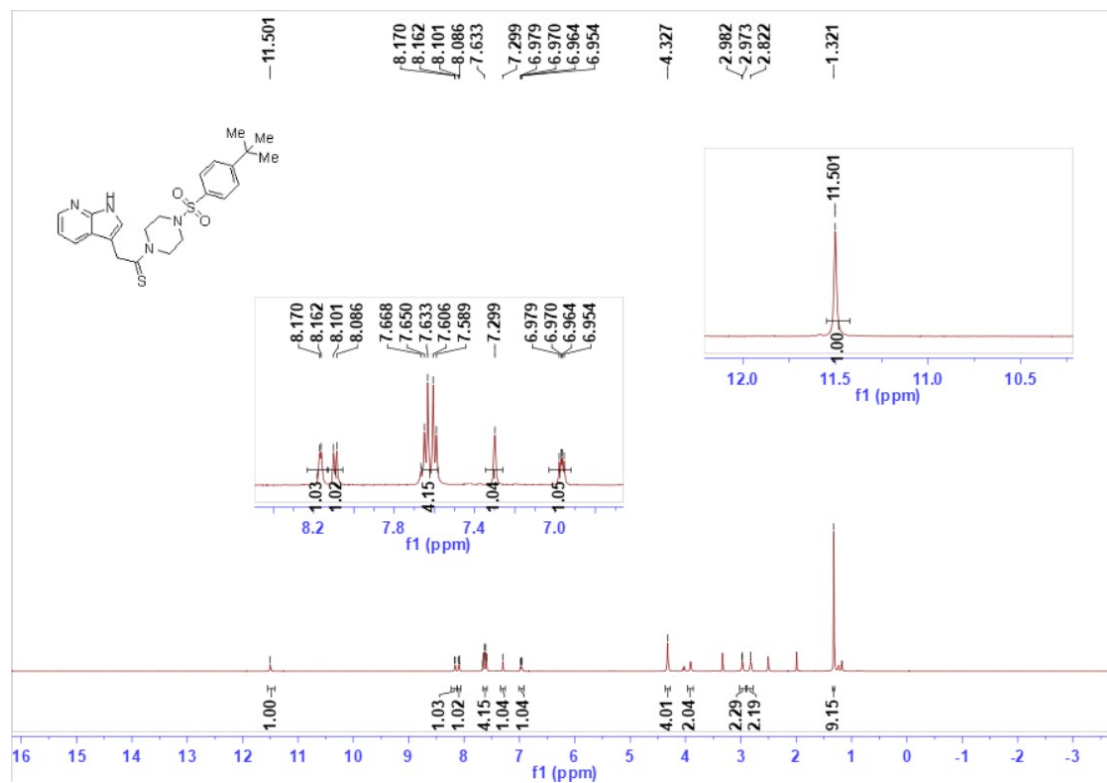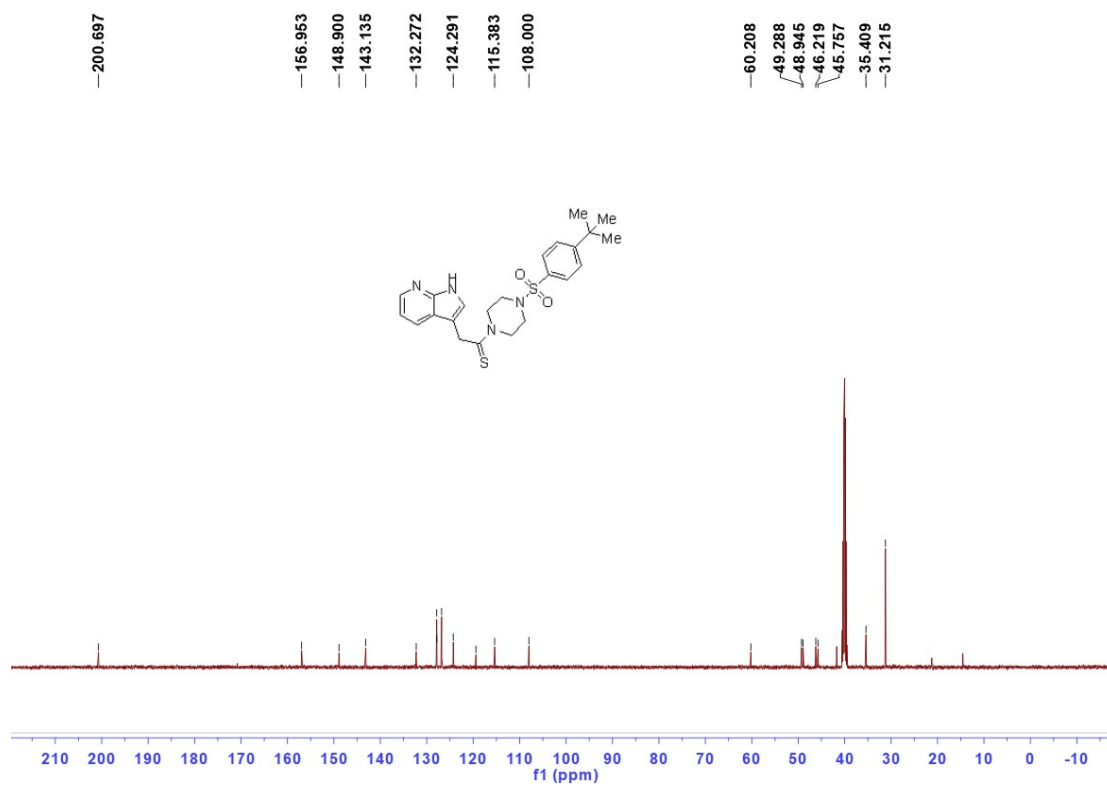

# *N*-methyl-*N*,2-diphenylethanethioamide-2-*d*

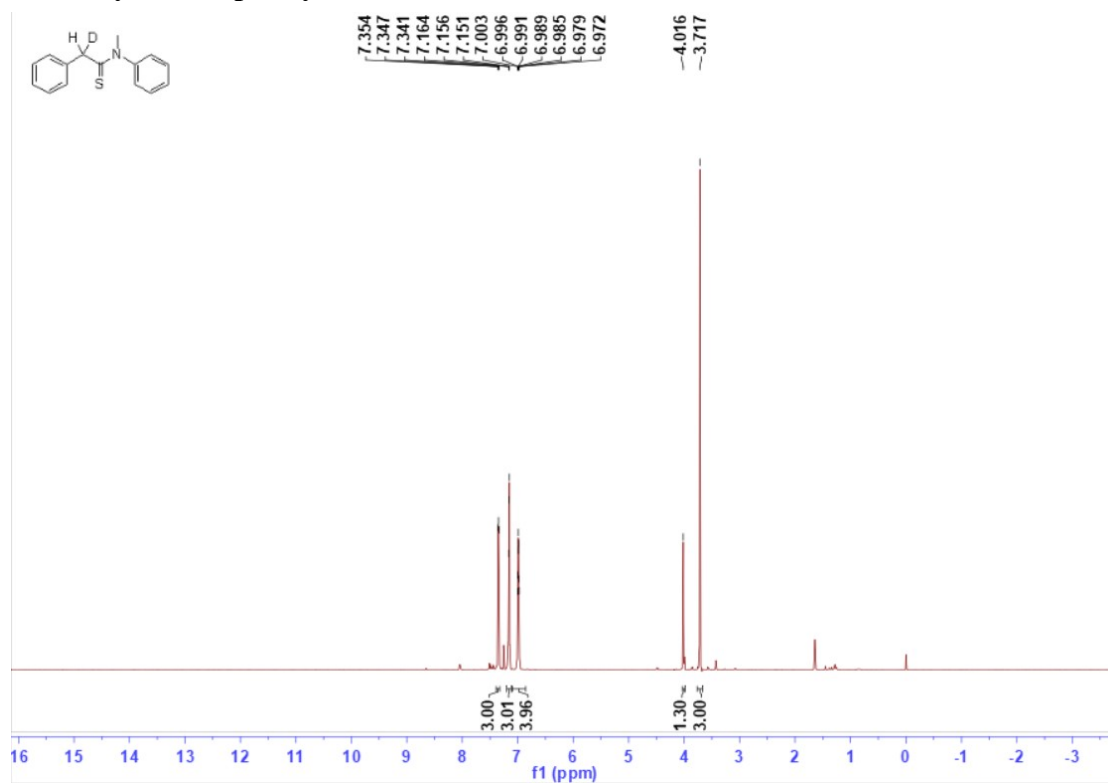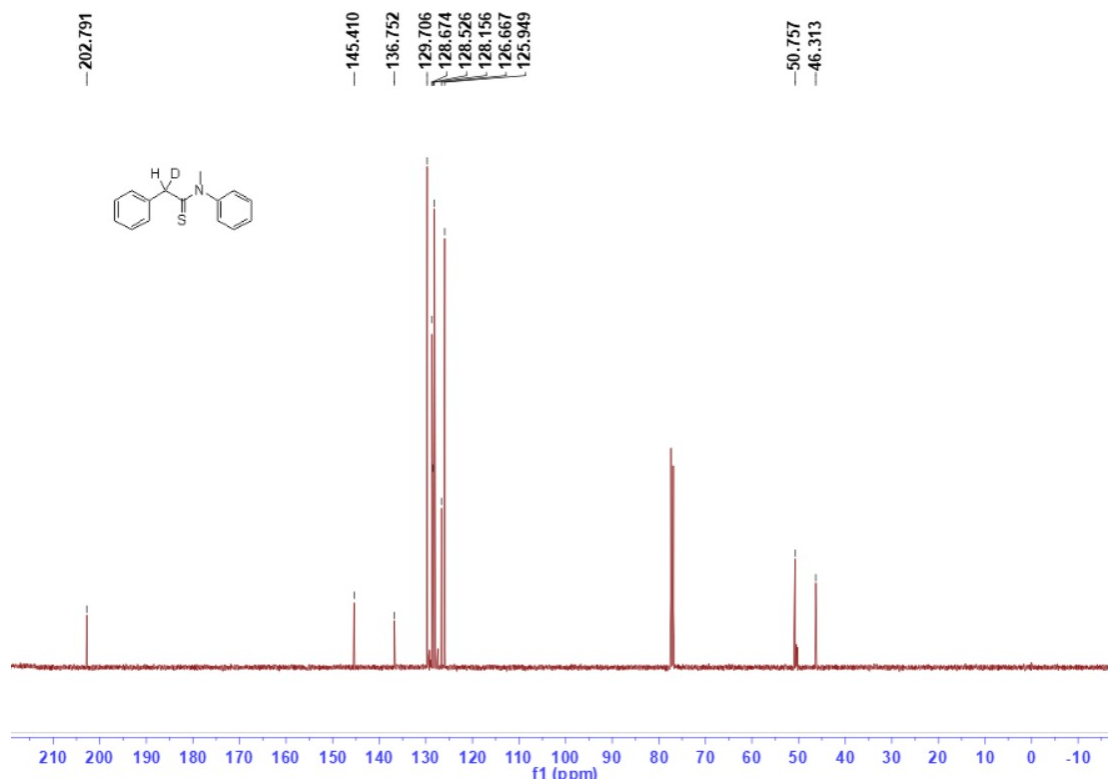

# (Xantphos)Cu(OAc)

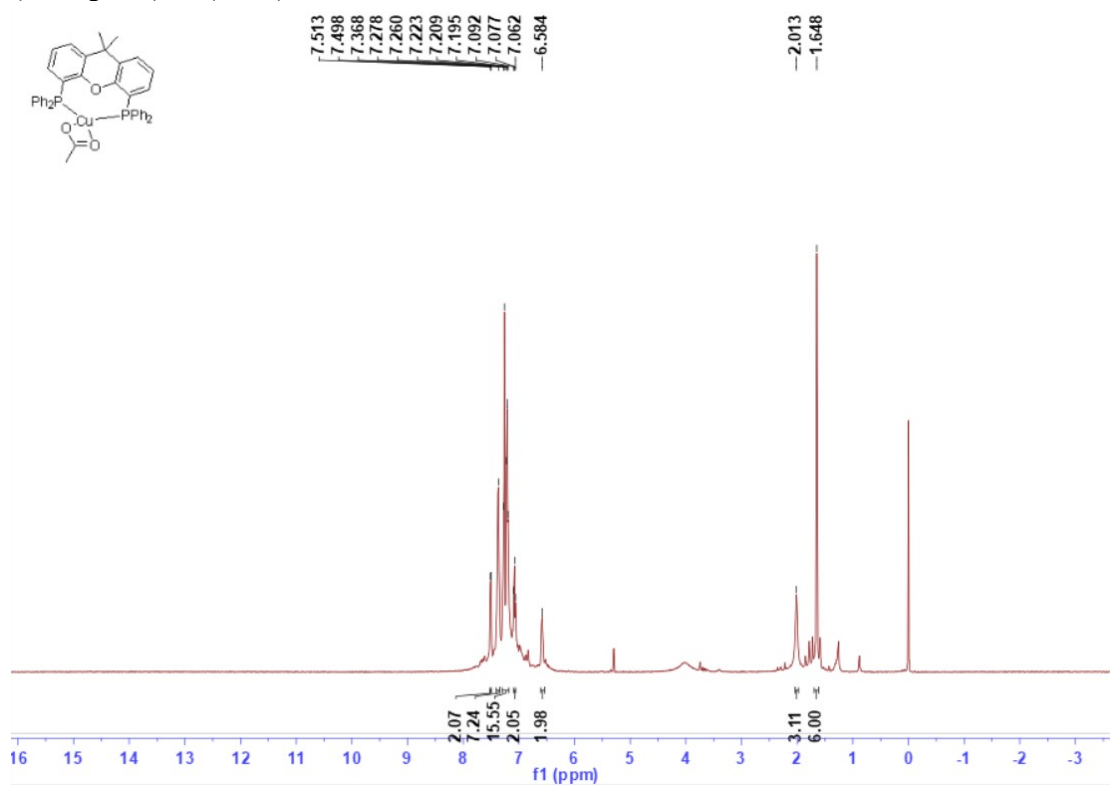

## IX. Reference

- [1] J. Chen, Y. Jiang, J. Yu, J. Cheng, *J. Org. Chem.* **2016**, *81*, 271-275.
- [2] C. Wang, X Geng, P. Zhao, Y. Zhou, Y. Wu, Y. Cui, A. Wu, *Chem. Commun.* **2019**, *55*, 8134-8137.
- [3] A. Mousa, R. Samer, *Molecules* **2004**, *9*, 957-967.
- [4] T. Ishikawa, M. Kimura, T. Kumoi, H. Iida, *ACS Catal.* **2017**, *7*, 4986–4989.
- [5] B. Liu, H. Bai, H. Liu, S. Wang, S. Ji, *J. Org. Chem.* **2018**, *83*, 10281–10288.
- [6] L. M. Pevzner, Y. O. Remizov, M. L. Petrov, *Russ. J. Gen. Chem.* **2015**, *85*, 61–70.
- [7] D. Kurandina, V. Gevorgyan, *Org. Lett.* **2016**, *18*, 1804–1807.
- [8] J. Li, Yao. Sha, *Molecules* **2008**, *13*, 1111-1119.
- [9] H. Cheng, T. Lam, Y. Liu, Z. Tang, C. Che, *Angew. Chem. Int. Ed.* **2021**, *60*, 1383–1389.
- [10] Y. Zhang, M. Islam, S. McAlpine, *Org. Lett.* **2015**, *17*, 5149-5151.
- [11] Z. Kokan, S. Kirin, *RSC Adv.* **2012**, *2*, 5729–5737.
- [12] A. Genoni, M. Benaglia, E. Mattiolo, S. Rossi, L. Raimondi, P.C. Barrulas, A.J. Burke. *Tetrahedron Lett.* **2015**, *56*, 5752–5756.
- [13] I. Kazia, G. Sekar, *Org. Biomol. Chem.* **2019**, *17*, 9743-9756.
- [14] W. Li, X. Wu, Z. Zhao, A. Qin, R. Hu, B. Tang, *Macromolecules* **2015**, *48*, 7747–7754.
- [15] P. Zhang, W. Chen, M. Liu, H. Wu, *J. Org. Chem.* **2018**, *83*, 14269–14276.
- [16] T. Nguyen, M. Tran, L. Ermolenko, A. Mourabit, *Org. Lett.* **2014**, *16*, 310–313.
- [17] L. Liu, Z. Guo, K. Xu, S. Hui, X. Zhao, Y. Wu, *Org. Chem. Front.* **2018**, *5*, 3315-3318.
- [18] S. Raucher, P. Klein, *Tetrahedron Lett.* **1980**, *21*, 4061-4064.
- [19] M. Saito, S. Murakami, T. Nanjo, Y. Kobayashi, Y. Takemoto, *J. Am. Chem. Soc.* **2020**, *142*, 8130-8135.
- [20] G. Seybold, C. Heibl. *Chemische Berichte* **1977**, *110*, 1225-1238.
- [21] Y. Lu, Y. Sun, A. Abdukader, C. Liu. *Synlett* **2021**, *32*, 1044-1048.
- [22] K. L. Manasa, S. Pujitha, A. Sethi, M. Arifuddin, M. Alvala, A. Angeli and C. T. Supuran. *Metabolites* **2020**, *10*, 136.
